# Supplementary material
Source: HighWire-hosted journal article supplement (https://bjsm.bmj.com/content/53/2/124)
Supplement: inline-supplementary-material-1 [file inline-supplementary-material-1.docx]

# Additional Results:

## Study Characteristics

### Fetal heart rate during acute exercise

#### Randomized controlled trials

There was one randomized controlled trial (RCT) which reported on FHR during exercise (n=7); it could not be included in the meta-analysis because it did not report standard deviations.1

#### Non-randomized interventions

There were three non-randomized interventions (n=70) reporting on FHR during acute exercise sessions.2-4 The women in these studies were tested between 24-40 weeks gestation, and all women were performing vigorous to high intensity aerobic exercise between 7 and 25 minutes.

#### Cross sectional studies

There were six cross-sectional studies (n=72) reporting on FHR during acute exercise sessions.5-10 The women were tested in the second5 and third trimester.6-10 Exercise modality included only aerobic exercise. Exercise sessions included low,9 moderate,7 8 10 and vigorous to high5 6 intensity activities performed for 5 to 40 minutes in duration. One study included women with small for gestational age (SGA) fetuses (n=20).11

#### Cohort Studies

There were nine cohort studies reporting on FHR during acute exercise sessions (n=193).11-19 The women were tested between 15-40 weeks gestation, and all but one study tested women exclusively in the third trimester.14 Exercise modality included aerobic activities11-14 16 17 19 and resistance training.15 18 Exercise intensity included low,15 18 moderate13 17 19 and vigorous12 16 activities ranging from 10 to 20 minutes in duration.

### Fetal heart rate following acute exercise

#### Randomized controlled trials

There were seven RCTs (n=245 women) reporting on FHR following acute exercise sessions.1 20-25 One study (n=13) could not be included in the meta-analysis because it did not report standard deviations.1 One study included women (n=17) who were diagnosed with gestational diabetes mellitus receiving insulin therapy.20 Women were 12-38 weeks gestation when they were tested for acute FHR responses. Exercise modality included aerobic,1 20-24 and yoga.25 Exercise intensity included low,25 moderate 1 21-24 and vigorous20 23 24 activities ranging from 3-60 minutes in duration.

#### Non-randomized interventions

There were four non-randomized interventions (n=130 women) reporting on FHR following acute exercise sessions.2-4 26 All but one study included women who were previously inactive.3 Women were tested in both the second and third trimesters in all studies.2-4 26 All exercise studies include aerobic activities of moderate2 and vigorous3 4 26 intensities ranging from 7 to 50 minutes in duration.

#### Cross Sectional Studies

There were 20 cross-sectional studies (n=513 women) reporting on FHR following acute exercise sessions.5-10 27-40 Women were tested between 26 and 41 weeks gestation. All but one study included aerobic exercise; this study was a resistance training study.30 Exercise sessions included low,6 9 32 34 moderate,7 8 10 30 32 33 35-40 and vigorous5 27-29 31 32 intensity activities ranging from 5 to 40 minutes in duration.

#### Cohort Studies

There were 33 cohort studies (n=882 women) reporting on FHR following acute exercise sessions.11-16 18 19 41-64 Women were tested between 12 and 41 weeks gestation. Exercise sessions included aerobic activities, 11-14 16 19 41-51 54-64 resistance training,15 18 52 and yoga.53 Exercise sessions included low,18 52 53 62 moderate11 13 14 19 49 55 57 61 and vigorous14 44-48 50 51 54 56 58-60 63 64 intensity activities ranging from 5 to 60 minutes in duration.

#### Case Control Studies

There were two case-control studies (n=84 women) reporting on FHR following acute exercise sessions.65 66 Women were tested between 22 weeks gestation65 and term (not defined).66 They all preformed aerobic exercise of low65 and moderate66 intensity for 17.5 to 60 minutes in duration.

### Incidence of bradycardia and tachycardia

#### Incidence of bradycardia at rest

There were 24 studies (n=1,711 women) reporting on the incidence of bradycardia at rest. They include two RCTs ,25 67 three non-randomized interventions,2 4 68 nine cross sectional,5 7 8 10 28 38 69-71 and 10 cohort studies.14 15 48 50 51 56 59 72-74 Two of the studies were identified to potentially have artifact, which would increase the reported incidence of bradycardia.7 71 Women were tested between 25-40 weeks gestation. With the exception of one resistance training study15 and one yoga intervention,25 all exercise sessions included aerobic exercise. Exercise sessions were of low,15 25 71 moderate,2 7 8 10 14 38 67-70 73 and vigorous intensity4 5 14 28 48 50 51 56 59 72 74. Exercise sessions were between 5 and 60 minutes in duration.

#### Incidence of tachycardia

There were 13 studies (n=644 women) reporting on the incidence of tachycardia at rest, during exercise, or following exercise.1 2 4 8 15 25 27 40 48 50 54 58 72 They include one RCTs,25 three non-randomized interventions,1 2 4 three cross sectional,8 27 40 and six cohort studies.15 48 50 54 58 72 All but one study included aerobic exercises; this study was a yoga session.25 Studies ranged from 7-60 minutes in duration and took place from 12-38 weeks gestation. Exercise sessions included low,15 25 moderate,1 2 8 40 and vigorous4 27 48 50 54 58 72 intensity activities.

### Chronic Prenatal Exercise

#### Effect of chronic prenatal exercise on fetal heart rate at rest

There were 16 studies (n=595 women) reporting on FHR at rest following an exercise intervention.1-4 21-26 49 54 75-78 Of these, there were eight RCTs (n=323 women), 1 21-25 75 three non-randomized interventions (n=70 women),1 2 4 one cross-sectional study (n=61 women) and four cohort studies (n=118 women). Of the RCTs, four included aerobic exercise only,1 21 22 26 one was a superiority trial comparing yoga to walking,75 while the other two included a combination of aerobic activities and resistance training.23 24 One RCT consisted of a single exercise session only (yoga).25 Two of the non-randomized interventions included aerobic exercise only4 and the third included a combination of aerobic activities and resistance training.2 Exercise frequency ranged from three to six days per week and consisted of sessions lasting 15 to 60 minutes. Nine of the interventions were supervised (all sessions supervised), 1-4 22-26 one was unsupervised,75 and it was unclear from one trial whether it was supervised or not.21 The compliance to the interventions was reported in six studies and ranged from 74-100%.2-4 23 24 49 Four studies included women who were previously inactive4 22-24 while the rest did not spcify previous exercise levels of the women.

#### Effect of chronic prenatal exercise on the fetal heart rate response during exercise

There were no RCTs reporting on FHR during exercise post-intervention. There were two non-randomized interventions (n=58 women) which reported on the change in FHR during exercise post-intervention. 2 4 One included aerobic activities only4 while the other included a combination of aerobic activities and resistance training intervention.2 The exercise frequency for both interventions was three times per week, at a moderate intensity for 15-25 minutes. 2 4 The acute exercise sessions included aerobic activities lasting from 7-15 minutes and were of moderate to vigorous intensity. 2 4 Both interventions were supervised, with compliance ranging between 74-86%.2 4 One study included women who were previously inactive,4 the other did not define previous physical activity levels of the women.2

#### Effect of chronic prenatal exercise on the fetal heart rate response following exercise

There were six studies (n=249 women) which reported on the change in FHR following exercise post-intervention.2 4 21-24 Four were RCTs (n=91 women) 21-24 and two were non-randomized interventions (n=58 women) 2 4 Three included aerobic activities only4 21 22 while the other three included a combination of aerobic activities and resistance training.2 23 24 The exercise frequency was three to six times per week, at a moderate to vigorous intensity for 15-60 minutes. 2 4 21-24 The acute exercise sessions included aerobic activities lasting from 3-20 minutes and were of moderate to vigorous intensity. 2 4 21-24 All but one21 interventions were supervised, with compliance ranging between 74-86%.2 4 23 24 Four studies included women who were previously inactive,4 22-24 and two did not define previous physical activity levels of the women.2 21

### Umbilical Artery Blood Flow

#### Umbilical artery blood flow during acute exercise

There were two studies (n=41 women) reporting on the change in umbilical artery blood flow during acute exercise sessions compared to rest.16 25 Both studies reported on the umbilical artery systolic/diastolic ratio (S/D; arbitrary units).16 25 One cohort study included an aerobic exercise session lasting less 12 minutes at a vigorous to high intensity,16 while the other was a randomized controlled trial which included a single yoga session (low intensity) for 60 minutes.25

#### Umbilical artery blood flow following acute exercise

There were 17 studies (n=469 women) reporting on the change in umbilical artery blood flow following acute exercise sessions compared to rest.16 25 29-31 34 41 42 46 49 61 70 74 79-82 Two studies (49 women) were RCTs,25 80 eight were cohort studies (279 women),16 41 42 46 49 61 74 81 82 and six studies (141 women) were cross-sectional.29-31 34 70 79 Ten studies (197 women) reported on the change in umbilical artery S/D following acute exercise. 16 25 29 31 34 42 46 49 70 74 Seven studies (293 women) reported on the change in umbilical artery pulsatility index (PI) following exercise.25 30 31 61 79 80 82. Five studies (128 women) reported on the change in umbilical artery resistance index (RI) following acute exercise.25 31 41 61 81 Women were tested between 14-42 weeks gestation. The exercise sessions were all aerobic exercise except one study which included yoga25 and one study which included resistance exercise.30 80 Three studies included women who were previously inactive,31 41 49 two included women who were active,31 79 and the rest were undefined. Exercise sessions were of low,25 34 80 moderate,30 42 49 61 70 81 82 and vigorous to high16 29 31 41 46 74 79 intensity. Exercise session were between 5-60 minutes in duration.

#### Effects of chronic exercise on umbilical blood flow

There were five studies (n=403 women) which reported on the effects of exercise intervention on resting umbilical artery S/D, PI, or RI.75 80 83-85 Three were RCTs, although one was a superiority trial comparing a yoga program to a walking program.75 There was one non-randomized intervention comparing a yoga program to walking program.84 Two studies (n=99 women) reported on umbilical artery S/D at rest following exercise intervention.75 83 Three studies (n=158 women) reported on umbilical artery PI at rest following exercise intervention.75 80 83 Two studies (n=99 women) reported on umbilical artery RI at rest following exercise intervention.75 83 Exercise frequency ranged from two to seven days per week. Exercise types included aerobic exercise,75 83 84 yoga,75 84 and pelvic floor muscle training (PFMT).80 The duration of the session lasted between 20 to 60 minutes and included low75 80 84 and moderate83 intensity activities. Two studies included supervised exercise sessions,80 83 while two did not.75 84

One RCT (n=26 women) reported on the umbilical artery PI response to acute exercise following exercise intervention.80 The intervention was supervised PFMT (low intensity) for two to seven days per week for approximately 20 minutes each session.80

### Uterine Artery Blood Flow

#### Uterine artery blood flow during acute exercise

There were two studies (n=32 women) reporting on the change in uterine artery blood flow during acute exercise sessions compared to rest.16 18 Both studies reported on the uterine artery S/D.16 18 One cohort study included aerobic activities for less than 12 minutes in duration at a vigorous intensity,16 while one cohort study included supine resistance exercise (leg lifts; low intensity) for 10 minutes.18

#### Uterine artery blood flow following acute exercise

There were 14 studies (n=429 women) reporting on the change in uterine artery blood flow following an acute exercise session compared to rest.16 18 31 34 36 41 61 65 80 81 86-89 One was a RCT (n=26 women),80 five were cross-sectional (n=193 women),31 34 36 86 87 seven were cohort studies (n=198 women),16 18 41 61 81 88 89 and one was a case control study (n=12 women).65 There were five studies (n=103 women) reporting on the change in uterine artery S/D following acute exercise. 16 18 31 34 86 There were seven studies (n=312 women) reporting on the change in uterine artery PI following acute exercise.31 36 61 65 80 87 88 There were five studies (n=117 women) reporting on the change un uterine artery RI following acute exercise.31 41 61 81 89 Women were tested between 16-41 weeks gestation and included aerobic activities in all but two studies which did resistance training18 or PFMT.80 Exercise sessions were 5-22 minutes in duration and were of low,18 65 80 89 moderate,36 61 81 and vigorous16 31 41 86 87 intensity activities.

#### Effects of chronic exercise on uterine artery blood flow

There were four studies (n=256 women) which reported on the effects of exercise intervention on resting uterine artery S/D, PI, or RI.75 80 84 85 Three studies (n=243 women) were RCTs,75 80 85 although one (n=59 women) was a superiority trial comparing a yoga program to a walking program.75 One study was a non-randomized intervention comparing yoga to walking.84 One study (n=59 women) reported on uterine artery S/D at rest following exercise intervention.75 Two studies (n=118 women) reported on uterine artery PI at rest following exercise intervention.75 80 One study (n=59 women) reported on uterine artery RI at rest following exercise intervention.75 Exercise frequency ranged from two to seven days per week, and included aerobic exercise,75 84 85 yoga,75 84 and pelvic floor muscle training (PFMT).80 Exercise sessions lasted 15 to 60 minutes in duration and included low75 80 84 and vigorous85 intensity activities. Two studies included supervised exercise sessions,80 85 while two did not.75 84

One study (n=26 women) reported on the uterine artery PI response to acute exercise following exercise intervention.80 The intervention was supervised PFMT (low intensity) for two to seven days per week for approximately 20 minutes each session.80

## Results for fetal tachycardia, the effects of chronic exercise on fetal heart rate, umbilical blood flow, and uterine blood flow.

### Fetal tachycardia

There was “very low” quality evidence from eight studies (n=505 women; 524 assessments) reporting the proportion of tachycardia at rest to be 3% (95% CI 0.00, 0.14; I2= 86%; See Online Supplement Figure 88; *proportions*).1 15 25 27 48 50 54 58 The quality of evidence was downgraded from “low” to “very low” due to serious inconsistency. There was “very low” quality evidence from five studies (n=77 women; 188 assessments) reporting tachycardia during 5% of acute exercise sessions (95% CI 0.02, 0.16; I2= 72%; See Online Supplement Figure 89; *proportions*).1 4 8 15 27 There was “very low” quality evidence from 13 studies (n=644 women; 769 assessments) reporting fetal tachycardia following exercise (up to 20 minutes) in 7% of exercise sessions (95% CI 0.03, 0.15; I2=83%; See Online Supplement Figure 90; *proportions*).1 2 4 8 15 25 27 40 48 50 54 58

### The effects of chronic exercise on resting fetal heart rate

There was “moderate” quality evidence from four RCTs (n=191 women) showing no impact of exercise training on resting FHR post-intervention (MD= -1.72 bpm, 95% CI -3.94, 0.50, I2= 0%, p=0.13, see Online Supplement Figure 15).21-24 The quality of evidence was downgraded from “high” to “moderate” due to serious risk of bias and serious inconsistency. The tests for subgroup differences performed for exercise-only interventions were not significant (see Online Supplement Figures 16 and 17).

There was “very low” quality evidence (downgraded due to serious risk of bias) from two non-randomized interventions (n=58 women) demonstrated a decrease in resting FHR of 2.1bpm in the exercise group compared to the control group post-intervention (95% CI -3.38, -0.89, I2= 0%, p=0.013, see Online Supplement Figure 18).2 4 The tests for subgroup differences performed for exercise-only interventions were not significant (see Online Supplement Figures 19 and 20). There was “low” quality evidence from one superiority trial (n=59 women) showed no difference in resting FHR following yoga or walking intervention (MD= 3.70bpm, 95%CI, 1.34, 8.74, I2=n/a, p=0.15; see Online Supplement Figure 21).75 Evidence was downgraded from “high” to “low” due to serious risk of bias and serious inconsistency. Four interventional studies (n=108 women; two RCTs and two non-randomized interventions) could not be included in the pooled analysis due to the absence of a control group,1 26 54 or because they only included FHR information from single exercise sessions.25 These studies found resting FHR was 6.5 to 18.5 bpm lower post-intervention in the exercise intervention group.

Further, there was “very low” quality of evidence from three cohort studies (n=120 women) reported on the effects of chronic prenatal exercise on resting FHR. Evidence was downgraded from “low” to “very low” due to serious inconsistency. One cohort study (n=32 women) reported a decrease in resting FHR in the exercise group compared to the control group in late pregnancy (MD= -9.21, 95% CI, -15.86, -2.55, I2=0%, p=0.007; see Online Supplement Figure 22).76 Two studies were not included in the pooled analysis because they had no control group,49 or did not present raw data.78 Additional data for these studies can be found in the Online Supplement **Table 1 & 2**. They reported that resting FHR decreased with advancing gestation in women who exercised,49 and that FHR at rest in the third trimester was correlated with minutes of LTPA spent in non-continuous activities (e.g. resistance training).78 There was “very low” quality evidence from one cross-sectional study (n=62 women; downgraded from “low” to “very low” due to serious inconsistency) reported decrease in resting FHR in the exercise group compared to the control group in late pregnancy (MD= -4.93, 95% CI, -8.32, -1.54, I2=90%, p=0.004; see Online Supplement Figure 23).3 77

### The effect of chronic exercise on the FHR response to acute exercise

#### FHR response during exercise

There was “very low” quality evidence from two non-randomized interventions (n=49 women) showing no difference in the FHR response during exercise between exercise and control groups (MD= -1.95bpm, 95% CI -15.06, 11.17, I2= 77%, p=0.77, see Online Supplement Figure 24).2 4 The quality of evidence was downgraded from “low” to “very low” due to serious risk of bias, serious inconsistency, and serious imprecision. The tests for subgroup differences performed for exercise-only interventions were not significant (see Online Supplement Figures 25 and 26).

#### FHR response following exercise

There was “low” quality evidence from four RCTs (n=193 women) showed no difference in the FHR between exercise and control groups following an acute exercise session (MD= -3.39bpm, 95% CI -10.51, 3.73, I2=81%, p=0.35, see Online Supplement Figure 27). 21-24 The quality of evidence was downgraded due to serious risk of bias and serious inconsistency. The tests for subgroup differences performed for exercise-only interventions were only significant when comparing studies by the type of exercise included in the intervention (p<0.00001) (see Online Supplement Figures 28 and 29). Specifically, there was “moderate” quality evidence (downgraded due to serious risk of bias) showing that the increase in FHR following acute exercise was greater in exercising women who participated in aerobic exercise only interventions (MD= 6.52 bpm, 95% CI, 2.31, 10.74, I2= 0%, p= 0.002) while the increase in FHR following acute exercise was lesser in the exercising women who engaged in interventions with various types of exercise (MD= -9.16bpm, 95% CI, -13.46, -4.86, I2= 0%, p< 0.0001; see Online Supplement Figure 29).

There was “very low” quality evidence (downgraded due to serious risk of bias) from two non-randomized interventions (n=58 women) showed no overall difference in FHR following exercise between exercise and control groups (MD= -1.19bpm, 95% CI -6.08, 3.70, I2= 0%, p=0.63, see Online Supplement Figure 30). The tests for subgroup differences performed for exercise-only interventions were not significant (see Online Supplement Figures 31 and 32).

### The effects of prenatal exercise on umbilical artery blood flow metrics

#### The effects of acute exercise on umbilical artery S/D ratio

There was “low” quality evidence from two studies (n=41 women) reporting on the change in umbilical artery S/D during acute exercise suggesting no change from resting values (MD= -0.04, 95% CI, -0.10, 0.01, I2= 0%, p=0.14, see Online Supplement Figure 33).

There was “very low” quality evidence from 10 studies (n=197 women) showing no changes in umbilical artery S/D within three minutes following acute exercise compared to baseline (MD= -0.00, 95% CI, -0.14, 0.13, I2= 67%, p= 0.97, see Online Supplement Figure 34).16 25 29 31 34 42 46 49 70 74 The quality of evidence was downgraded from “low” to “very low” due to serious inconsistency. The tests for subgroup differences were not significant for *a priori* subgroup analyses (see Online Supplement Figures 35 and 36). In contrast, the tests for subgroup differences were significant for *post-hoc* subgroup analysis when comparing studies looking at different exercise intensities and durations (see Online Supplement Figures 37-39). Specifically, there was “very low” to “low” quality evidence (downdgraded from “low” to “very low” due to serious inconsistency) showing that following acute exercise of low and vigorous intensity umbilical artery S/D was not altered (MD= -0.03, 95% CI, -0.5, 0.19, I2=3%, p=0.80; MD= 0.08, 95%CI, -0.03, 0.19, I2= 30%, p=0.17, respectively), whereas following acute exercise of moderate intensity activities, umbilical artery S/D was decreased by -0.30 (95% CI, -0.47, -0.13, I2= 11%, p= 0.0007). Moreover, there was “very low” to “low” quality evidence (downdgraded from “low” to “very low” due to serious inconsistency) reporting that acute exercise of 0-20minutes and > 40 minutes decreased umbilical artery S/D (MD -0.16, 95% CI, -0.32, -0.00, I2= 39%, p=0.05; MD= -0.09, 95%CI, -0.30, 0.12, I2= 0%, p=0.41, respectively), whereas acute exercise of 21-39 minutes did not alter umbilical artery S/D (MD= 0.02, 95%CI, -0.32, 0.36, I2=n/a, p=0.91).

#### The effects of acute exercise on umbilical artery PI

No study reported on the umbilical artery PI during acute exercise. There was “very low” quality evidence from six studies (n=280 women) showing no change in the umbilical artery PI within five minutes following exercise (MD= -0.01, 95%CI -0.04, 0.02, I2= 71%, p= 0.58, see Online Supplement Figure 40).25 30 31 79 80 82 The quality of evidence was downgraded due to serious inconsistency. The tests for subgroup differences were not significant for both *a priori* subgroup analyses and *post-hoc* subgroup analyses (see Online Supplement Figures 41-45). One cohort study (n=13 women) could not be included in the pooled analysis because it did not report mean or SD and showed that the umbilical artery PI decreased following exercise.61

#### The effects of acute exercise on umbilical artery RI

There were no studies reporting on umbilical artery RI during acute exercise. There was “low” quality evidence from four studies (n=115 women) showing no difference in umbilical artery RI following exercise (MD= -0.02, 95% CI -0.04, 0.00, I2= 0%, p=0.02, see Online Supplement Figure 46).25 31 41 81 The tests for subgroup differences were not significant for *a priori* subgroup analyses (see Online Supplement Figure 47 and 48). One cohort study (n=13 women) could not be included in the pooled analysis because it did not report mean or SD and showed that umbilical artery RI decreased following exercise.61

#### The effects of acute exercise on umbilical artery volumetric blood flow and mean blood velocity

There were no studies reporting on umbilical artery volumetric blood flow or mean blood velocity during exercise. There were no studies reporting on umbilical artery volumetric blood flow following acute exercise. Thre was “very low” quality evidence from one cohort study (n=14 women; graded from “low” to “very low” due to serious inconsistency) which reported no chnage in umbilical artery mean blood velocity following acute exercise (MD= 1.5, 95% CI, -4.2, 1.20, I2 = n/a, p=0.28; see Online Supplement Figure 49).41

#### The effects of chronic exercise on resting umbilical artery blood flow metrics

##### Resting umbilical artery S/D

There was “low” quality evidence from one RCT (n=40 women; downgraded due to serious risk of bias and serious inconsistency) showing a decrease in resting umbilical artery S/D in the women who exercised compared to the controls post-intervention (MD= -0.52, 95% CI -0.56, -0.48, I2= n/a, p<0.00001, see Online Supplement Figure 50).83 “Moderate” quality evidence from one RCT, which was a superiority trial, (n=59 women; downgraded due to serious inconsistency) showed a decrease in resting umbilical artery S/D in the yoga group compared to the walking group post-intervention (-0.30, 95%CI, -0.58, -0.02, I2 n/a, p= 0.04; see Online Supplement Figure 51).75

##### Resting umbilical artery PI

There was “moderate” quality evidence from two RCTs (n=99 women; downgraded due to serious risk of bias) reporting lower resting umbilical artery PI in the women who exercised compared to the controls post-intervention (MD= -0.06, 95% CI -0.08, -0.04, I2= 0%, p<0.00001, see Online Supplement Figure 52).80 83 “Moderate” quality evidence from one randomized controlled trial, which was a superiority trial, (59 women; downgraded due to serious inconsistency) showed lower resting umbilical artery PI in yoga compared to walking (-0.18, 95%CI -0.28, -0.08, I2 not applicable, p=0.0008; see Online Supplement Figure 53).75

##### Resting umbilical artery RI

There was “low” quality evidence from one RCT (n=40 women; downgraded from “high” to “low” due to serious risk of bias and serious inconsistency) reporting a decrease in umbilical artery RI in the women who exercised compared to the controls post-intervention (MD= -0.07, 95% CI -0.07, -0.06, I2 not applicable, p<0.00001; see Online Supplement Figure 54).83 There was “moderate” quality evidence from one randomized controlled trial, which was a superiority trial, (59 women; downgraded from “high” to “moderate” due to serious inconsistency) showed no difference between yoga or walking groups following the interventions (-0.03, 95% CI -0.07, 0.01, I2= n/a, p=0.11; see Online Supplement Figure 55).75

One non-randomized intervention could not be included in the pooled analysis because it did not report blood flow, S/D, PI or RI; there was “very low” quality evidence from this study (n=13 women; downgraded from “low” to “very low” due to serious inconsistency) reporting no difference between groups on the umbilical Doppler velocimetry score before and after a yoga intervention .84

#### The effects of chronic exercise on the response of umbilical artery blood flow metrics to acute exercise

There were no RCTs or non-randomized interventions reporting on the umbilical artery S/D, or RI response to acute exercise. There was “moderate” quality evidence from one RCT including pelvic floor muscle training (PFMT; n=26 women; downgraded from “high” to “moderate” due to serious inconsistency) reported on acute exercise responses of the umbilical artery PI before and after the intervention and showed a smaller change in PI following exercise in the intervention group; however, the control group did not do acute exercise and therefore they could not be compared.80

### The effects of prenatal exercise on uterine artery blood flow metrics

#### The effects of acute exercise on uterine artery S/D

There was “very low” quality evidence from two studies (n=32 women) reporting no change in uterine artery S/D during acute exercise compared to rest (MD= 0.20, 95%CI, -0.38, 0.77, I2= 95%, p=0.51; see Online Supplemnt Figure 56).16 18 The quality of evidence was downgraded from “low” to “very low” due to serious inconsistency. There was “very low” quality evidence from five studies (n=103 women) reporting no change in uterine S/D following acute exercise compared to rest (MD= 0.15, 95%CI, -0.08, 0.38, I2= 87%, p=0.20; see Online Supplement Figure 57).16 18 31 34 86 The tests for subgroup differences were only statistically significant when comparing studies including women with different previous previous physical activity levels and not by type of exercise (see Online Supplement Figures 58 and 59). Specifically, there was “very low” to “low” quality evidence (downgraded due to serious inconsistency) showing that uterine S/D did not change following exercise in previously inactive women (MD= -0.11, 95%CI, -0.32, 0.10, I2=n/a, p=0.31) or in previously active women (MD= 0.02, 95%CI, -0.10, 0.14, I2= 26%, p=0.75), but was increased by 0.56 (95% CI, 0.41, 0.70, I2-0%, p<0.00001) in those whose previous activity levels were not defined (see Online Supplement Figure 58). Moreover, the tests for subgroup differences were not statistically significant for *post hoc* subgroup analysis (see Online Supplement Figures 59-62).

#### The effects of acute exercise on uterine artery PI

No study reported on the uterine artery PI during acute exercise. There was “low” quality evidence from seven studies (n=309 women) reporting on the uterine artery PI following exercise. 31 36 61 65 80 87 88 The pooled estimate wasbased on five studies (n=205 women) and showed no change within five minutes following exercise (MD=-0.01, 95%CI, -0.04, 0.01, I2= 8%, p= 0.29, see Online Supplement Figure 63).31 36 65 80 87 The tests for subgroup differences were not statistically significant (see Online Supplement Figures 64 and 65). The two cohort studies (n=107 women) that could not be included in the pooled analysis (did not report SD,61 or reported moment of the median (MoM))88 showed no change in the uterine artery PI before and after acute exercise.61 88

#### The effects of acute exercise on uterine artery RI

Uterine artery RI was not determined during exercise in any study. There was “very low” quality evidence from four studies (n=104 women) indicating uterine artery RI was not changed following acute exercise (MD=0.01, 95%CI -0.02, 0.04, I2= 50%, p=0.44, see Online Supplement Figure 65).31 41 81 89 The quality of evidence was downgraded from “low to “very low” due to serious inconsistency. The tests for subgroup differences were not statistically significant (see Online Supplement Figure 67). In contrast, the tests for subgroup differences were statistically significant for *post-hoc* subgroup analyses (see Online Supplement Figures 68 and 69). Specifically, there was “very low” to “low” quality evidence (downgraded from “low” to “very low” due to serious inconsistency) showing that low intensity exercise increased uterine artery RI by 0.07 (95% CI, 0.02, 0.12, I2= n/a, p=0.005), whereas moderate and vigorous intensity exercise did not change uterine artery RI (MD= -0.03, 95% CI, -0.08, 0.02, I2=n/a, p=0.19; MD= 0.01, 95% CI, -0.01, 0.03, I2=0%, p=0.47, respectively). Further, there was “very low” to “low” quality evidence (downgraded from “low” to “very low” due to serious inconsistency) showing that durations of 0-20 minutes and 20+ minutes do not result in an increase in uterine artery RI (MD= -0.01, 95% CI, -0.03, 0.01, I2=0%, p=0.38; MD= 0.04, 95% CI, -0.00, 0.08, I2=n/a, p=0.07, respectively), while undefined exercise durations report n increase in uterine artery RI following exercise (MD=0.07, 95% CI, 0.02, 0.12, I2= n/a, p= 0.005). There was “very low” quality evidence from one cohort study (n=13; downgraded from “low” to “very low” due to serious inconsistency) that was narratively summarized (did not report SD) showed no change in the uterine artery RI before and after acute exercise.61

#### The effects of acute exercise on uterine artery blood flow

There was “very low” quality evidence from one study (n=14 women; downgraded from “low” to “very low” due to serious inconsistency) reporting on uterine artery blood flow (ml/min) and blood velocity (cm/s) during and following supine exercise.18 Specifically, volumetric blood flow (ml/min) was not changed from left-lateral rest to during supine exercise (MD= -55, 95%CI, -113.9, 3.98, I2= n/a, p=0.07; see Online Supplement Figure 70), and was unchanged at left-lateral rest following supine exercise (MD= -1.0, 95%CI -53.76, 51.76, I2= n/a, p=0.97; see Online Supplement Figure 71).18 Mean blood velocity (cm/s) was not changed from left-lateral rest to during supine exercise (MD= 5.0, 95% CI, -2.1, 12.1, I2=n/a, p=0.17; see Online Supplement Figure 72) and was not changed during left-lateral rest following supine exercise (MD= -1.0, 95% CI, -7.8, 5.8, I2= n/a, p=0.77; see Online Supplement Figure 73).18 This study also included a supine baseline which was not included in the pooled analysis; details can be found in Table 1.18

#### The effects of chronic exercise on resting uterine blood flow measurements

##### Uterine artery S/D

There was “moderate” quality evidence from one superiority trial (n=60 women; downgraded from “high” to “moderate” due to serious inconsistency) which reported that resting uterine artery S/D ratio was lower in the yoga group compared to the walking group (MD= -0.40, 95% CI -0.72, -0.08, I2 = 0%, p=0.01, see Online Supplement Figure 74).75

##### Uterine artery PI

There was “low” quality evidence from one RCT (n=59 women; downgraded from “high” to “low” due to serious risk of bias and serious inconsistency) reporting no difference in resting uterine artery PI between groups following an exercise intervention (MD= 0.02. 95% CI -0.10, 0.14, I2= n/a, p=0.75, see Online Supplement Figure 75).80 There was “moderate” quality evidence from one superiority trial (60 women, downgraded from “high” to “moderate” due to serious inconsistency) showing a decrease in resting uterine artery PI by -0.21 in the yoga group compared to the walking groups at the end of the intervention (95% CI -0.41, -0.01, I2 =0%, p=0.04, see Online Supplement Figure 76).75

##### Uterine artery RI

There was “moderate” quality evidence from one superiority trial (60 women, downgraded from “high” to “moderate” due to serious inconsistency) showing a decrease in resting uterine artery artery RI by -0.10 in the yoga group compared to the walking group (95% CI -0.16, -0.04, I2= 0%, p=0.002, see Online Supplement Figure 77).75 Two studies (n=245 women) could not be included in the pooled analysis because they were missing SD,85 or reported unusable values.84 Specifically, one RCT (n=125 women) reported on uterine artery PI at rest before and after intervention it showed no difference in resting uterine PI between exercise and control groups at the end of the intervention85 and one non-randomized intervention (n=120 women) showed no difference in uterine doppler velocimetry score between groups before and after a yoga intervention.84

#### The effects of chronic exercise on uterine artery blood flow metrics response to acute exercise

There were no studies reporting on uterine artery S/D, RI, volumetric blood flow or mean blood velocity response during or following acute exercise sessions post-intervention. There was “moderate” quality evidence (downgraded from “high” to “moderate” due to serious inconsistency) from one RCT (n=59 women) that was narratively summarized (did not report measure in control group) reported a greater decrease in uterine artery PI following acute exercise post-intervention in the exercise group (pelvic floor muscle training; PFMT).80

# Supplementary Tables: Study Characteristics

## Table 1: Study characteristics: Acute exercise sessions

| Author, year, country, study type, study name | Sample size (n) | Age (years) | Complications/ pre-pregnancy PA level | PA Assessment | Definition of PA groups | Time point | Acute exercise session characteristics (FITT) | Results |
| --- | --- | --- | --- | --- | --- | --- | --- | --- |
| Arfi.1986France.Cross-sectional6 | 14 | 25.6 ± 4 | N/A | Objective | Acute exercise session only | 37.9 ± 0.9 weeks | -Cycle ergometer-Resistance increased by 0.5watt/kg every 3 minutes -15.14min average | Data in forest plots |
| Artal et al.1984USACross-sectional.71 | 19 | 27 ± 1 | Moderately active | Self- reported & objective | Women performed one symptom limited VO2max test | 34 ± 3 weeks | -Treadmill-Incremental to maximal (160bpm max) -7.5min average | **Narrative Summary:**  -Case report for three women with fetuses experiencing bradycardia during exercise.  -This paper was identified to potentially have artifact in the FHR measurement during exercise. Therefore, a sensitivity analysis was done removing it from the bradycardia analysis. |
| Artal et al. 1986.  USA.  Cross-sectional.32 | Light: 15 Mod: 15  Strenuous: 15 | - | “Moderately fit with mild exercise group slightly less fit” | Objective | Acute exercise only. Mild, moderate & strenuous exercise sessions. | 34-35 weeks | -Treadmill -mild:15 minutes at 2.3-3.0 METs/2.0mph -moderate: 15 minutes at 5.0-6.0 METs/ 2.0mph @ 10% incline-strenuous: 7.0-9.0 METs/ 2.5mph incline increases 2% every minute to exhaustion (time varied) | **Data in forest plots** |
| Artal et al. 1995.  USA.  Cross-sectional.69 | 7 | 24.86 ± 2.18 | Sedentary. | Objective | All women participated in acute exercise sessions at sea level and at altitude. | 33.86 ± 1 weeks | -Cycle ergometer -Incremental 25W increase 3x5min stages, then increase every 2 minutes until max.  Sea level:  -MHRmax = 167.86; VO2max = 1.39L/min; 167.86 ml/kg/min  High Altitude:  -MHRmax = 161.64; VO2max = 1.21L/min; 164.64 ml/kg/min | **Data in forest plots**. |
| Avery et al. 1997  USA. RCT.67 | E: 15C: 14 | - | No current exercise regime >30 minutes 2x/week.GDM. | Self-reported, objective & LTPA | Women were enrolled in an RCT.  **FITT in Table 2**. | FHR was measured at supervised exercise sessions and bradycardia was reported across all 77 sessions. | -cycle ergometer  -30 minutes  -70% HRmax | **Data in forest plots**. |
| Avery et al.1999 Canada  Cohort15 | 12 | 29 ± 1 | Inexperienced/ Low (according to Health and Lifestyle questionnaire) | Objective & LTPA | Acute exercise session only Each exercise was done sitting and semi-supine | 31 ± 1 weeks | -Resistance Training: handgrip, single-leg extension, double-leg extension. -1 rep max (RM) and 10RM (80% of 1RM) | Data in forest plots |
| Backiuk et al.2008. Brazil.  RCT22 | E: 34 C: 27 | - | Sedentary | Objective & LTPA | Women were enrolled in a RCT.FITT in Table 2. | 19, 25, 35 weeks | -Treadmill -12 minutes  -four 3-min stages:  1) 2.7kph, 0%;  2) 2.7kph, 10%;  3) 4kph, 12%;  4) 5.5kph, 14%  -MHR at peak: 160-180 (fig 3) | Data in forest plots |
| Barakat et al.2008 Spain Cohort 17Barakat et al. 2010.  Spain.  Cross-sectional.79 | 20 | 29.6 ± 4.3 | 18 (90%) were active; 2 were not active (10%) | Self-reported, objective & LTPA | Acute exercise session only Data extracted to plots was at the end of 20 minutes of exercise. | 3rd trimester | -Cycle ergometer -20 minutes  -RPE: 12-14  - “moderate” intensity | **Narrative Summary:**  Mean FHR during exercise was 149 ± 5.91 (FHR increase was 11-36bpm, mean 24bpm)  Pearson correlation of FHR during exercise and gestational age: 006; p=0.803 |
| Baumann et al. 1989.  Switzerland.  Cohort.61 | 13 | - | Untrained | Objective & LTPA | Acute exercise session only. | 38 weeks | -semi-supine cycle ergometer (60º angle for exercise)-3 minutes for 5 trials with rest between to assess each vessel. | **Narrative Summary:**  Data is presented in Table 2 as medians and ranges and cannot be used in plots.  Uterine Artery RI (NSD pre-post)  pre- median 0.40; range 0.27-0.55  post- median: 0.39; range 0.26-0.55  Uterine Artery PI (NSD pre-post)  pre- median 0.64; range 0.48-0.98  post- median 0.69; range 0.40-1.06  Umbilical Artery RI (p<0.01 pre-post)  pre- median 0.59; range 0.46-0.71  post- median: 0.53; range 0.45-0.67  Umbilical Artery PI (p<0.02 pre-post)  pre- median 0.98; range 0.68-1.24  post- median 0.87; range 0.67-1.19  From the text: median FHR before exercise was 133 (range 114 to 166) after exercise also 133 (range 114 to 167). |
| Bgeginski et al.2015. Brazil.  Cohort.52 | 10 | 25.2 ± 4.4 | Sedentary prior to pregnancy. At 22-24 weeks women were not practicing regular exercise in the last three months. | Objective & LTPA | Three separate acute exercise sessions. | 22-24 weeks28-32 weeks 34-36 weeks | -Resistance exercise - bilateral leg extension & pec-deck fly machine  -1 & 3 sets of 15 reps each  -weight at 50% of 1 rep max  -MHR varied (98.7 ± 11.9 to 114.8 ± 17.0). | **Narrative Summary:** As per statistician (NB) recommendation, FHR was determined as the average value from of all four types of activity at each gestational age. Therefore, only three data points are presented in the forest plots. At 28-32 weeks n=6  At 34-36 weeks n=5  **Data in forest plots**. |
| Bonen et al. 1992.  Canada.  Cross-Sectional10 | T2: 6  T3: 8 | - | - | Self-reported & objective | All women were regularly active (2-3x/week) and participated in aerobics classes (n-10) or walking (n=2).Acute exercise sessions included for this study. | 2nd trimester & 3rd trimester | -Cycle ergometer -30 minutes  T2: 67W; 4.1L/min  T3: 78W; 6.4L/min | **Narrative Summary:**  -FHR measures in figure 1 were not possible to extract due to the quality of the image. “FHR did not differ between T2 & T3 at rest, during exercise, or after exercise (P>0.05; Figure 1). Responses in heart rates did not differ over time between the two groups (groups x time, p>0.05)” |
| Bonnin,1997. Finland.  Cohort.41 | 14 | 28 ± 7 | Sedentary prior to pregnancy | Objective & LTPA | Exercise was performed in the sitting position | 36 ± 3 weeks | -Cycle ergometer - 3-9minutes  - incremental; 3minute stages at 60,90 & 120Watts  -peak: 80 ± 8 %HRmax (153 ± 14 bpm) | -Umbilical artery blood flow is also presented as a maximum systolic velocity (extracted from figure 4) At rest: 28.8 ± 3.8  Following exercise (1min): 30.3 ± 5.9 |
| Brenner et al. 1999CanadaNon- randomized Intervention2 | E(T2): 14 E(T3): 14  C: 6 | E: 28.7 ± 3.5 C: 29.3 ± 3.2 |  | Objective & LTPA | Women were enrolled in a non-randomized exercise intervention.FITT in table 2 | 37 ± 1 weeks | -Cycle ergometer-Incremental to RPE 18 or 170bpm -8.9 ± 0.7 minutes average | **Narrative Summary:** We contacted the authors for clarification about differences between table 4 and figure. The values for FHR in table 4 represent and average over 20 minutes. Therefore, for recovery data, we extracted the 1-minute time point from Figure 2. |
| Bung.1993. Germany.  RCT.20 | E: 17 C: 17 | E:38.97 ±1.74 C:38.18 ±2.04 | All women having GDM and requiring insulin | Objective | -Women were enrolled in a RCT. FITT in table 2-Women also performed symptom limited VO2max sessions. | 27-41 weeks | -Semi-reclined cycle ergometer -45 minutes  -50% VO2max | **Data in forest plots**. |
| Carpenter et al. 1988.USA.Cohort14 | 45 | 29.0 ± 3.7 | 21 reported vigorous exercise one or more times per week pre-pregnancy.16 reported regular exercise during pregnancy. | Objective & LTPA | Subjects were studied twice on separate days.One submaximal exercise session and one maximal exercise session. | 25.2 ± 3.0 weeks | Submaximal sessions:-Cycle ergometer-0, 30, and 60W for 6-min each work loadMaximal sessions:-Cycle ergometer-Started at 60 W, increased every 2min to fatigue. | Data in forest plots |
| Chaddha et al. 2005.  Canada.  Case control.65 | Healthy: 23 Complicated: 12 | Healthy:34.4 ± 6.38 Complicated: 29.6 ± 3.2 | Women in the complicated group had uteroplacental insufficiency (uterine artery PI >1.45) | Objective & LTPA | Acute exercise only | 22-26 weeks | -cycle ergometer -5 minutes  -10% & 15% of “maximum” (not defined) | **Data in forest plots**. |
| Clapp.1985. USA.  Cross sectional.33 | 6 | - | - | Objective | Acute exercise only | 20 & 32 weeks | -treadmill -20 minutes  “running” (no speed or grade given) | Data in forest plots |
| Clapp et al.1993 USA  Cohort12 | 120 | - | “well-conditioned women” | Self-reported & LTPA | Women continued to exercise at 50% or more of their pre-conception exercise levels (running or aerobics, ≥3x/week, ≥30 minutes).FITT in table 2 | 33-38 weeks | -Cycle ergometer-60 ± 3% of VO2max-20 minutes | Data in forest plots |
| Clapp et al. 1995  USA  Case Control.66 | E:31C:29 | 31 ± 1 | - | Self-reported & LTPA | Control group exercised until 28 weeks gestation and then discontinued exercise regularly. |  | -Various aerobic (running, swimming, stair machine, aerobics, bicycling)-3 to 6x/week-20 to 60 minutes-50 to 88% VO2max-exercise up until onset of labor with last exercise session occurring within 48 hours of delivery | Narrative Summary:Women in the exercise group were selected at 36-38 weeks gestation based on “an exercise associated increase in FHR >5bpm after regular exercise. "The magnitude of the increase in FHR with maternal exercise ranged between 8-34 bpm" |
| Clapp et al.2000. USA.  RCT.21 | E: 6 C:6 | E: 30 ± 1 C: 31 ± 1 | Pre-pregnancy VO2max (ml/kg/min) E: 42.8 ± 2.7  C: 38.2 ± 2.4 | Objective, Total PA, & LTPA | Women were enrolled in a RCT. Separated based on their pre-pregnancy VO2max and regularly (>3x/ week) vs not regularly exercising. **FITT in table 2** | 15, 26, 37 weeks | -Treadmill -20 minutes  -55% pre-pregnancy VO2max | Data in forest plots |
| Collings et al.1983 USA  Non-randomized intervention3 | E: 12 C: 8 | - |  | Objective & LTPA | Women were enrolled in a non-randomized intervention.FITT in table 2 | unclear | -Cycle ergometer -65-70% VO2, MHR 152  -10 minutes | **Data in forest plots**. |
| Collings et al. 1985.  USA.  Cohort54 | 25 for FHR data n=11 | 25-35 | - | Objective & LTPA | Women were participating in regular exercise program.FITT in table 2 | 28, 32, 34, 36 & 38 weeks | -aerobic exercise (walking, jogging, stationary bike) -10min warm up, 30min aerobics  -68.5% of maximal aerobic capacity | **Data in forest plots**. |
| Cooper et al.1987. Australia.  Cohort55 | 14 | 30 ± 3 | - | Objective& LTPA | Acute exercise session only.Data for FHR was presented as a mean of all six exercise sessions (2T & 3T, at 2,3 & 4 METS). | 21 ± 2 weeks 36 ± 1 weeks | -Treadmill- 10-minutes at each 2,3, & 4 METS (3kph at 0%, 3.5% & 7%) | Data in forest plots. |
| Dale et al.1982. USA.  Cohort56 | E (pro): 12 E (retro): 21 C: 11For FHR data n=4 | Retro: 30 Pro(E &C): 28 | All exercise groups were runners (average 4yrs experience).Control women were non-runners | Self-reported & LTPA | Retrospective:-1T- 14.2 mpw;-2T- 10.9 mpw;-3T- 6.6 mpw;-8 of 21 (38%) competed in races during pregnancyProspective:-1T- 13 mpw;-2T- 12.9 mpw;-3T- 9.2mpw;- 4 of 11 competed in races during pregnancy | 31-38 weeks | -Running -no other information given | **Data in forest plots**. |
| Dressendorfer et al. 1980.  USA.  Cohort13 | 54 | Range: 26-30 | “exercising women with above average CV fitness” | Self-reported & LTPA | Women continued swimming throughout pregnancy (30-45min; 3-4x/week).Completed two acute exercise sessions each. | 32-39 weeks | -Cycle ergometer -Incremental, 150kg-m/min load increases  -Time varied; at least four stages (up to 600kg-m)  -160bpm max | **Narrative Summary:**  Baseline FHR was 142 (range 135-152); FHR during peak exercise was 149 ± 5 bpm. SD not given. |
| Einsenberg de Smoler et al. 1974.  Mexico.  Cross-sectional.39 | 16 | - | - | Objective | Acute exercise session only. | 36 weeks | -Treadmill Variable:  -10 min  -4 stages:  1.7mph/3min; 3.0mph/2min; 4.0mph/2min; 5.0mph/3min  Constant:  -30 min  -2.5mph | **Narrative Summary:**  Variable: rest, 133; post-exercise, 141  Constant: rest, 136; post-exercise, 141  SD not given. |
| Erkkola et al.1992FinlandCohort16 | 8 | 31.4 ± 4.9 | The subjects had not pursued athletics or undertaken any “hard physical training” during pregnancy. | Objective & LTPA | Acute exercise session only. | 36.9 ± 1.1 weeks | -Cycle ergometer -4minutes stages at 73, 114, & 161 watts per stage | Data in forest plots |
| Ertan et al. 2004.  USA.  Cohort.81 | Healthy: 33 Complicated: 10 | - | Complicated pregnancies= IUGR | Objective & LTPA | Acute exercise session only. | 3rd trimester | -Cycle ergometer -10minutes  -1.25W/kg (moderate exercise; mean= 79 ± 11W) | **Data in forest plots**. |
| Ferland et al. 2013.  Canada.  Cohort.88 | 94 PA 0-1: 15  PA 2-4: 36  PA >4: 43 | Subdivided by PA frequency (per month): PA 0-1: 27.7  PA 2-4: 29.2  PA >4: 29.5 |  | Self-reported & total PA | Subdivided by PA frequency (per month): 0-1; 2-4, >4 . | 11-13 weeks | -Resting measures only. | **Narrative Summary:** Uterine artery data presented as a multiple of the median and could not be extracted to plots:Associations between frequency of PA and uterine artery mean PI (MoM) 2-4x/month: B (95%CI):  -0.006 (-0.186 to 0.175), p=0.95  >4x/month: B (95%CI):  0.031 (-0.147 to 0.209), p=0.73  From text: There is a "trend towards decreasing [mean PI] with increasing PA frequency" |
| Golomer et al. 1989.  France.  Cohort.62 | 10 For FHR data n=5 | 28yr 8 month ± 3yr 5 month | - | Unclear | Acute exercise sessions once per month. | 3-8 months | -Walking with or without carrying weights (5kg) -30 meters | **Narrative Summary:**  -FHR data was reported as a range and therefore could not be extracted to the plots.  FHR at rest was 140-160bpm. Following exercise there was no significant increase in FHR (values not reported). |
| Hackett et al. 1992.  UK.  Cohort.89 | Healthy: 12 Normal: 14  Abnormal: 8 | Healthy:27.7 ± 7.2 Normal:  25.1 ±4.7  Abnormal:  25.8 ± 4.6 | None of them had ever been enrolled in a physical training program. | Objective & LTPA | Acute exercise session only. | 3rd trimester | -Cycle ergometer -50 watts  -Duration not given | Data in forest plots |
| Hall et al. 1987.  USA.  Cohort.73 | E(L): 82 E(M): 309  E(H): 61  C: 393 | E(L): 26.2 E(M): 24.5  E(H): 25.2  C: 30.0 | - | Objective & LTPA | Women self-selected into the exercise program. Groups were created based on the number of sessions the women attended (mean 0.8, 15, 32, 64 sessions for control, low, medium, and high exercise groups, respectively). **FITT in table 2.** | 28 & 38 weeks | -Various aerobic, resistance, & stretching  -45 minutes  -85%HRmax; <140bpm | Data in forest plots |
| Hauth et al. 1982.  USA.  Cross-sectional.40 | 7 | - | Active prior to and during pregnancy | Self-reported & Objective | Women routinely jogged ≥1.5 miles, ≥3x/week -Studied before and after one session for this study -15 assessments complete for FHR data (does not say how many per woman) | 28-38 weeks | -Jogging (not treadmill) -12 to 14.5 minutes  -1.5miles | **Narrative Summary:** (FHR):  -FHR data presented as a range and therefore could not be extracted to plots.  Rest: 140-155  Post-exercise: 155-204  **Data in forest plots**. |
| Jeffreys et al. 2008  USA  Cohort18 | 14 | 34 ± 3 | Physically active | Self-reported and LTPA | Women continued regular exercise throughout pregnancy, including supine exercise.FITT in table 2 | 3rd trimester | -left lateral rest, supine rest, supine exercise (abdominal crunches and leg exercise), left lateral recovery -RPE 13-17  -10 minutes | **Narrative Summary:** -Used left lateral rest as baseline for plots. Supine Rest data as follows: FHR: 137 ± 11 Uterine blood flow (ml/min): 267 ± 93 Uterine blood velocity (cm/s): 32 ± 11  Uterine Artery S/D: 2.0 ± 0.6 Data in forest plots |
| Jones et al. 1985.  USA.  Cohort.63 | 4 | - | “aerobically conditioned women” | Self-reported & objective | -Women were all running >4x/week; ≥3miles @ 10min/mile pace or better during their pregnancies. -Studied before and after one exercise session in each trimester for this study. | 24 ± 1 weeks 32 ± 1 weeks | -Running- not on treadmill -30 minutes  -80 to 90% of predicted VO2max | **Narrative Summary:** FHR data was given without SD, therefore could not be extracted to plots. Resting FHR was 132bpm. FHR increased 15bpm above resting values after exercise. |
| Jovanovic et al.1985. USA  Cross sectional7 | 6 | 28.5 ± 1.7 | - | Self-reported a& LTPA | Women exercised throughout pregnancy (jogging, bicycling, other; at least 2x/week; self-reported).Data for acute exercise session only. | 3rd trimester | -cycle ergometer -12.8 ±1.7 min  -79 ± 9Watts | **Narrative Summary:** Potential artifact during exercise, therefore sensitivity analysis was performed removing it from both acute FHR analysis and bradycardia analysis. |
| Kardel et al. 2009.  Norway.  Cohort.  STORK.72 | 59 | 30.3 ± 3.9 | - | Objective & LTPA | Acute exercise session only. | 35-37 weeks | -cycle ergometer-8 to 12 minutes-incremental (increased 10% of predicted max per minute) At peak:  MHR=174 ± 8.5  VO2 (L/min) =2.1 ± 0.3  Work load=171.3± 29.3Watts  RPE=8.6 ± 1.2 | Data in forest plots |
| Katz et al.1988USACohort (Longitudtinal)19 | 12One subject did not participate in 35week assessment | 29.5 | 6 sedentary5 light activity1 moderate activity | Objective | Acute exercise sessions only. | 16 ± 1 weeks 26 ± 1 weeks36 ± 1 weeks | -Cycle ergometer -Incremental exercise was performed beginning at zero workload, with increasing load of 12-25W in 3-minute stages. After reaching 60% of age predicted HR max, subjects pedaled for 3 minutes at that workload | Data in forest plots |
| Katz et al.1990. USA.  Cross sectional.27 | 7 | - | - | Objective | Acute exercise session only. | 25 weeks | Water exercise: -immersed bicycle  -20 minutes  -70% HRmax (1.38l/min)  Land exercise:  -Cycle ergometer  -20 minutes  -70% HRmax (1.40l/min) | Data in forest plots. |
| Kennelly et al.2002. Ireland.  Cohort47 | 22 | 25.96 ± 4.9 | - | Objective | Acute exercise session only. | 30-34 weeks | -Cycle ergometer -incremental (time varied)  -peak at 85.8 ± 4.2% HRmax; 102.3 ± 15.7 Watt; VO2 23.9 ± 5.6 (ml/kg/min) | Narrative Summary:The nadir of the umbilical artery PI was at 5 minutes post exercise. |
| Kennelly et al.2002. Ireland.  Cohort.48 | No: 112 Mild: 119  Mod: 27 | None:25.8 ± 5.6 Mild:  28.4 ± 5.1  Mod:  30.4 ± 4.3 | Varied | Objective & LTPA | Acute exercise session only. FHR combined for all women (not reported based on activity level). | 32-38 weeks | -Cycle ergometer -Incremental exercise; increased by 10W each minute at a constant speed of 50-60rpm. Aim was to reach AT.  -time varied | Data in forest plots. |
| Lindqvist et al. 2003.  Sweden.  Cohort.90 | 14 | 29 ± 5 | Healthy and physically active but not participating in specific exercise programs. | Objective & LTPA | Acute exercise session only. | “Throughout pregnancy” | -Cycle ergometer-85% HRmax-Duration not given | Narrative Summary: “no abnormal FHR tracings” |
| Lotgering et al.1998. Netherlands.  Cohort.64 | 22 | - | Women did not exercise regularly before or during pregnancy | Objective | Acute exercise session only. Data was calculated from median and IQR. | 18-36 weeks | -Cycle ergometer -5 minutes  -75Watt | **Data in forest plots**. |
| Lynch et al.2003 Australia.  Cohort.49 | 23 | 28.7 ± 4 | Sedentary in the first four months of pregnancy. | Self-reported & LTPA | FHR taken before and after supervised exercise sessions (swimming) during a longitudinal study where all women were part of a structured exercise program. **FITT in table 2.** | 16, 20, 24, 28, 32 & 36 weeks | Exercise program:-Swimming -40minutes  -<70%HRmax, <140bpm  Fitness testing:  (16wks only)  -Cycle ergometer  -incremental: initial load 60rpm, no resistance; increase 0.5-1Kp every 3 minutes “depending on exercise history”. | **Data in forest plots** |
| Macphail et al.2000. Canada.  Cohort50 | 23 | 32 ± 4 | All women had a BMI <37 pre-pregnancy and were active throughout pregnancy. | Objective & LTPA | Acute exercise session only. Used data from 10-minute baseline closest to exercise, and first 10-minute recovery. | Range:31-38 weeksMean:35±1.6 weeks | -Cycle ergometer -incremental: 20W for 4min, increased 20W/min to fatigue.  -Peak 184W; MHR 176 ± 6 | Data in forest plots. |
| Manders et al.1997. Netherlands.  Cross-sectional.28 | 12 | 20-36 Median: 29 | None of the women was a conditioned athlete. | Objective. | Acute exercise session only. | 29-32 weeks | -Cycle ergometer -Incremental: initial load of 50W, increased 25W every 5min to maximal exertion, and maintained for 5min at maximal load.  -peak: 53-99% HRmax (mean: 82%)  -15-30min (mean: 20) | **Data in forest plots**. |
| Marsal et al.1979. Sweden.  Cohort.57 | 40 | 18-30 Median: 25 | - | Objective & LTPA | Acute exercise session only. | Range:32-37 weeks Median:  34 weeks | -Bed cycle ergometer -5 minutes  -80Watts | Data in forest plots. |
| McMurray et al.1995 USA  Cross-sectional5 | 10 | 32 ± 5 | Varied. | Objective | Acute exercise session only. Data during exercise was extracted as the last data point during exercise. | 21-28 weeks | -Dance, walking, treadmill -40 minutes  -133-135bpm | Data in forest plots. |
| Moore et al. 1988.  USA.  Cross-sectional.86 | 11 | 26.6 | 8/11 were regular exercisers during their pregnancy (3x/wk; 1hr) | Self-reported & LTPA | Acute exercise session only | 16-28 weeks | -Cycle ergometer-Incremental-60-75%HRmax-up to 20min | Data in forest plots. |
| Morrow et al.1989. Canada.  Cross-sectional.34 | 15 | - | - | Objective | Acute exercise session only. | 36-41 weeks | -Cycle ergometer -5 minutes  -20W | **Data in forest plots** |
| Nabeshima et al.1997 Japan.  Cross-sectional.29 | Healthy: 17 Complicated:7 | - | Complication= IUGR- not extracted | Objective | Acute exercise session only. | 36-42 weeks | -Treadmill -Incremental: 3kph, increase every 3min (4 stages: 0, 15, 20, & 25%).  -peak MHR: 150bpm  -4-15min (mean: 8.8± 2.8) | Data in forest plots. |
| Nesler et al. 1988.  USA.  Cross-sectional.9 | 2T: n= 123T: n= 13 | - | “healthy, regularly exercising women” | Self-reported  & Objective | Participants all participated in a YMCA pregnancy fitness program (no details given). | 2T: 24-28 weeks3T: 32-36 weeks | -Supine abdominal exercises-5 minutes | **Narrative Summary:** FHR data is described as “percent maximal pulse” at rest and during exercise. 24-28weeks  max (rest): 40 +/-5  max (EX): 46 +/-5  32-36weeks  max (rest): 40 +/- 29  max (EX): 49 +/-6 |
| O’Neill et al.1996, Australia.  Cohort.43 | 11 | 30.3 ± 3.3 | -5 sedentary -2 somewhat active  -4 “trained” | Objective & LTPA | All women performed three acute exercise tests (A, B & C).Test C includes 15min of exercise (Test B), up to 15min rest, and then an additional 15min exercise (Test C) all on the same day. Therefore, the baseline for test C and B are the same. | 34-37 weeks | Test A: -cycle ergometer  -15 minutes  -MHR 138; 62.5W  Test B:  -cycle ergometer  -15 minutes  -MHR 156; 87.5W  Test C:  -cycle ergometer  -30min total  -MHR 142; 87.5W | **Data in forest plots**. |
| O’Neill et al.1991 Australia.  Cohort.42 | study n= 21For FHR data:MHR<140bpm: 10 MHR>140bpm: 8 | MHR<140bpm 28.9 ± 4.2  MHR>140bpm 27.9 ± 4.6 | Varied. | Objective | Acute exercise session only. | 34-38 weeks | MHR<140bpm  -Cycle ergometer  -Incremental (time varied)  -HRpeak <140bpm  MHR>140bpm  -cycle ergometer  -incremental (time varied)  HRpeak >140bpm | Data in forest plots. |
| O’Neill, et al.2006. Australia.  Cohort.44 | Semi-supine: 27Upright: 23 | Group 1:30 ± 5 Group 2:  30 ± 4 | Group 1:  19% trained, 59% sedentary  Group 2:  22% trained, 65% sedentary | Objective & LTPA | Acute exercise session only. | 34-36 weeks | Group 1:-semi-supine (45º) cycling -12 minutes  -resistance increased until MHR was 135-145bpm  Group 2:  -upright cycling  -10 minutes at MHR 135-145 | Data in forest plots. |
| Paolone et al. 1987  USA  Cross-sectional8 | 4 | 28 | - | Objective | Three acute exercise sessions. | 30-37 weeks | -Treadmill: 1.5-2.0mph -Cycle: 50,60,70rpm  -5 minutes | Narrative Summary:For the treadmill exercise, we use the pre-exercise sitting values for extraction because the recovery position was also sitting. The standing, resting FHR values were 140 ± 3.6 |
| Perales et al.2015. Spain.  RCT.23  NCT 01723293 | E: 38 C: 25 | 31.9 ±3.2 | - | Objective & LTPA | All Women were participating in a RCT.FITT in table 2 | 34.08 ± 2.27 weeks | 40% HRR-walking-3minutes60% HRR-walking-3minutes | Data in forest plots |
| Pijpers et al.1984 Netherlands  Cross-sectional.35 | E: 14C: 14FHR data from n=11 (all from exercise group | 26.1 Range:  22-29 | All nulliparous women | Objective | Women performed two sequential exercise sessions separated by a rest period. Women in the control group did not exercise. | Range:34-38 weeks Mean:  35.6 weeks | Stimulus 1 (period III) & Stimulus 2 (period VIII): -bed-type cycle ergometer  -5 minutes  -25W stimulus 1 & 2 are extracted as separate sessions in plots. | **Data in forest plots**. |
| Polis et al.2015. USA.  Cohort.53 | E(1): 10 E(2): 8  E(3): 7 | All: 31.7± 3.1 E(1):32.2±3.4  E(2):30.3±2.0  E(3):32.7±3.5 | E(1): regular yoga practiceE(2): yoga familiarE(3): no yoga experience | Self-reported & Total PA | Acute exercise session only | 35-38 weeks | -Yoga (26 postures)-110-115minutesIntensity/inclusion:-SBP <200mmHg-MHR<HRmax (220-age)-SaO2>94%-FHR110-160–no uterine contractions | Data in forest plots |
| Pomerance et al. 1974  USA  Cohort.58 | 54 | - | Pre-pregnancy weight between 100-169lbs | Objective | Acute exercise session only. | 35-37 weeks | -Cycle ergometer | Narrative Summary:Definition of bradycardia was not consistent with clinical definitions (<110bpm), and data from paper shows that FHR did not decrease below 110bpm, therefore instances of bradycardia reported in this paper were not included in bradycardia analysis. |
| Rafla & Beazely, 1991.  UK.  Cross-sectional.70 | 21 | - | - | Objective | Acute exercise session only. | 3rd trimester | -Cycle ergometer -5 minutes  -70% of submaximal exercise | **Data in forest plots**. |
| Rafla & Cook. 1999.  UK.  Cross-sectional.38 | 193 | Range: 16-38 | UncomplicatedThis study recruited 44 “high risk women” including 9 women with diabetes, 18 with IUGR and 17 with unspecified hypertensive disorders not used in the analysis. | Objective | Acute exercise session only. | 3rd trimester | -Cycle ergometer -5 minutes  -70% of submaximal exercise | **Data in forest plots**.  **Narrative Summary (FHR):**  SD and p-values not given for FHR, so could not be included in forest plots.  Rest: 143  Recovery: 143.4 |
| Rafla & Etokowo. 1998.  UK.  Cross-sectional.87 | 102 | Range: 17-38 | -78 women “involved in active sports”-24 women“not involved in active sports” | Objective | Acute exercise session only | 25-39 weeks | -Cycle ergometer -5 minutes  -67.2% (range: 51-90) | **Data in forest plots**. |
| Rafla et al. 1999.  UK.  Cohort.82 | 143 | 25.5 | “healthy” | Objective & LTPA | Acute exercise session only | 3rd trimester | -Cycle ergometer -5 minutes  -MHR 116-200bpm; mean= 144bpm  -55-90%VO2max | Data in forest plots. |
| Rakhshani et al. 2015.  India. RCT.75 | yoga: 27walking: 31 | yoga:27.2 ± 4.8walking:27.5 ±5.5 | All “high-risk pregnant women” none experiencing PE, 3 had PIH. | Self-reported, objective & LTPA | Women were enrolled in an exercise intervention (RCT) where one group attended yoga classes while the other group walked on their own. **FITT in table 2.** | 12, 20, & 28 weeksOnly uterine artery SD, RI & PI have measures at 12 weeks, all other measures done at 20 & 28 weeks only. | Exercise group:-Yoga -60 minutes  Control group:  “conventional antenatal exercises; walking” | **Data in forest plots**. |
| Rauramo et al.1987. Finland.  Cohort.59 | Healthy: 38 Diabetes: 11  n varied following exercise: Healthy, n=31 Diabetes, n=8 | Healthy:27 ± 3 Diabetes:  27 ± 5 | The other two groups were women with preeclampsia (n=13) and women with cholestasis (n= 9) not included in the analysis. | Objective & LTPA | Acute exercise session only.FHR data was extracted for the first timepoint following exercise only. | 32-40 weeks | -Cycle ergometer -submaximal  Healthy:  -MHR peak =152 ± 12  Diabetes:  -MHR peak =149 ± 6 | -**Data in forest plots**. |
| Roldan et al.2015. Spain.  RCT.24 | E: 25 C:20 | - | - | Objective & LTPA | Women were enrolled in an exercise intervention (RCT). They performed one acute exercise session in which FHR was measured in the third trimester. **FITT in table 2** | 34-36 weeks | -Treadmill -40% and 60%  -3 minutes each stage | **Data in forest plots**. |
| Ruissen et al1990 Netherlands  Cross-sectional.30 | 23 | 28.8 | - | Objective | Acute exercise session only. | 14-37 weeks | 20 deep knee bends No other information given. | Data in forest plots. |
| Shilpa et al.2016. USA.  No intervention RCT.25  “TRY YOGA” | E: 23 C: 23 | E: 25.5 ± 4.4 C: 25.4 ± 4.6 | No previous yoga experience | Objective & LTPA | Women were enrolled in a “RCT” however only one acute session was performed. | 28-37 weeks | -Yoga -60 minutes  -23 postures Women in the control group watched a PowerPoint presentation on exercise and nutrition during pregnancy in the seated position for 60-minutes. | **Data in forest plots**. |
| Sibley et al. 1981.  USA  RCT.1 | E: 7C: 6 | 25.5 ± 3.6 | Varied egress of fitness and ability | Objective & LTPA | Women were enrolled in a RCT. FITT in Table 2 | 13-36 weeks. | -Swimming-60minutes-MHR 110-163 | Narrative Summary:-Data has no SD and no control group to compare to for FHR data, therefore could not be extracted to plots. “Actual fetal heart rate values in beats per minute for the conditioning program ranged from 133 - 155 prior to exercise, from 140- 187 during exercise, and from 137-160 at 5 min of recovery.” |
| Silveira,2010. Brazil.  Non-RCT intervention.26 | 133 | ≤19: 9 20-24: 23  25-219: 57  30-34: 29  ≥35: 15 | Sedentary | Objective & LTPA | Women were enrolled in a non-randomized intervention. **FITT in Table 2** | 24-27 weeks28-31 weeks32-35 weeks36-40 weeksWomen are included in more than one range. Number of sessions for each woman is 1.8 | -Aqua aerobics -50 minutes  -60 to 90% HRmax | Data in forest plots. |
| Sorensen et al.1986 Denmark.  Cross-sectional.37 | 22 | Range:17-37 Median: 24 | Sedentary | Objective | Acute exercise session only.Data was calculated from median and IQR | 18-36 weeks | -Cycle ergometer -5 minutes  -75W | **Data in forest plots**. |
| Steegers et al.1988 Netherlands.  Cross-sectional.36 | 20 | 25 ± 4 | Had not taken part in exercise programs before or during pregnancy | Self-reported & Objective | Two acute exercise sessions on the same day.FHR baseline was taken before both treadmill sessions and FHR post-exercise was taken after the second 10-minute treadmill session. The time between (rest) was not given. For subgroup analysis 10 minutes of exercise was used. | 34 ± 2 weeks | Treadmill 1: -incremental to 130bpm (equivalent to 65% HRmax; 50% VO2max)  -time varied  Treadmill 2:  -10 minutes at 130bpm | **Data in forest plots**. |
| Szymanski et al.2012. USA.  Cross-sectional.31 | Inactive: 15 Regularly active: 15  Highly active: 15 | Inactive: 32.9 Regularly active: 34.3  Highly active: 32.9 | Inactive group was sedentary before pregnancy.Groups defined according to activity in last 6 months (includes pre-pregnancy): Inactive defined as < 20min 3x/week;Regularly active defined as mild-moderate activity 20min 3x/week; Highly active (mostly runners) defined as vigorously active >3x/week | Self-reported & LTPA | Acute exercise session only. | 30 weeks | -Treadmill-Incremental: warm-up at 3.0 mph and 0%, then incline increased 2% every 2min. At 12%, speed increased 0.2 mph every 2min -Time to volitional fatigue: Inactive: 12.1 ± 6 min Regular: 16.6 ± 3.4 min  Highly: 22.3 ± 2.9 min | **Data in forest plots.** |
| Tufnell et al. 1990  UK  Cohort11 | AGA: 50 SGA: 20 | - | - | Objective & LTPA | Acute exercise session only. | 35-40 weeks | -Up/down 30 flights of stairs -10 minutes  - moderate | Narrative Summary:The FHR responses after "warming" were not included in the plots and are:Resting, AGA: 143 ± 9.9; SGA: 139.7 ± 5.4. During exercise, AGA: 151.1 ± 6.3; SGA: 137.2 ± 12.2.Following exercise, AGA: 143.2 ± 10.1; SGA: 139.4 ± 7.8 |
| Van Doorrn et al.1993. Netherlands.  Cohort.45 | 33 | 30.9 ± 0.7 | - | Objective & LTPA | Acute exercise session only. | 16.1 ± 1.0 weeks25.3 ± 0.7 weeks35.0 ± 0.6 weeks | -Cycle ergometer -Incremental: 3minute at 30W, followed by a 10W increase every 30s to maximal.  -MHR max = 174 ± 2  -Time varied | Data in forest plots. |
| Van Leeuwan et al. 2014  USA.  Cross-sectional.91 | E: 21 C: 19 | Range:20-35 | 21 exercised regularly (criteria for assignment to exercise group) | Self-reported & LTPA | MPAQ used to assign groups to exercise or control. Women in the exercise group exercised regularly (at least 30min 3x/week). | 36 weeks | -Sitting- slightly reclined -18 minutes  -Rest | Narrative Summary:FHR was only determined at rest and was therefore not included in the plots. |
| Vega et al.2011. Germany.  Cohort.51 | 20 | 35.2 ± 3.6 | - | Objective & LTPA | Acute exercise session only. | 32-36 weeks | -Cycle ergometer -Incremental: 25W increase every 2 minutes to 150bpm (RPE 16 ± 0.9).  -Time varied | Data in forest plots. |
| Veille et al.1985. USA.  Cohort.60 | Walking: 10 Cycle: 10 Total women n=17. | 31 ± 1 | 95% exercised pre-pregnancy | Self-reported & Objective | Acute exercise session only | Range:32-40 weeks Mean:  35 ± 2 weeks | Group 1: -walking on track  -10 to 15minutes  Group 2:  -cycle ergometer  -10 to 15 minutes  -50W | Data in forest plots. |
| Veille et al. 1989.  USA.  Cohort.74 | 18 | 29.4 ± 3.7 | 15 women active pre-pregnancy and continued to exercise regularly throughout pregnancy. | Self-reported & objective. | Acute exercise session only. | 28.4 ± 6.3 weeks | -cycle ergometer -150kpm increase every 3min to 85% HRmax  -time varied | Data in forest plots |
| Watson et al. 1991  USA  Cohort.46 | 13 | 30 Range:  24-34 | Not participating in organized exercise program. | Objective | Acute exercise session only | 25 & 35 weeks | -Tethered swim: weight was added to provide resistance, 3 min swim at each resistance with 1 min break between-Cycle ergometer: increasing resistance by 25W every 3 minutes until volitional maximum. | Narrative Summary:Definition of bradycardia was not consistent with clinical definitions (<110bpm), and data from paper shows that FHR did not decrease below 110bpm, therefore instances of bradycardia reported in this paper were not included in bradycardia analysis. |
| Webb et al, 1994.  Canada.  Non-randomized intervention4 | E: 22 C: 16 | E: 30.2 ± 0.9 C: 29.1 ± 0.9 | Previously sedentary women “not regularly participating in recreational or occupational physical activity” | Self-reported & Objective | Women were enrolled in a non-randomized intervention. Participation in the exercise program (exercise group) was voluntary (self-selected) **FITT in Table 2.** | 28 ± 1 weeks 37 ± 1 weeks | -Upright cycling -15 minutes  -145 to 150bpm | Data in forest plots. |

**Abbreviations:** AT, anaerobic threshold; AGA, average for gestational age; BMI, body mass index; bpm, beats per minute; C, control group; E, exercise group; FHR, fetal heart rate; FITT, frequency, intensity, timing, type; GDM, gestational diabetes mellitus; HR, heart arte; IQR, interquartile range; IUGR, intrauterine growth restriction; LTPA, leisure time physical activity; MET, metabolic equivalent; MoM, multiple of the median; MHR, maternal heart rate; mpw, miles per week; PA, physical activity; PE, preeclampsia; PI, Pulsatility index; PIH, pregnancy induced hypertension; RCT, randomized controlled trial; RI, resistance index; RPE, rating of perceived exertion; SD, standard deviation; S/D, systolic diastolic ratio; SGA, small for gestational age; UmbA, umbilical artery; UtA, uterine artery; VO2, velocity of oxygen (measure of oxygen use); W, watts; 2T, second trimester; 3T, third trimester

## Table 2. Study characteristics: Exercise interventions/ chronic exercise studies

| Author, year, country, study type, study name | Sample size (n) | Age, years | Complications/ pre-pregnancy PA level | PA Assessment | Exercise Intervention (FITT) | Intervention start point & length | Compliance | Outcomes (Including Narrative Data) |
| --- | --- | --- | --- | --- | --- | --- | --- | --- |
| Artal et al. 2007  USA. Non-RCT intervention.68 | E: 39 C: 57 | E: 32.4 ± 5.3 C: 30.6 ± 5.5 | -Overweight/ Obese-GDM.-Not taking insulin. | Objective & LTPA | -7x/week-cycle ergometer-semi-self-enrollment into groups -1x/week supervised | Start:>GDM diagnosis(<33wk) Length:  unclear | 50% >150min/ week. -30/39 women regularly exercised (153min/wk on average). | Narrative Summary:-Co-intervention (Diet) -Data was unable to be extracted to plots because it was unclear (“abnormal tracings” not defined).  -If women were prescribed insulin, they were dropped from the study. |
| Avery et al. 1997  USA.  RCT.67 | E: 15 C: 14 | - | No current exercise regime >30 minutes 2x/week. GDM. | Self-reported, objective & LTPA | Supervised -2x/week  -cycle ergometer  -30 minutes  70% HRmax  Self-Reported  -1 to 2x/week  -walking  -70% HRmax | Start:>GDM diagnosis (<34wk)  E: 28.7 ± 3.0 weeks  C: 26.3 ±8.1 weeks  Length:  Remainder of pregnancy | Not reported. | **Data in forest plots.**  **Narrative Summary:**  Bradycardia was reported for 77 exercise sessions. |
| Brenner et al. 1999.Canada.Non-RCT Intervention.2 | E(T2):14 E(T3):14 C: 6 | E: 28.7 ± 3.5 C: 29.3 ± 3.2 | - | Objective & LTPA | -3x/week -140-150bpm (70% HRmax)  -15-25minutes  -Aerobic (cycle ergometer) & muscular conditioning  -Supervised | Start:18-20 weeks Length: unclear | -attendance to classes-self reportedE(T2): 82±47  E(T3): 74% | Data in forest plots |
| Backiuk et al. 2008.  Brazil  RCT.22 | E: 34 C:27 | - | Sedentary | Regular, moderate practice or water aerobics. | - 3x /week -70% HRmax  -50 minutes -Water aerobics - Supervised | From first assessment to delivery | Author contacted- no reply | Data in forest plots |
| Bung.1993. Germany. RCT.20 | E: 17 C: 17  FHR in exercise group only | E:38.97 ±1.74C:38.18 ± 2.04 | All women having GDM and requiring insulin | Objective | -3x/week-Semi-reclined cycle ergometer -45 minutes (3x 15min stages interspersed with 5min rest)  -50% VO2max (varied)  -supervised | Start: unclear.(after GDM diagnosis) Length: unclear | Author contacted- no reply | Data in forest plotsNarrative Summary:Data for FHR is from before and after the 45-minute exercise sessions at 50% of VO2max. Symptom limited VO2max tests were performed every 3-4 weeks and target workload adjusted |
| Clapp et al. 2000.  USA.  RCT.21 | E: 6 C: 6 | E: 30 ± 1C: 31 ±1 | Pre-pregnancy VO2max (ml/kg/min) E: 42.8 ± 2.7 C: 38.2 ± 2.4 Women were recruited from a larger RCT (no reference given). | Objective, Total PA, & LTPA | -Randomized to perform either aerobics, treadmill, or stair-stepping at ≥55% pre-pregnancy VO2max-4 to 6x/week -40 to 60min  -unclear if supervised or not | Start: pre-conception Length: unclear | Author contacted- no reply | Data in forest plots. |
| Collings et al.1983 USA Non-randomized intervention3 | E: 12C: 8 | - | - | Objective & LTPA | -3x/week-50-70% VO2max-cycle ergometer-40minutes-supervised | Start: 22.5weeksLength:7-9 weeks (mean 13.4) | - | Data in forest plots.Narrative Summary: FHR at rest, during, and following exercise post-intervention could not be included in plots because it had no control group and combined data for both pre-and-post-intervention timepoints. From text (with respect to exercise testing): “FHR remained well within the normal range of 120-160bpm)” |
| Collings et al. 1985.  USA. Cohort.54 | 25 | 25-35 | - | Objective & LTPA | -3x/week -aerobic exercise  -intensity & time not given  -supervise  -FHR data extracted for acute exercise sessions only (see Table 1). | Start:13-18 weeks Continued until 38wks | - | **Data in forest plots.** |
| de Oliveria Melo et al. 2012.  Brazil.  RCT.85  NCT00641550 | E(13):62 E(20):62  C:62 | E(13):24 ± 5.8 E(20):  26 ± 5.3  C:  24 ± 5.4 | Sedentary at study admission (13&20w) | Objective & LTPA | -3x/week -60-80% HRmax; RPE 12-16  -start at 15minutes, increased over time (varied by person).  -walking  -supervised | Start:13 or 20 weeks Length:  Continued to 38 weeks | >85% for both groups. attendance taken | Narrative Summary:Data was extracted from Figures 3A & 3C, however did not have SD and therefore could not include in plots. **-UmbA PI- 13/20 weeks rest:**  E(13): 1.18002; E(20): 1.202985; C: 1.198815  **-UmbA PI- 38 weeks rest:**  E(13): 0.8339895; E(20): 0.8663465; C: 0.8230285  **-UtA PI- 13/20 weeks rest:**  E(13): 1.59764; E(20): 1.56627; C: 1.60472  **-UtA PI -38 weeks rest:**  E(13): 0.662732; E(20): 0.648567; C: 0.702192 |
| E-Mekawy et al. 2012.  Egypt.  RCT.83 | E: 20C:20 | Range: 25-32 | Women had pre-existing diabetes (type 2) before pregnancy. All receiving insulin therapy | Objective | -3x/week-cycle ergometer-60% HRmax-30minutes-supervised | Start:20 weeksLength:16 weeks | Author contacted- no reply | **Data in forest plots.** |
| Gustafson et al. 2011.  USA. Cohort.76 | E: 24C: 27for FHR data n=15 per group | - | - | Self-reported & LTPA | -3x/week - aerobic exercise  -moderate to vigorous  ≥30 minutes | N/A FHR was taken at rest | -Self-reported-Based on MPAQ | Narrative Summary:FHR taken during breathing & apnea, both extracted.Data in forest plots |
| Hall et al. 1987.  USA. Cohort.73 | E(L): 82 E(M): 309  E(H): 61 C: 393 | E(L): 26.2 E(M): 24.5  E(H): 25.2 C: 30.0 | - | Objective & LTPA | Self-selected exercise groups based on number of sessions attended. Control: 0-10  Low: 11-20  Medium: 21-59  High: 60-99  Sessions consisted of:  -45 minutes  -85%HRmax; <140bpm  -Various aerobic, resistance, & stretching  -Supervised | Start: Unclear  Length:  Continued to 38 weeks | Separated into groups based on compliance (# of classes attended). |  |
| Lynch et al.2003 Australia. Cohort.49 | 23 | 28.7 ± 4 | Sedentary in the first four months of pregnancy. | Self-reported & LTPA | -3x/week-Swimming -40minutes  -<70%HRmax, <140bpm  -supervised  FHR measures made at separate session. Details in **Table 1.** | Start:16 weeksLength: continues to 28- 36weeks | 100% attendance | Data in forest plots.Narrative Summary: No control group to compare to. From text: “The mean fetal heart rates decreased with advancing gestational age”.  FHR pre-intervention: 152 ± 10  FHR post-intervention: 136 ± 13 |
| Narendran et al. 2005.  India. Non-RCT intervention. | Yoga:68Walking: 52 | Yoga:26.5 ± 3.9Walking:26.8 ± 4.6 | - | Self-reported & LTPA | Yoga:-7x/week-60minutesWalking-2x/day-30minutes-Doppler values at rest only. | Start:18-20 weeksLength: continued to delivery | “Compliance was ensured by frequent telephone calls and strict maintenance of an activity diary.”Values not given. | Narrative Summary:“control group” was advised to walk 30 minutes twice per day during the study period. Therefore, could not be considered a non-exercise control. |
| May et al. 2010.  USA. Cross-sectional.77 | E: 26C: 35 | E:29.0±4C:29.6±4 | - | Self-reported & LTPA | Women were regularly exercising (>30minutes of aerobic exercise, 3x per week). | N/AFHR was taken at rest. | -Self-reported-Based on MPAQ | Narrative Summary:FHR taken during fetal active and quiet states at rest, both extracted. **Data in forest plots.** |
| May et al. 2014.  USA.  Cohort.78 | 40 | Range: 23-39 | - | Self-reported & LTPA | Women separated into two groups based on MPAQ data:Continuous LTPA:-e.g. walking or jogging-133.6(127.3) minNon-continuous LTPA:-e.g. weight lifting or yoga-51.8(70.5) min | N/AFHR was taken at rest at 36 weeks | -Self-reported -Based on MPAQ | **Narrative summary:**  Zero order correlation between FHR and minutes of LTPA performed by mothers in three-months preceding the 36-week gestational age point  Continuous LTPA: -0.07 (NSD)  Non-continuous LTPA: -0.34 (p<0.05)  Associations between FHR and minutes of LTPA:  Continuous LTPA: β, 0.054, t-value, 0.35 (NSD)  Non-continuous LTPA: β, -0.248, t-value, -0.162 (NSD) |
| Okido et al. 2015BrazilRCT.80 | E: 26C: 33 | E: 23.41 ± 5.31 C: 23.38 ± 4.79 | - | Objective & LTPA | -2-7x/week-10 sets of maximum pelvic floor muscle contractions held for 6–8 s followed by three fast contractions.-repeated in four different positions in the following sequence: left lateral decubitus, sitting, four arm supports, and standing.-approximately 20 min.-supervised | Start: 18-20 weeksLength: 10 weeks | =84.6% attendance at supervised sessions | **Data in forest plots.**  **Narrative summary:**  Uterine and umbilical artery PI from pre-following acute exercise was not reported in the control group post-intervention.  Pre-intervention  Umbilical PI rest: 1.10 ± 0.1  Umbilical PI following exercise: 1.14 ± 0.13  Uterine PI rest: 0.68 ± 0.17  Uterine PI following exercise: 0.69 ± 0.28  Post-Intervention  Umbilical PI rest: 0.91 ± 0.19  Umbilical PI following exercise: 0.90 ± 0.18  Uterine PI rest: 0.69 ± 0.28  Umbilical PI following exercise: 0.60 ± 0.16 |
| Perales et al.2015. Spain.  RCT.23 NCT 01723293 | E: 38C: 25 | 31.9 ±3.2 | - | Objective & LTPA | -3x/week-55-60minutes total/session -7 to 8 minutes warm up-aerobic dance for 25-30 minutes at 55-60% HRR-10 minutes of pelvic floor muscle training–average BORG 12.2-Supervised.FHR was measured at acute session at 34 weeks (see Table 1). | Start:9-12 weeksLength:To end of 3rd trimester. 38-40 weeks | >80% adherence to program | **Data in forest plots.** |
| Rakhshani et al. 2015.  India.75  RCT. | yoga:27 walking: 31 | yoga:27.2 ± 4.8 walking: 27.5 ±5.5 | All “high-risk pregnant women” none experiencing PE, 3 had PIH. | Self-reported, objective & LTPA | Yoga & breathing - 60 minutes  -3x/week  -supervised  Walking  -30 minutes  -7x/week  -unsupervised | Start:12 weeks Length:  16 weeks | yoga: 79% 41% drop out  27 analyzed  walking: 100%  32% drop out | Data in forest plots. |
| Roldan et al.2015. Spain. RCT.24 | E: 25C:20 | - | - | Objective & LTPA | -3x/week-Combination of resistance training, aerobics, and PFMT -155 to 180min/week  -supervised | Start:10-15 weeks Length:  38-39 weeks; 80 sessions | 100% of women attended at least 80% of classes. | Data in forest plots. |
| Sibley et al. 1981.  USA  RCT.1 | E: 7 C: 6 | 25.5 ± 3.6 | Varied egress of fitness and ability | Objective & LTPA | -3x/week-Swimming -60 minutes  -MHR 110-163  -Supervised. | Start:13-26 weeks Length:  10 weeks | Emailed author. No reply. | Data in forest plots.Narrative Summary:-Data has no SD and no control group to compare to for FHR data, therefore could not be extracted to plots. “Actual fetal heart rate values in beats per minute for the conditioning program ranged from 133 - 155 prior to exercise, from 140- 187 during exercise, and from 137-160 at 5 min of recovery.” |
| Silveira,2010. Brazil. Non-RCT intervention.26 | 133 | ≤19: 9 20-24: 23  25-29: 57  30-34: 29 ≥35: 15 | Sedentary | Objective & LTPA | -Water aerobics -50 minutes  -60 to 90% HRmax  -supervised  -frequency not given | Unclear | Unclear | Data in forest plots. |
| Webb et al, 1994.  Canada. Non-RCT intervention.4 | E: 22C: 16 | E: 30.2 ± 0.9C: 29.1 ± 0.9 | Previously sedentary women “not regularly participating in recreational or occupational physical activity” | Self-reported & Objective | -Self-selection into exercise group -3x/week  -upright cycling  -70% HRmax  - increased from 14 to 25 minutes in 2T; constant at 25 minutes in 3T  -supervised group classes | Start:2nd trimester Length:  20 weeks | -Attendance to classes-Instructor monitored2T: 82 ± 2% 3T: 76 ± 3% | Data in forest plots. |

**Abbreviations:** bpm, beats per minute; C, control group; E, exercise group; FHR, fetal heart rate; FITT, frequency, intensity, timing, type; GDM, gestational diabetes mellitus; HR, heart rate; LTPA, leisure time physical activity; MHR, maternal heart rate; PA, physical activity; PE, preeclampsia; PFMT, pelvic floor muscle training; PI, Pulsatility index; PIH, pregnancy induced hypertension; RCT, randomized controlled trial; SD, standard deviation; UtA, uterine artery; UmbA, umbilical artery; VO2, velocity of oxygen (measure of oxygen use); 2T, second trimester; 3T, third trimester

# Supplementary Tables: GRADE analysis

## Fetal heart rate during exercise

### Online Supplement Table 3: The association between prenatal exercise and fetal heart rate response from before to during exercise.

| **Quality assessment** | | | | | | | **№ of participants** | **Effect** | | **Quality** | **Importance** |
| --- | --- | --- | --- | --- | --- | --- | --- | --- | --- | --- | --- |
| **№ of studies** | **Study design** | **Risk of bias** | **Inconsistency** | **Indirectness** | **Imprecision** | **Other considerations** | **Acute Prenatal Exercise** | **Relative (95% CI)** | **Absolute (95% CI)** |
| Association between prenatal exercise and fetal heart rate response from before to during exercise. | | | | | | | | | | | |
| 19 (pooled estimate of effect, n=15a; 4 studies synthesized narratively) | observational studies | not serious b | serious c | not serious | not serious | none | 291 | - | MD **6.35 higher** (2.3 higher to 10.41 higher) | ⨁◯◯◯ VERY LOW | CRITICAL |
| Narrative synthesis: Four studies were included (n=57). Three studies reported an increase in fetal heart rate from before to after an acute bout of exercise.1 9 13 In contrast, Bonen et al.10 indicated that fetal heart rate did not differ between trimesters during exercise. | | |

**CI:** Confidence interval; **MD:** Mean difference; **OR:** Odds ratio

#### Explanations

a. Eight studies reported data on different sub-groups of women. These studies were only counted once.

b. No serious risk of bias. Reporting bias was an issue in 4 studies (results were narratively reported).

c. Serious inconsistency. High heterogeneity (I2 >50%).

## Fetal heart rate following exercise

### Online Supplement Table 4: Association between prenatal exercise and fetal heart rate from before to after exercise.

| **Quality assessment** | | | | | | | **№ of participants** | **Effect** | | **Quality** | **Importance** |
| --- | --- | --- | --- | --- | --- | --- | --- | --- | --- | --- | --- |
| **№ of studies** | **Study design** | **Risk of bias** | **Inconsistency** | **Indirectness** | **Imprecision** | **Other considerations** | **Acute prenatal exercise** | **Relative (95% CI)** | **Absolute (95% CI)** |
| Association between prenatal exercise and fetal heart rate from before to after exercise. | | | | | | | | | | | |
| 65 (pooled estimate of effect, n=54g; 11 studies synthesized narratively) | observational studies | not serious o | serious a | not serious | not serious | none | 1494 | - | MD **4.05 higher** (2.98 higher to 5.12 higher) | ⨁◯◯◯ VERY LOW | CRITICAL |
| Narrative synthesis: Eleven studies were included (n=360). Eight studies demonstrated an increase in FHR 1 9 13 38-40 63 66 and three studies report no change in FHR 10 61 62 following acute exercise. | |
| Subgroup analysis: Association between prenatal exercise and fetal heart rate response from before to after aerobic exercise alone. | | | | | | | | | | | |
| 48 i | observational studies | not serious | serious a | not serious | not serious | none | 1388 | - | MD **4.41 higher** (3.28 higher to 5.54 higher) | ⨁◯◯◯ VERY LOW | CRITICAL |
| Subgroup analysis: Association between prenatal exercise and fetal heart rate response from before to after resistance training alone. | | | | | | | | | | | |
| 4 d | observational studies | not serious | not serious | not serious | not serious | none | 58 | - | MD **0.38 higher** (2.26 lower to 3.02 higher) | ⨁⨁◯◯ LOW | CRITICAL |
| Subgroup analysis: Association between prenatal exercise and fetal heart rate response from before to after yoga exercise. | | | | | | | | | | | |
| 2 c | observational studies | not serious | not serious | not serious | not serious | none | 48 | - | MD **0.17 lower** (2.82 lower to 2.49 higher) | ⨁⨁◯◯ LOW | CRITICAL |
| Subgroup analysis: Association between prenatal exercise in the second trimester and fetal heart rate response from before to after exercise. | | | | | | | | | | | |
| 15 j | observational studies | not serious | serious a | not serious | not serious | none | 236 | - | MD **2.01 higher** (0.21 higher to 3.8 higher) | ⨁◯◯◯ VERY LOW | CRITICAL |
| Subgroup analysis: Association between prenatal exercise in the third trimester and fetal heart rate response from before to after exercise. | | | | | | | | | | | |
| 49 k | observational studies | not serious | serious a | not serious | not serious | none | 1244 | - | MD **4.61 higher** (3.36 higher to 5.86 higher) | ⨁◯◯◯ VERY LOW | CRITICAL |
| Subgroup analysis: Association between prenatal exercise and fetal heart rate response from before to after exercise in trimester not specified or combined. | | | | | | | | | | | |
| 1 | observational studies | not serious | serious e | not serious | not serious f | none | 14 | - | MD **7.1 higher** (5.69 higher to 8.51 higher) | ⨁◯◯◯ VERY LOW | CRITICAL |
| Subgroup analysis: Association between prenatal exercise and fetal heart rate response from before to after exercise of unspecified duration. | | | | | | | | | | | |
| 11 h | observational studies | not serious | serious a | not serious | not serious | none | 443 | - | MD **1.39 higher** (0.79 lower to 3.57 higher) | ⨁◯◯◯ VERY LOW | CRITICAL |
| Subgroup analysis: Association between prenatal exercise and fetal heart rate response from before to after exercise of 0-20 min. | | | | | | | | | | | |
| 35 l | observational studies | not serious | serious a | not serious | not serious | none | 861 | - | MD **4.57 higher** (3.29 higher to 5.84 higher) | ⨁◯◯◯ VERY LOW | CRITICAL |
| Subgroup analysis: Association between prenatal exercise and fetal heart rate response from before to after exercise of 21-40 min. | | | | | | | | | | | |
| 5 b | observational studies | not serious | serious a | not serious | not serious | none | 60 | - | MD **6.51 higher** (2.88 higher to 10.15 higher) | ⨁◯◯◯ VERY LOW | CRITICAL |
| Subgroup analysis: Association between prenatal exercise and fetal heart rate response from before to after exercise > 40 min. | | | | | | | | | | | |
| 4 d | observational studies | not serious | serious a | not serious | not serious | none | 130 | - | MD **1.38 higher** (2.28 lower to 5.05 higher) | ⨁◯◯◯ VERY LOW | CRITICAL |
| Subgroup analysis: Association between prenatal exercise and fetal heart rate response before to after exercise using 2D Ultrasound. | | | | | | | | | | | |
| 4 d | observational studies | not serious | serious a | not serious | not serious | none | 79 | - | MD **8.32 higher** (3.06 higher to 13.59 higher) | ⨁◯◯◯ VERY LOW | CRITICAL |
| Subgroup analysis: Association between prenatal exercise and fetal heart rate response before to after exercise using Doppler Ultrasound. | | | | | | | | | | | |
| 40 m | observational studies | not serious | serious a | not serious | not serious | none | 1022 | - | MD **3.46 higher** (2.16 higher to 4.77 higher) | ⨁◯◯◯ VERY LOW | CRITICAL |
| Subgroup analysis: Association between prenatal exercise and fetal heart rate response before to after exercise using Electronic Fetal Monitor or Telemetry. | | | | | | | | | | | |
| 10 n | observational studies | not serious | serious a | not serious | not serious | none | 339 | - | MD **4.66 higher** (2.63 higher to 6.7 higher) | ⨁◯◯◯ VERY LOW | CRITICAL |
| Subgroup analysis: Association between prenatal exercise and fetal heart rate response before to after exercise using Ausculation. | | | | | | | | | | | |
| 1 | observational studies | not serious | serious e | not serious | not serious f | none | 54 | - | MD **0.44 lower** (3.07 lower to 2.19 higher) | ⨁◯◯◯ VERY LOW | CRITICAL |

**CI:** Confidence interval; **MD:** Mean difference; **OR:** Odds ratio

#### Explanations

a. Serious inconsistency. High heterogeneity (I2 >50%)

b. Three studies reported data on different sub-groups of women. These studies were counted only once.

c. One study reported data on different sub-groups of women. This study was counted only once.

d. Two studies reported data on different sub-groups of women. These studies were counted only once.

e. Serious inconsistency. Only only one study included.

f. No serious imprecision; only one study but already downgraded for serious inconsistency for this reason.

g. Thirty-two studies reported data on different sub-groups of women. These studies were counted only once.

h. Four studies reported data on different sub-groups of women. These studies were counted only once.

i. Twenty-nine studies reported data on different sub-groups of women. These studies were counted only once.

j. Eleven studies reported data on different sub-groups of women. These studies were counted only once.

k. Twenty-five studies reported data on different sub-groups of women. These studies were counted only once.

l. Twenty-four studies reported data on different sub-groups of women. These studies were counted only once.

m. Twenty-one studies reported data on different sub-groups of women. These studies were counted only once.

n. Eight studies reported data on different sub-groups of women. These studies were counted only once.

o. No serious risk of bias. Reporting bias was an issue in 11 studies (results were reported narratively).

## Effects of chronic prenatal exercise on FHR

### Online Supplement Table 5: Association between prenatal exercise and fetal heart rate post-intervention.

| **Quality assessment** | | | | | | | **№ of participants** | | | | **Effect** | | | **Quality** | **Importance** |
| --- | --- | --- | --- | --- | --- | --- | --- | --- | --- | --- | --- | --- | --- | --- | --- |
| **№ of studies** | **Study design** | **Risk of bias** | **Inconsistency** | **Indirectness** | **Imprecision** | **Other considerations** | **Prenatal Exercise** | | **No Exercise** | | **Relative (95% CI)** | | **Absolute (95% CI)** |
| Association between prenatal exercise (exercise only interventions) and fetal heart rate at rest post intervention. | | | | | | | | | | | | | | | |
| 4 | randomized trials | serious h | not serious | not serious | not serious | none | 103 | | 88 | | - | | MD **1.72 lower** (3.94 lower to 0.5 higher) | ⨁⨁⨁◯ MODERATE | CRITICAL |
| Evidence from non-randomized interventions (exercise only interventions) and fetal heart rate at rest post-intervention. | | | | | | | | | | | | | | | |
| 2 | observational studies g | serious k | not serious | not serious | not serious | none | 36 | | 22 | | - | | MD **2.13 lower** (3.38 lower to 0.89 lower) | ⨁◯◯◯ VERY LOW | CRITICAL |
| Association between different types of exercise (walking vs. yoga) and fetal heart rate at rest after exercise post-intervention. | | | | | | | | | | | | | | | |
| 1 | randomized trials | serious j | serious e | not serious | not serious f | none | 27 | | 32 | | - | | MD **3.7 higher** (1.34 lower to 8.74 higher) | ⨁⨁◯◯ LOW | CRITICAL |
| Evidence from a cohort study and fetal heart rate at rest after exercise post-intervention. | | | | | | | | | | | | | | | |
| 3 (pooled estimate of effect, n=1 c; 2 studies synthesized narratively) | observational studies l | not serious | serious e | not serious | not serious f | none | 16 | 16 | | - | | MD **9.21 lower** (15.86 lower to 2.55 lower) | | ⨁◯◯◯ VERY LOW | CRITICAL |
| Narrative synthesis: Two studies were included (n=63). One study reported that fetal heart rate at rest was correlated with minutes of leisure time physical activity.78 The second study reported that average fetal heart rate decreased from pre to post intervention (as gestation advanced).49 | | | | | | |
| Evidence from a cross sectional study and fetal heart rate at rest after exercise post-intervention. | | | | | | | | | | | | | | | |
| 1 c | observational studies m | not serious | serious e | not serious | not serious f | none | 26 | | 36 | | - | | MD **4.93 lower** (8.32 lower to 1.54 lower) | ⨁◯◯◯ VERY LOW | CRITICAL |
| Evidence from non-randomized interventions: Association between exercise only interventions and fetal heart rate during exercise post-Intervention. | | | | | | | | | | | | | | | |
| 2 | observational studies g | serious k | serious a | not serious | serious b | none | 31 | | 18 | | - | | MD **1.95 lower** (15.06 lower to 11.17 higher) | ⨁◯◯◯ VERY LOW | CRITICAL |
| Evidence from non-randomized interventions: Subgroup analysis: Association between exercise only interventions and fetal heart rate during exercise post-intervention in women who were previously active. | | | | | | | | | | | | | | | |
| 1 | observational studies g | serious j | serious e | not serious | not serious f | none | 9 | | 2 | | - | | MD **10.2 lower** (22.73 lower to 2.33 higher) | ⨁◯◯◯ VERY LOW | CRITICAL |
| Evidence from non-randomized interventions: Subgroup analysis: Association between exercise only interventions and fetal heart rate during exercise post-Intervention in women who were previously inactive. | | | | | | | | | | | | | | | |
| 1 | observational studies g | serious k | serious e | not serious | not serious f | none | 22 | | 16 | | - | | MD **3.48 higher** (0.59 higher to 6.37 higher) | ⨁◯◯◯ VERY LOW | CRITICAL |
| Evidence from non-randomized interventions: Subgroup analysis: Association between exercise only interventions and fetal heart rate during aerobic exercise alone post-intervention. | | | | | | | | | | | | | | | |
| 1 | observational studies g | serious j | serious e | not serious | not serious f | none | 22 | | 16 | | - | | MD **3.48 higher** (0.59 higher to 6.37 higher) | ⨁◯◯◯ VERY LOW | CRITICAL |
| Evidence from non-randomized interventions: Subgroup analysis: Association between exercise only interventions and fetal heart rate during different types of exercise post-intervention. | | | | | | | | | | | | | | | |
| 1 | observational studies g | serious k | serious e | not serious | not serious f | none | 9 | | 2 | | - | | MD **10.2 lower** (22.73 lower to 2.33 higher) | ⨁◯◯◯ VERY LOW | CRITICAL |
| Association between prenatal exercise (exercise only interventions) and fetal heart rate following acute exercise post-Intervention. | | | | | | | | | | | | | | | |
| 4 d | randomized trials | serious k | serious a | not serious | not serious | none | 104 | | 89 | | - | | MD **3.39 lower** (10.51 lower to 3.73 higher) | ⨁⨁◯◯ LOW | CRITICAL |
| Subgroup analysis: Association between exercise only interventions and fetal heart rate following acute exercise post-intervention of aerobic exercise alone. | | | | | | | | | | | | | | | |
| 2 | randomized trials | serious i | not serious | not serious | not serious | none | 40 | | 43 | | - | | MD **6.52 higher** (2.31 higher to 10.74 higher) | ⨁⨁⨁◯ MODERATE | CRITICAL |
| Subgroup analysis: Association between exercise only interventions and fetal heart rate following acute exercise post-intervention including combinations of different types of exercise. | | | | | | | | | | | | | | | |
| 2 d | randomized trials | serious k | not serious | not serious | not serious | none | 64 | | 46 | | - | | MD **9.16 lower** (13.46 lower to 4.86 lower) | ⨁⨁⨁◯ MODERATE | CRITICAL |
| Evidence from non-randomized interventions: Association between prenatal exercise (exercise only interventions) and fetal heart rate following acute exercise post-intervention. | | | | | | | | | | | | | | | |
| 2 | observational studies g | serious j | not serious | not serious | not serious | none | 36 | | 22 | | - | | MD **1.19 lower** (6.08 lower to 3.7 higher) | ⨁◯◯◯ VERY LOW | CRITICAL |

**CI:** Confidence interval; **MD:** Mean difference; **OR:** Odds ratio

#### Explanations

a. Serious inconsistency. High heterogeneity (I2 >50%)

b. Serious imprecision. The 95% CI crossed the line of no effect, and is wide, such that the interpretation of the data would be different if the true effect were at one end of the CI or the other.

c. One study reported data on different sub-groups of women. This study was counted only once.

d. Two studies reported data on different sub-groups of women. These studies were counted only once.

e. Serious inconsistency. Only one study included.

f. No serious imprecision; only one study but already downgraded for serious inconsistency for this reason.

g. Non-randomized intervention

h. Serious risk of bias. High performance and attrition risk of bias. Unclear risk of selection bias; it was unclear if sequence was adequately generated and if allocation was adequately concealed.

i. Serious risk of bias. High performance risk of bias.

j. Serious risk of bias. High attrition risk of bias.

k. Serious risk of bias. High risk of performance and attrition bias.

l. Cohort study

m. Cross-sectional study

n. No serious risk of bias. Reporting bias was an issue in one study; results were reported narratively.

## Effects of prenatal exercise on fetal bradycardia and tachycardia

### Online Supplement Table 6: The association between prenatal exercise (acute) and fetal bradycardia and tachycardia.

| **Quality assessment** | | | | | | | **№ of participants** | **Effect** | | **Quality** | **Importance** |
| --- | --- | --- | --- | --- | --- | --- | --- | --- | --- | --- | --- |
| **№ of studies** | **Study design** | **Risk of bias** | **Inconsistency** | **Indirectness** | **Imprecision** | **Other considerations** | **Acute prenatal exercise** | **Relative (95% CI)** | **Absolute (95% CI)** |
| Association between prenatal exercise and fetal bradycardia at rest. | | | | | | | | | | | |
| 8 d | observational studies | not serious | not serious | not serious | not serious | none | 423 | **OR 0.00** (0.00 to 0.03) | **-- per 1,000** (from -- to 0 fewer) | ⨁⨁◯◯ LOW | CRITICAL |
| Sensitivity analysis: Association between prenatal exercise and fetal bradycardia at rest without artifact. | | | | | | | | | | | |
| 7 d | observational studies | not serious | not serious | not serious | not serious | none | 4117 | **OR 0.00** (0.00 to 0.03) | **-- per 1,000** (from -- to 0 fewer) | ⨁⨁◯◯ LOW | CRITICAL |
| Association between prenatal exercise and fetal bradycardia during exercise. | | | | | | | | | | | |
| 7 e | observational studies | not serious | serious a | not serious | not serious | none | 755 | **OR 0.01** (0.01 to 0.01) | **0 fewer per 1,000** (from 0 fewer to 0 fewer) | ⨁◯◯◯ VERY LOW | CRITICAL |
| Sensitivity analysis: Association between prenatal exercise and fetal bradycardia during exercise without artifact. | | | | | | | | | | | |
| 6 e | observational studies | not serious | serious a | not serious | not serious | none | 749 | **OR 0.01** (0.00 to 0.04) | **0 fewer per 1,000** (from -- to 0 fewer) | ⨁◯◯◯ VERY LOW | CRITICAL |
| Association between prenatal exercise and fetal bradycardia after exercise. | | | | | | | | | | | |
| 22 c | observational studies | not serious | serious a | not serious | not serious | none | 1614 | **OR 0.01** (0.00 to 0.03) | **0 fewer per 1,000** (from -- to 0 fewer) | ⨁◯◯◯ VERY LOW | CRITICAL |
| Sensitivity analysis: Association between prenatal exercise and fetal bradycardia after exercise without artifact. | | | | | | | | | | | |
| 20 c | observational studies | not serious | serious a | not serious | not serious | none | 1589 | **OR 0.01** (0.00 to 0.03) | **0 fewer per 1,000** (from -- to 0 fewer) | ⨁◯◯◯ VERY LOW | CRITICAL |
| Association between prenatal exercise and fetal tachycardia at rest. | | | | | | | | | | | |
| 8 d | observational studies | not serious | serious a | not serious | not serious | none | 505 | **OR 0.03** (0.00 to 0.14) | **0 fewer per 1,000** (from -- to 0 fewer) | ⨁◯◯◯ VERY LOW | CRITICAL |
| Association between prenatal exercise and fetal tachycardia during exercise. | | | | | | | | | | | |
| 6 b | observational studies | not serious | serious a | not serious | not serious | none | 77 | **OR 0.50** (0.20 to 0.16) | **1 fewer per 1,000** (from 0 fewer to 0 fewer) | ⨁◯◯◯ VERY LOW | CRITICAL |
| Association between prenatal exercise and fetal tachycardia after exercise. | | | | | | | | | | | |
| 14 b | observational studies | not serious | serious a | not serious | not serious | none | 644 | **OR 0.07** (0.03 to 0.15) | **0 fewer per 1,000** (from 0 fewer to 0 fewer) | ⨁◯◯◯ VERY LOW | CRITICAL |

**CI:** Confidence interval; **MD:** Mean difference; **OR:** Odds ratio

#### Explanations

a. Serious inconsistency. High heterogeneity (I2 >50%)

b. Three studies reported data on different sub-groups of women. These studies were counted only once.

c. Seven studies reported data on different sub-groups of women. These studies were counted only once.

d. Two studies reported data on different sub-groups of women. These studies were counted only once.

e. Four studies reported data on different sub-groups of women. These studies were counted only once.

## Umbilical blood flow during and following acute prenatal exercise

### Online Supplement Table 7: The association between prenatal exercise and umbilical blood flow.

| **Quality assessment** | | | | | | | | | | | | | | **№ of participants** | | | **Effect** | | **Quality** | **Importance** |
| --- | --- | --- | --- | --- | --- | --- | --- | --- | --- | --- | --- | --- | --- | --- | --- | --- | --- | --- | --- | --- |
| **№ of studies** | | **Study design** | | **Risk of bias** | | **Inconsistency** | | **Indirectness** | | **Imprecision** | | **Other considerations** | | **Prenatal exercise** | | | **Relative (95% CI)** | **Absolute (95% CI)** |
| Association between prenatal exercise and umbilical systolic/diastolic (S/D) ratio blood flow velocities from before to during exercise. | | | | | | | | | | | | | | | | | | | | |
| 3 (pooled estimate of effect, n=2; 1 study reported narratively) | | observational studies | | not serious g | | not serious | | not serious | | not serious | | none | | 41 | - | | | MD **0.04 lower** (0.1 lower to 0.01 higher) | ⨁⨁◯◯ LOW | CRITICAL |
| Narrative summary: One study (n=14) reported that umbilical blood flow decreased with exercise in the supine position compared to left-lateral rest.18 | | | |
| Association between prenatal exercise and umbilical systolic/diastolic (S/D) ratio blood flow velocities from before to after exercise. | | | | | | | | | | | | | | | | | | | | |
| 10 a | | observational studies | | not serious | | serious b | | not serious | | not serious | | none | | 197 | | | - | MD **0**  (0.14 lower to 0.13 higher) | ⨁◯◯◯ VERY LOW | CRITICAL |
| Subgroup analysis: Association between prenatal exercise and umbilical systolic/diastolic (S/D) ratio blood flow velocities from before to after exercise of low intensity. | | | | | | | | | | | | | | | | | | | | |
| 2 | | observational studies | | not serious | | serious b | | not serious | | not serious | | none | | 38 | | | - | MD **0.03 lower** (0.25 lower to 0.19 higher) | ⨁◯◯◯ VERY LOW | CRITICAL |
| Subgroup analysis: Association between prenatal exercise and umbilical systolic/diastolic (S/D) ratio blood flow velocities from before to after exercise of moderate intensity. | | | | | | | | | | | | | | | | | | | | |
| 3 c | | observational studies | | not serious | | not serious | | not serious | | not serious | | none | | 48 | | | - | MD **0.03 lower** (0.47 lower to 0.13 lower) | ⨁⨁◯◯ LOW | CRITICAL |
| Subgroup analysis: Association between prenatal exercise and umbilical systolic/diastolic (S/D) ratio blood flow velocities from before to after exercise of vigorous intensity. | | | | | | | | | | | | | | | | | | | | |
| 6 d | | observational studies | | not serious | | not serious | | not serious | | not serious | | none | | 111 | | | - | MD **0.08 higher** (0.03 lower to 0.19 higher) | ⨁⨁◯◯ LOW | CRITICAL |
| Subgroup analysis: Association between prenatal exercise and umbilical systolic/diastolic (S/D) ratio blood flow velocities from before to after exercise of 0-20 min. | | | | | | | | | | | | | | | | | | | | |
| 6 d | | observational studies | | not serious | | not serious | | not serious | | not serious | | none | | 119 | | | - | MD **0.16 lower** (0.32 lower to 0 ) | ⨁⨁◯◯ LOW | CRITICAL |
| Subgroup analysis: Association between prenatal exercise and umbilical systolic/diastolic (S/D) ratio blood flow velocities from before to after exercise of 20-39 min. | | | | | | | | | | | | | | | | | | | | |
| 1 | | observational studies | | not serious | | serious e | | not serious | | not serious f | | none | | 15 | | | - | MD **0.02 higher** (0.32 lower to 0.36 higher) | ⨁◯◯◯ VERY LOW | CRITICAL |
| Subgroup analysis: Association between prenatal exercise and umbilical systolic/diastolic (S/D) ratio blood flow velocities from before to after exercise of 40 minutes or greater. | | | | | | | | | | | | | | | | | | | | |
| 2 c | | observational studies | | not serious | | not serious | | not serious | | not serious | | none | | 32 | | | - | MD **0.09 lower** (0.3 lower to 0.12 higher) | ⨁⨁◯◯ LOW | CRITICAL |
| Subgroup analysis: Association between prenatal exercise and umbilical systolic/diastolic (S/D) ratio blood flow velocities from before to after exercise of duration not specified. | | | | | | | | | | | | | | | | | | | | |
| 2 c | | observational studies | | not serious | | not serious | | not serious | | not serious | | none | | 31 | | | - | MD **0.18 higher** (0.08 higher to 0.28 higher) | ⨁⨁◯◯ LOW | CRITICAL |
| Association between prenatal exercise and umbilical blood flow pulsatility index (PI) from before to after exercise. | | | | | | | | | | | | | | | | | | | | |
| 7 (pooled estimate of effect, n=6d; 1 study reported narratively) | | observational studies | | not serious g | | serious b | | not serious | | not serious | | none | | 280 | | | - | MD **0.01 lower** (0.04 lower to 0.02 higher) | ⨁◯◯◯ VERY LOW | CRITICAL |
| Narrative summary: One study was included (n=13) and reported that umbilical blood flow pulsatility index decreased following acute exercise.61 | | | | |
| Association between prenatal exercise and umbilical blood flow resistance index (RI) from before to after exercise. | | | | | | | | | | | | | | | | | | | | |
| 5 (pooled estimate of effect, n=4c; 1 study reported narratively) | | observational studies | | not serious g | | not serious | | not serious | | not serious | | none | | 115 | | | - | MD **0.02 lower** (0.04 lower to 0 ) | ⨁⨁◯◯ LOW | CRITICAL |
| Narrative summary: One study was included (n=13) and reported that umbilical blood flow resistance index decreased following acute exercise.61 | | | | |
| Association between prenatal exercise and umbilical blood flow velocity from before to after exercise. | | | | | | | | | | | | | | | | | | | | |
| 1 | observational studies | | not serious | | serious e | | not serious | | not serious f | | none | | 14 | | | - | | MD **1.5 higher** (1.2 lower to 4.2 higher) | ⨁◯◯◯ VERY LOW | CRITICAL |

**CI:** Confidence interval; **MD:** Mean difference

#### Explanations

a. Four studies reported data on different sub-groups of women. These studies were counted only once.

b. Serious inconsistency. High heterogeneity (I2 >50%).

c. One study reported data on different sub-groups of women. This study was counted only once.

d. Two studies reported data on different sub-groups of women. These studies were counted only once.

e. Serious inconsistency. Only one study included.

f. No serious imprecision; only one study but already downgraded for serious inconsistency for this reason.

g. No serious risk of bias. Reporting bias was an issue in one study; results were reported narratively.

## Effects of chronic exercise on umbilical artery blood flow

### Online Supplement Table 8: The association between prenatal exercise trials and umbilical blood flow.

| **Quality assessment** | | | | | | | **№ of participants** | | **Effect** | | **Quality** | **Importance** |
| --- | --- | --- | --- | --- | --- | --- | --- | --- | --- | --- | --- | --- |
| **№ of studies** | **Study design** | **Risk of bias** | **Inconsistency** | **Indirectness** | **Imprecision** | **Other considerations** | **exercise (acute or chronic)** | **no exercise or different frequency, intensity, time, volume and type of exercise** | **Relative (95% CI)** | **Absolute (95% CI)** |
| Association between prenatal exercise (exercise only interventions) and umbilical blood flow systolic/diastolic ratio (S/D) at rest post-intervention. | | | | | | | | | | | | |
| 1 | randomized trial | serious c | serious a | not serious | not serious b | none | 20 | 20 | - | MD **0.52 lower** (0.56 lower to 0.48 lower) | ⨁⨁◯◯ LOW | CRITICAL |
| Association between prenatal exercise (superiority trial) and umbilical blood flow systolic/diastolic ratio (S/D) at rest post-intervention. | | | | | | | | | | | | |
| 1 | randomized trial | not serious | serious a | not serious | not serious b | none | 27 | 32 | - | MD **0.3 lower** (0.58 lower to 0.02 lower) | ⨁⨁⨁◯ MODERATE | CRITICAL |
| Association between prenatal exercise (exercise only interventions) and umbilical blood flow pulsatile index (PI) at rest post-intervention. | | | | | | | | | | | | |
| 2 | randomized trials | serious c | not serious | not serious | not serious | none | 46 | 53 | - | MD **0.06 lower** (0.08 lower to 0.04 lower) | ⨁⨁⨁◯ MODERATE | CRITICAL |
| Association between prenatal exercise (superiority trial) and umbilical blood flow pulsatile index (PI) at rest post-intervention. | | | | | | | | | | | | |
| 1 | randomized trial | not serious | serious a | not serious | not serious b | none | 27 | 32 | - | MD **0.18 lower** (0.28 lower to 0.08 lower) | ⨁⨁⨁◯ MODERATE | CRITICAL |
| Association between prenatal exercise (exercise only interventions) and umbilical blood flow resistance index (RI) at rest post-intervention. | | | | | | | | | | | | |
| 1 | randomized trial | serious c | serious a | not serious | not serious b | none | 20 | 20 | - | MD **0.07 lower** (0.07 lower to 0.06 lower) | ⨁⨁◯◯ LOW | CRITICAL |
| Association between prenatal exercise (superiority trial) and umbilical blood flow resistance index (RI) at rest post-intervention. | | | | | | | | | | | | |
| 1 | randomized trial | not serious | serious a | not serious | not serious b | none | 27 | 32 | - | MD **0.03 lower** (0.07 lower to 0.01 higher) | ⨁⨁⨁◯ MODERATE | CRITICAL |
| Evidence from a non-randomized intervention: Association between prenatal exercise and umbilical Doppler velocimetry score at rest post-intervention. | | | | | | | | | | | | |
| 1 | observational | not serious d | serious a | not serious | not serious b | none | Narrative summary: One study was included (n=13) and reported that the umbilical Doppler velocimetry score did not change between groups.84 | | | | ⨁◯◯◯ VERY LOW | CRITICAL |
| Association between prenatal exercise and umbilical blood flow pulsatile index (PI) after acute exercise post-intervention. | | | | | | | | | | | | |
| 1 | randomized trial | not serious d | serious a | not serious | not serious b | none | Narrative summary: One study was included (n=26) and reported that the umbilical blood flow pulsatile index (PI) did not change after acute exercise post-intervention in the intervention group. The control group was not measured.80 | | | | ⨁⨁⨁◯ MODERATE | CRITICAL |

CI: Confidence interval; MD: Mean difference

#### Explanations

a. Serious inconsistency. Only one study included.

b. No serious imprecision; only one study but already downgraded for serious inconsistency for this reason.

c. Serious risk of bias. High risk of performance and attrition bias.

d. No serious risk of bias. Reporting bias was an issue in one study; results were reported narratively.

## Uterine artery blood flow during and following acute prenatal exercise

### Online Supplement Table 9: The association between prenatal exercise and uterine blood flow.

| **Quality assessment** | | | | | | | | **№ of participants** | **Effect** | | **Quality** | **Importance** |
| --- | --- | --- | --- | --- | --- | --- | --- | --- | --- | --- | --- | --- |
| **№ of studies** | **Study design** | **Risk of bias** | | **Inconsistency** | **Indirectness** | **Imprecision** | **Other considerations** | **Prenatal exercise** | **Relative (95% CI)** | **Absolute (95% CI)** |
| Association between prenatal exercise and uterine artery systolic/diastolic (S/D) ratio from before to during exercise. | | | | | | | | | | | | |
| 2 | observational studies | not serious | | serious a | not serious | not serious | none | 32 | - | MD **0.2 higher** (0.38 lower to 0.77 higher) | ⨁◯◯◯ VERY LOW | CRITICAL |
| Association between prenatal exercise and uterine artery systolic/diastolic (S/D) ratio from before to after exercise | | | | | | | | | | | | |
| 5 b | observational studies | not serious | | serious a | not serious | not serious | none | 103 | - | MD **0.15 higher** (0.08 lower to 0.38 higher) | ⨁◯◯◯ VERY LOW | CRITICAL |
| Subgroup analysis: Association between prenatal exercise and uterine artery systolic/diastolic (S/D) ratio from before to after exercise in women who were previously inactive. | | | | | | | | | | | | |
| 1 | observational studies | not serious | | serious c | not serious | not serious d | none | 15 | - | MD **0.11 lower** (0.32 lower to 0.1 higher) | ⨁◯◯◯ VERY LOW | CRITICAL |
| Subgroup analysis: Association between prenatal exercise and uterine artery systolic/diastolic (S/D) ratio from before to after exercise in women who were previously active. | | | | | | | | | | | | |
| 3 b | observational studies | not serious | | not serious | not serious | not serious | none | 55 | - | MD **0.02 higher** (0.1 lower to 0.14 higher) | ⨁⨁◯◯ LOW | CRITICAL |
| Subgroup analysis: Association between prenatal exercise and uterine artery systolic/diastolic (S/D) ratio from before to after exercise in women with previously unspecified activity levels. | | | | | | | | | | | | |
| 2 | observational studies | not serious | | not serious | not serious | not serious | none | 33 | - | MD **0.56 higher** (0.41 higher to 0.7 higher) | ⨁⨁◯◯ LOW | CRITICAL |
| Association between prenatal exercise and uterine artery pulsatility index (PI) from before to after exercise. | | | | | | | | | | | | |
| 7 (pooled estimate of effect, n=5e; 2 studies synthesized narratively) | observational studies | not serious g | | not serious | not serious | not serious | none | 205 | - | MD **0.01 lower** (0.04 lower to 0.01 higher) | ⨁⨁◯◯ LOW | CRITICAL |
| Narrative synthesis: Two studies were included (n=107) and reported no change in the uterine artery PI from before to after exercise.61 88 | | |
| Association between prenatal exercise and uterine artery resistance index (RI) from before to after exercise. | | | | | | | | | | | | |
| 5 (pooled estimate of effect, n=4f; 1 study reported narratively) | observational studies | not serious g | | serious a | not serious | not serious | none | 104 | - | MD **0.01 higher** (0.02 lower to 0.04 higher) | ⨁◯◯◯ VERY LOW | CRITICAL |
| Narrative summary: One study was included (n=13) and showed no change in uterine artery RI from before to after exercise.61 | | |
| Subgroup analysis: Association between prenatal exercise and uterine artery (RI) from before to after exercise of low intensity. | | | | | | | | | | | | |
| 1 | observational studies | not serious | | serious c | not serious | not serious d | none | 12 | - | MD **0.07 higher** (0.02 higher to 0.12 higher) | ⨁◯◯◯ VERY LOW | CRITICAL |
| Subgroup analysis: Association between prenatal exercise and uterine artery (RI) from before to after exercise of moderate intensity. | | | | | | | | | | | | |
| 1 | observational studies | not serious | | serious c | not serious | not serious d | none | 33 | - | MD **0.03 lower** (0.08 lower to 0.02 higher) | ⨁◯◯◯ VERY LOW | CRITICAL |
| Subgroup analysis: Association between prenatal exercise and uterine artery (RI) from before to after exercise of vigorous intensity. | | | | | | | | | | | | |
| 2 f | observational studies | not serious | | not serious | not serious | not serious | none | 59 | - | MD **0.01 higher** (0.01 lower to 0.03 higher) | ⨁⨁◯◯ LOW | CRITICAL |
| Subgroup analysis: Association between prenatal exercise and uterine artery (RI) from before to after exercise <20 min. | | | | | | | | | | | | |
| 3 f | observational studies | not serious | | not serious | not serious | not serious | none | 77 | - | MD **0.01 lower** (0.03 lower to 0.01 higher) | ⨁⨁◯◯ LOW | CRITICAL |
| Subgroup analysis: Association between prenatal exercise and uterine artery (RI) from before to after exercise of 20 min. or greater. | | | | | | | | | | | | |
| 1 | observational studies | not serious | | serious c | not serious | not serious | none | 15 | - | MD **0.04 higher** (0 to 0.08 higher) | ⨁◯◯◯ VERY LOW | CRITICAL |
| Subgroup analysis: Association between prenatal exercise and uterine artery (RI) from before to after exercise with unspecified duration. | | | | | | | | | | | | |
| 1 | observational studies | not serious | | serious c | not serious | not serious | none | 12 | - | MD **0.07 higher** (0.02 higher to 0.12 higher) | ⨁◯◯◯ VERY LOW | CRITICAL |
| Association between prenatal exercise and uterine blood flow (ml/min) from before to during exercise. | | | | | | | | | | | | |
| 1 | observational studies | | not serious | serious a | not serious | not serious b | none | 14 | - | MD **55 lower** (113.9 lower to 3.9 higher) | ⨁◯◯◯ VERY LOW | CRITICAL |
| **Additional data from study included in the pooled estimate.** When baseline values occurred in the supine position, there was no change in uterine blood flow (ml/min) from before to during supine exercise. 18 h | | |
| Association between prenatal exercise and uterine blood flow (ml/min) from before to after exercise. | | | | | | | | | | | | |
| 1 | observational studies | | not serious | serious a | not serious | not serious b | none | 14 | - | MD **1 lower** (53.76 lower to 51.76 higher) | ⨁◯◯◯ VERY LOW | CRITICAL |
| **Additional data from study included in the pooled estimate.** When baseline values occurred in the supine position, there was no change in uterine blood flow (ml/min) from before to after supine exercise. 18 h | | |  |  |
| Association between prenatal exercise and uterine blood velocity (cm/s) from before to during exercise. | | | | | | | | | | | | |
| 1 | observational studies | | not serious | serious a | not serious | not serious b | none | 14 | - | MD **5 higher** (2.1 lower to 12.1 higher) | ⨁◯◯◯ VERY LOW | CRITICAL |
| **Additional data from study included in the pooled estimate.** When baseline values occurred in the supine position, there was no change in uterine blood velocity (cm/s) from before to during supine exercise.18 h | | |  |  |
| Association between prenatal exercise and uterine blood velocity (cm/s) from before to after exercise. | | | | | | | | | | | | |
| 1 | observational studies | | not serious | serious a | not serious | not serious b | none | 14 | - | MD **1 lower** (7.8 lower to 5.8 higher) | ⨁◯◯◯ VERY LOW | CRITICAL |
| **Additional data from study included in the pooled estimate.** When baseline values occurred in the supine position, there was no change in uterine blood velocity (cm/s) from before to after supine exercise. 18 h | | |

**CI:** Confidence interval; **MD:** Mean difference

#### Explanations

a. Serious inconsistency. High heterogeneity (I2 >50%).

b. One study reported data on different sub-groups of women. This study was only counted once.

c. Serious inconsistency. Only one study was included.

d. No serious imprecision; only one study but already downgraded for serious inconsistency for this reason

e. Three studies reported data on different sub-groups of women. These studies were counted only once.

f. Two studies reported data on different sub-groups of women. These studies were counted only once.

g. No serious risk of bias. Reporting bias was an issue in one study; results were reported narratively.

h. One study reported data that was included in the meta-analysis and additional data reported narratively. This study was counted only once.

## Effects of chronic exercise on uterine artery blood flow

### Online Supplement Table 10: The association between prenatal exercise trials and uterine artery blood flow.

| **Quality assessment** | | | | | | | **№ of participants** | | | | **Effect** | | | **Quality** | **Importance** |
| --- | --- | --- | --- | --- | --- | --- | --- | --- | --- | --- | --- | --- | --- | --- | --- |
| **№ of studies** | **Study design** | **Risk of bias** | **Inconsistency** | **Indirectness** | **Imprecision** | **Other considerations** | **Prenatal exercise** | | **No exercise** | | **Relative (95% CI)** | | **Absolute (95% CI)** |
| Association between prenatal exercise (superiority trial) and uterine artery systolic/ diastolic ratios (S/D) at rest post-intervention. | | | | | | | | | | | | | | | |
| 1 a | randomized trials | not serious | serious b | not serious | not serious c | none | 28 | | 32 | | - | | MD **0.4 lower** (0.72 lower to 0.08 lower) | ⨁⨁⨁◯ MODERATE | CRITICAL |
| Association between prenatal exercise (exercise only interventions) and uterine artery pulsatility index (PI) at rest post-intervention. | | | | | | | | | | | | | | | |
| 3 (pooled estimate of effect, n=1; 2 studies synthesized narratively) | randomized trials | serious d | serious b | not serious | not serious c | none | 26 | 33 | | - | | MD **0.02 higher** (0.1 lower to 0.14 higher) | | ⨁⨁◯◯ LOW | CRITICAL |
| Narrative synthesis: Two studies were included (n=245) and reported no difference in uterine artery PI between exercise and control groups.84 85 | | | | | | |
| Association between prenatal exercise (superiority trial) and uterine artery pulsatility index (PI) at rest post-intervention. | | | | | | | | | | | | | | | |
| 1 a | randomized trial | not serious | serious b | not serious | not serious c | none | 28 | | 32 | | - | | MD **0.21 lower** (0.41 lower to 0.01 lower) | ⨁⨁⨁◯ MODERATE | CRITICAL |
| Association between prenatal exercise (superiority trial) and uterine artery resistance index (RI) at rest post-intervention. | | | | | | | | | | | | | | | |
| 1 a | randomized trial | not serious | serious b | not serious | not serious c | none | 28 | | 32 | | - | | MD **0.1 lower** (0.16 lower to 0.04 lower) | ⨁⨁⨁◯ MODERATE | CRITICAL |
| Association between prenatal exercise and uterine blood flow pulsatile index (PI) after acute exercise post-intervention. | | | | | | | | | | | | | | | |
| 1 | randomized trial | not serious | serious b | not serious | not serious c | none | Narrative summary: One study was included (n=26) and reported that the uterine blood flow pulsatile index (PI) did not change after acute exercise post-intervention in the intervention group. The control group was not measured.80 | | | | | | | ⨁⨁⨁◯ MODERATE | CRITICAL |

CI: Confidence interval; MD: Mean difference

#### Explanations

a. One study reported data on different sub-groups of women. This study was counted only once.

b. Serious inconsistency. Only one study was included.

c. No serious imprecision; only one study but already downgraded for serious inconsistency for this reason

d. Serious risk of bias. High risk of attrition bias. Reporting bias was an issue in one study; results were reported narratively.

# Supplemental Figures: Forest Plots

## Fetal heart rate during exercise


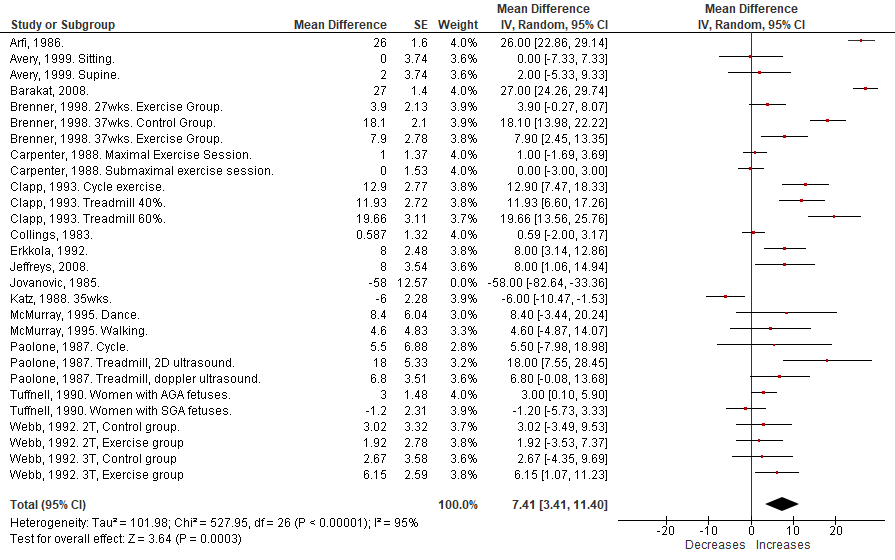


*Online Supplement Figure 1.* Impact of acute prenatal exercise on fetal heart rate (FHR) from pre-to-during exercise. Sensitivity analyses removing study with potential bias.7 FHR values are reported in bpm. Analyses conducted with a random effects model. CI, confidence interval; df, degrees of freedom; IV, inverse variance; SE, standard error; AGA, average for gestational age; SGA, small for gestational age.


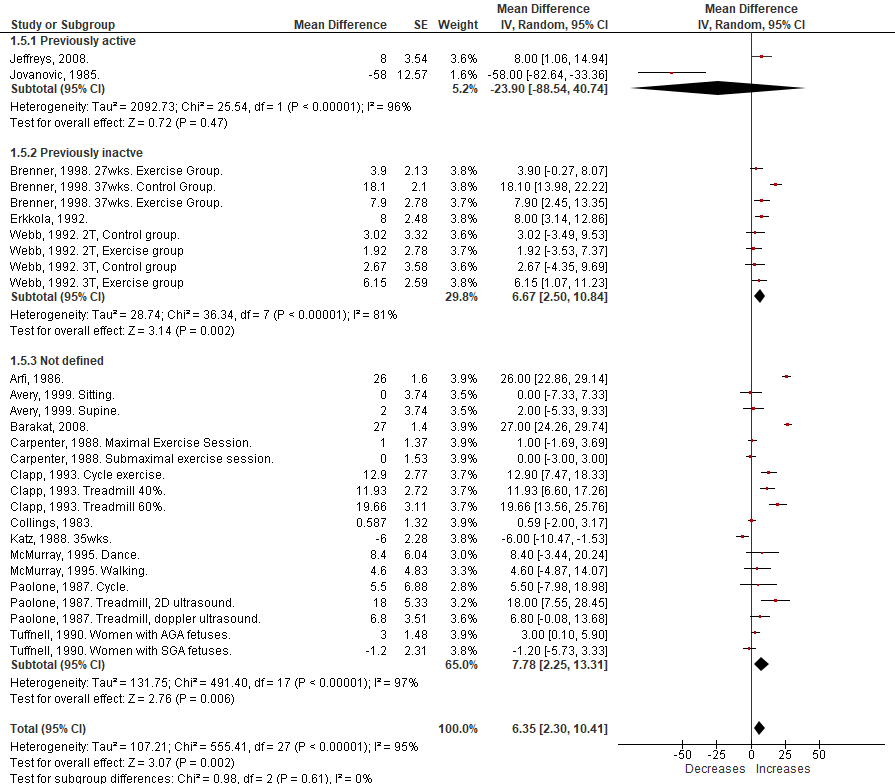


*Online Supplement Figure 2.* Impact of acute prenatal exercise on fetal heart rate (FHR) from pre-to-during exercise. Subgroup analyses were comparing women who were previously active to those previous inactive. FHR values are reported in bpm. Analyses conducted with a random effects model. CI, confidence interval; df, degrees of freedom; IV, inverse variance; SE, standard error; AGA, average for gestational age; SGA, small for gestational age; 2T, second trimester; 3T, third trimester.


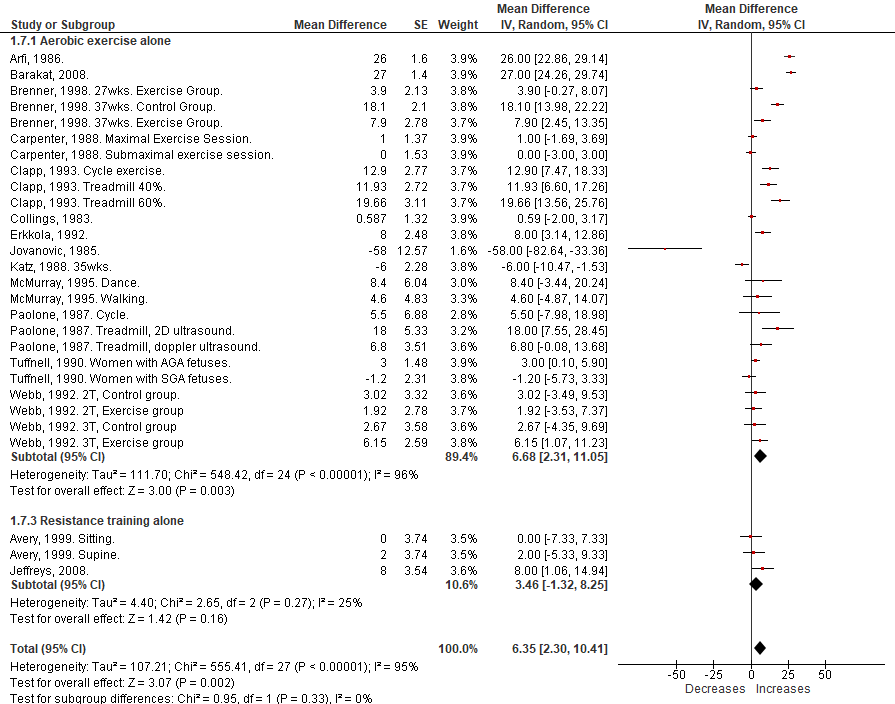


*Online Supplement Figure 3.* Impact of acute prenatal exercise on fetal heart rate (FHR) from pre-to-during exercise. Subgroup analyses were comparing women engaging in aerobic versus resistance training activities. FHR values are reported in bpm. Analyses conducted with a random effects model. CI, confidence interval; df, degrees of freedom; IV, inverse variance; SE, standard error; AGA, average for gestational age; SGA, small for gestational age; 2T, second trimester; 3T, third trimester.

*
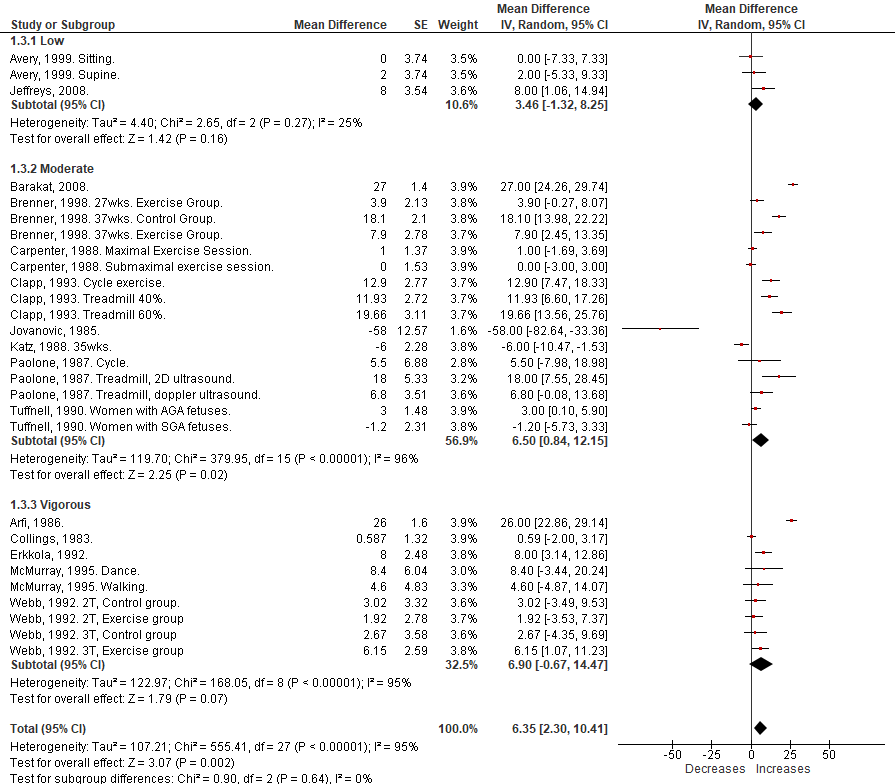
Online Supplement Figure 4.* Impact of acute prenatal exercise on fetal heart rate (FHR) from pre-to-during exercise. Subgroup analyses were comparing women engaging in activities of different intensities. FHR values are reported in bpm. Analyses conducted with a random effects model. CI, confidence interval; df, degrees of freedom; IV, inverse variance; SE, standard error; AGA, average for gestational age; SGA, small for gestational age; 2T, second trimester; 3T, third trimester.


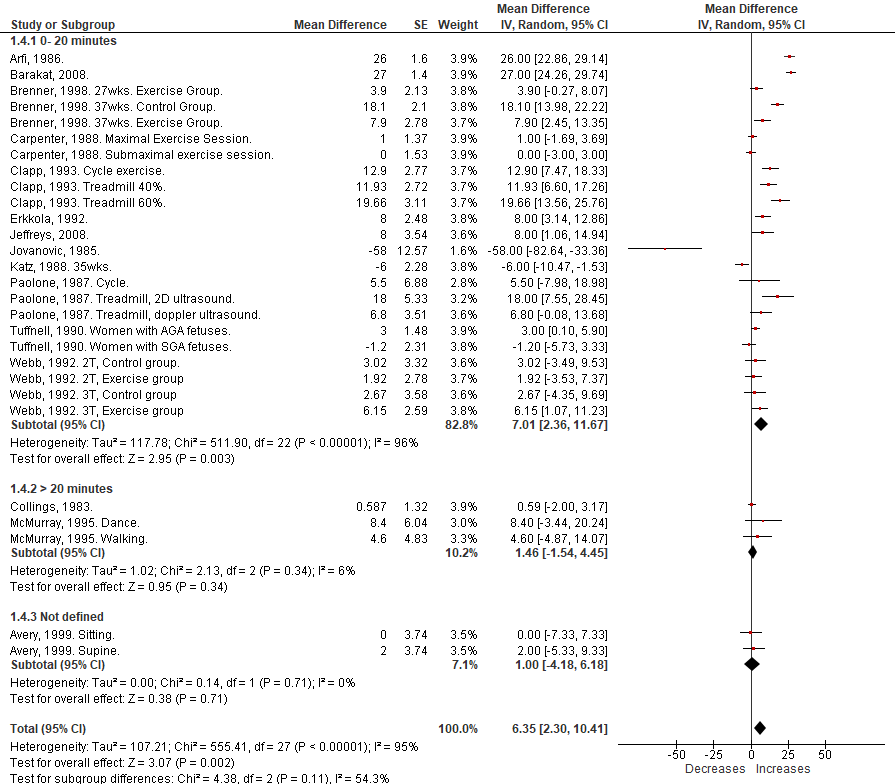


*Online Supplement Figure 5.* Impact of acute prenatal exercise on fetal heart rate (FHR) from pre-to-during exercise. Subgroup analyses were comparing women engaging in activities of different durations. FHR values are reported in bpm. Analyses conducted with a random effects model. CI, confidence interval; df, degrees of freedom; IV, inverse variance; SE, standard error; AGA, average for gestational age; SGA, small for gestational age; 2T, second trimester; 3T, third trimester.


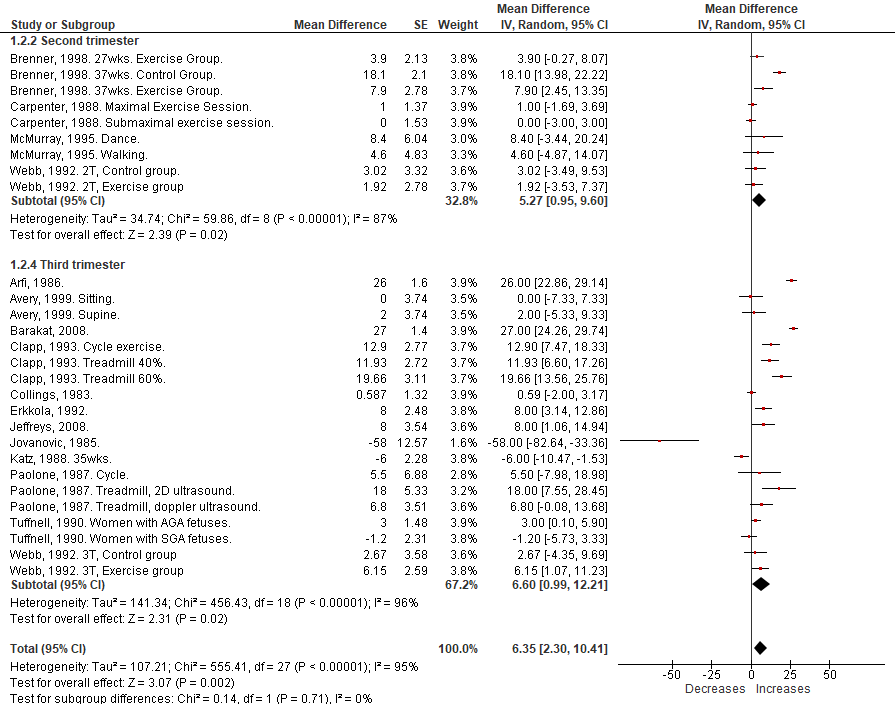


*Online Supplement Figure 6.* Impact of acute prenatal exercise on fetal heart rate (FHR) from pre-to-during exercise. Subgroup analyses were comparing women engaging in activities in the second and third trimester. FHR values are reported in bpm. Analyses conducted with a random effects model. CI, confidence interval; df, degrees of freedom; IV, inverse variance; SE, standard error; AGA, average for gestational age; SGA, small for gestational age; 2T, second trimester; 3T, third trimester.


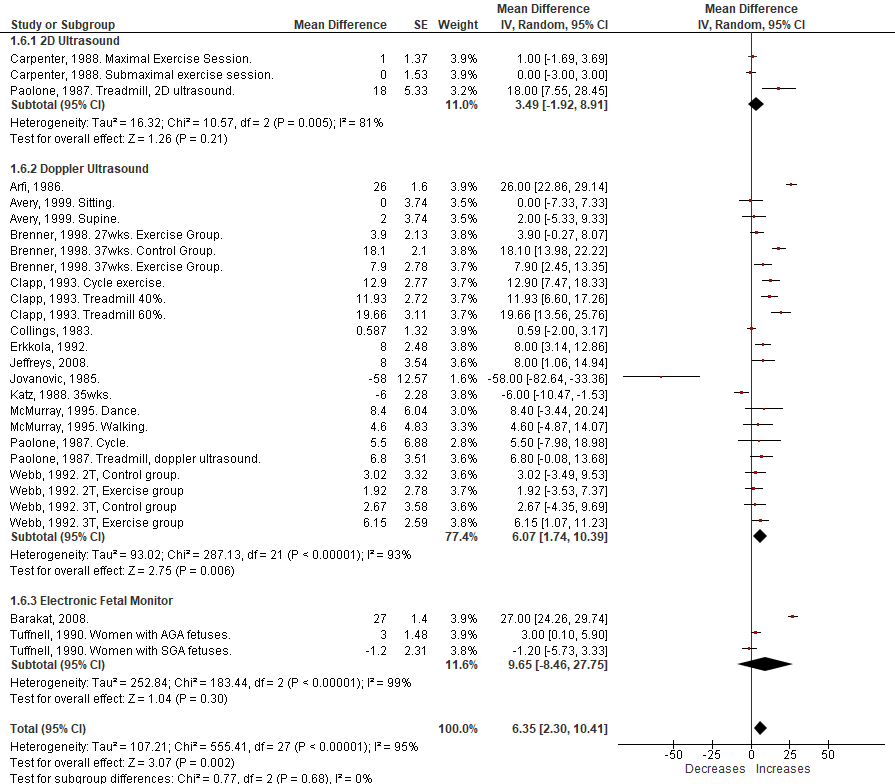


*Online Supplement Figure 7.* Impact of acute prenatal exercise on fetal heart rate (FHR) from pre-to-during exercise. Subgroup analyses were comparing different methods of determining FHR during acute exercise. FHR values are reported in bpm. Analyses conducted with a random effects model. CI, confidence interval; df, degrees of freedom; IV, inverse variance; SE, standard error; AGA, average for gestational age; SGA, small for gestational age; 2T, second trimester; 3T, third trimester.

## Fetal heart rate following exercise


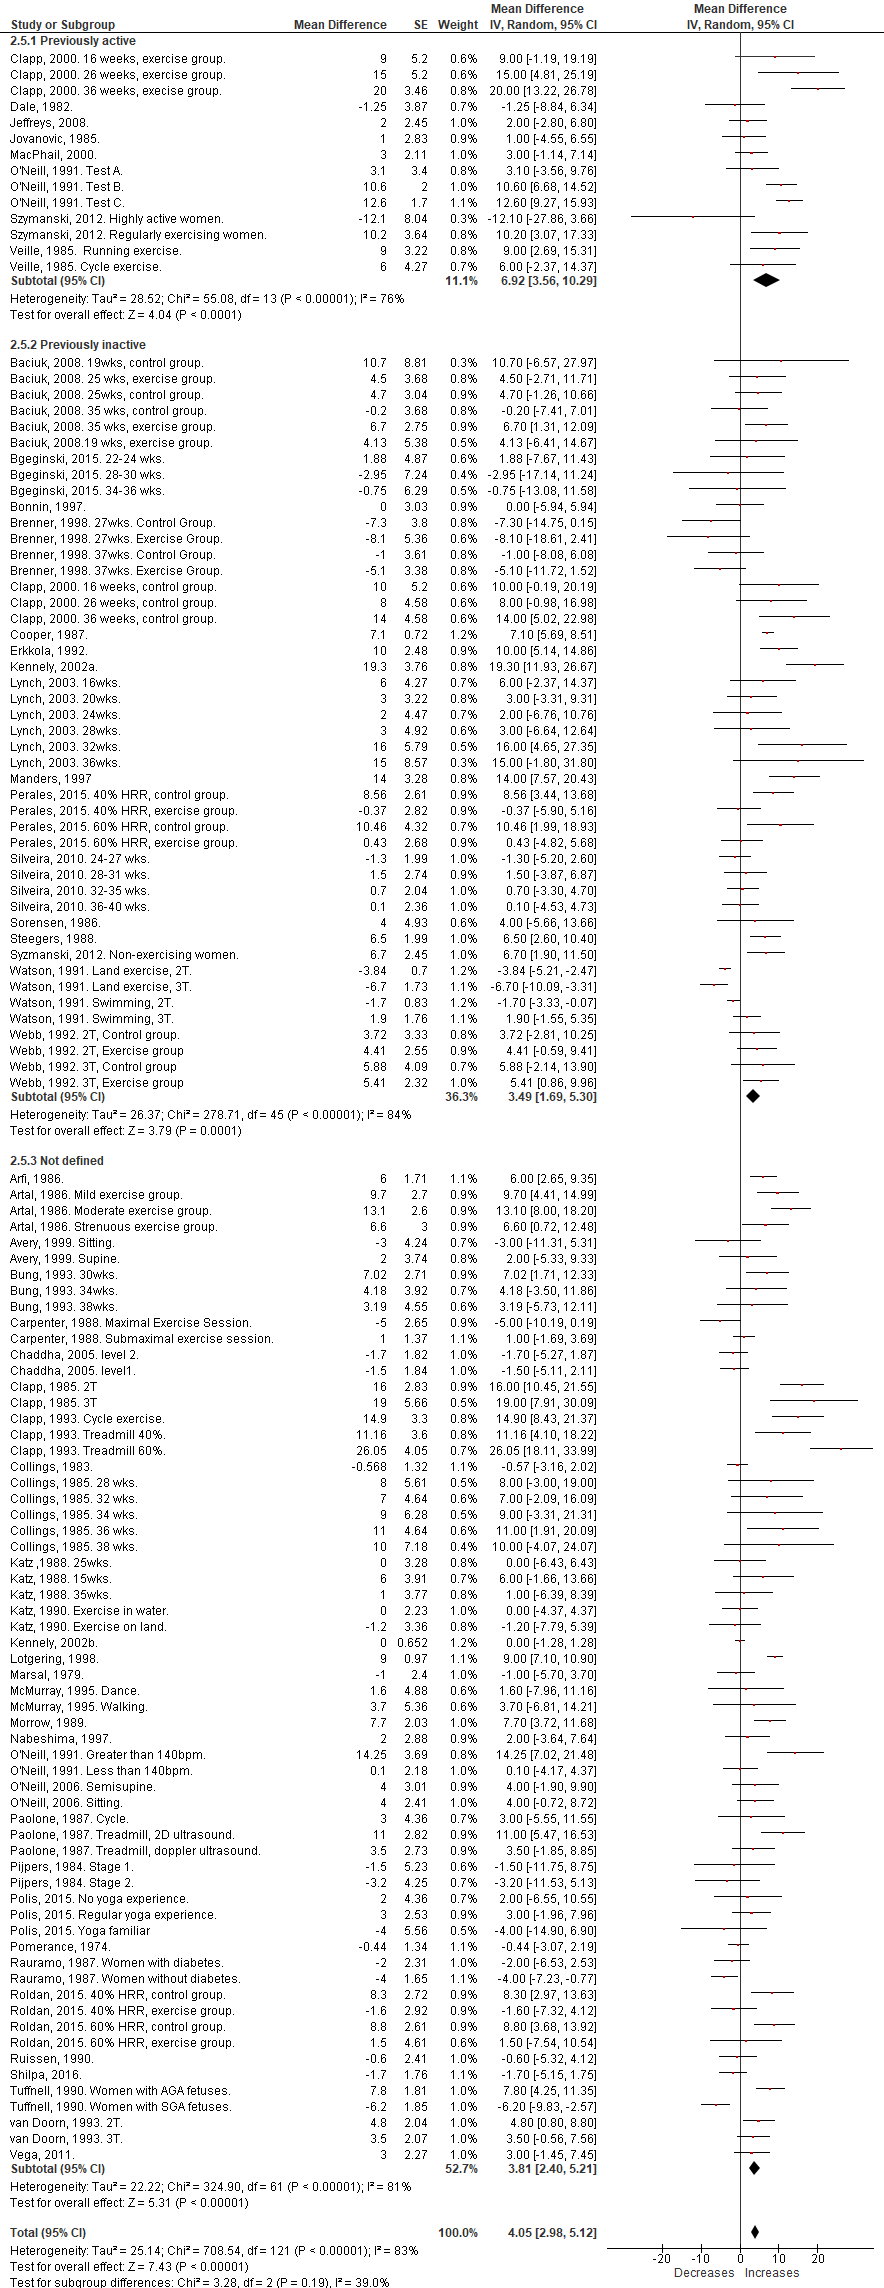


*Online Supplement Figure 8.* Effect of acute prenatal exercise on fetal heart rate (FHR) following exercise. Data reported as a mean difference compared to baseline, resting conditions. Subgroup analysis were comparing women who were previously active to those who were previously inactive. Analysis conducted using a random effects model. SE, standard error; IV, inverse variance, AGA, average for gestational age; SGA, small for gestational age, 2T, second trimester; 3T, third trimester; EX, exercise group; CTRL, control group; HRR, heart rate reserve.


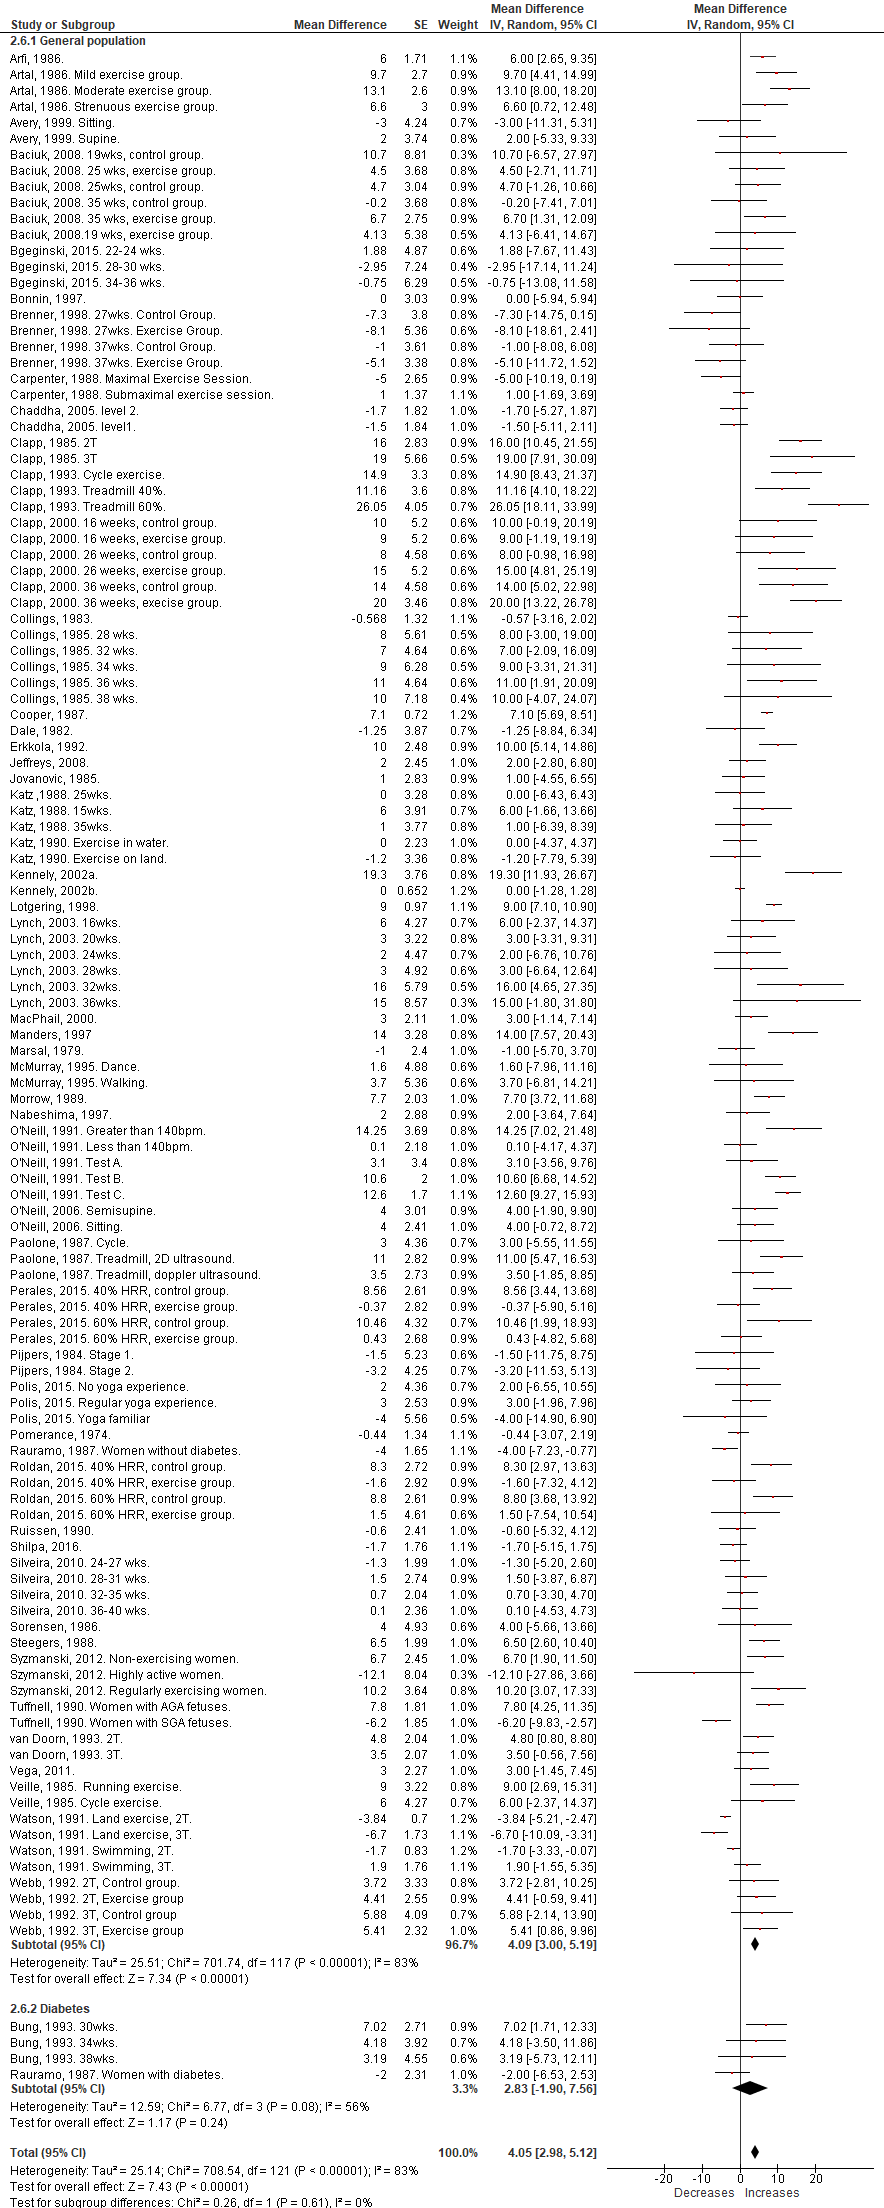


*Online Supplement Figure 9.* Effect of acute prenatal exercise on fetal heart rate (FHR) following exercise. Data reported as a mean difference compared to baseline, resting conditions. Subgroup analysis were comparing women with diabetes compared to women without diabetes. Analysis conducted using a random effects model. SE, standard error; IV, inverse variance, AGA, average for gestational age; SGA, small for gestational age, 2T, second trimester; 3T, third trimester; EX, exercise group; CTRL, control group; HRR, heart rate reserve.


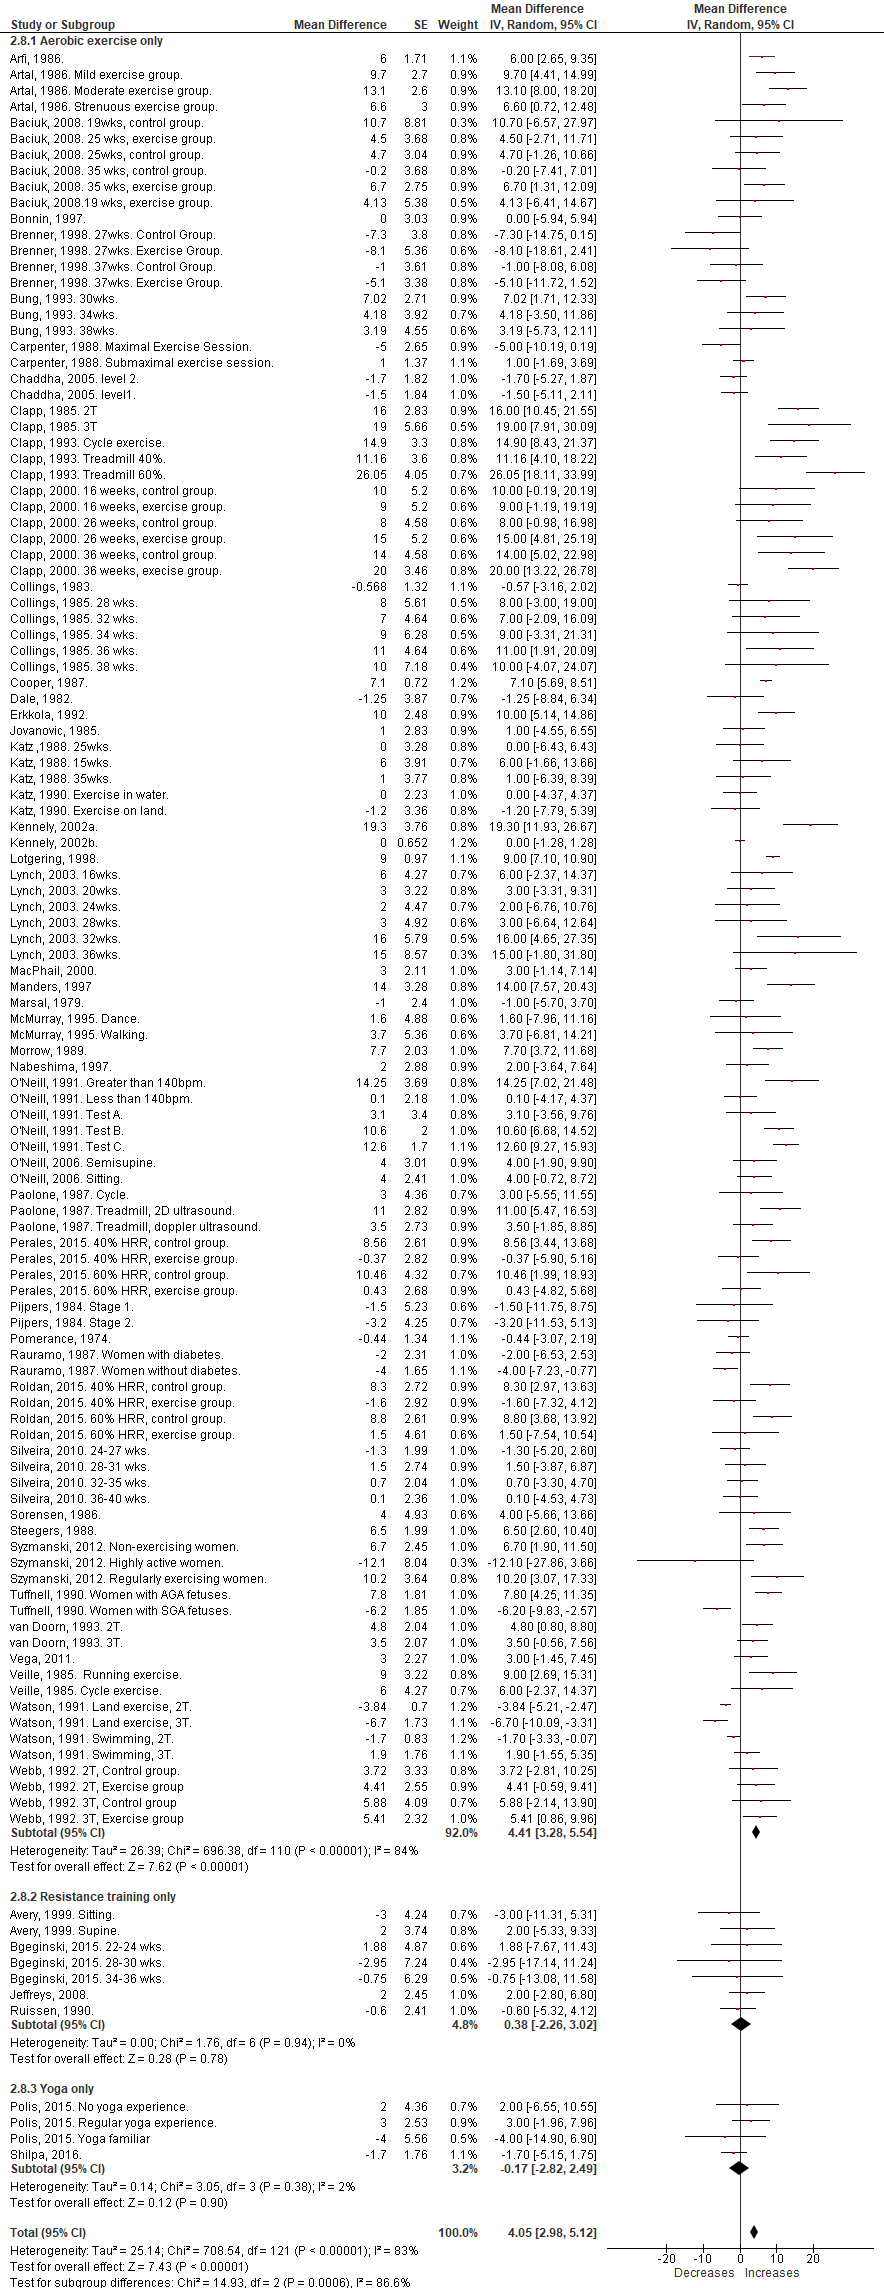


*Online Supplement Figure 10.* Effect of acute prenatal exercise on fetal heart rate (FHR) following exercise. Data reported as a mean difference compared to baseline, resting conditions. Subgroup analysis were comparing different exercise modalities. Analysis conducted using a random effects model. SE, standard error; IV, inverse variance, AGA, average for gestational age; SGA, small for gestational age, 2T, second trimester; 3T, third trimester; EX, exercise group; CTRL, control group; HRR, heart rate reserve.


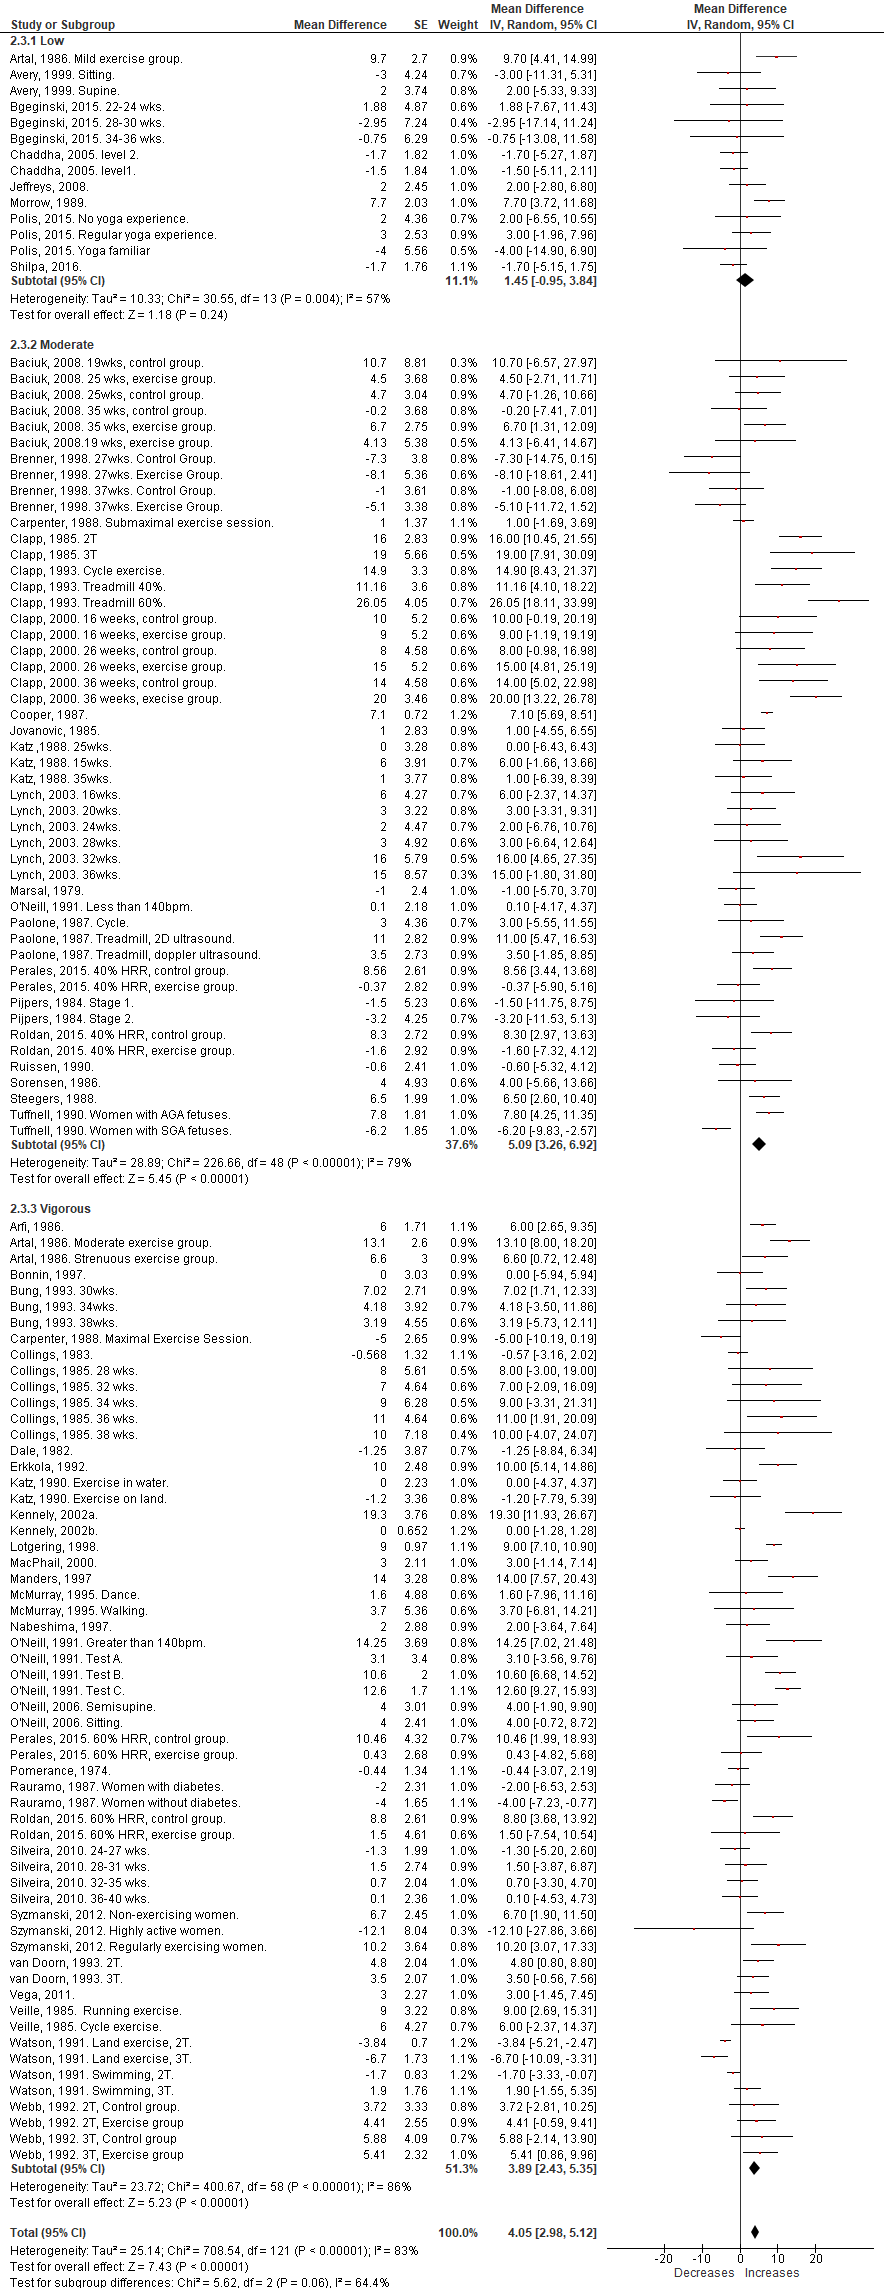


*Online Supplement Figure 11.* Effect of acute prenatal exercise on fetal heart rate (FHR) following exercise. Data reported as a mean difference compared to baseline, resting conditions. Subgroup analysis were comparing women who were exercising at different intensities. Analysis conducted using a random effects model. SE, standard error; IV, inverse variance, AGA, average for gestational age; SGA, small for gestational age, 2T, second trimester; 3T, third trimester; EX, exercise group; CTRL, control group; HRR, heart rate reserve.


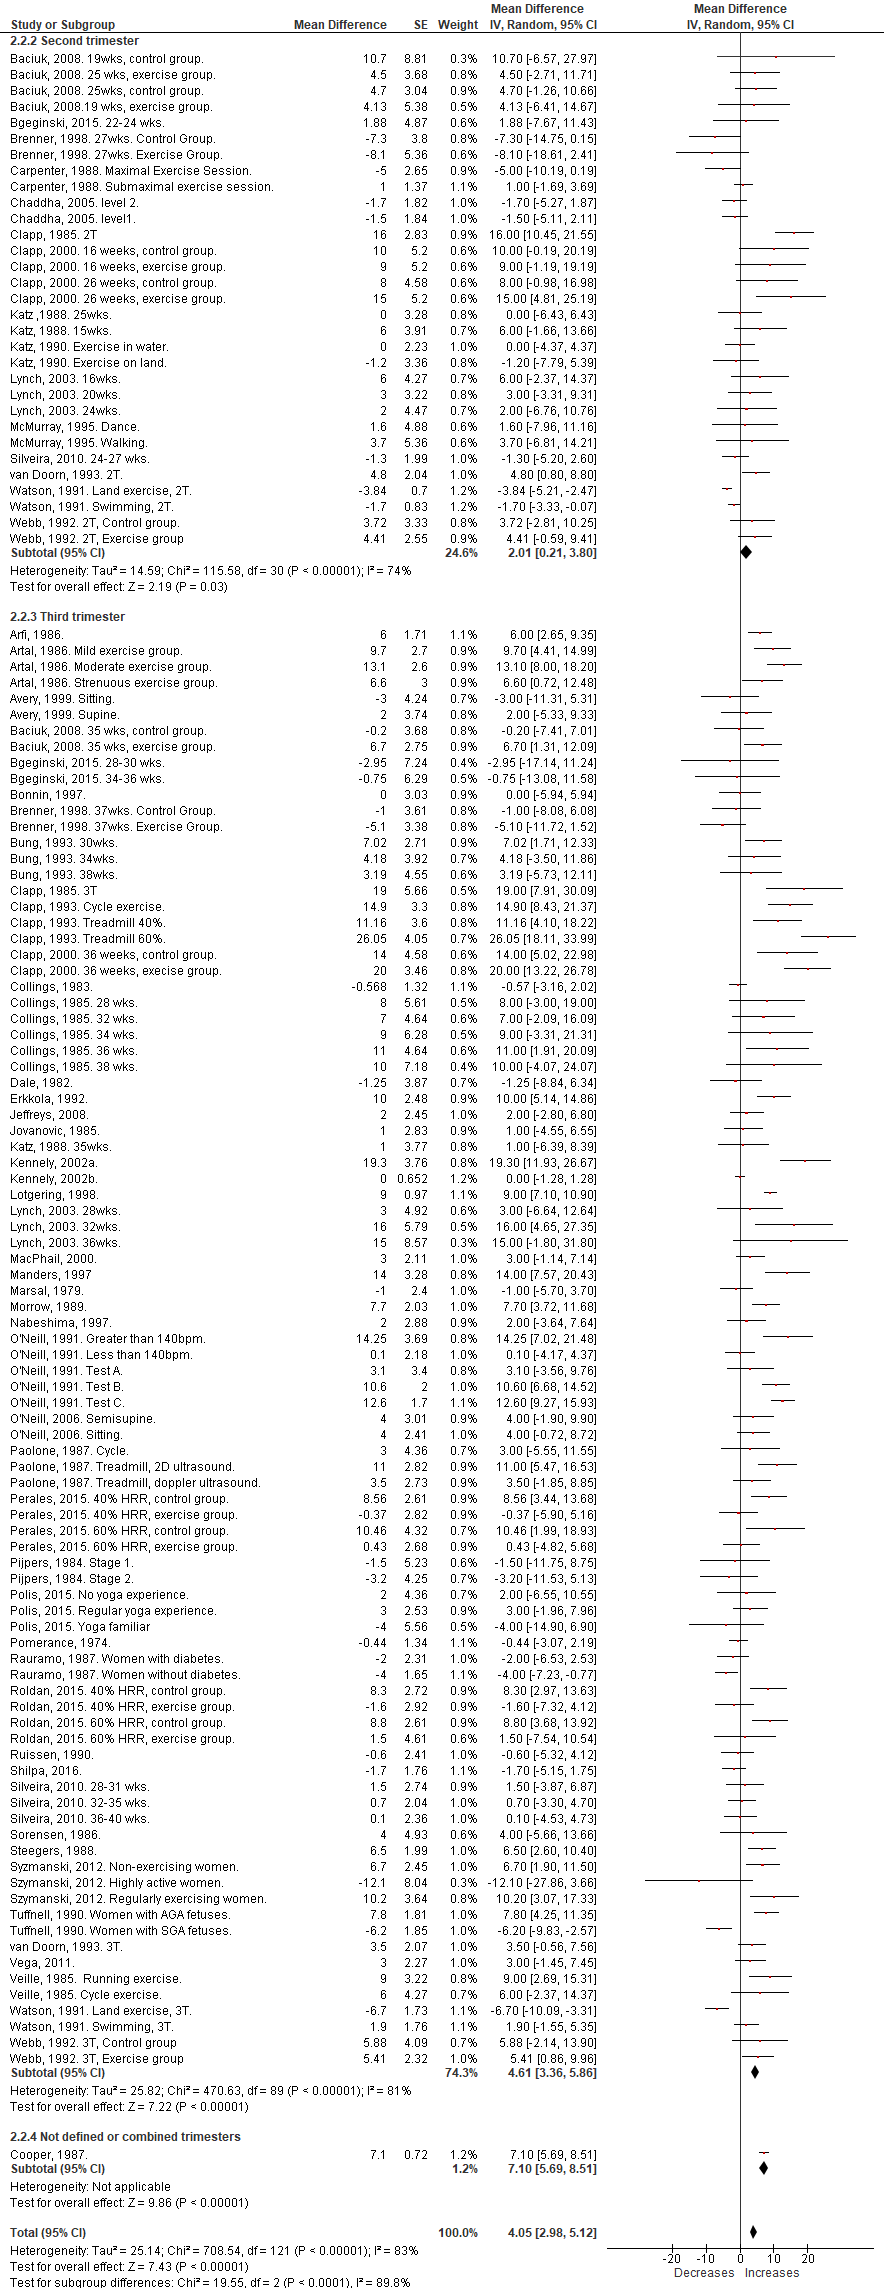


*Online Supplement Figure 12.* Effect of acute prenatal exercise on fetal heart rate (FHR) following exercise. Data reported as a mean difference compared to baseline, resting conditions. Subgroup analysis were comparing women who were exercising in different trimesters. Analysis conducted using a random effects model. SE, standard error; IV, inverse variance, AGA, average for gestational age; SGA, small for gestational age, 2T, second trimester; 3T, third trimester; EX, exercise group; CTRL, control group; HRR, heart rate reserve.


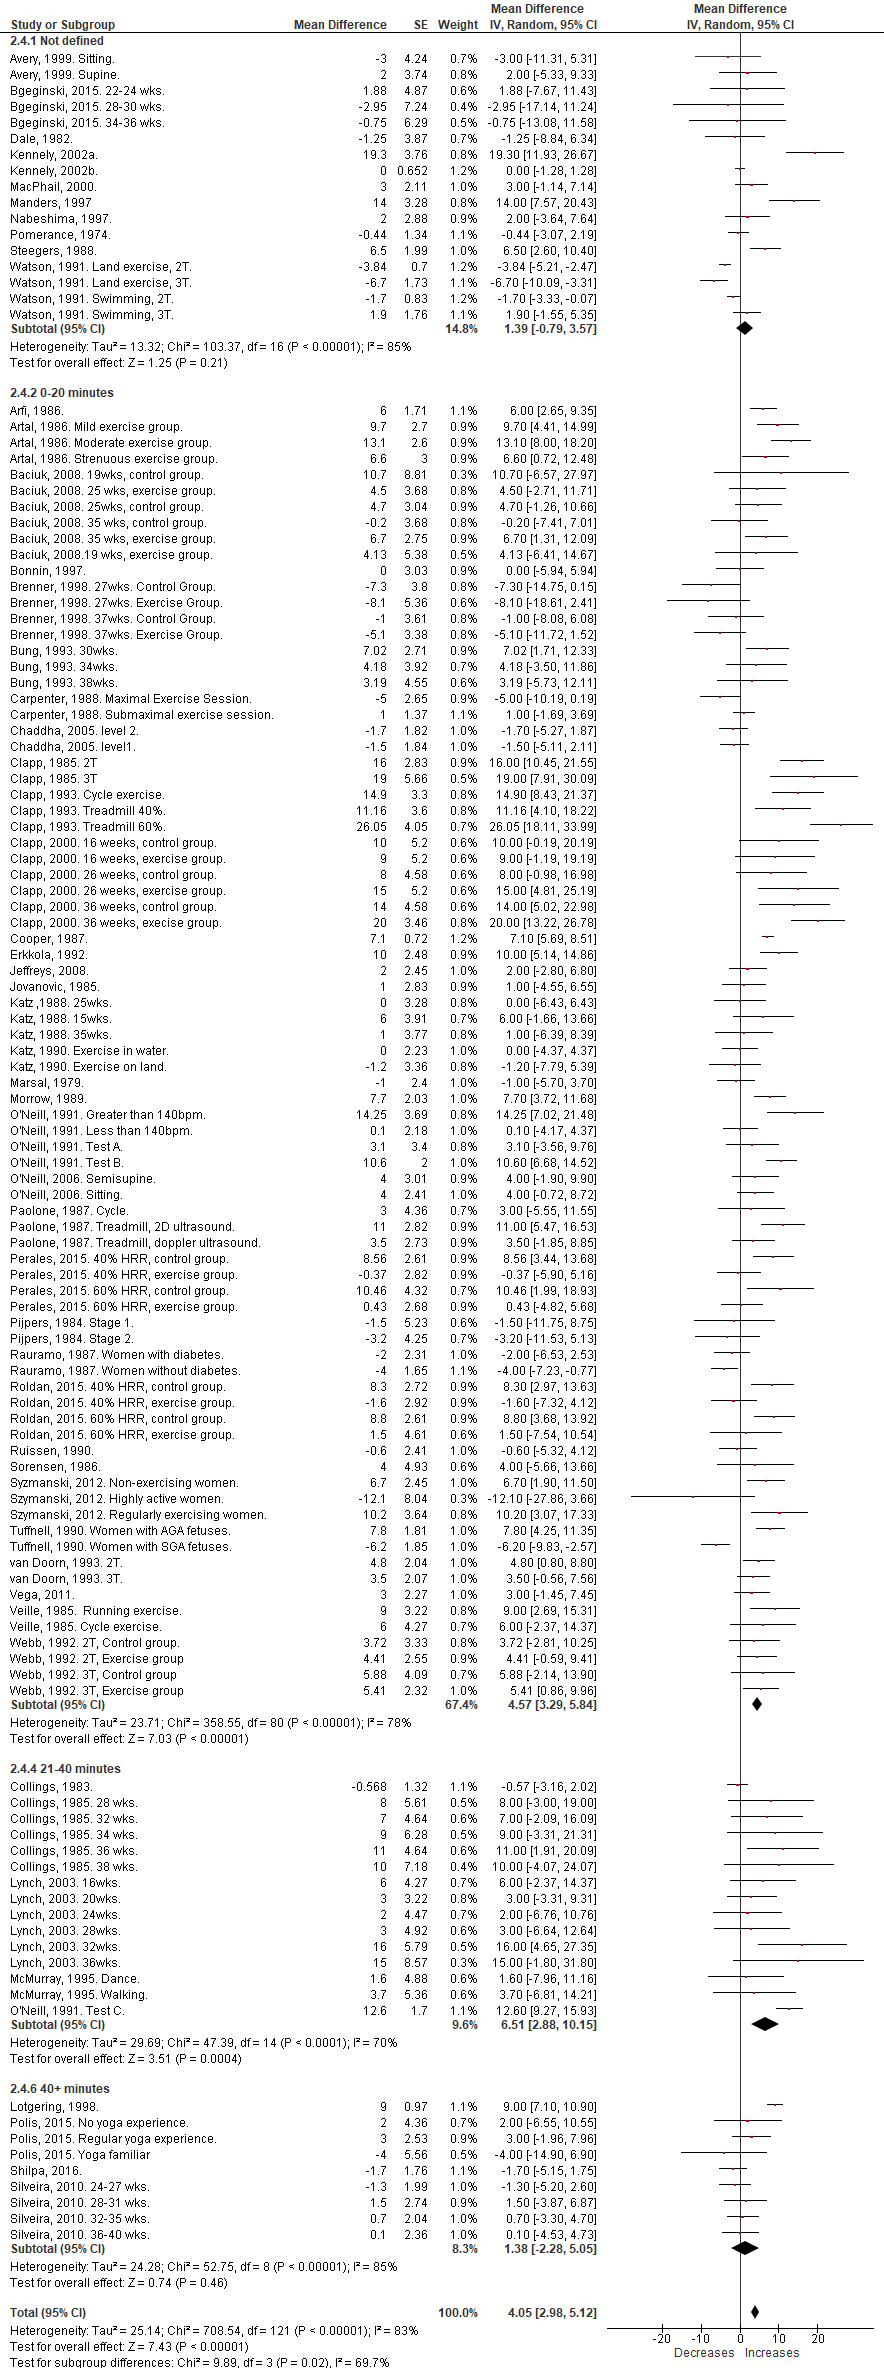


*Online Supplement Figure 13.* Effect of acute prenatal exercise on fetal heart rate (FHR) following exercise. Data reported as a mean difference compared to baseline, resting conditions. Subgroup analysis were comparing women who were exercising for different durations. Analysis conducted using a random effects model. SE, standard error; IV, inverse variance, AGA, average for gestational age; SGA, small for gestational age, 2T, second trimester; 3T, third trimester; EX, exercise group; CTRL, control group; HRR, heart rate reserve.


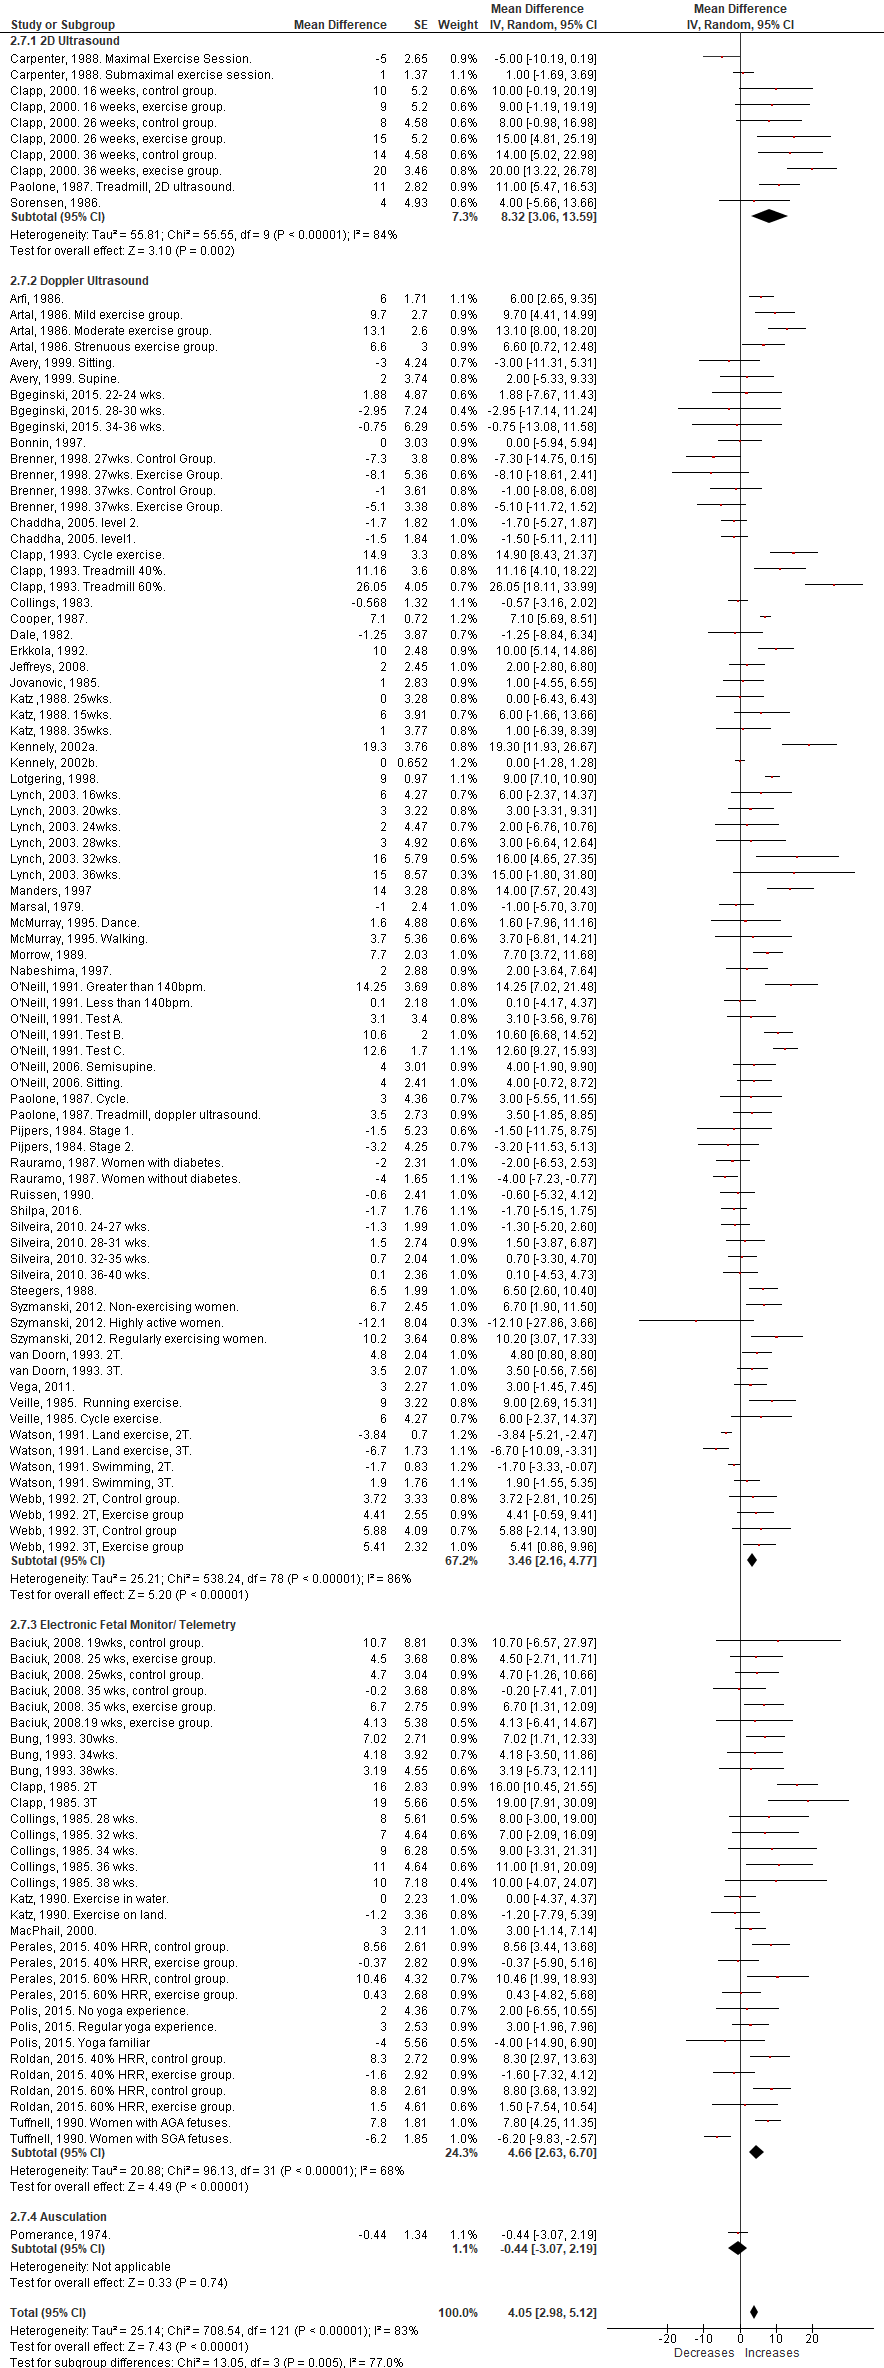


*Online Supplement Figure 14.* Effect of acute prenatal exercise on fetal heart rate (FHR) following exercise. Data reported as a mean difference compared to baseline, resting conditions. Subgroup analysis were comparing different methods for measuring FHR. Analysis conducted using a random effects model. SE, standard error; IV, inverse variance, AGA, average for gestational age; SGA, small for gestational age, 2T, second trimester; 3T, third trimester; EX, exercise group; CTRL, control group; HRR, heart rate reserve.

## Fetal heart rate responses to chronic exercise


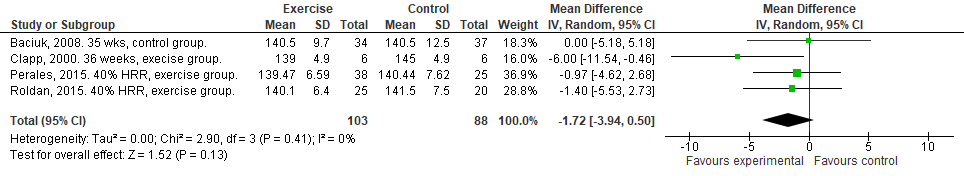


*Online Supplement Figure 15.* Randomized controlled trials examining the impact of prenatal exercise on resting fetal heart rate (FHR) post-intervention. All studies were “exercise only” trials. FHR was reported in beats per minute. Analyses conducted with a random effects model. CI, confidence interval; df, degrees of freedom; IV, inverse variance; HRR, heart rate reserve.


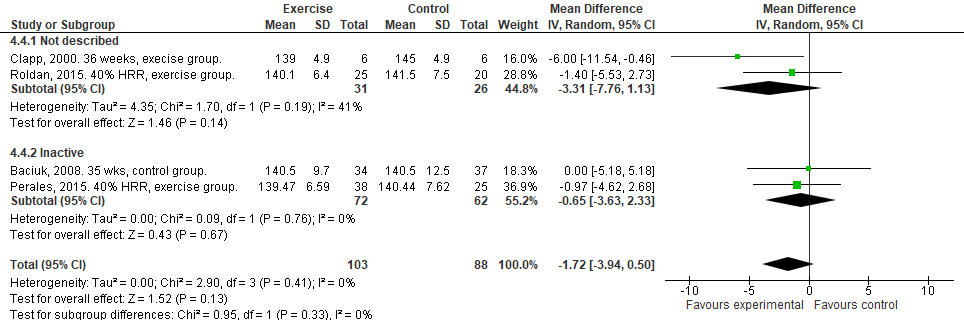


*Online Supplement Figure 16.* Randomized controlled trials examining the impact of prenatal exercise on resting fetal heart rate (FHR) post-intervention. Subgroup analysis separating women who were previously inactive. FHR was reported in beats per minute. Analyses conducted with a random effects model. CI, confidence interval; df, degrees of freedom; IV, inverse variance; HRR, heart rate reserve.


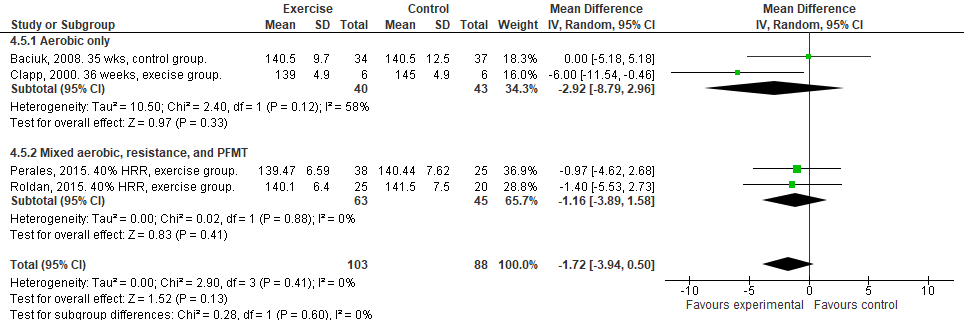


*Online Supplement Figure 17.* Randomized controlled trials examining the impact of prenatal exercise on resting fetal heart rate (FHR) post-intervention. FHR was reported in beats per minute. Subgroup analysis separating studies by type of exercise during intervention. Analyses conducted with a random effects model. CI, confidence interval; df, degrees of freedom; IV, inverse variance; HRR, heart rate reserve.


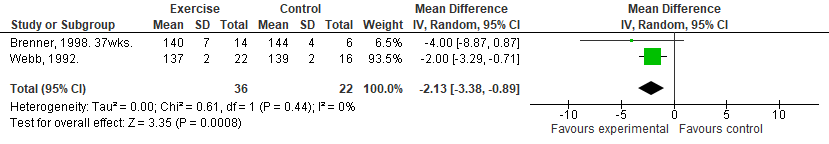


*Online Supplement Figure 18*. Non-randomized exercise interventions examining the impact of prenatal exercise on resting fetal heart rate (FHR) post-intervention. FHR was reported in beats per minute. Analyses conducted with a random effects model. CI, confidence interval; df, degrees of freedom; IV, inverse variance.


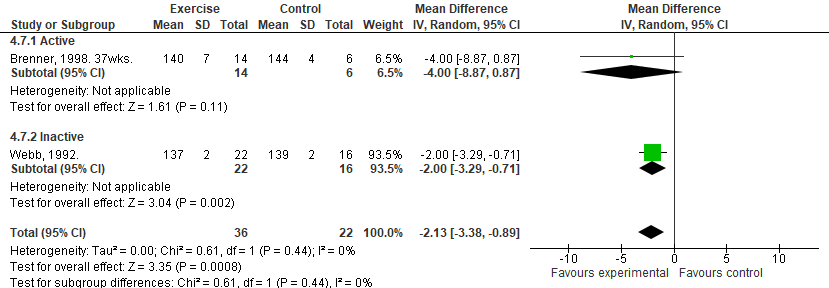


*Online Supplement Figure 19*. Non-randomized exercise interventions examining the impact of prenatal exercise on resting fetal heart rate (FHR) post-intervention. FHR was reported in beats per minute. Subgroup analysis separating women by previous physical activity levels. Analyses conducted with a random effects model. CI, confidence interval; df, degrees of freedom; IV, inverse variance.


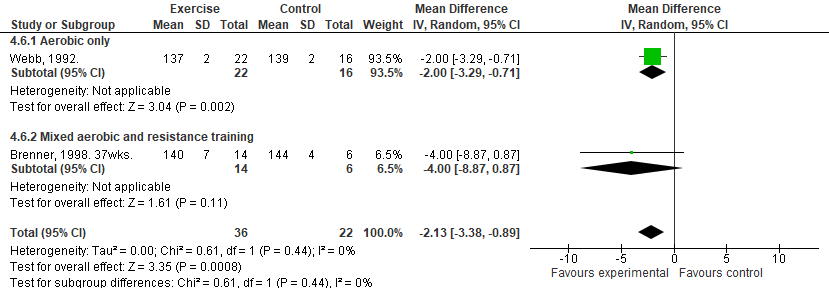


*Online Supplement Figure 20*. Non-randomized exercise interventions examining the impact of prenatal exercise on resting fetal heart rate (FHR) post-intervention. FHR was reported in beats per minute. Subgroup analysis separating studies by type of exercise during intervention. Analyses conducted with a random effects model. CI, confidence interval; df, degrees of freedom; IV, inverse variance.


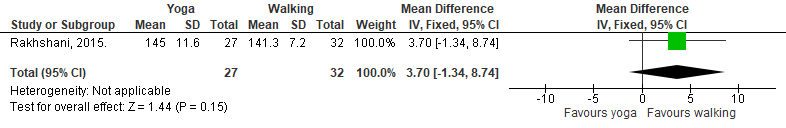


*Online Supplement Figure 21.* Superiority trial examining the impact of prenatal exercise on resting fetal heart rate (FHR) post-intervention comparing women enrolled in a yoga program to a walking program. FHR was reported in beats per minute. Analyses conducted with a random effects model. CI, confidence interval; df, degrees of freedom; IV, inverse variance.


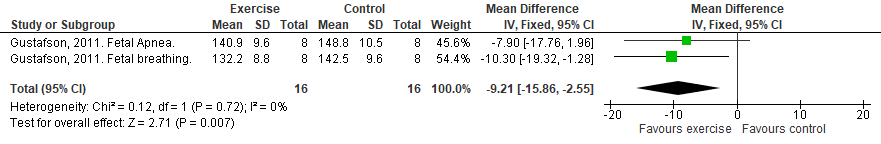


*Online Supplement Figure 22*. Cohort study examining the impact of prenatal exercise on resting fetal heart rate (FHR) post-intervention. FHR was reported in beats per minute. Analyses conducted with a random effects model. CI, confidence interval; df, degrees of freedom; IV, inverse variance.


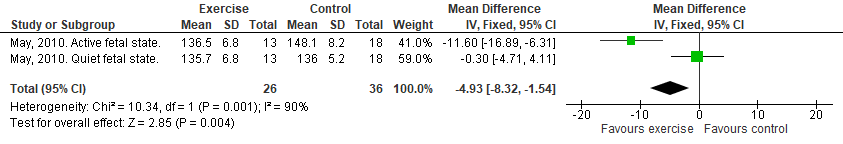


*Online Supplement Figure 23*. Cross-sectional study examining the impact of prenatal exercise on resting fetal heart rate (FHR) post-intervention. FHR was reported in beats per minute. Analyses conducted with a random effects model. CI, confidence interval; df, degrees of freedom; IV, inverse variance.


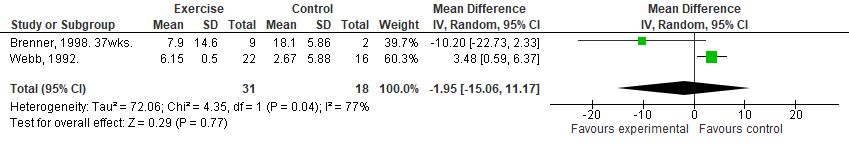


*Online Supplement Figure 24*. Non-randomized exercise interventions examining the impact of prenatal exercise on the fetal heart rate (FHR) response during acute exercise post-intervention. FHR response was reported as a change from pre-to-during exercise in beats per minute. Analyses conducted with a random effects model. CI, confidence interval; df, degrees of freedom; IV, inverse variance.


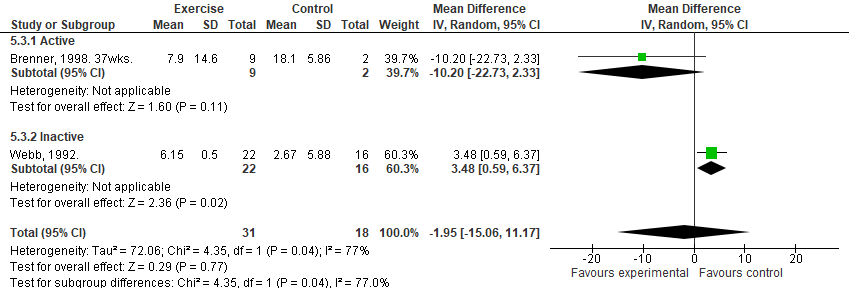


*Online Supplement Figure 25*. Non-randomized exercise interventions examining the impact of prenatal exercise on the fetal heart rate (FHR) response during acute exercise post-intervention. FHR response was reported as a change from pre-to-during exercise in beats per minute. Subgroups analysis separating women based on previous physical activity levels. Analyses conducted with a random effects model. CI, confidence interval; df, degrees of freedom; IV, inverse variance.


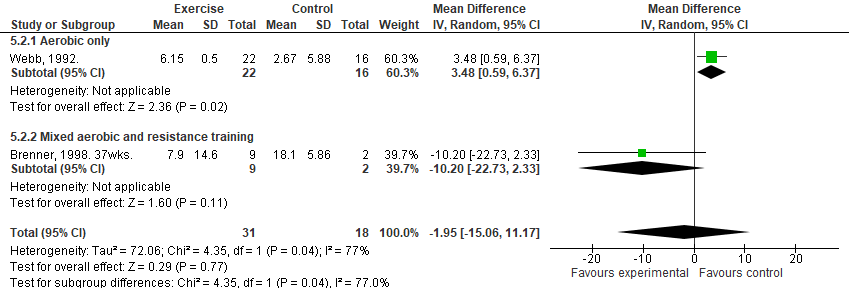


*Online Supplement Figure 26*. Non-randomized exercise interventions examining the impact of prenatal exercise on the fetal heart rate (FHR) response during acute exercise post-intervention. FHR response was reported as a change from pre-to-during exercise in beats per minute. Subgroups analysis separating studies by type of exercise during intervention. Analyses conducted with a random effects model. CI, confidence interval; df, degrees of freedom; IV, inverse variance.


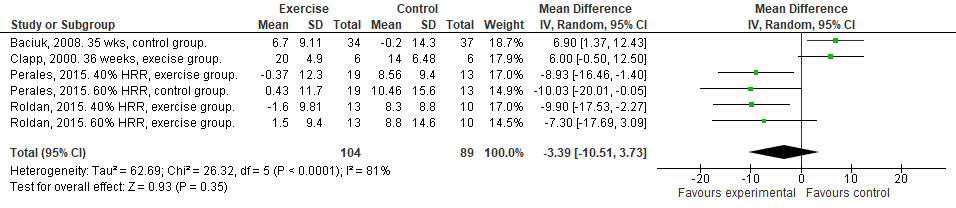


*Online Supplement Figure 27.* Randomized controlled trials examining the impact of prenatal exercise on the fetal heart rate (FHR) response following acute exercise post-intervention. FHR response was reported as a change from pre-to-post exercise in beats per minute. Analyses conducted with a random effects model. CI, confidence interval; df, degrees of freedom; IV, inverse variance; HRR, heart rate reserve.


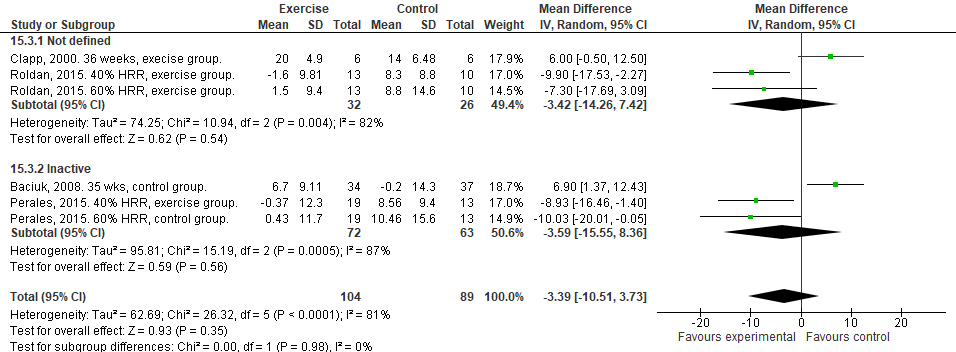


*Online Supplement Figure 28.* Randomized controlled trials examining the impact of prenatal exercise on the fetal heart rate (FHR) response following acute exercise post-intervention. FHR response was reported as a change from pre-to-post exercise in beats per minute. Subgroup analysis separating women who were previously inactive. Analyses conducted with a random effects model. CI, confidence interval; df, degrees of freedom; IV, inverse variance; HRR, heart rate reserve.


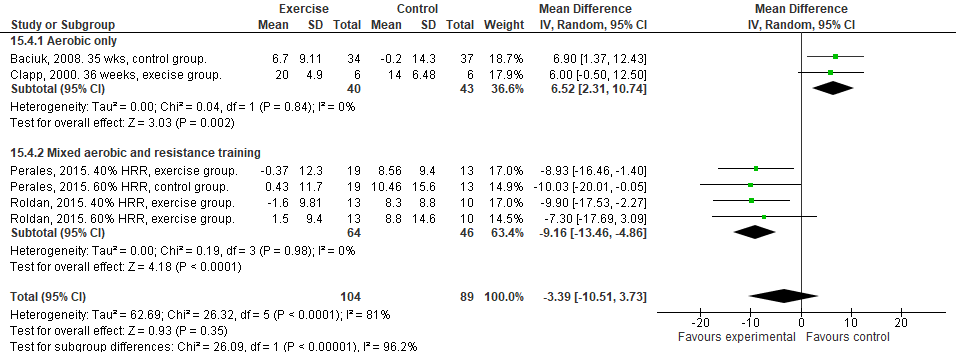


*Online Supplement Figure 29.* Randomized controlled trials examining the impact of prenatal exercise on the fetal heart rate (FHR) response following acute exercise post-intervention. FHR response was reported as a change from pre-to-post exercise in beats per minute. Subgroup analysis separating studies by type of exercise during intervention. Analyses conducted with a random effects model. CI, confidence interval; df, degrees of freedom; IV, inverse variance; HRR, heart rate reserve.


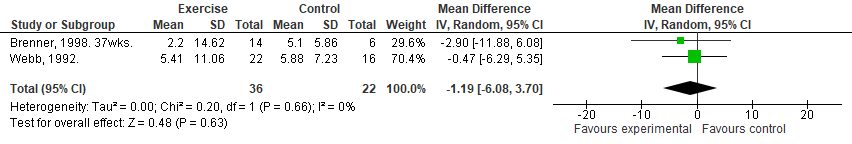


*Online Supplement Figure 30.* Non-randomized interventions examining the impact of prenatal exercise on the fetal heart rate (FHR) response following acute exercise post-intervention. FHR response was reported as a change from pre-to-post exercise in beats per minute. Analyses conducted with a random effects model. CI, confidence interval; df, degrees of freedom; IV, inverse variance.


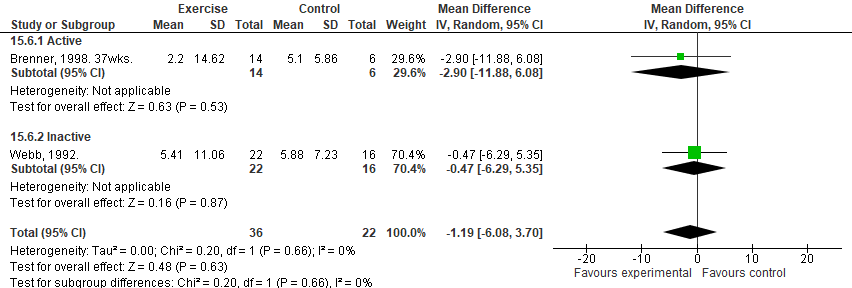


*Online Supplement Figure 31.* Non-randomized interventions examining the impact of prenatal exercise on the fetal heart rate (FHR) response following acute exercise post-intervention. FHR response was reported as a change from pre-to-post exercise in beats per minute. Subgroup analysis separating women by previous physical activity levels. Analyses conducted with a random effects model. CI, confidence interval; df, degrees of freedom; IV, inverse variance.


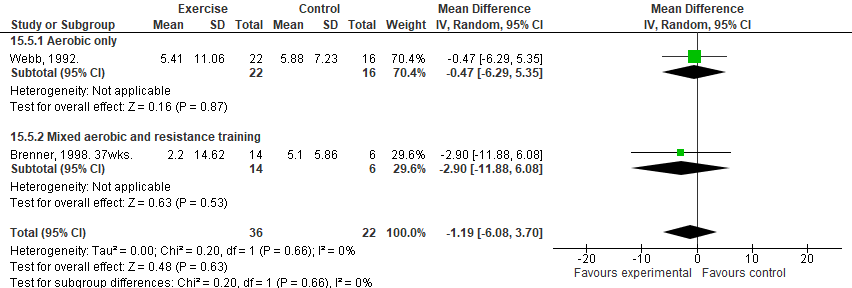


*Online Supplement Figure 32.* Non-randomized interventions examining the impact of prenatal exercise on the fetal heart rate (FHR) response following acute exercise post-intervention. FHR response was reported as a change from pre-to-post exercise in beats per minute. Subgroup analysis separating women by type of exercise. Analyses conducted with a random effects model. CI, confidence interval; df, degrees of freedom; IV, inverse variance.

## Umbilical artery during and following acute exercise


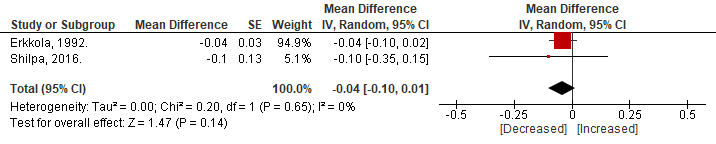


*Online Supplement Figure 33.* Effect of acute prenatal exercise on umbilical artery S/D ratio. Data presented as a mean difference from pre-to-during exercise. S/D ratio is expressed in arbitrary units. Analyses conducted with a random effects model. CI, confidence interval; df, degrees of freedom; IV, inverse variance; SE, standard error.


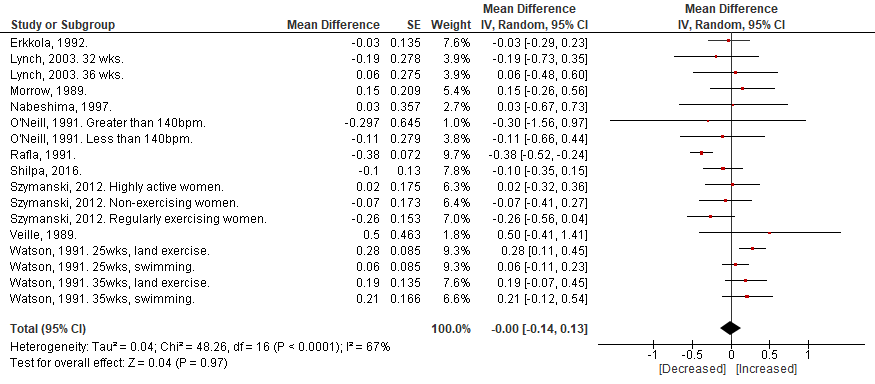


*Online Supplement Figure 34.* Effect of acute prenatal exercise on umbilical artery S/D ratio. Data presented as a mean difference from pre-to-following exercise. S/D ratio is expressed in arbitrary units. Analyses conducted with a random effects model. CI, confidence interval; df, degrees of freedom; IV, inverse variance; SE, standard error; IUGR, intrauterine growth restriction.


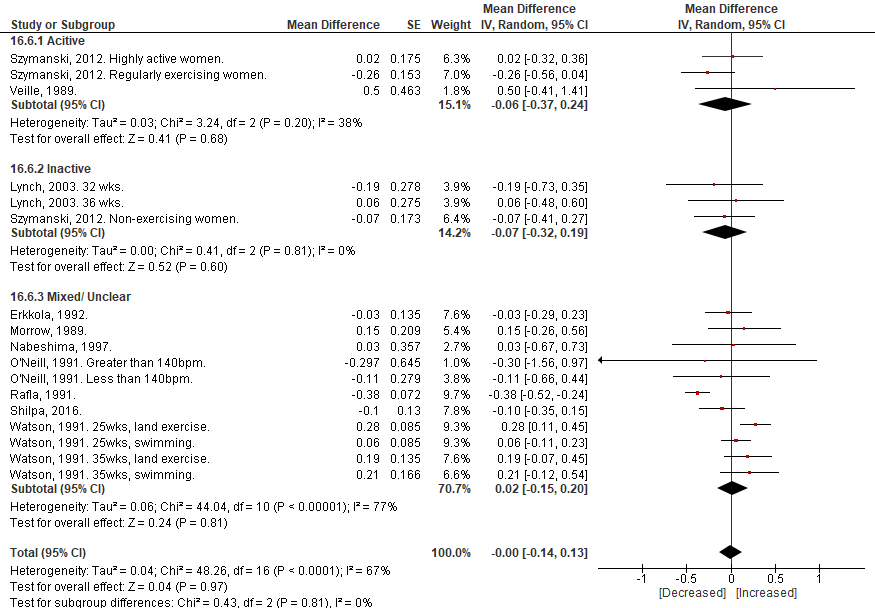


*Online Supplement Figure 35.* Effect of acute prenatal exercise on umbilical artery S/D ratio. Data presented as a mean difference from pre-to-following exercise. Subgroup analysis separating studies by previous physical activity levels. S/D ratio is expressed in arbitrary units. Analyses conducted with a random effects model. CI, confidence interval; df, degrees of freedom; IV, inverse variance; SE, standard error; IUGR, intrauterine growth restriction.


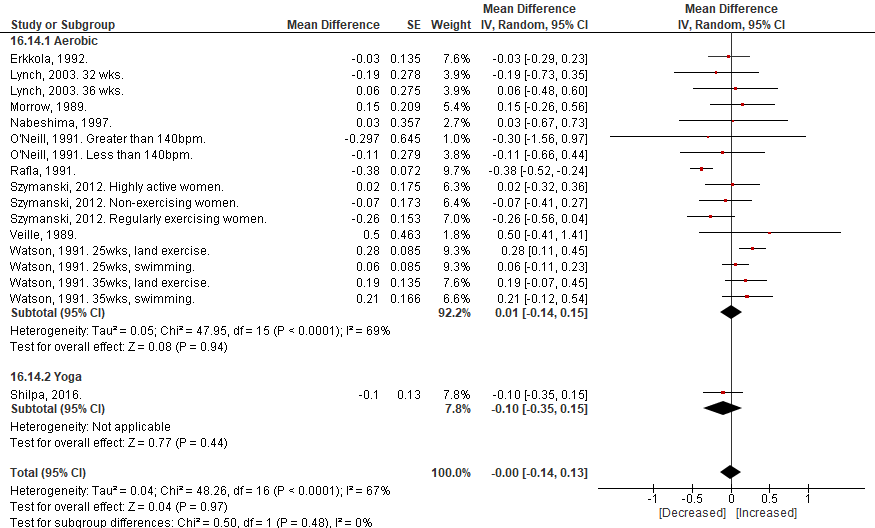


*Online Supplement Figure 36.* Effect of acute prenatal exercise on umbilical artery S/D ratio. Data presented as a mean difference from pre-to-following exercise. Subgroup analysis separating studies by type of exercise. S/D ratio is expressed in arbitrary units. Analyses conducted with a random effects model. CI, confidence interval; df, degrees of freedom; IV, inverse variance; SE, standard error; IUGR, intrauterine growth restriction.


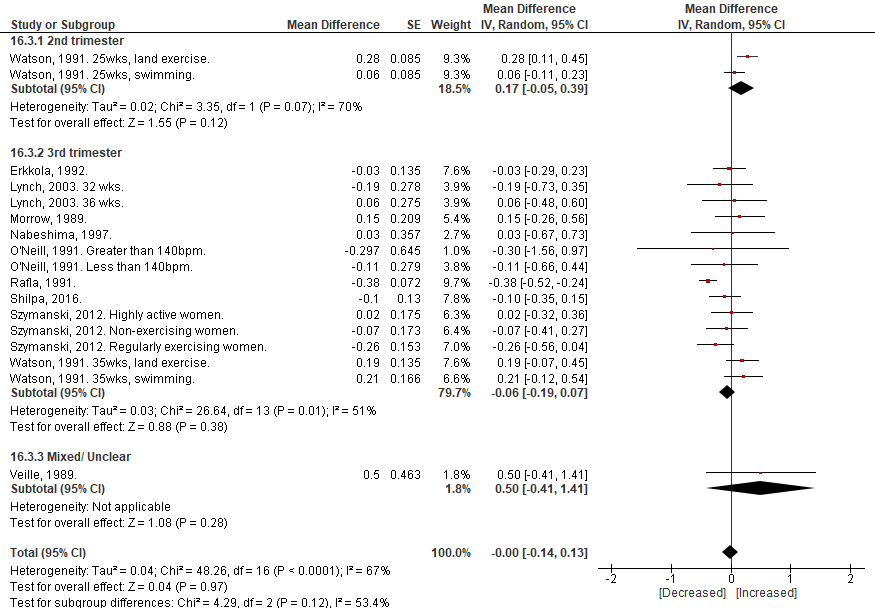


*Online Supplement Figure 37.* Effect of acute prenatal exercise on umbilical artery S/D ratio. Data presented as a mean difference from pre-to-following exercise. Subgroup analysis separating studies by trimester. S/D ratio is expressed in arbitrary units. Analyses conducted with a random effects model. CI, confidence interval; df, degrees of freedom; IV, inverse variance; SE, standard error; IUGR, intrauterine growth restriction.


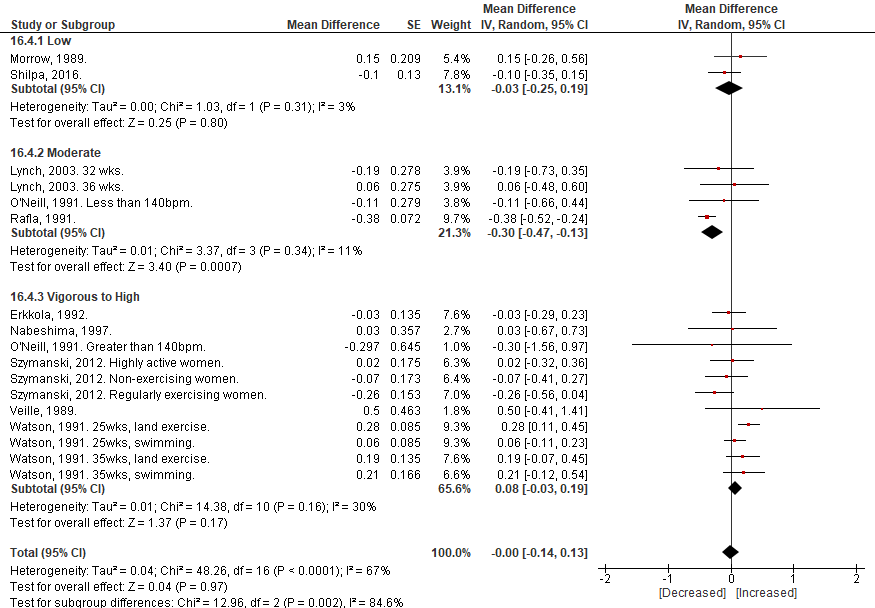


*Online Supplement Figure 38.* Effect of acute prenatal exercise on umbilical artery S/D ratio. Data presented as a mean difference from pre-to-following exercise. Subgroup analysis separating studies by intensity of exercise. S/D ratio is expressed in arbitrary units. Analyses conducted with a random effects model. CI, confidence interval; df, degrees of freedom; IV, inverse variance; SE, standard error; IUGR, intrauterine growth restriction.


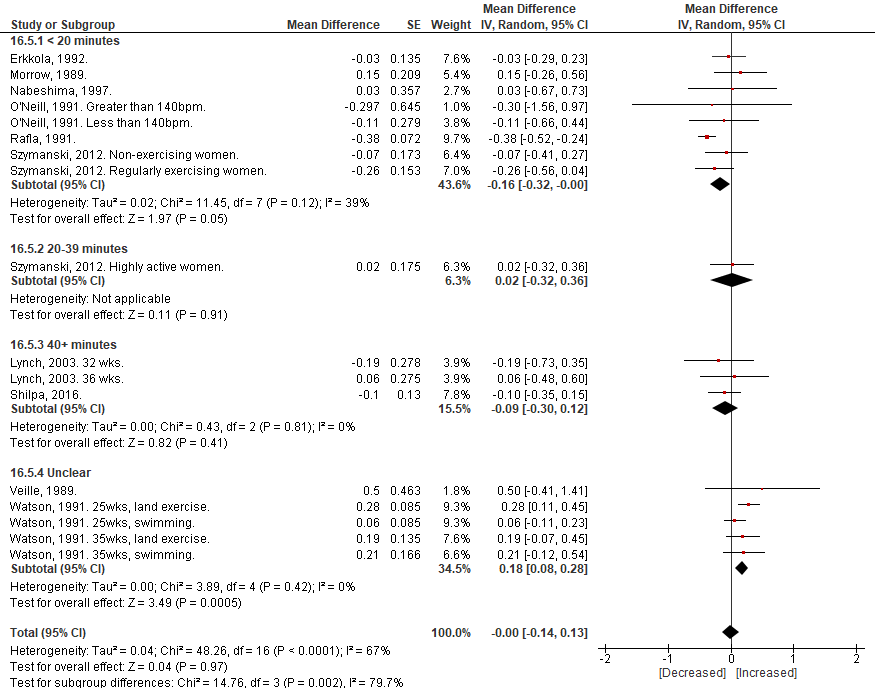


*Online Supplement Figure 39.* Effect of acute prenatal exercise on umbilical artery S/D ratio. Data presented as a mean difference from pre-to-following exercise. Subgroup analysis separating studies by duration of exercise. S/D ratio is expressed in arbitrary units. Analyses conducted with a random effects model. CI, confidence interval; df, degrees of freedom; IV, inverse variance; SE, standard error; IUGR, intrauterine growth restriction.


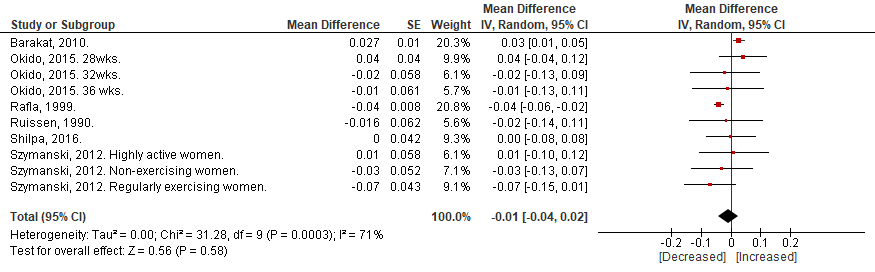


*Online Supplement Figure 40.* Effect of acute prenatal exercise on umbilical artery pulsatility index (PI). Data presented as a mean difference from pre-to-following exercise. PI is expressed in arbitrary units. Analyses conducted with a random effects model. CI, confidence interval; df, degrees of freedom; IV, inverse variance; SE, standard error.


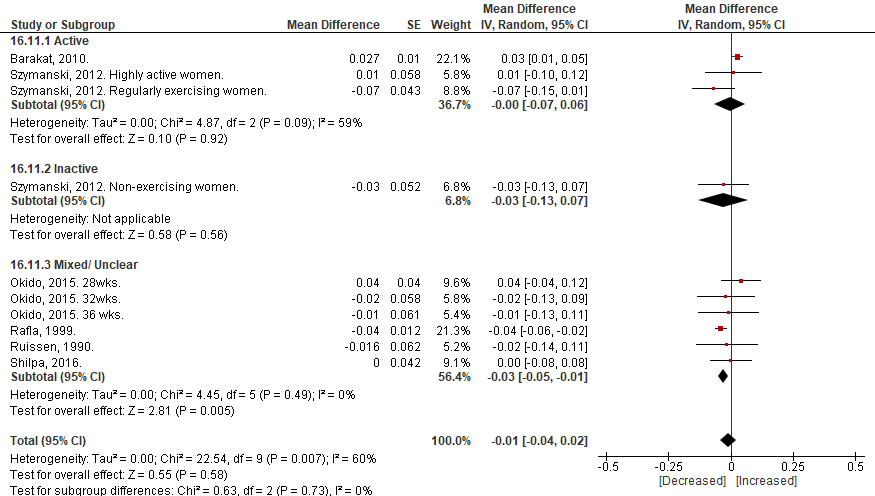


*Online Supplement Figure 41.* Effect of acute prenatal exercise on umbilical artery pulsatility index (PI). Data presented as a mean difference from pre-to-following exercise. Subgroup analysis separating studies by previous physical activity levels. PI is expressed in arbitrary units. Analyses conducted with a random effects model. CI, confidence interval; df, degrees of freedom; IV, inverse variance; SE, standard error.


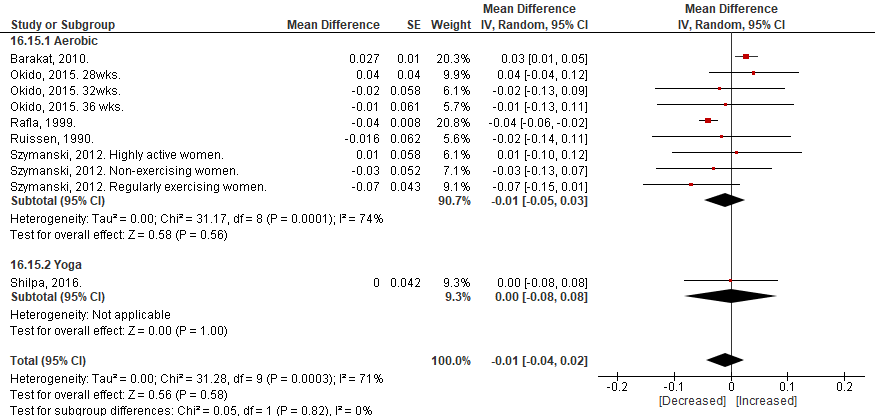


*Online Supplement Figure 42.* Effect of acute prenatal exercise on umbilical artery pulsatility index (PI). Data presented as a mean difference from pre-to-following exercise. Subgroup analysis separating studies by type of exercise. PI is expressed in arbitrary units. Analyses conducted with a random effects model. CI, confidence interval; df, degrees of freedom; IV, inverse variance; SE, standard error.

*
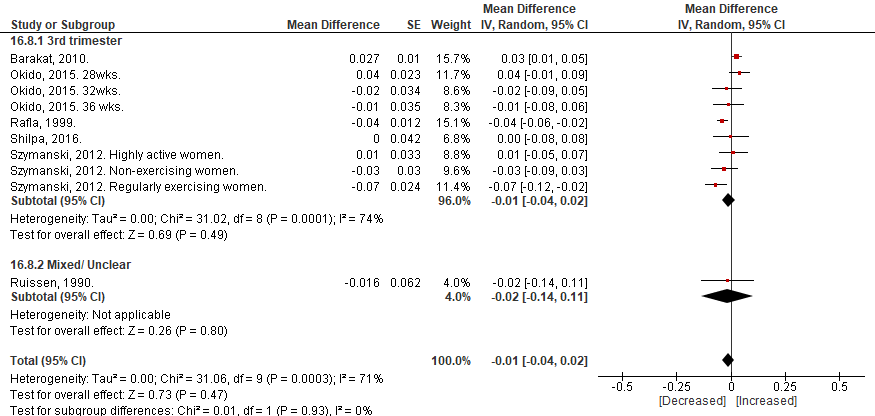
*

*Online Supplement Figure 43.* Effect of acute prenatal exercise on umbilical artery pulsatility index (PI). Data presented as a mean difference from pre-to-following exercise. Subgroup analysis separating studies by trimester. PI is expressed in arbitrary units. Analyses conducted with a random effects model. CI, confidence interval; df, degrees of freedom; IV, inverse variance; SE, standard error.


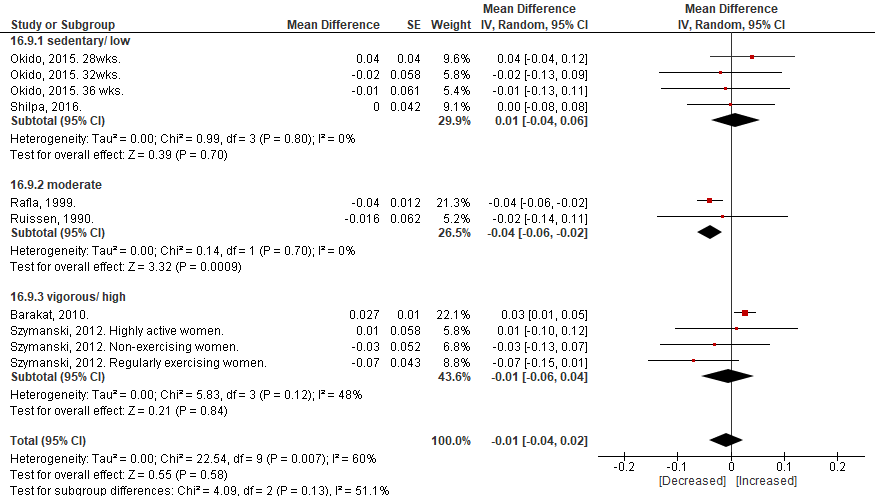


*Online Supplement Figure 44.* Effect of acute prenatal exercise on umbilical artery pulsatility index (PI). Data presented as a mean difference from pre-to-following exercise. Subgroup analysis separating studies by intensity. PI is expressed in arbitrary units. Analyses conducted with a random effects model. CI, confidence interval; df, degrees of freedom; IV, inverse variance; SE, standard error.


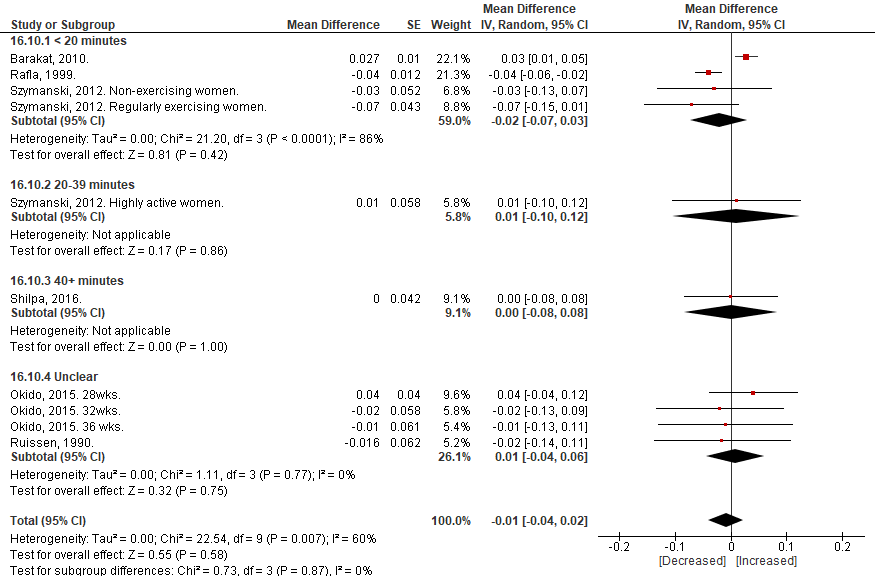


*Online Supplement Figure 45.* Effect of acute prenatal exercise on umbilical artery pulsatility index (PI). Data presented as a mean difference from pre-to-following exercise. Subgroup analysis separating studies by duration of exercise. PI is expressed in arbitrary units. Analyses conducted with a random effects model. CI, confidence interval; df, degrees of freedom; IV, inverse variance; SE, standard error.


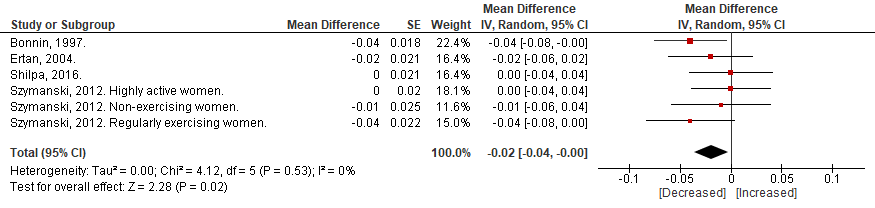


*Online Supplement Figure 46.* Effect of acute prenatal exercise on umbilical artery resistance index (RI). Data presented as a mean difference from pre-to-following exercise. RI is expressed in arbitrary units. Analyses conducted with a random effects model. CI, confidence interval; df, degrees of freedom; IV, inverse variance; SE, standard error; IUGR, intrauterine growth restriction.


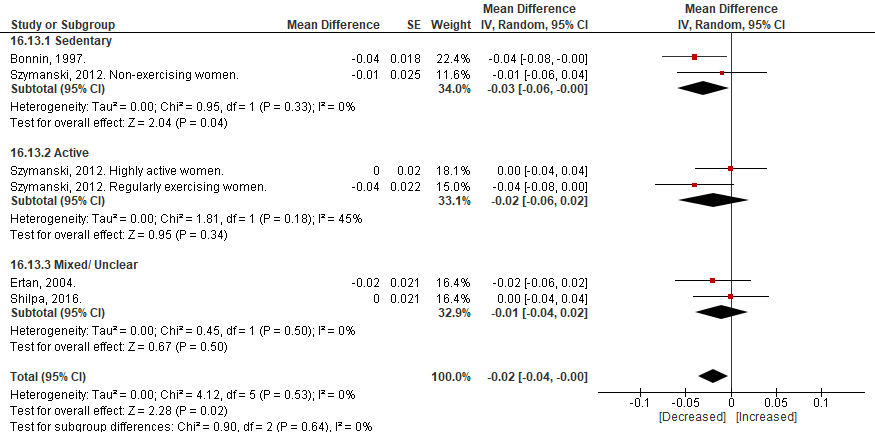


*Online Supplement Figure 47.* Effect of acute prenatal exercise on umbilical artery resistance index (RI). Data presented as a mean difference from pre-to-following exercise. Subgroup analysis separating studies by previous physical activity levels. RI is expressed in arbitrary units. Analyses conducted with a random effects model. CI, confidence interval; df, degrees of freedom; IV, inverse variance; SE, standard error; IUGR, intrauterine growth restriction.


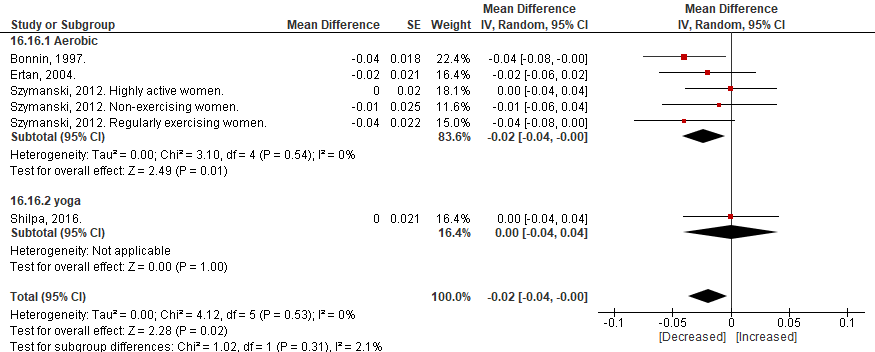


*Online Supplement Figure 48.* Effect of acute prenatal exercise on umbilical artery resistance index (RI). Data presented as a mean difference from pre-to-following exercise. Subgroup analysis separating studies by types of exercise. RI is expressed in arbitrary units. Analyses conducted with a random effects model. CI, confidence interval; df, degrees of freedom; IV, inverse variance; SE, standard error; IUGR, intrauterine growth restriction.


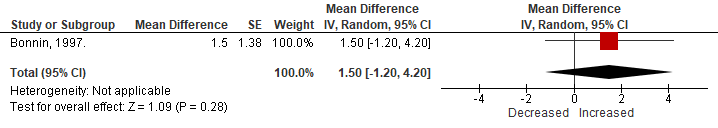


*Online Supplement Figure 49.* Effect of acute prenatal exercise on umbilical artery mean blood velocity (Vmean). Data presented as a mean difference from pre-to-following exercise. Subgroup analysis separating studies by types of exercise. Vmean is expressed in cm/s. Analyses conducted with a random effects model. CI, confidence interval; df, degrees of freedom; IV, inverse variance; SE, standard error; IUGR, intrauterine growth restriction.

## Umbilical artery responses to chronic exercise


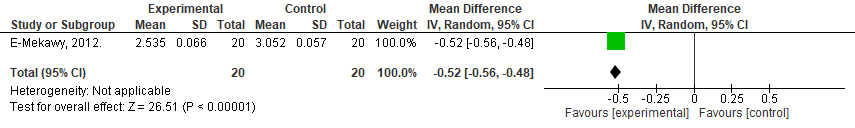
*Online Supplement Figure 50.* Randomized controlled trial reporting on the effect of prenatal exercise intervention compared to control on umbilical artery systolic/diastolic ratio (S/D) at rest. Analyses conducted with a random effects model. CI, confidence interval; df, degrees of freedom; IV, inverse variance; SE, standard error.


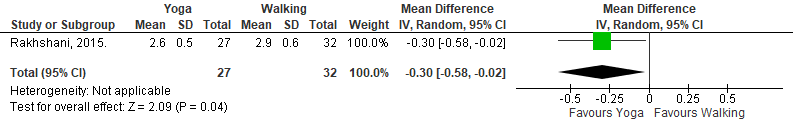


*Online Supplement Figure 51.* Superiority trial (randomized controlled trial) reporting on the effect of prenatal yoga compared with walking interventions on umbilical artery systolic/diastolic ratio (S/D) at rest. Analyses conducted with a random effects model. CI, confidence interval; df, degrees of freedom; IV, inverse variance; SE, standard error.


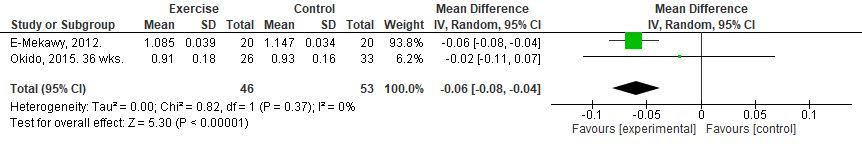


*Online Supplement Figure 52.* Randomized controlled trial reporting on the effect of prenatal exercise intervention compared to control on umbilical artery pulsatility index at rest. Analyses conducted with a random effects model. CI, confidence interval; df, degrees of freedom; IV, inverse variance; SE, standard error.


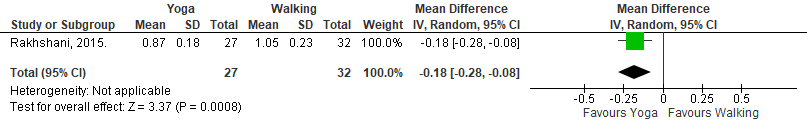


*Online Supplement Figure 53.* Superiority trial (randomized controlled trial) reporting on the effect of prenatal yoga compared to walking interventions on umbilical artery pulsatility index at rest. Analyses conducted with a random effects model. CI, confidence interval; df, degrees of freedom; IV, inverse variance; SE, standard error.


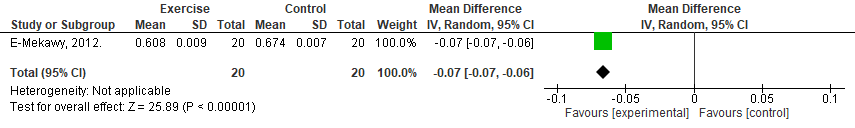


*Online Supplement Figure 54.* Randomized controlled trial reporting on the effect of prenatal exercise intervention compared to control on umbilical artery resistance index at rest. Analyses conducted with a random effects model. CI, confidence interval; df, degrees of freedom; IV, inverse variance; SE, standard error.


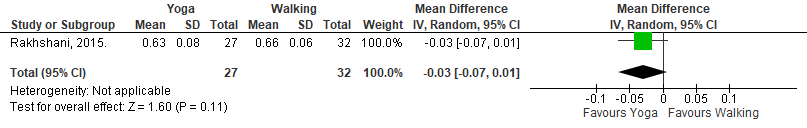


*Online Supplement Figure 55.* Superiority trial (randomized controlled trial) reporting on the effect of prenatal yoga compared to walking interventions on umbilical artery resistance index at rest. Analyses conducted with a random effects model. CI, confidence interval; df, degrees of freedom; IV, inverse variance; SE, standard error.

## Uterine artery during and following acute exercise


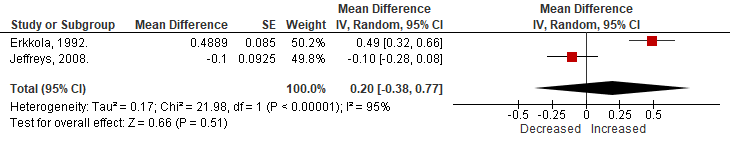
*Online Supplement Figure 56.* Effect of acute prenatal exercise on uterine artery S/D ratio. Data presented as a mean difference from pre-to-during exercise. S/D ratio is expressed in arbitrary units. Analyses conducted with a random effects model. CI, confidence interval; df, degrees of freedom; IV, inverse variance; SE, standard error.


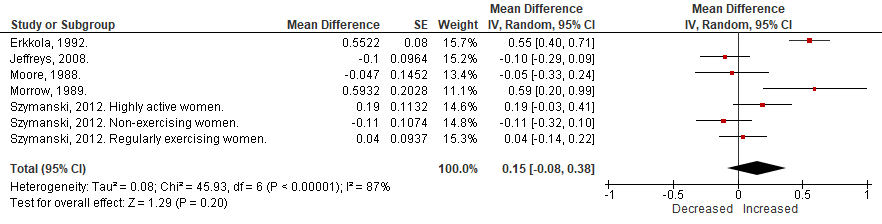
*Online Supplement Figure 57.* Effect of acute prenatal exercise on uterine artery S/D ratio. Data presented as a mean difference from pre-to-following exercise. S/D ratio is expressed in arbitrary units. Analyses conducted with a random effects model. CI, confidence interval; df, degrees of freedom; IV, inverse variance; SE, standard error.

*
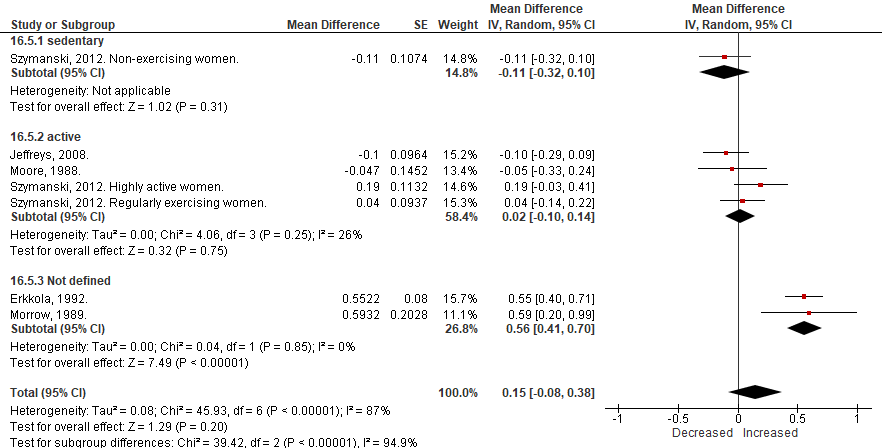
Online Supplement Figure 58.* Effect of acute prenatal exercise on uterine artery S/D ratio. Data presented as a mean difference from pre-to-following exercise. S/D ratio is expressed in arbitrary units. Subgroup analysis separating studies by previous physical activity levels. Analyses conducted with a random effects model. CI, confidence interval; df, degrees of freedom; IV, inverse variance; SE, standard error.

*
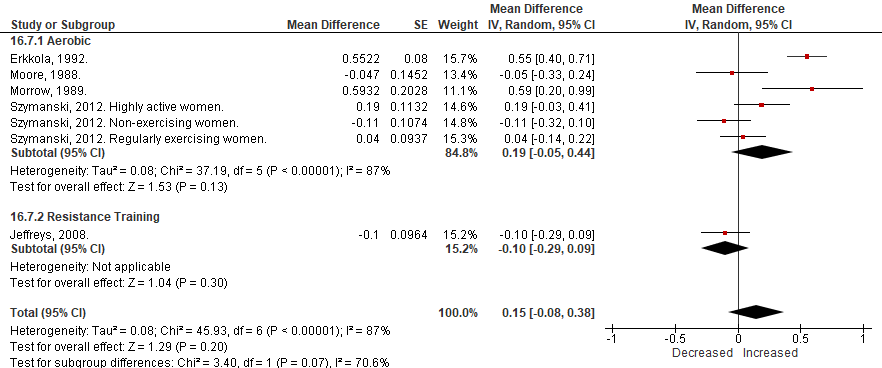
*

*Online Supplement Figure 59.* Effect of acute prenatal exercise on uterine artery S/D ratio. Data presented as a mean difference from pre-to-following exercise. S/D ratio is expressed in arbitrary units. Subgroup analysis separating studies by type of exercise. Analyses conducted with a random effects model. CI, confidence interval; df, degrees of freedom; IV, inverse variance; SE, standard error.

*
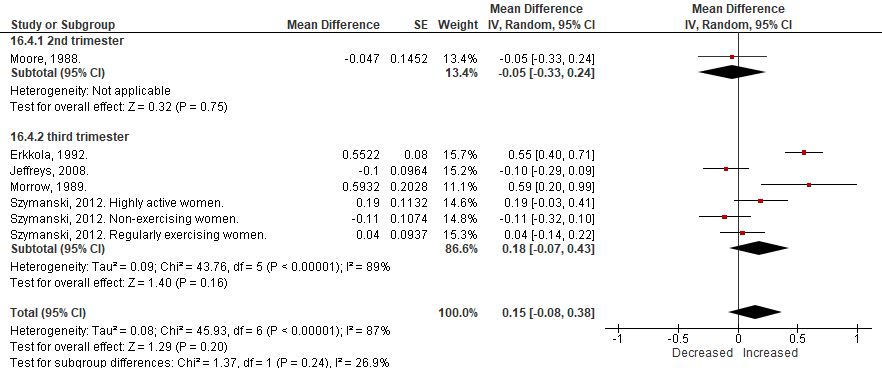
Online Supplement Figure 60.* Effect of acute prenatal exercise on uterine artery S/D ratio. Data presented as a mean difference from pre-to-following exercise. S/D ratio is expressed in arbitrary units. Subgroup analysis separating studies by trimester. Analyses conducted with a random effects model. CI, confidence interval; df, degrees of freedom; IV, inverse variance; SE, standard error.

*
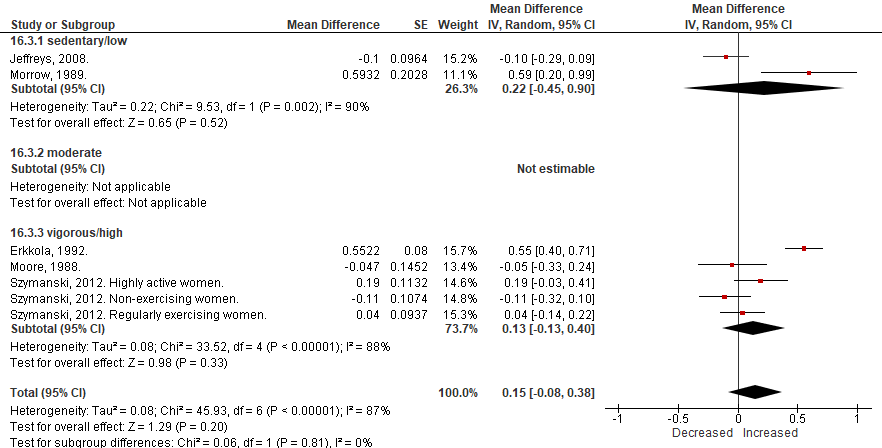
*

*Online Supplement Figure 61.* Effect of acute prenatal exercise on uterine artery S/D ratio. Data presented as a mean difference from pre-to-following exercise. S/D ratio is expressed in arbitrary units. Subgroup analysis separating studies by intensity of exercise. Analyses conducted with a random effects model. CI, confidence interval; df, degrees of freedom; IV, inverse variance; SE, standard error.

*
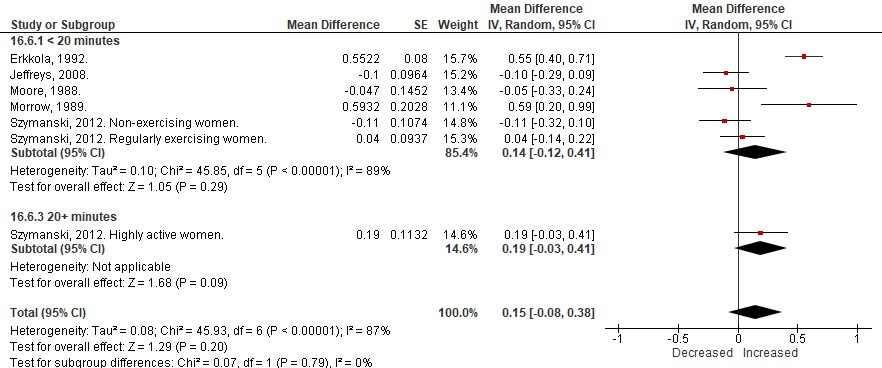
*

*Online Supplement Figure 62.* Effect of acute prenatal exercise on uterine artery S/D ratio. Data presented as a mean difference from pre-to-following exercise. S/D ratio is expressed in arbitrary units. Subgroup analysis separating studies by duration of exercise. Analyses conducted with a random effects model. CI, confidence interval; df, degrees of freedom; IV, inverse variance; SE, standard error.

*
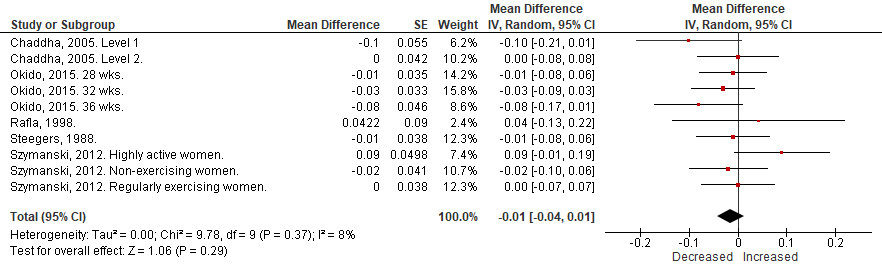
Online Supplement Figure 63.* Effect of acute prenatal exercise on uterine artery pulsatility index (PI). Data presented as a mean difference from pre-to-following exercise. PI is expressed in arbitrary units. Analyses conducted with a random effects model. CI, confidence interval; df, degrees of freedom; IV, inverse variance; SE, standard error; UPVI, uteroplacental vessel insufficiency.*
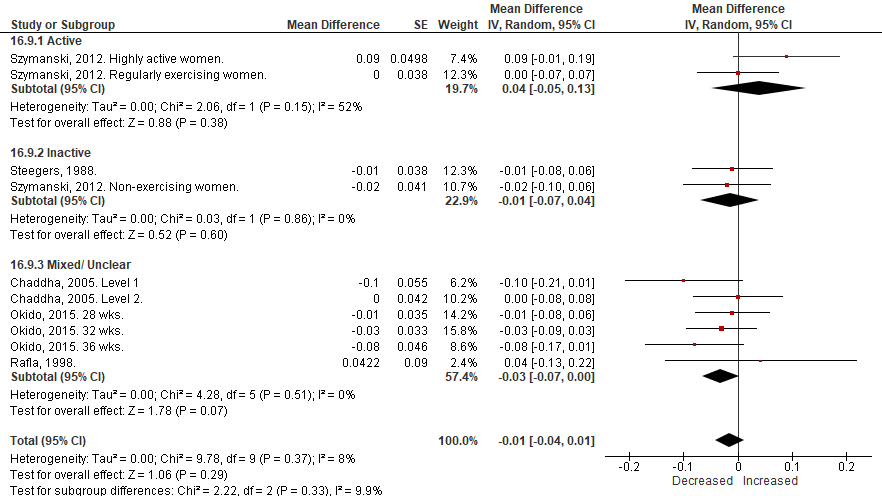
Online Supplement Figure 64.* Effect of acute prenatal exercise on uterine artery pulsatility index (PI). Data presented as a mean difference from pre-to-following exercise. PI is expressed in arbitrary units. Subgroup analysis separating studies by previous physical activity levels. Analyses conducted with a random effects model. CI, confidence interval; df, degrees of freedom; IV, inverse variance; SE, standard error; UPVI, uteroplacental vessel insufficiency.

*
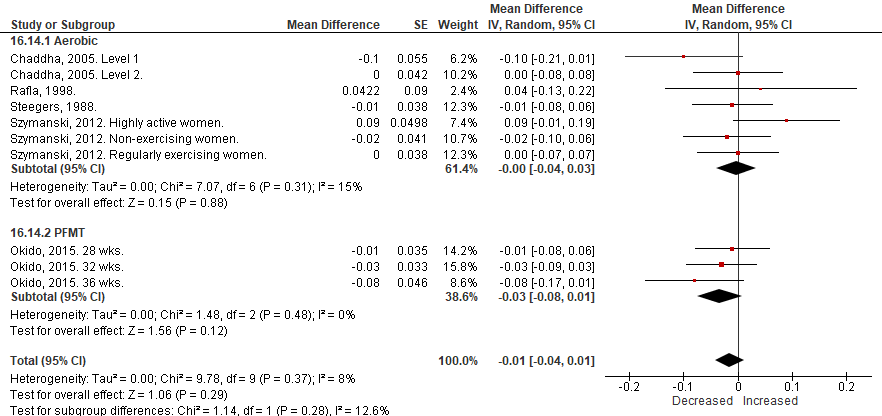
*

*Online Supplement Figure 65.* Effect of acute prenatal exercise on uterine artery pulsatility index (PI). Data presented as a mean difference from pre-to-following exercise. PI is expressed in arbitrary units. Subgroup analysis separating studies by type of exercise. Analyses conducted with a random effects model. CI, confidence interval; df, degrees of freedom; IV, inverse variance; SE, standard error; PFMT, pelvic floor muscle training; UPVI, uteroplacental vessel insufficiency.

*
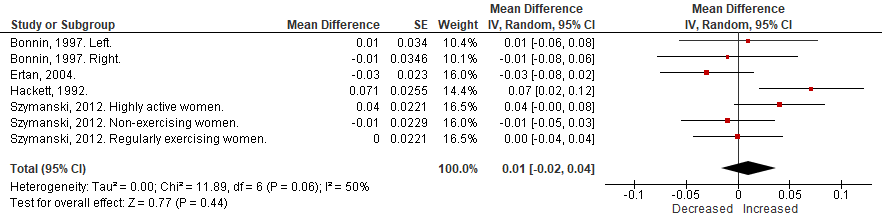
Online Supplement Figure 66.* Effect of acute prenatal exercise on uterine artery resistance index (RI). Data presented as a mean difference from pre-to-following exercise. RI is expressed in arbitrary units. Analyses conducted with a random effects model. CI, confidence interval; df, degrees of freedom; IV, inverse variance; SE, standard error; IUGR, intrauterine growth restriction.
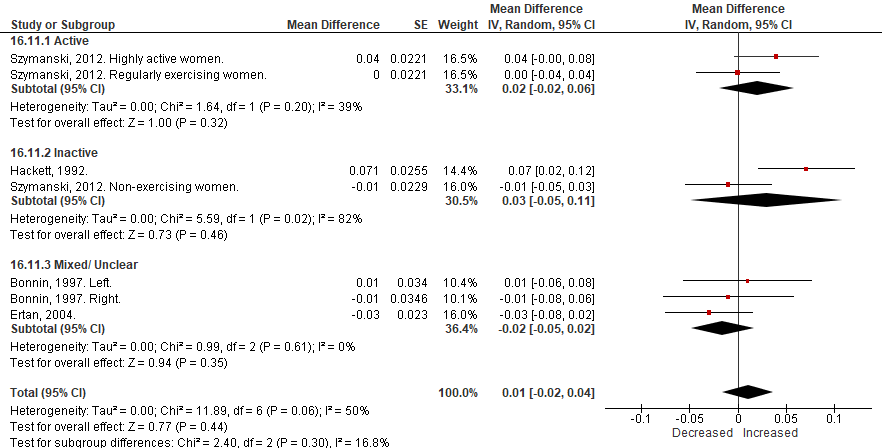
 *Online Supplement Figure 67.* Effect of acute prenatal exercise on uterine artery resistance index (RI). Data presented as a mean difference from pre-to-following exercise. RI is expressed in arbitrary units. Subgroup analysis separating studies by previous physical activity levels. Analyses conducted with a random effects model. CI, confidence interval; df, degrees of freedom; IV, inverse variance; SE, standard error; IUGR, intrauterine growth restriction.

*
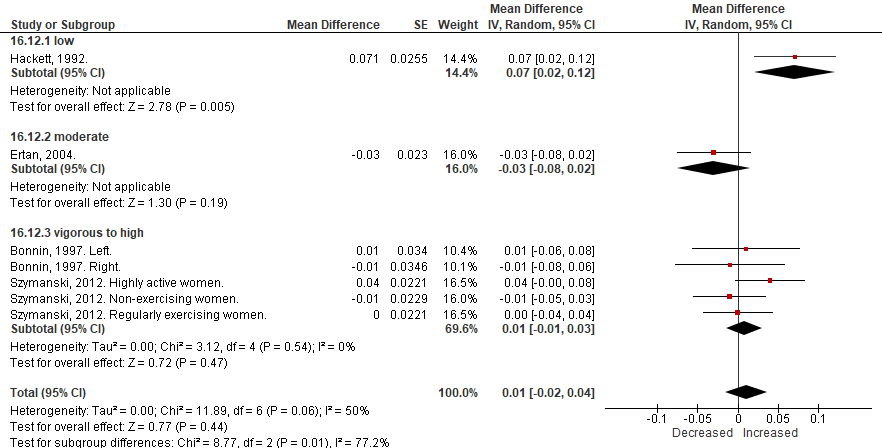
Online Supplement Figure 68.* Effect of acute prenatal exercise on uterine artery resistance index (RI). Data presented as a mean difference from pre-to-following exercise. RI is expressed in arbitrary units. Subgroup analysis separating studies by intensity of exercise. Analyses conducted with a random effects model. CI, confidence interval; df, degrees of freedom; IV, inverse variance; SE, standard error; IUGR, intrauterine growth restriction.


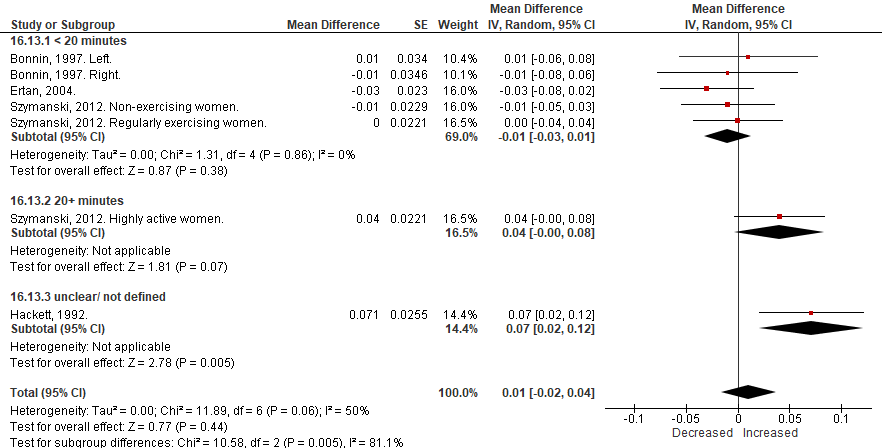


*Online Supplement Figure 69.* Effect of acute prenatal exercise on uterine artery resistance index (RI). Data presented as a mean difference from pre-to-following exercise. RI is expressed in arbitrary units. Subgroup analysis separating studies by duration of exercise. Analyses conducted with a random effects model. CI, confidence interval; df, degrees of freedom; IV, inverse variance; SE, standard error; IUGR, intrauterine growth restriction.


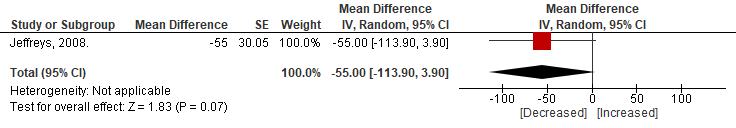


*Online Supplement Figure 70.* Effect of acute prenatal exercise on uterine artery volumetric blood flow. Data presented as a mean difference from pre-to-during exercise. Volumetric blood flow is expressed in ml/min. Analyses conducted with a random effects model. CI, confidence interval; df, degrees of freedom; IV, inverse variance; SE, standard error.


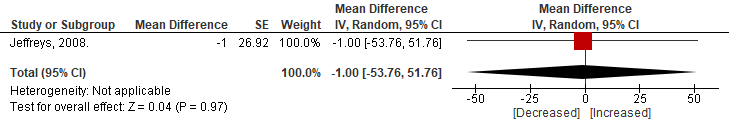


*Online Supplement Figure 71.* Effect of acute prenatal exercise on uterine artery volumetric blood flow. Data presented as a mean difference from pre-to-following exercise. Volumetric blood flow is expressed in ml/min. Analyses conducted with a random effects model. CI, confidence interval; df, degrees of freedom; IV, inverse variance; SE, standard error.


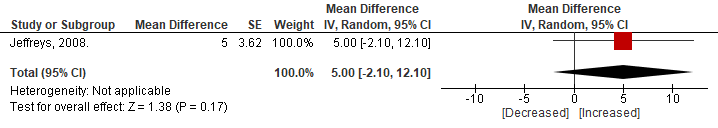


*Online Supplement Figure 72.* Effect of acute prenatal exercise on uterine artery blood velocty. Data presented as a mean difference from pre-to-during exercise. Blood velocity is expressed in cm/s. Analyses conducted with a random effects model. CI, confidence interval; df, degrees of freedom; IV, inverse variance; SE, standard error.


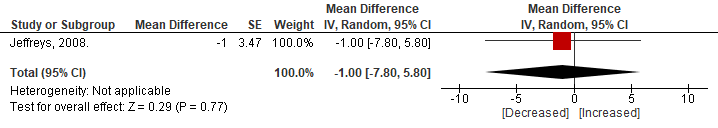


*Online Supplement Figure 73.* Effect of acute prenatal exercise on uterine artery blood velocty. Data presented as a mean difference from pre-to-following exercise. Blood velocity is expressed in cm/s. Analyses conducted with a random effects model. CI, confidence interval; df, degrees of freedom; IV, inverse variance; SE, standard error.

## Uterine artery responses to chronic exercise


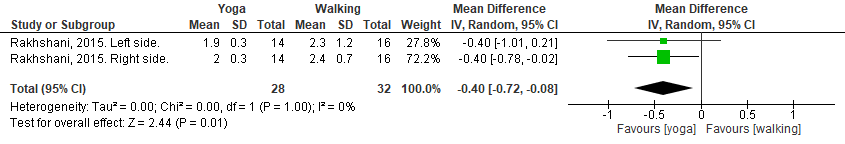
*Online Supplement Figure 74.* Superiority trial (randomized controlled trial) reporting on the effect of prenatal yoga compared with walking interventions on uterine artery systolic/diastolic ratio (S/D) at rest. Analyses conducted with a random effects model. CI, confidence interval; df, degrees of freedom; IV, inverse variance; SE, standard error.


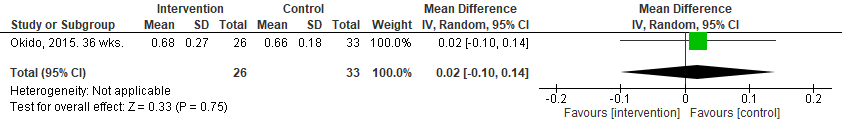
*Online Supplement Figure 75.* Randomized controlled trial reporting on the effect of prenatal exercise intervention compared to control. Analyses conducted with a random effects model. CI, confidence interval; df, degrees of freedom; IV, inverse variance; SE, standard error.


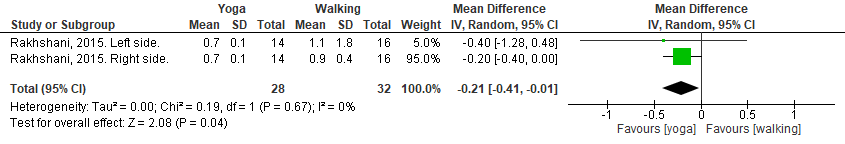


*Online Supplement Figure 76.* Superiority trial (randomized controlled trial) reporting on the effect of prenatal yoga compared with walking interventions on uterine artery pulsatility index at rest. Analyses conducted with a random effects model. CI, confidence interval; df, degrees of freedom; IV, inverse variance; SE, standard error.


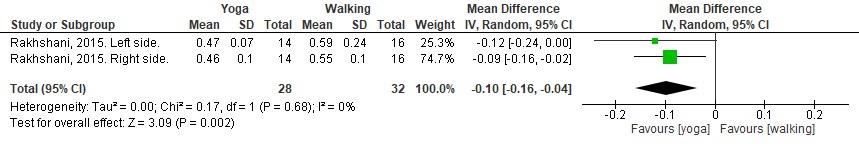


*Online Supplement Figure 77.* Superiority trial (randomized controlled trial) reporting on the effect of prenatal yoga compared with walking interventions on uterine artery resistance index at rest. Analyses conducted with a random effects model. CI, confidence interval; df, degrees of freedom; IV, inverse variance; SE, standard error.

# Supplemental Figures (Funnel Plots)

## Fetal Heart Rate During Exercise


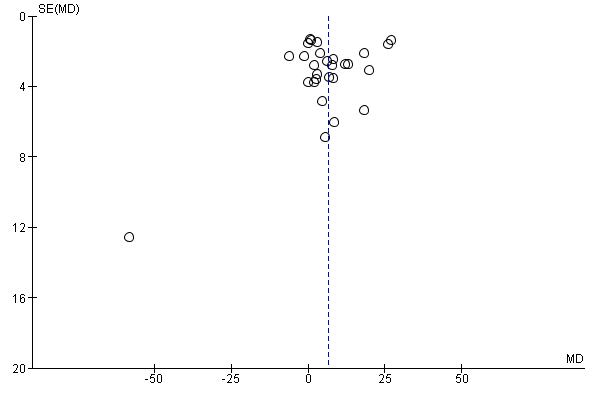


*Online Supplement Figure 78.* Funnel plot of the meta-analysis of published acute prenatal exercise on the fetal heart rate response during exercise. Each plotted point represents the mean difference (pre-during exercise) in FHR for a distinct group within each study. The vertical line represents the average mean difference of 6.35bpm found in the meta-analysis.

## Fetal Heart Rate Following Exercise


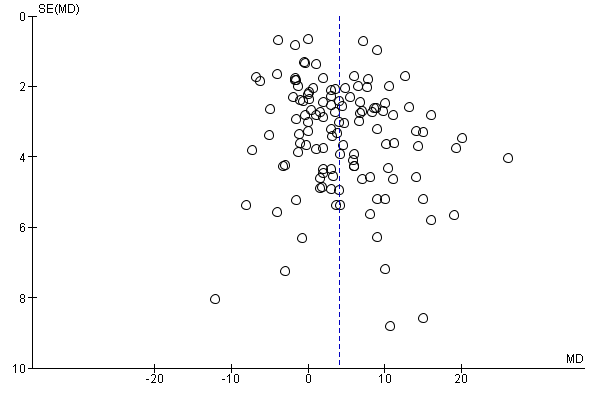


*Online Supplement Figure 79.* Funnel plot of the meta-analysis of published acute prenatal exercise on the fetal heart rate response following exercise. Each plotted point represents the mean difference (pre-following exercise) in FHR for a distinct group within each study. The vertical line represents the average mean difference of 4.05bpm found in the meta-analysis.

# Meta-regressions

## Fetal heart rate (during exercise), Predictor: Volume (MET minutes) per session.


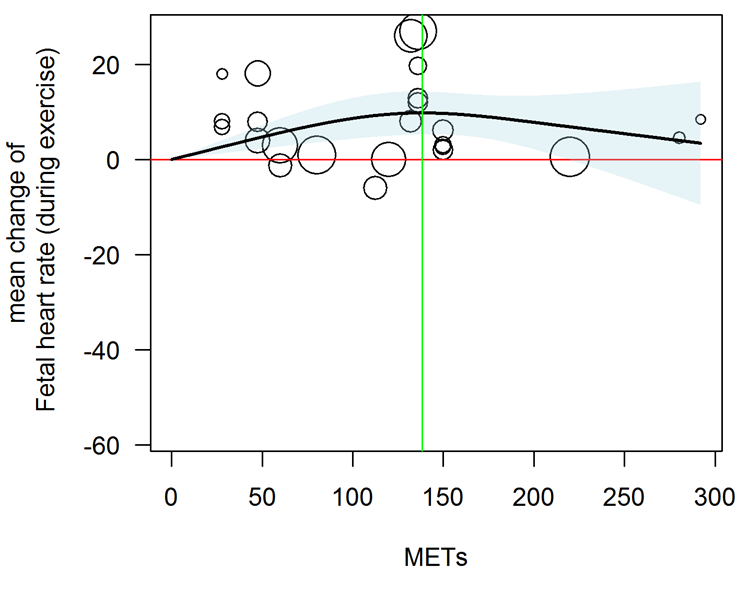


*Online Supplement Figure 80.* Curvilinear (spline) regression of the mean change in fetal heart rate from pre-to-during acute exercise. p <0.001. Black line, line of best fit; red line, mean difference of zero; green line, maximum of non-linear curve; shaded area, 95% confidence intervals. Volume of exercise per session was assessed as MET minutes per session and was determined by multiplying the METs associated with the activity by the duration (minutes) of the activity. Circle size is related to the weight of the study in the regression.

P-values, nonlinear: <0.001. Maximum of nonlinear curve: 9.8 at 138.3 METs

## df AIC BIC AICc logLik LRT pval QE tau^2 R^2
## Full 3 178.1944 181.7286 179.3944 -86.0972 468.3329 69.4584
## Reduced 2 180.2508 182.6069 180.8223 -88.1254 4.0564 0.0440 577.1653 82.9822 16.30%

*Data set*

**Date filename:** ../Data/CONVERSION OF SE TO SD FOR NICK - FHR - meta-regressions May 31, 2018.xlsx
**Sheet:** FHR 1.1 DURING
**Data file last modified**: 01-Jun-2018 at 08:18

The data set has 28 rows and 9 columns.

*Random effects meta-analysis of mean change of fetal heart rate (during exercise)*

##
## Random-Effects Model (k = 28; tau^2 estimator: REML)
##
## tau^2 (estimated amount of total heterogeneity): 88.8918 (SE = 27.2472)
## tau (square root of estimated tau^2 value): 9.4282
## I^2 (total heterogeneity / total variability): 94.20%
## H^2 (total variability / sampling variability): 17.23
##
## Test for Heterogeneity:
## Q(df = 27) = 555.4115, p-val < .0001
##
## Model Results:
##
## estimate se zval pval ci.lb ci.ub
## 6.4520 1.9001 3.3957 0.0007 2.7280 10.1761 ***
##
## ---
## Signif. codes: 0 '***' 0.001 '**' 0.01 '*' 0.05 '.' 0.1 ' ' 1


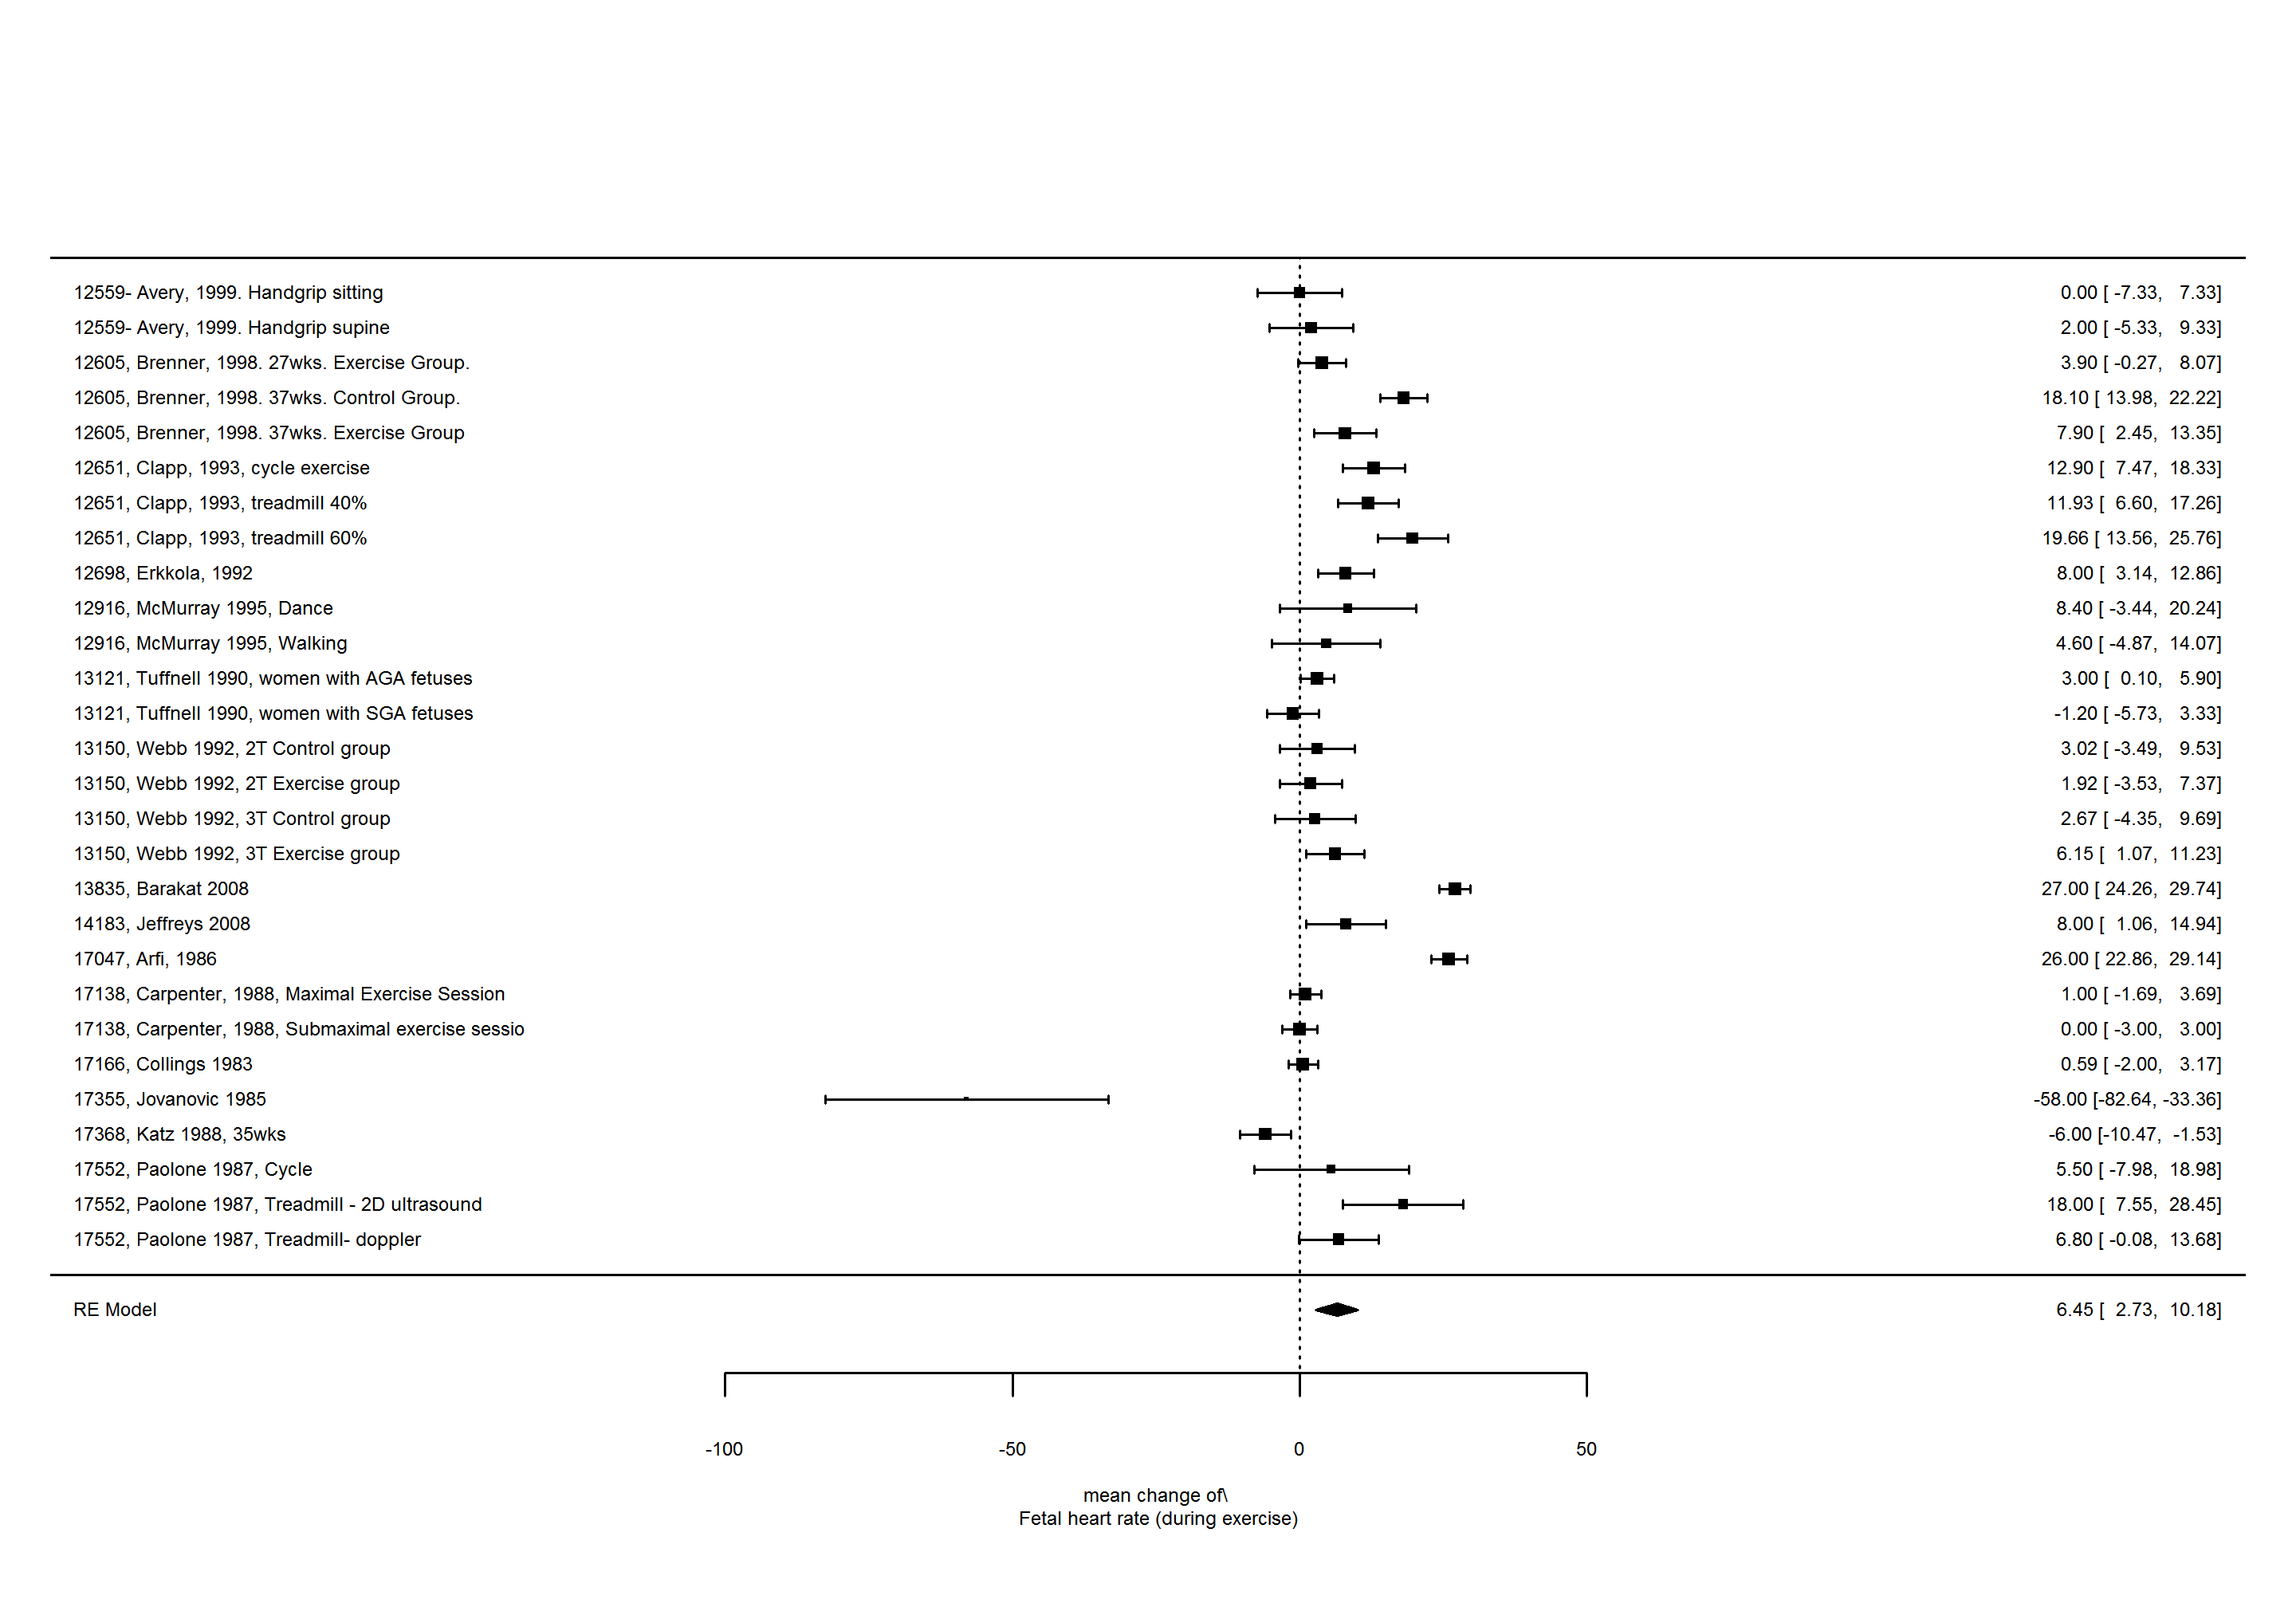


## Fetal heart rate (following exercise), Predictor: Volume (MET minutes) per session.


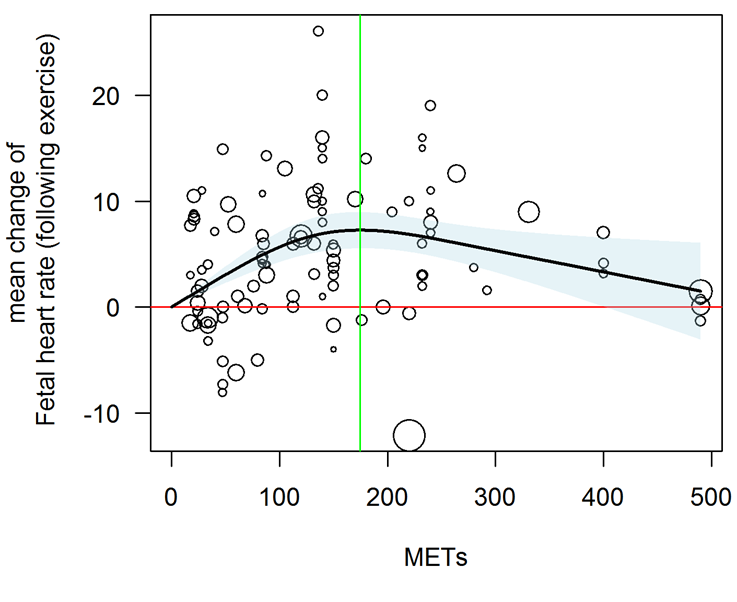


*Online Supplement Figure 81.* Curvilinear (spline) regression of the mean change in fetal heart rate from pre-to-following acute exercise. p <0.001. Black line, line of best fit; red line, mean difference of zero; green line, maximum of non-linear curve; shaded area, 95% confidence intervals. Volume of exercise per session was assessed as MET minutes per session and was determined by multiplying the METs associated with the activity by the duration (minutes) of the activity. Circle size is related to the weight of the study in the regression.

P-values, nonlinear: <0.001. Maximum of nonlinear curve: 7.2 at 174.6 METs

## df AIC BIC AICc logLik LRT pval QE tau^2 R^2
## Full 3 667.5133 675.3883 667.7582 -330.7567 798.0272 26.8195
## Reduced 2 692.1861 697.4361 692.3073 -344.0931 26.6728 <.0001 860.9723 37.1016 27.71%

*Data set*

**Date filename:** ../Data/CONVERSION OF SE TO SD FOR NICK - FHR - meta-regressions May 31, 2018.xlsx
**Sheet:** following
**Data file last modified**: 01-Jun-2018 at 08:18

The data set has 122 rows and 9 columns.

*Random effects meta-analysis of mean change of fetal heart rate (following exercise)*

##
## Random-Effects Model (k = 122; tau^2 estimator: REML)
##
## tau^2 (estimated amount of total heterogeneity): 30.8783 (SE = 5.3762)
## tau (square root of estimated tau^2 value): 5.5568
## I^2 (total heterogeneity / total variability): 86.12%
## H^2 (total variability / sampling variability): 7.20
##
## Test for Heterogeneity:
## Q(df = 121) = 1018.9645, p-val < .0001
##
## Model Results:
##
## estimate se zval pval ci.lb ci.ub
## 4.0616 0.5940 6.8377 <.0001 2.8974 5.2259 ***
##
## ---
## Signif. codes: 0 '***' 0.001 '**' 0.01 '*' 0.05 '.' 0.1 ' ' 1


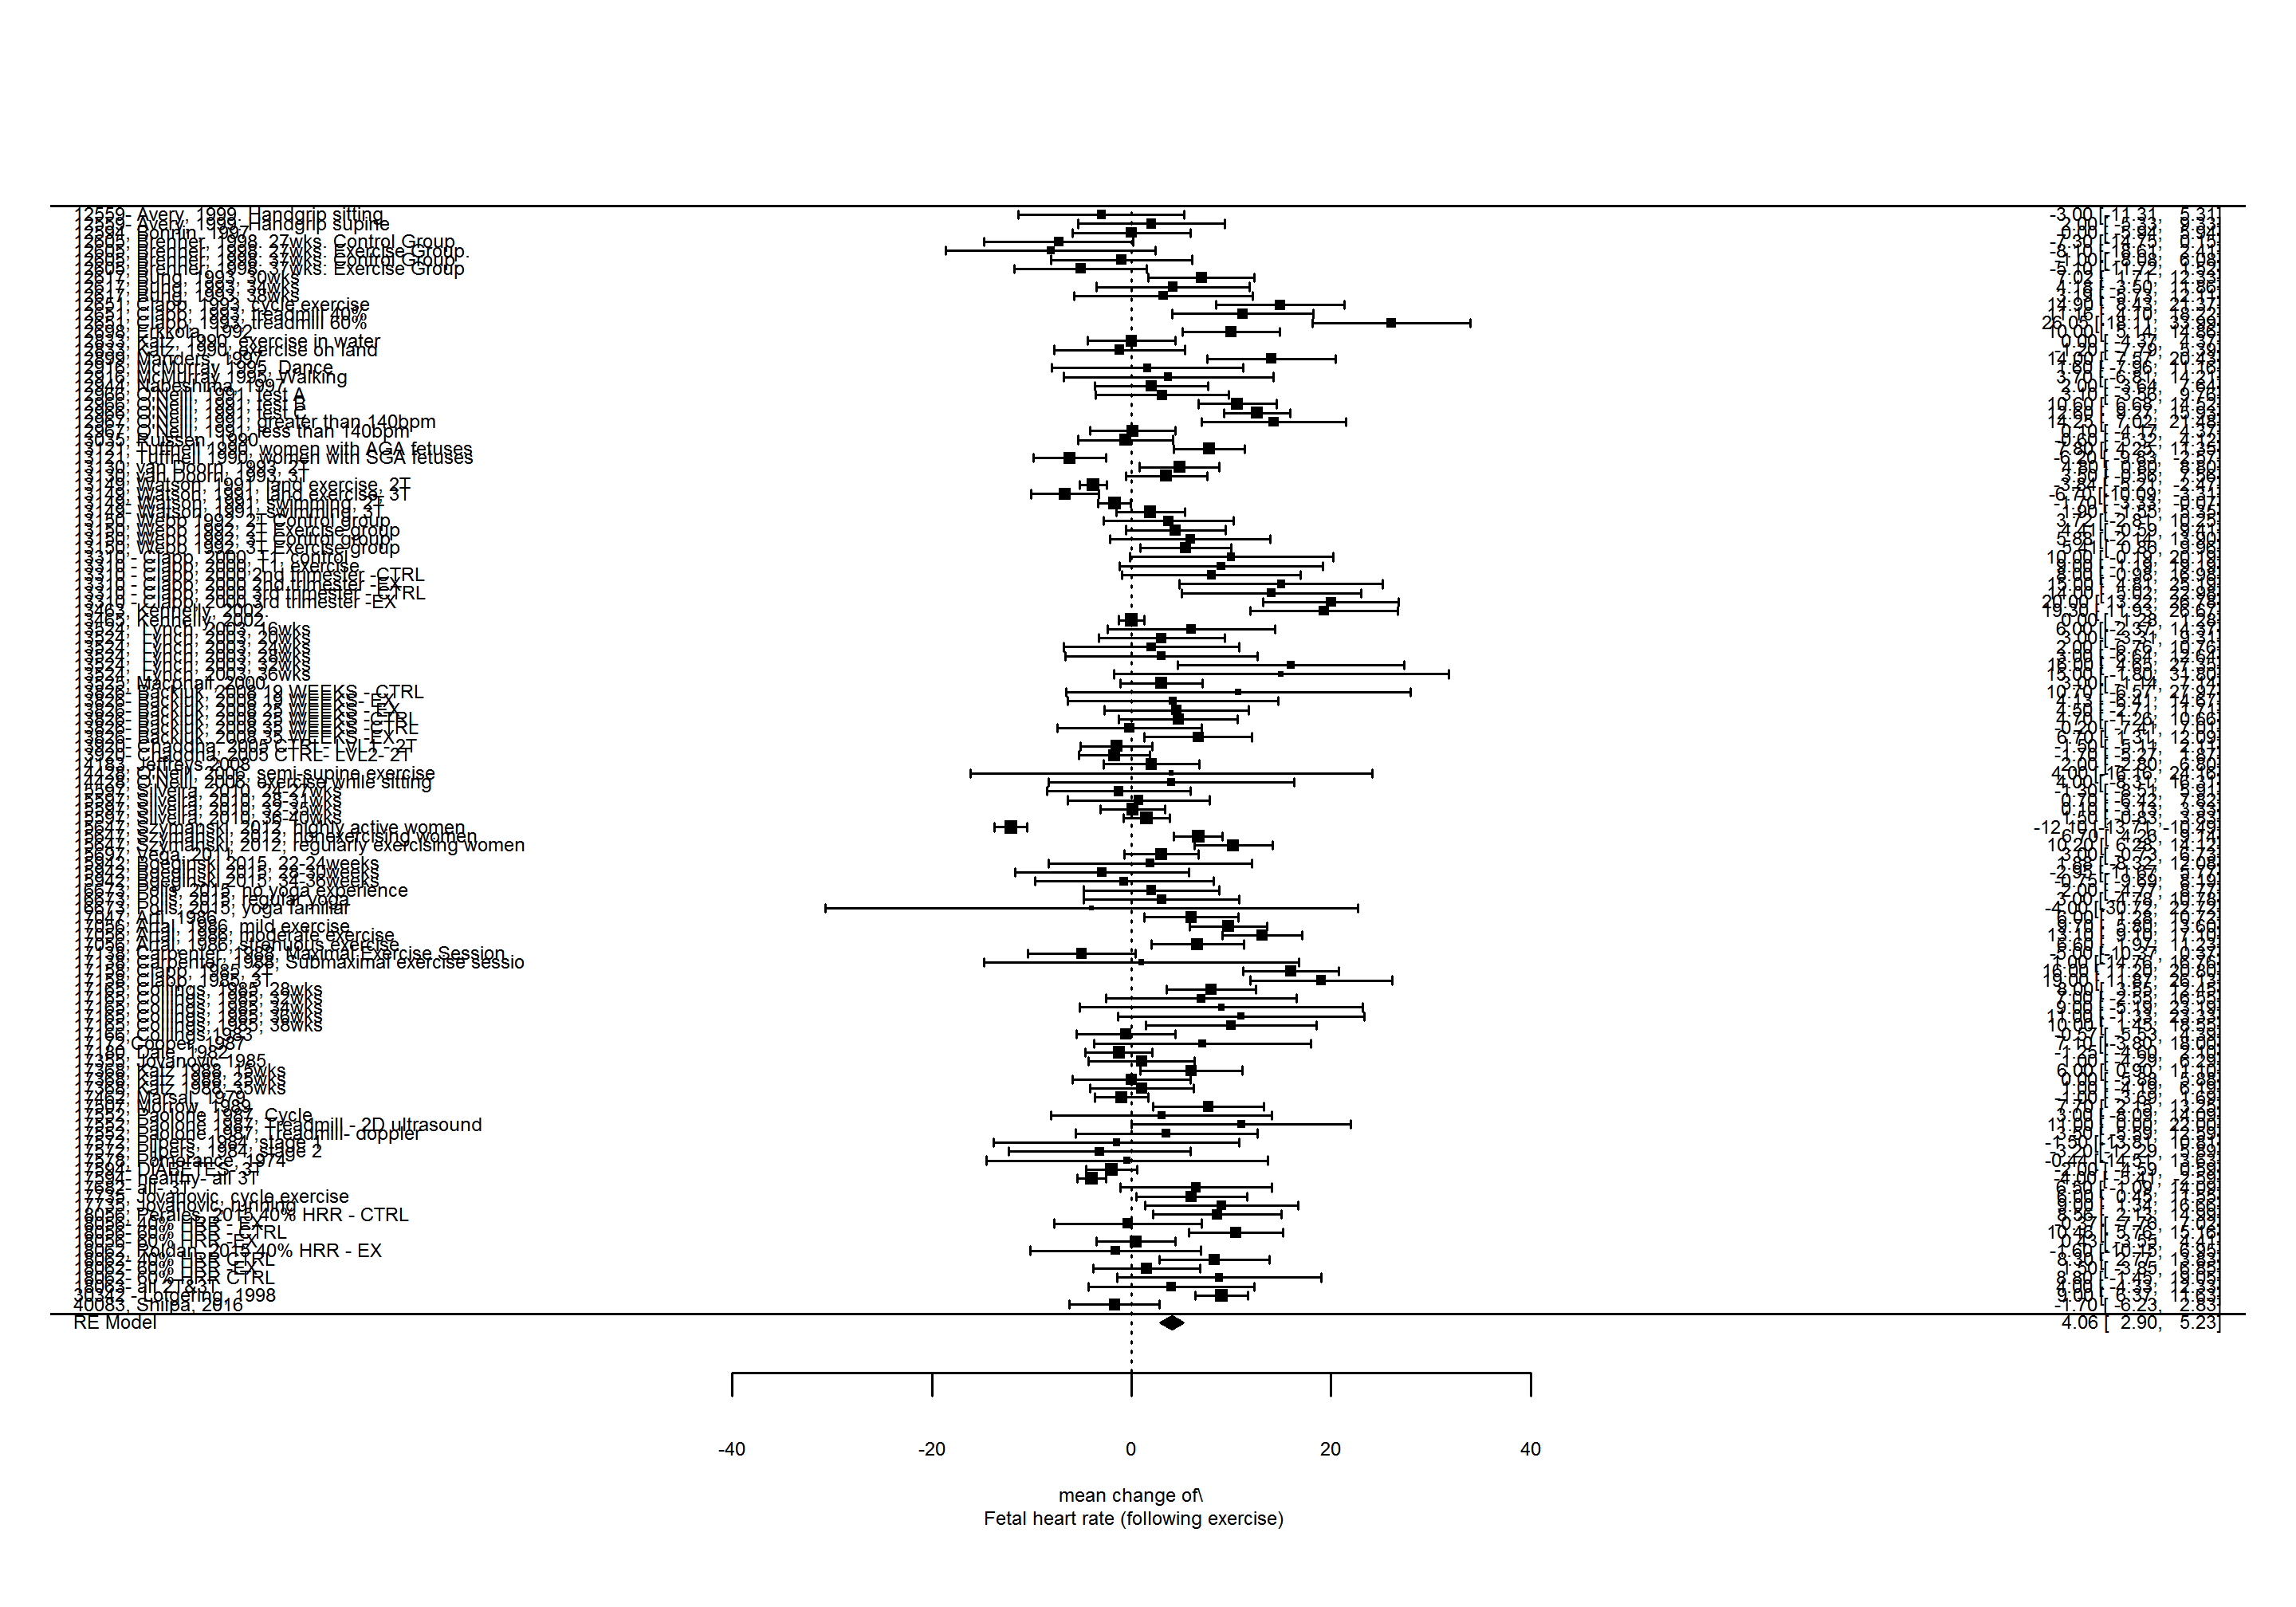


# Proportions/ Incidence

To assess bradycardia and tachycardia in response to acute exercise, the pooled proportion of bradycardia or tachycardia events was obtained through random effects pooling of logit-transformed proportions in R (version 3.4.1) using the rma.glmm function for generalized linear mixed effects models in the metaphor package.92

## Bradycardia occurring during pre-exercise rest


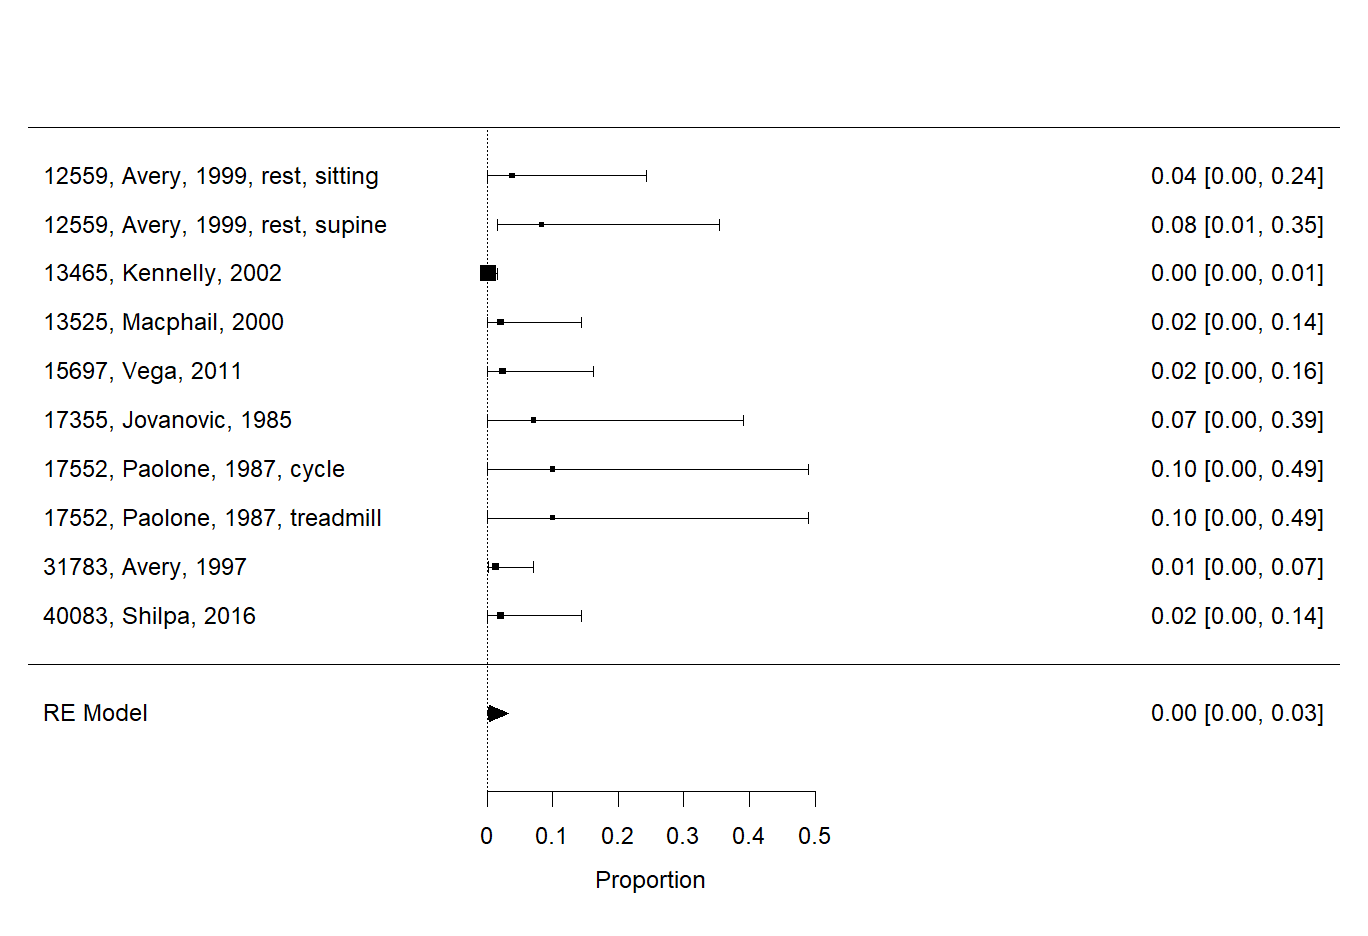


*Online Supplement Figure 82*. Proportion of bradycardia events occurring at rest prior to prenatal exercise. Incidence of bradycardia at rest was used and pooled proportion of bradycardia events was obtained through random effects pooling of logit-transformed proportions. Data from all studies reporting on bradycardia (author defined). I2= 40%.


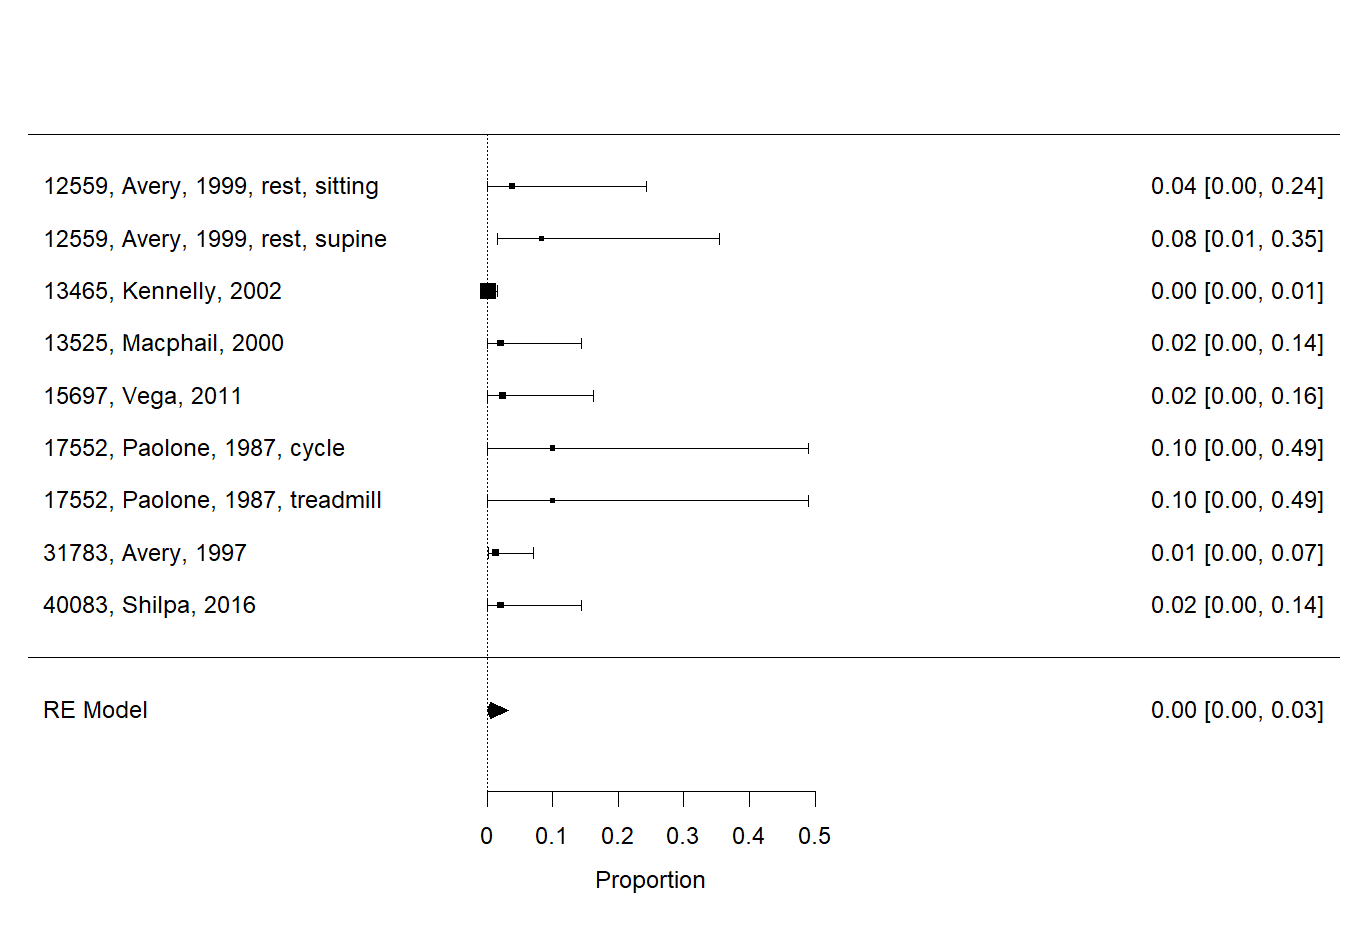


*Online Supplement Figure 83*. Proportion of bradycardia events occurring at rest prior to prenatal exercise. Incidence of bradycardia at rest was used and pooled proportion of bradycardia events was obtained through random effects pooling of logit-transformed proportions. Sensitivity analysis removing study which may have artifact7 I2= 42%

## Bradycardia occurring during acute exercise sessions


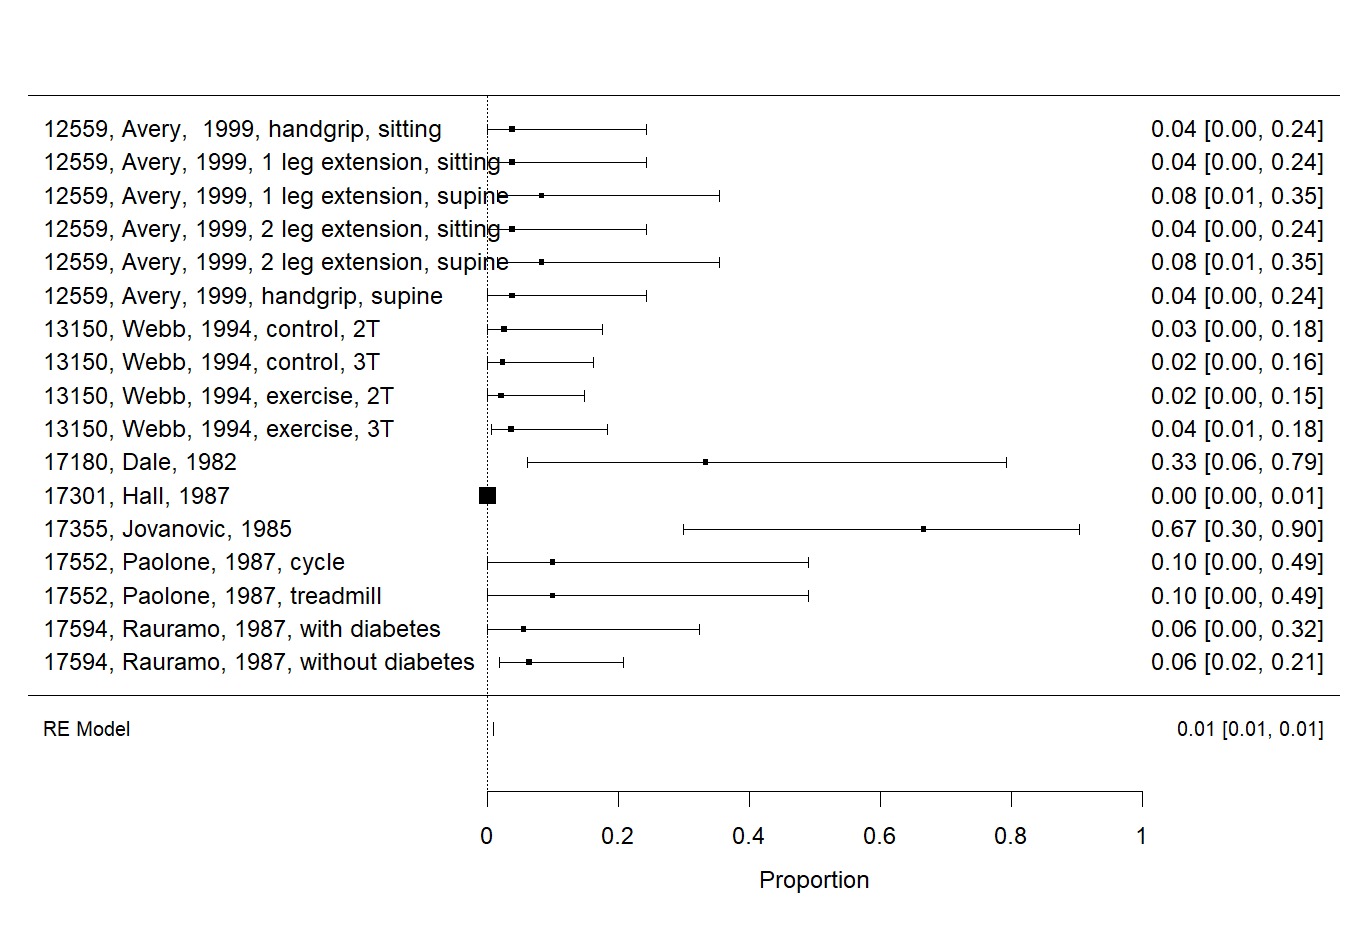


Online Supplement Figure 84. Proportion of bradycardia events occurring during prenatal exercise. Incidence of bradycardia during acute exercise sessions was used and pooled proportion of bradycardia events was obtained through random effects pooling of logit-transformed proportions. Data from all studies reporting on bradycardia (author defined). I2= 80%


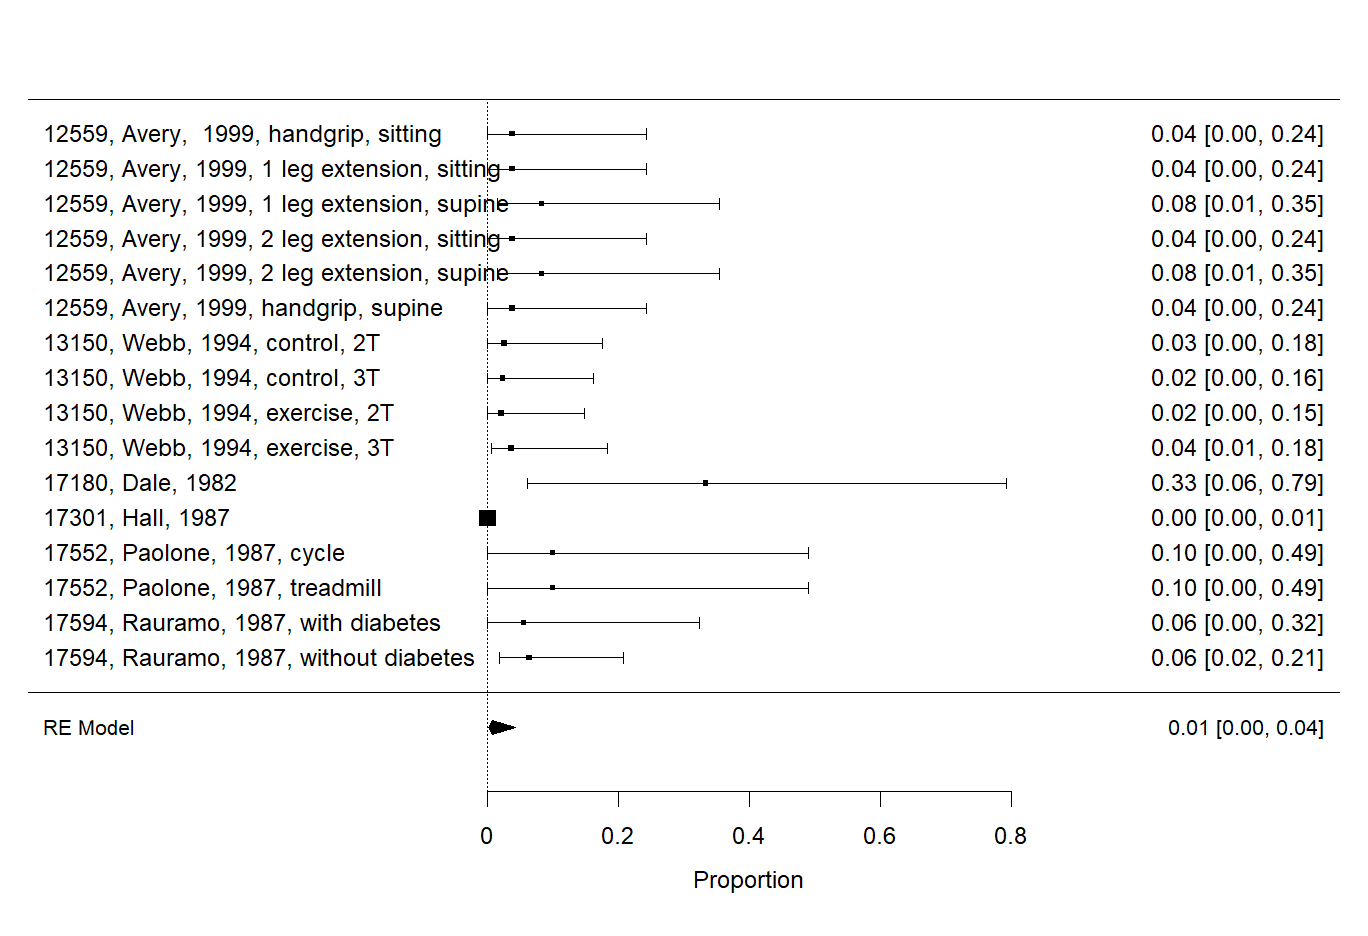


Online Supplement Figure 85. Proportion of bradycardia events occurring during prenatal exercise. Incidence of bradycardia during acute exercise sessions was used and pooled proportion of bradycardia events was obtained through random effects pooling of logit-transformed proportions. Sensitivity analysis removing study which may have artifact. 7 I2= 67%.

## Bradycardia occurring during post-exercise recovery


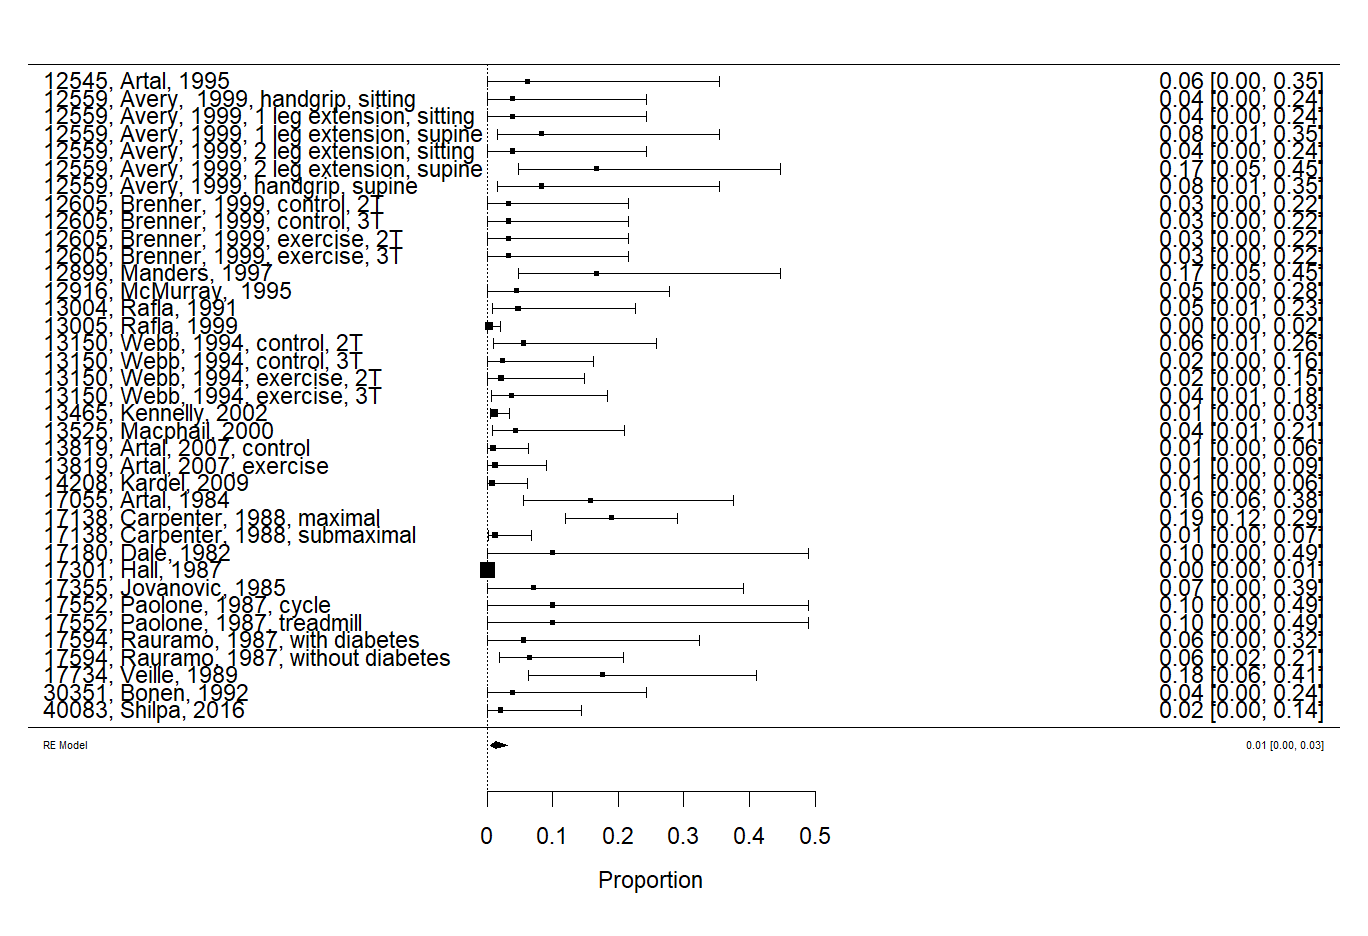


*Online Supplement Figure 86.* Proportion of bradycardia events occurring at rest following acute prenatal exercise. Incidence of bradycardia following exercise was used and pooled proportion of bradycardia events was obtained through random effects pooling of logit-transformed proportions. I2= 76%


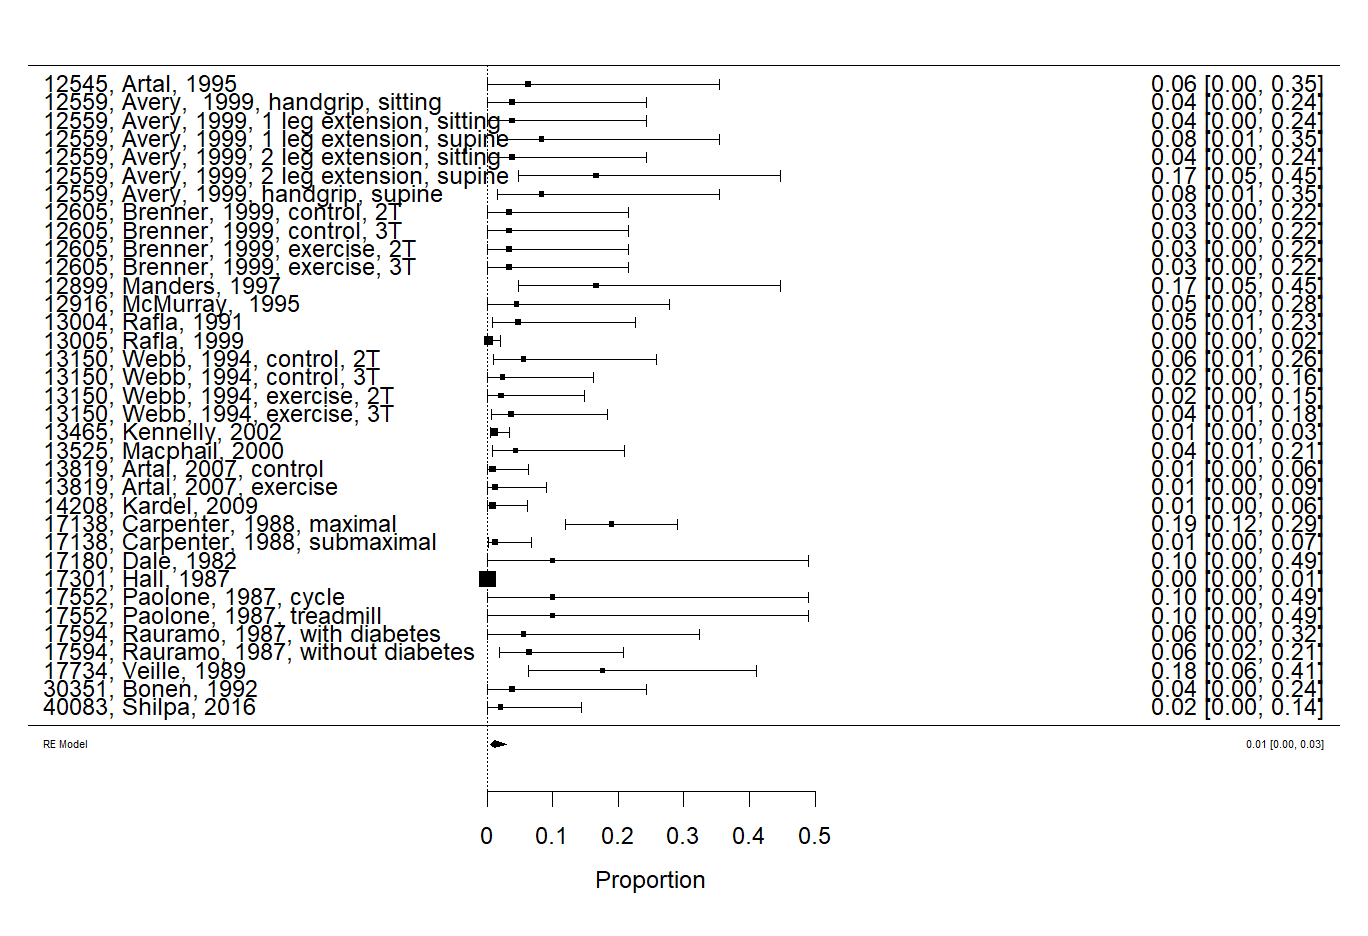


*Online Supplement Figure 87*. Proportion of bradycardia events occurring at rest following acute prenatal exercise. Incidence of bradycardia following exercise was used and pooled proportion of bradycardia events was obtained through random effects pooling of logit-transformed proportions. Sensitivity analysis removing two studies which may have artifact.7 71 I2= 75%

## Tachycardia occurring during pre-exercise rest.


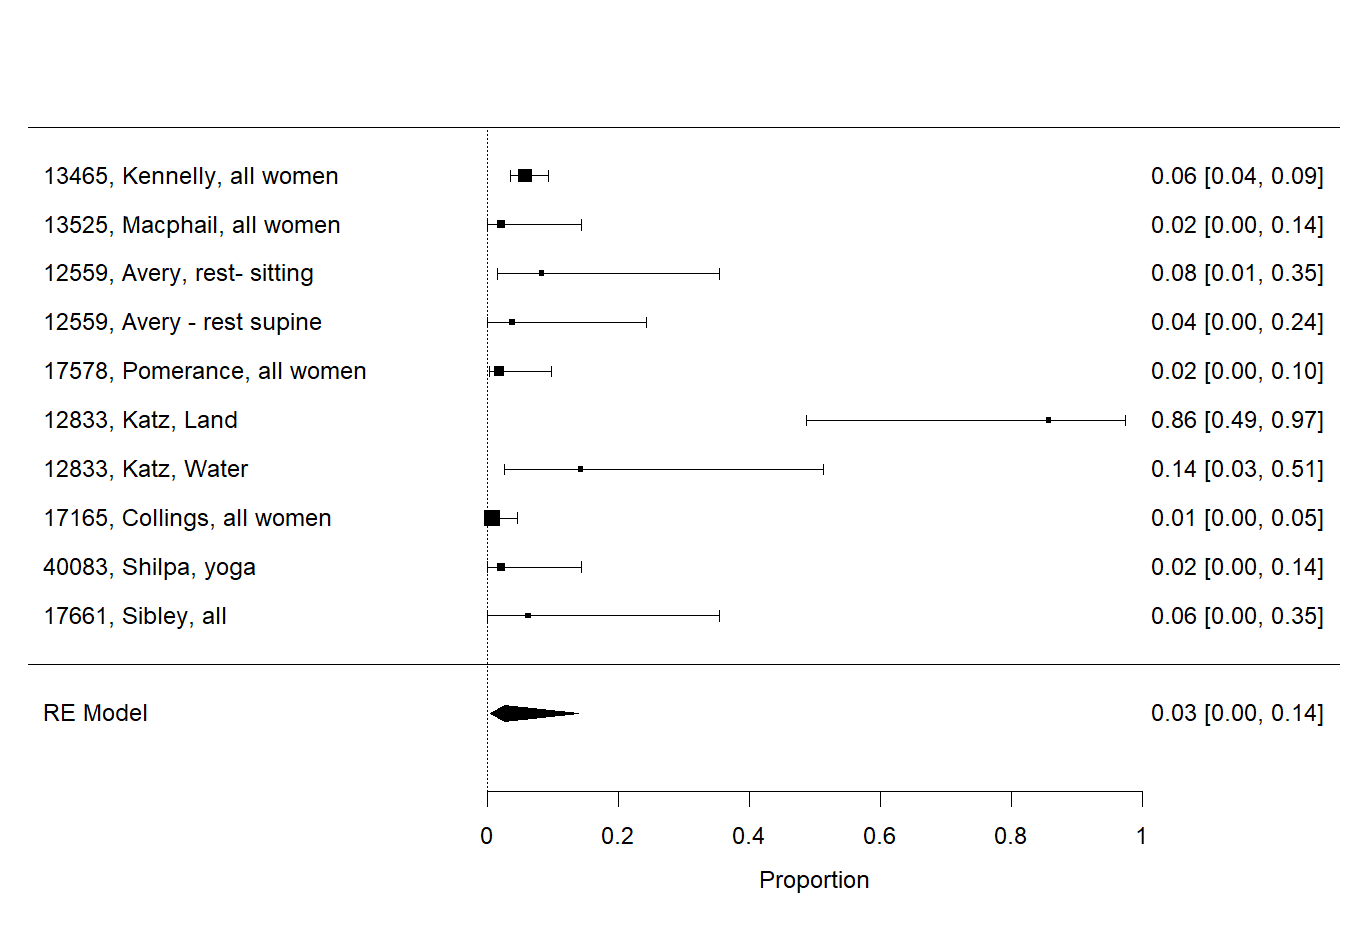


*Online Supplement Figure 88***.** Proportion of tachycardia events occurring at rest prior to prenatal exercise. Incidence of tachycardia at rest was used and pooled proportion of bradycardia events was obtained through random effects pooling of logit-transformed proportions. I2= 86%

## Tachycardia occurring during acute exercise session.
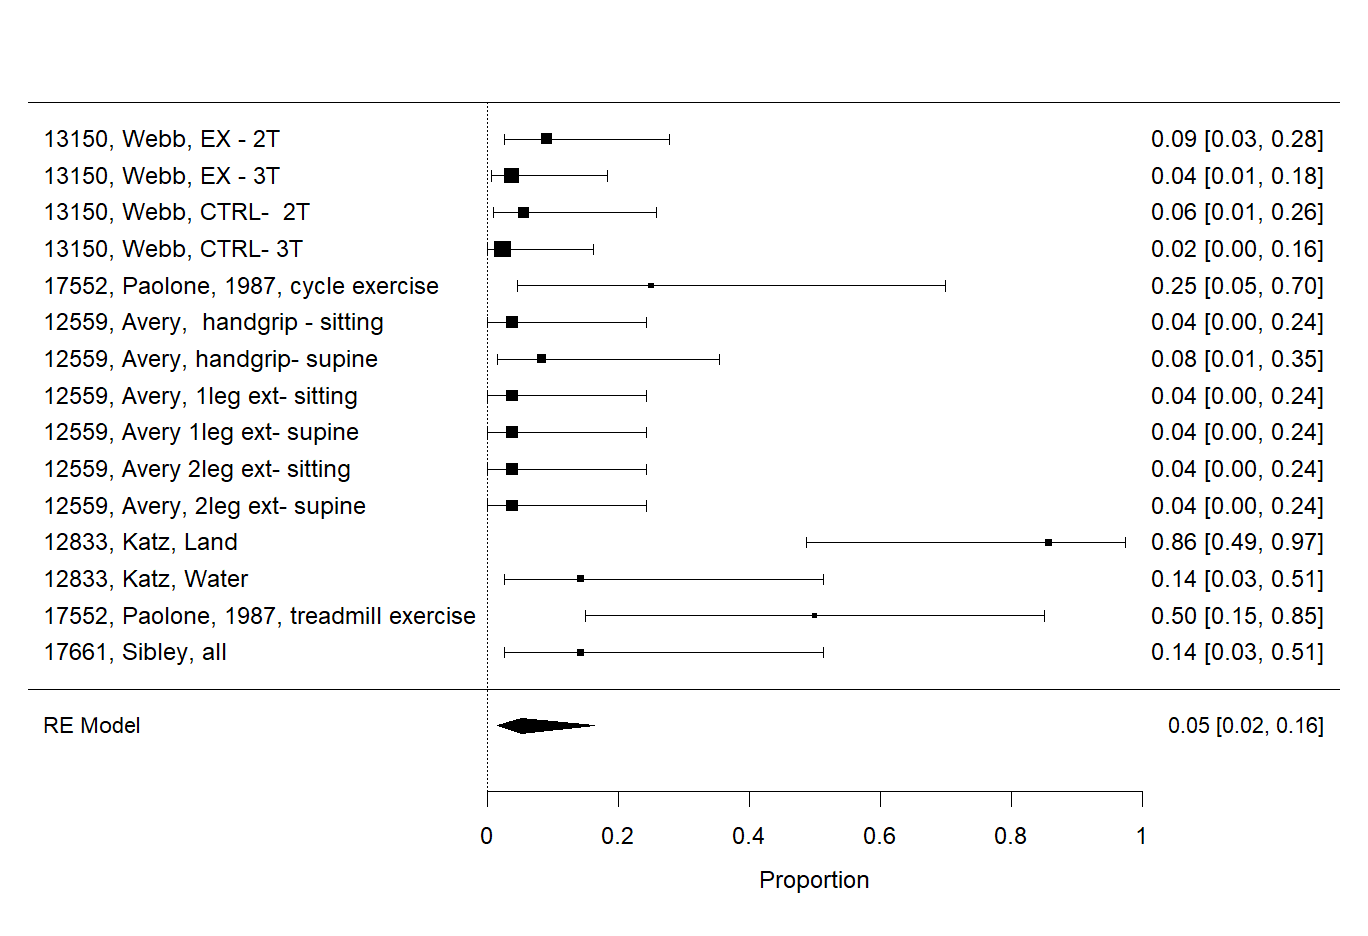


*Online Supplement Figure 89***.** Proportion of tachycardia events occurring during acute prenatal exercise. Incidence of tachycardia during exercise was used and pooled proportion of bradycardia events was obtained through random effects pooling of logit-transformed proportions. I2= 72%

## Tachycardia occurring following an acute exercise session


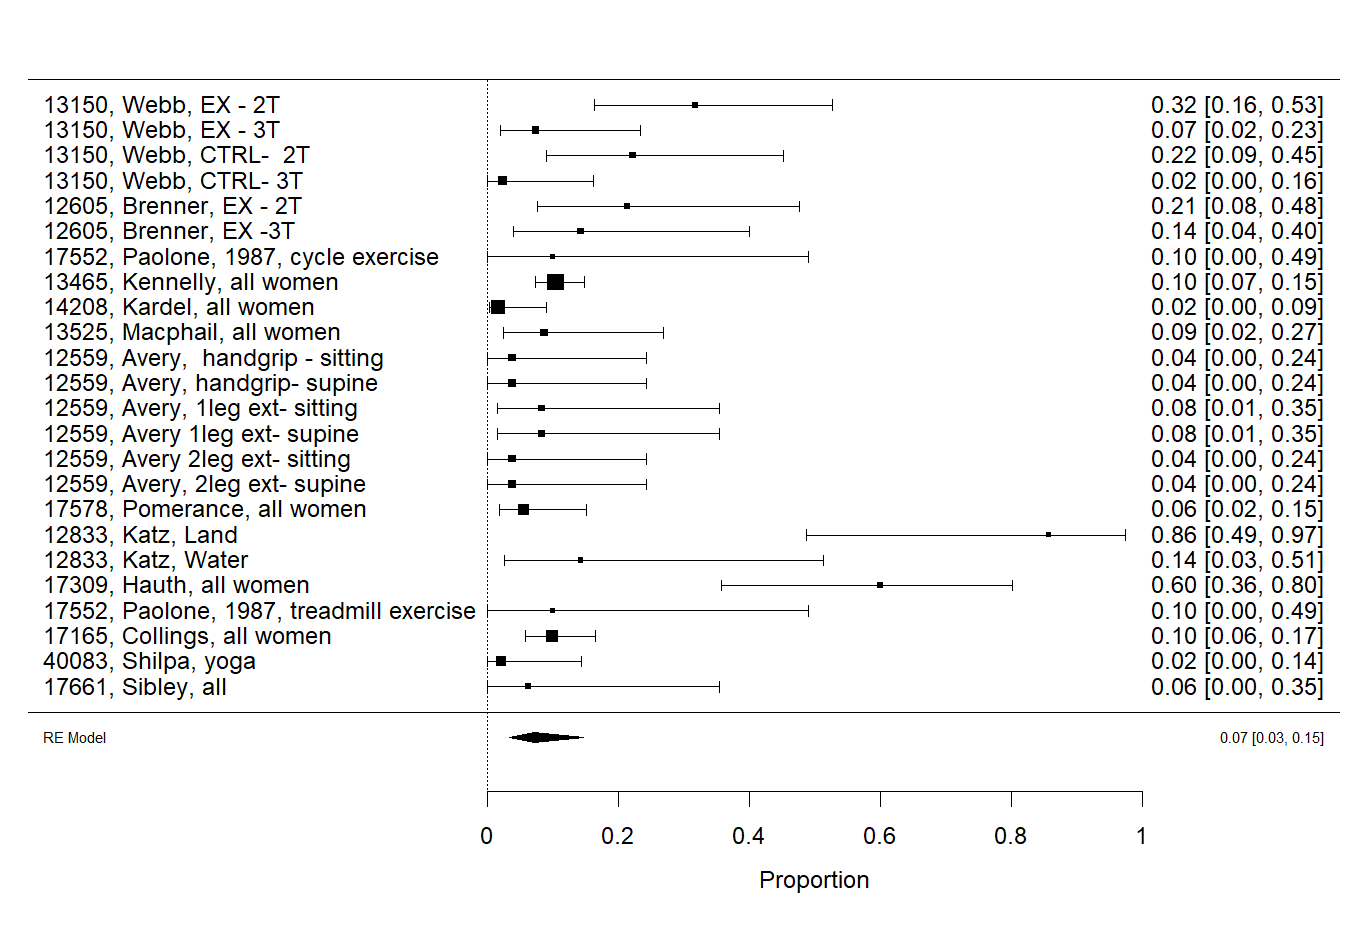


*Online Supplement Figure 90***.** Proportion of tachycardia events occurring at rest following acute prenatal exercise. Incidence of tachycardia following exercise was used and pooled proportion of bradycardia events was obtained through random effects pooling of logit-transformed proportions. I2= 83%

# Search strategies

The following databases were searched on January 6th, 2017:

- Ovid MEDLINE(R) In-Process & Other Non-Indexed Citations, Ovid MEDLINE(R) Daily and Ovid MEDLINE(R)
- Ovid EMBASE
- Ovid All EBM [Evidence-Based Medicine] Reviews: Cochrane Database of Systematic and Cochrane Central Register of Controlled Trials
- Ovid PsycInfo 1806-Present
- EBSCO CINAHL Plus with Full-text, 1937-Present
- EBSCO Sport Discus with Full-text. 1975-Present
- EBSCO ERIC, 1966-Present
- EBSCO Child Development and Adolescent Studies, 1927-Present
- Scopus, 1960-Present
- Web of Science Core Collection (including Emerging Sources Citation Index) , 1900-Present
- Clinicaltrials.gov
- TRIP database

## Maternal Outcomes Strategy

### MEDLINE

1. exp Exercise/ or Athletes/ or exp Exercise Movement Techniques/ or Physical Exertion/ or exp Exercise Therapy/ or exp Sports/ or Motor Activity/ or Sedentary Lifestyle/ or (exercise or physical* activ* or strenuous activit* or physical* inactiv* or sedentary or running or plyometric* or yoga or tai chi or weight training or resistance training or swim* or sport* or athlet* or walk or walking or mvpa or ltpa or stretching or aerobic capacity).ti,kf. or exercise.ab. /freq=2 or physical* activ*.ab. /freq=2 or (weight* adj2 lift*).ti,kf. or ((muscle or muscular or strength*) adj2 conditioning).ti,kf.

2. exp Pregnancy Complications/ or Pregnancy Outcome/ or exp Labor, Obstetric/ or exp Delivery, Obstetric/ or exp Extraction, Obstetrical/ or pregnan*.ti,hw,kf.

3. ((birth or pregnancy or childbirth) adj3 (outcome* or complication*)).mp.

4. (((spontaneous or induc* or onset or length) adj3 (labor or labour)) or c?esarean).mp.

5. (episiotom* or vaginal delivery or gestational diabetes or pre-eclampsia or preeclampsia or gestosis).mp.

6. (((normal or instrumental or assisted) adj2 (delivery or birth or childbirth)) or (forceps or ventouse or vacuum extraction)).mp.

7. ((mode of delivery or type of delivery) and (pregnan* or birth or childbirth or obstetric* or labor or labour)).mp.

8. ((tear* or ruptur* or hemorrhage*) adj2 (placent* or vagin* or membran* or periton*)).mp.

9. (miscarriage* or spontaneous abortion*).mp.

10. or/2-9

11. 1 and 10

12. Pregnancy/ or pregnan*.ti,hw,kf. or exp Pregnancy Trimesters/ or Peripartum Period/ or Postpartum Period/ or (antenatal or prenatal or perinatal or postnatal or prepartum or antepartum or postpartum or pre partum or ante partum or post partum or puerper* or primigravid* or primiparous or multiparous or nulliparous or multigravid* or trimester* or obstetric*).ti,kf.

13. 1 and 12

14. ((pregnan* or antenatal or prenatal or perinatal or postnatal or prepartum or antepartum or postpartum or pre partum or ante partum or post partum or puerper*) adj5 (exercise or physical* activ* or strenuous activit* or physical inactiv* or sedentary or running or plyometric* or yoga or tai chi or weight training or resistance training or (weight* adj2 lift*) or swim* or sport* or athlet* or walk or walking or ((muscle or muscular or strength*) adj2 conditioning))).ab.

15. 13 or 14

16. exp Insulins/ or diabetes mellitus/ or exp diabetes mellitus, type 1/ or exp diabetes mellitus, type 2/ or diabetes, gestational/ or prediabetic state/ or hemoglobin a, glycosylated/ or (insulin or glucose or glyc?emic control or blood sugar or diabet* or prediabet* or hba1c or glycosylated h?emoglobin or hyperglyc?emi* or hypoglyc?emi* or (weight adj3 (gain* or change* or loss or lose or retention)) or bmi or body mass index or body composition or skinfold thickness or ((hip or waist) adj2 ratio) or ((waist or abdominal) adj2 circumference) or overweight or obes* or adipos* or underweight or normal weight or healthy weight or hypertension or hypotension or fainting or syncope or lightheaded* or light headed* or dizziness or blood pressure or tox?emi* or eph complex or proteinuria or edema or hemodynamic* or haemodynamic* or systolic or diastolic or cardiovascular or cardiometabolic or cardio-metabolic or metabolic or heart or cardio* or cardiac or lipid* or placental growth factor* or triglyceride* or ldl or hdl or lipoprotein or cholesterol).mp.

17. dehydration/ or exp Cardiovascular Diseases/ or (dehydrat* or heart disease* or cardiovascular disease*).mp.

18. adaptation, physiological/ or body temperature regulation/

19. Physical Fitness/ or exp Physical Endurance/ or me.fs. or (safe* or harm* or risk* or fitness or aerobic capacity or oxygen consumption or vo2 max or vo2max or vo2 peak or vo2peak or frequency or intensity or duration or dose response or fitt or zone or (type* adj2 exercise)).mp.

20. exp Chronic disease/ or exp Osteoporosis/ or exp Urinary Incontinence/ or (chronic disease* or chronic illness* or osteoporosis or incontinen*).mp.

21. exp Back Pain/ or Pelvic Pain/ or Muscle Cramp/ or (Pain/ and exp Hip Joint/) or ((hip or back or pelvic or pelvis) adj3 (pain or discomfort or ache)).mp. or cramp*.mp.

22. Mental Health/ or exp Mental Disorders/ or Body Image/ or Self Concept/ or (mental health or mental disorder* or mental illness* or mental disease* or depression or depressive or mood or anxiety or well being or wellbeing or wellness or body image or self perception).mp.

23. (postur* or supine or valsalva or diastasis recti or rectus abdominis or inter rectus distance or interrectus distance).mp.

24. Fatigue/ or (fatigue or exhaustion or injur* or trauma).mp.

25. or/16-24

26. 15 and 25

27. 11 or 26

28. limit 27 to medline

29. animals/ not (animals/ and humans/)

30. 28 not 29

31. 27 not 28

32. ((rat or rats or mouse or mice or cow or cows or bovine or sheep or ewe*) not ((rat or rats or mouse or mice or cow or cows or bovine or sheep or ewe*) and (human* or women))).ti,ab,kf.

33. 31 not 32

34. 30 or 33

35. remove duplicates from 34

### EMBASE

1. exp *exercise/ or *athlete/ or exp *kinesiotherapy/ or exp *sport/ or exp *physical activity/ or *sedentary lifestyle/ or (exercise or physical* activ* or physical* inactiv* or sedentary or running or plyometric* or yoga or tai chi or weight training or resistance training or swim* or sport* or athlet* or walk or walking or mvpa or ltpa or stretching or aerobic capacity).ti,kw. or exercise.ab. /freq=2 or physical* activ*.ab. /freq=2 or (weight* adj2 lift*).ti,kw. or ((muscle or muscular or strength*) adj2 conditioning).ti,kw.

2. exp pregnancy complication/ or pregnancy outcome/ or exp labor/ or exp delivery/ or pregnan*.ti,kw.

3. ((birth or pregnancy or childbirth) adj3 (outcome* or complication*)).mp.

4. (((spontaneous or induc* or onset or length) adj3 (labor or labour)) or c?esarean).mp.

5. (episiotom* or vaginal delivery or gestational diabetes or pre-eclampsia or preeclampsia or gestosis).mp.

6. (((normal or instrumental or assisted) adj2 (delivery or birth or childbirth)) or (forceps or ventouse or vacuum extraction)).mp.

7. ((mode of delivery or type of delivery) and (pregnan* or birth or childbirth or obstetric* or labor or labour)).mp.

8. ((tear* or ruptur* or hemorrhage*) adj2 (placent* or vagin* or membran* or periton*)).mp.

9. (miscarriage* or spontaneous abortion*).mp.

10. or/2-9

11. 1 and 10

12. Pregnancy/ or pregnan*.ti,hw,kw. or exp Pregnancy Trimesters/ or Peripartum Period/ or Postpartum Period/ or (antenatal or prenatal or perinatal or postnatal or prepartum or antepartum or postpartum or pre partum or ante partum or post partum or puerper* or primigravid* or primiparous or multiparous or nulliparous or multigravid* or trimester* or obstetric*).ti,kw.

13. 1 and 12

14. ((pregnan* or maternal or antenatal or prenatal or perinatal or postnatal or prepartum or antepartum or postpartum or pre partum or ante partum or post partum or puerper*) adj5 (exercise or physical* activ* or strenuous activit* or physical* inactiv* or sedentary or running or plyometric* or yoga or tai chi or weight training or resistance training or (weight* adj2 lift*) or swim* or sport* or athlet* or walk or walking or mvpa or ltpa or stretching or aerobic capacity or fitness or ((muscle or muscular or strength*) adj2 conditioning))).ab.

15. 13 or 14

16. exp insulin/ or exp diabetes mellitus/ or glycosylated hemoglobin/ or (insulin or glucose or glyc?emic control or blood sugar or diabet* or prediabet* or hba1c or glycosylated h?emoglobin or hyperglyc?emi* or hypoglyc?emi* or (weight adj3 (gain* or change* or loss or lose or retention)) or bmi or body mass index or body composition or skinfold thickness or ((hip or waist) adj2 ratio) or ((waist or abdominal) adj2 circumference) or overweight or obes* or adipos* or underweight or normal weight or healthy weight or hypertension or hypotension or fainting or syncope or lightheaded* or light headed* or dizziness or blood pressure or tox?emi* or eph complex or proteinuria or edema or hemodynamic* or haemodynamic* or systolic or diastolic or cardiovascular or cardiometabolic or cardio-metabolic or metabolic or heart or cardio* or cardiac or lipid* or placental growth factor* or triglyceride* or ldl or hdl or lipoprotein or cholesterol).mp.

17. dehydration/ or exp cardiovascular disease/ or (dehydrat* or heart disease* or cardiovascular disease*).mp.

18. adaptation/ or exp thermoregulation/ or fitness/ or endurance/ or (safe* or harm* or risk* or fitness or aerobic capacity or oxygen consumption or vo2 max or vo2max or vo2 peak or vo2peak or frequency or intensity or duration or dose response or fitt or zone or (type* adj2 exercise)).mp.

19. exp backache/ or exp pelvic pain/ or hip pain/ or muscle cramp/ or heat cramp/ or leg cramp/ or ((hip or back or pelvic or pelvis) adj3 (pain or discomfort or ache)).mp. or cramp*.mp.

20. mental health/ or psychological well being/ or exp mental disease/ or body image/ or self concept/ or (mental health or mental disorder* or mental illness* or mental disease* or depression or depressive or mood or anxiety or well being or wellbeing or wellness or body image or self perception).mp.

21. (postur* or supine or valsalva or diastasis recti or rectus abdominis or inter rectus distance or interrectus distance).mp.

22. fatigue/ or exhaustion/ or (fatigue or exhaustion or injur* or trauma or blood loss).mp.

23. chronic disease/ or exp osteoporosis/ or exp urine incontinence/ or (chronic disease* or chronic illness* or osteoporosis or incontinen*).mp.

24. or/16-23

25. 15 and 24

26. 11 or 25

27. exp animal/ not (exp animal/ and human/)

28. 26 not 27

29. remove duplicates from 28

### PsycInfo

1. physical activity/ or exp exercise/ or activity level/ or athletes/ or exp sports/ or ((exercise or physical* activ* or strenuous activit* or physical* inactiv* or sedentary or running or plyometric* or yoga or tai chi or weight training or resistance training or swim* or sport* or athlet* or walk or walking or mvpa or ltpa or stretching or aerobic capacity).ti,ab,id. or ((weight* adj2 lift*) or ((muscle or muscular or strength*) adj2 conditioning))).ti,ab,id.

2. obstetrical complications/ or pregnancy outcomes/ or spontaneous abortion/ or "labor (childbirth)"/ or birth/

3. (pregnan* or ((birth or pregnancy or childbirth) adj3 (outcome* or complication*))).mp.

4. (((spontaneous or induc* or onset or length) adj3 (labor or labour)) or c?esarean).mp.

5. (episiotom* or vaginal delivery or gestational diabetes or pre-eclampsia or preeclampsia or gestosis).mp.

6. (((normal or instrumental or assisted) adj2 (delivery or birth or childbirth)) or (forceps or ventouse or vacuum extraction)).mp.

7. ((mode of delivery or type of delivery) and (pregnan* or birth or childbirth or obstetric* or labor or labour)).mp.

8. ((tear* or ruptur* or hemorrhage*) adj2 (placent* or vagin* or membran* or periton*)).mp.

9. (miscarriage* or spontaneous abortion*).mp.

10. or/2-9

11. 1 and 10

12. exp pregnancy/ or pregnan*.ti,hw,id. or (antenatal or prenatal or perinatal or postnatal or prepartum or antepartum or postpartum or primigravid* or primiparous or multiparous or nulliparous or multigravid* or trimester* or obstetric*).ti,id.

13. 1 and 12

14. ((pregnan* or antenatal or prenatal or perinatal or postnatal or prepartum or antepartum or postpartum or pre partum or ante partum or post partum or puerper*) adj5 (exercise or physical* activ* or strenuous activit* or physical inactiv* or sedentary or running or plyometric* or yoga or tai chi or weight training or resistance training or (weight* adj2 lift*) or swim* or sport* or athlet* or walk or walking or ((muscle or muscular or strength*) adj2 conditioning))).ab.

15. 13 or 14

16. insulin/ or diabetes/ or diabetes mellitus/ or (insulin or glucose or glyc?emic control or blood sugar or diabet* or prediabet* or hba1c or glycosylated h?emoglobin or hyperglyc?emi* or hypoglyc?emi* or (weight adj3 (gain* or change* or loss or lose or retention)) or bmi or body mass index or body composition or skinfold thickness or ((hip or waist) adj2 ratio) or ((waist or abdominal) adj2 circumference) or overweight or obes* or adipos* or underweight or normal weight or healthy weight or hypertension or hypotension or fainting or syncope or lightheaded* or light headed* or dizziness or blood pressure or tox?emi* or eph complex or proteinuria or edema or hemodynamic* or haemodynamic* or systolic or diastolic or cardiovascular or cardiometabolic or cardio-metabolic or metabolic or heart or cardio* or cardiac or lipid* or placental growth factor* or triglyceride* or ldl or hdl or lipoprotein or cholesterol).mp.

17. dehydration/ or exp Cardiovascular Disorders/ or (dehydrat* or heart disease* or cardiovascular disease*).mp.

18. "thermoregulation (body)"/ or physical fitness/ or physical endurance/ or (safe* or harm* or risk* or fitness or aerobic capacity or oxygen consumption or vo2 max or vo2max or vo2 peak or vo2peak or frequency or intensity or duration or dose response or fitt or zone or (type* adj2 exercise)).mp.

19. back pain/ or ((hip or back or pelvic or pelvis) adj3 (pain or discomfort or ache)).mp. or cramp*.mp.

20. mental health/ or exp Mental Disorders/ or exp body image/ or self concept/ or (mental health or mental disorder* or mental illness* or mental disease* or depression or depressive or mood or anxiety or well being or wellbeing or wellness or body image or self perception).mp.

21. (postur* or supine or valsalva or diastasis recti or rectus abdominis or inter rectus distance or interrectus distance).mp.

22. fatigue/ or (fatigue or exhaustion or injur* or trauma).mp.

23. Physical Fitness/ or exp Physical Endurance/ or (safe* or harm* or risk* or fitness or aerobic capacity or oxygen consumption or vo2 max or vo2max or vo2 peak or vo2peak or frequency or intensity or duration or dose response or fitt or zone or (type* adj2 exercise)).mp.

24. chronic illness/ or osteoporosis/ or urinary incontinence/ or (chronic disease* or chronic illness* or osteoporosis or incontinen*).mp.

25. or/16-24

26. 15 and 25

27. 11 or 26

28. first posting.ps.

29. (27 not first posting).ps.

30. limit 29 to human

31. 27 and 28

32. 30 or 31

### Cochrane Library

#1 [mh Exercise] or [mh "Exercise Movement Techniques"] or [mh "Physical Exertion"] or [mh "Exercise Therapy"] or [mh "Motor Activity"] or [mh "Sedentary Lifestyle"] or (exercise or "physical* activ*" or "strenuous activit* " or " physical* inactiv* " or sedentary or running or plyometric* or yoga or " tai chi" or weight training or resistance training or swim* or sport* or athlet* or walk or walking or mvpa or ltpa or stretching or aerobic capacity or physical* active*):ti,ab,kw (weight* near/2 lift*):ti,ab,kw or ((muscle or muscular or strength*) near/2 conditioning):ti,ab,kw

#2 [mh "Pregnancy Complications"] or [mh "Pregnancy Outcome"] or [mh "Labor, Obstetric"] or [mh "Delivery, Obstetric"] or [mh "Extraction, Obstetrical"] or (pregnan*) .ti,ab,kw

#3 ((birth or pregnancy or childbirth) near/3 (outcome* or complication*)):ti,ab,kw

#4 (((spontaneous or induc* or onset or length) near/3 (labor or labour)) or (cesarean or caesarean)):ti,ab,kw

#5  (episiotom* or vaginal delivery or gestational diabetes or pre-eclampsia or preeclampsia or gestosis):ti,ab,kw

#6  (((normal or instrumental or assisted) near/2 (delivery or birth or childbirth)) or (forceps or ventouse or vacuum extraction)):ti,ab,kw

#7 ((mode of delivery or type of delivery) and (pregnan* or birth or childbirth or obstetric* or labor or labour)):ti,ab,kw

#8 ((tear* or ruptur* or hemorrhage*) near/2 (placent* or vagin* or membran* or periton*)):ti,ab,kw

#9 (miscarriage* or spontaneous abortion*):ti,ab,kw

#10 #2 or #3 or #4 or #5 or #6 or #7 or #8 or #9

#11 #1 AND #10

#12 [mh Pregnancy] or (pregnan*):ti,ab,kw or [mh "Pregnancy Trimesters"] or [mh "Peripartum Period"] or [mh "Postpartum Period"] or (antenatal or prenatal or perinatal or postnatal or prepartum or antepartum or postpartum or pre partum or ante partum or post partum or puerper* or primigravid* or primiparous or multiparous or nulliparous or multigravid* or trimester* or obstetric*):ti,ab,kw

#13 #1 AND #12

#14 ((pregnan* or antenatal or prenatal or perinatal or postnatal or prepartum or antepartum or postpartum or pre partum or ante partum or post partum or puerper*) near/5 (exercise or physical* activ* or strenuous activit* or physical inactiv* or sedentary or running or plyometric* or yoga or tai chi or weight training or resistance training or (weight* near/2 lift*) or swim* or sport* or athlet* or walk or walking or ((muscle or muscular or strength*) near/2 conditioning))) .ab.

#15 #13 or #14

#16  [mh Insulins] or [mh "diabetes mellitus"] or [mh "diabetes, gestational"] or [mh "prediabetic state"] or [mh "hemoglobin a, glycosylated"] or (insulin or glucose or "glycemic control" or "blood sugar" or diabet* or prediabet* or hba1c or "glycosylated hemoglobin" or "glycosylated haemoglobin" or hyperglycemi* or hypoglycemi* or hyperglycaemi* or hypoglycaemi* or (weight near/3 (gain* or change* or loss or lose or retention)) or bmi or (weight near/3 (gain* or change* or loss or lose or retention)) or bmi or "body mass index" or "body composition" or "skinfold thickness" or ((hip or waist) near/2 ratio) or ((waist or abdominal) near/2 circumference) or overweight or obes* or adipos* or underweight or "normal weight" or "healthy weight" or hypertension or hypotension or fainting or syncope or lightheaded* or "light headed*" or dizziness or "blood pressure" or toxemi* or "eph complex" or proteinuria or edema or hemodynamic* or haemodynamic* or systolic or diastolic or cardiovascular or cardiometabolic or "cardio-metabolic" or metabolic or heart or cardio* or cardiac or lipid* or "placental growth factor*" or triglyceride* or ldl or hdl or lipoprotein or cholesterol):ti,ab,kw

#17 [mh dehydration] or [mh "Cardiovascular Diseases"] or (dehydrat* or heart disease* or "cardiovascular disease*"):ti,ab,kw

#18 [mh "adaptation, physiological"] or [mh "body temperature regulation"]

#19 [mh "Physical Fitness"] or [mh "Physical Endurance"] or (safe* or harm* or risk* or fitness or "aerobic capacity" or "oxygen consumption" or "vo2 max" or vo2max or "vo2 peak" or vo2peak or frequency or intensity or duration or "dose response" or fitt or zone or (type* near/2 exercise)):ti,ab,kw

#20 [mh "Chronic disease"] or [mh Osteoporosis] or [mh "Urinary Incontinence"] or ("chronic disease*" or "chronic illness*" or osteoporosis or incontinen*):ti,ab,kw

#21 [mh "Back Pain"] or [mh "Pelvic Pain"] or [mh "Muscle Cramp"] or cramp*:ti,ab,kw or ([mh Pain] and ([mh "Hip Joint"] or ((hip or back or pelvic or pelvis) near/3 (pain or discomfort or ache))):ti,ab,kw)

#22 [mh "Mental Health"] or [mh "Mental Disorders"] or [mh "Body Image"] or [mh "Self Concept"] or ("mental health" or "mental disorder*" or "mental illness*" or "mental disease*" or depression or depressive or mood or anxiety or "well being" or wellbeing or wellness or "body image" or "self perception"):ti,ab,kw

#23 [mh Fatigue] or (fatigue or exhaustion or injur* or trauma):ti,ab,kw

#24 (postur* or supine or valsalva or "diastasis recti" or "rectus abdominis" or "inter rectus distance" or "interrectus distance"):ti,ab,kw

#25 #16 or #17 or #18 or #19 or #20 or #21 or #22 or #23 or #24

#26 #15 and #25

#27  #11 or #26

### CINAHL

S1 ( (MH "Exercise+") OR (MH "Athletes+") OR (MH "Therapeutic Exercise+") OR (MH "Physical Fitness+") OR (MH "Physical Activity") OR (MH "Physical Endurance+") OR (MH "Exertion+") OR (MH "Sports+") OR (MH "Life Style, Sedentary") OR (MH "Yoga+") OR (MH "Tai Chi") ) OR TI ( exercise or "physical* activ*" or "strenuous activit*" or "physical* inactiv*" or sedentary or running or plyometric* or yoga or "tai chi" or "weight training" or "resistance training" or swim* or sport* or athlet* or walk or walking or mvpa or ltpa or stretching or "aerobic capacity" or fitness or weight* n2 lift* or (muscle or muscular or strength*) n2 conditioning )

S2 ((MH "Pregnancy Complications+") OR (MH "Pregnancy Outcomes") OR (MH "Pregnancy Trimesters+") OR (MH "Labor+") OR (MH "Delivery, Obstetric+") OR (MH "Surgery, Obstetrical+")) OR TI pregnan* OR MW pregnan*

S3 (birth or pregnancy or childbirth) n3 (outcome* or complication*) or (spontaneous or induc* or onset or length) n3 (labor or labour) or cesarean or caesarean or episiotom* or "vaginal delivery" or "gestational diabetes" or "pre-eclampsia" or preeclampsia or gestosis OR (normal or instrumental or assisted) n2 (delivery or birth or childbirth) or forceps or ventouse or "vacuum extraction" or miscarriage* or "spontaneous abortion*" OR ( ("mode of delivery" or "type of delivery") and (pregnan* or birth or childbirth or obstetric* or labor or labour) ) OR (tear* or ruptur* or hemorrhage*) n2 (placent* or vagin* or membran* or periton*)

S4 S2 OR S3

S5 S1 AND S4

S6 ( (MH "Pregnancy") OR (MH "Pregnancy Trimesters+") ) OR TI ( pregnan* or trimester* or antenatal or prenatal or perinatal or postnatal or prepartum or antepartum or postpartum or "pre partum" or "ante partum" or "post partum" or puerper* or primigravid* or primiparous or multiparous or nulliparous or multigravid* ) OR MW ( antenatal or prenatal or perinatal or postnatal or prepartum or antepartum or postpartum or primigravid* or primiparous or multiparous or nulliparous or multigravid* or trimester* or obstetric* )

S7 S1 and S6

S8 (pregnan* or trimester* or antenatal or prenatal or perinatal or postnatal or prepartum or antepartum or postpartum or "pre partum" or "ante partum" or "post partum" or puerper*) n5 (exercise or "physical* activ*" or "strenuous activit*" or "physical* inactiv*" or sedentary or running or plyometric* or yoga or "tai chi" or "weight training" or "resistance training" or (weight* n2 lift*) or swim* or sport* or athlet* or walk or walking or (muscle or muscular or strength*) n2 conditioning)

S9 S7 or S8

S10 ((MH "Insulin+") OR (MH "Diabetes Mellitus+") OR (MH "Prediabetic State") OR (MH "Hemoglobin A, Glycosylated") ) OR ( insulin or glucose or "glycemic control" or "glycaemic control" or "blood sugar" or diabet* or prediabet* or hba1c or "glycosylated hemoglobin" or "glycosylated haemoglobin" or hyperglycemi* or hyperglycaemi* or hypoglycemi* or hypoglycaemi* or weight n3 (gain* or change* or loss or lose or retention) or bmi or "body mass index" or "body composition" or "skinfold thickness" or (hip or waist) n2 ratio or (waist or abdominal) n2 circumference or overweight or obes* or adipos* or underweight or "normal weight" or "healthy weight" or hypertension or hypotension or fainting or syncope or lightheaded* or "light headed*" or dizziness or "blood pressure" or toxemi* or toxaemi* or "eph complex" or proteinuria or edema or hemodynamic* or haemodynamic* or systolic or diastolic or cardiovascular or cardiometabolic or "cardio-metabolic" or metabolic or heart or cardio* or cardiac or lipid* or "placental growth factor*" or triglyceride* or ldl or hdl or lipoprotein or cholesterol )

S11 ((MH "Dehydration") OR (MH "Cardiovascular Diseases+") ) OR ( dehydrat* or heart disease* or "cardiovascular disease*" )

S12 ((MH "Adaptation, Physiological") OR (MH "Body Temperature Regulation+") OR (MH "Physical Fitness+") OR (MH "Physical Endurance+") ) OR MW metabolism OR ( safe* or harm* or risk* or fitness or "aerobic capacity" or "oxygen consumption" or "vo2 max" or vo2max or "vo2 peak" or vo2peak or frequency or intensity or duration or "dose response" or fitt or zone or type* n2 exercise )

S13 ((MH "Chronic Disease") OR (MH "Urinary Incontinence+") OR (MH "Osteoporosis+") ) OR ( "chronic disease*" or "chronic illness*" or osteoporosis or incontinen* )

S14 ((MH "Back Pain+") OR (MH "Pelvic Pain+") OR (MH "Muscle Cramp") ) OR ( cramp* or (hip or back or pelvic or pelvis) n3 (pain or discomfort or ache) )

S15 ((MH "Mental Health") OR (MH "Mental Disorders+") OR (MH "Psychological Well-Being") OR (MH "Body Image") OR (MH "Self Concept")) OR ( "mental health" or "mental disorder*" or "mental illness*" or "mental disease*" or depression or depressive or mood or anxiety or "well being" or wellbeing or wellness or "body image" or "self perception" )

S16 (MH "Fatigue") or fatigue or exhaustion or injur* or trauma

S17 postur* or supine or valsalva or "diastasis recti" or "rectus abdominis" or "inter rectus distance" or "interrectus distance"

S18 S10 OR S11 OR S12 OR S13 OR S14 OR S15 OR S16 OR S17

S19 S9 AND S18

S20 S5 OR S19

### Sport Discus

S1 (birth or pregnancy or childbirth) n3 (outcome* or complication*) or (spontaneous or induc* or onset or length) n3 (labor or labour) or cesarean or caesarean or episiotom* or "vaginal delivery" or "gestational diabetes" or "pre-eclampsia" or preeclampsia or gestosis) OR (normal or instrumental or assisted) n2 (delivery or birth or childbirth) or forceps or ventouse or "vacuum extraction" or miscarriage* or "spontaneous abortion*" OR ( ("mode of delivery" or "type of delivery") and (pregnan* or birth or childbirth or obstetric* or labor or labour) ) OR (tear* or ruptur* or hemorrhage*) n2 (placent* or vagin* or membran* or periton*) OR antenatal or prenatal or perinatal or postnatal or prepartum or antepartum or postpartum or "pre partum" or "ante partum" or "post partum" or puerper* or primigravid* or primiparous or multiparous or nulliparous or multigravid* or pregnan* or trimester* or obstetric*

S2 exercise or "physical* activ*" or "strenuous activit*" or "physical* inactiv*" or sedentary or running or plyometric* or yoga or "tai chi" or "weight training" or "resistance training" or swim* or sport* or athlet* or walk or walking or mvpa or ltpa or stretching or "aerobic capacity" or fitness or weight* n2 lift* or (muscle or muscular or strength*) n2 conditioning

S3 S1 and S2

[Limited to Academic Journal, Dissertation, Report]

### Child Development & Adolescent Studies

exercise or "physical* activ*" or "strenuous activit*" or "physical* inactiv*" or sedentary or running or plyometric* or yoga or "tai chi" or "weight training" or "resistance training" or swim* or sport* or athlet* or walk or walking or mvpa or ltpa or stretching or "aerobic capacity" or fitness or weight* n2 lift* or (muscle or muscular or strength*) n2 conditioning

AND

pregnan* or antenatal or prenatal or perinatal or postnatal or prepartum or antepartum or postpartum or primigravid* or primiparous or multiparous or nulliparous or multigravid* or or trimester* or obstetric* or ( (birth or pregnancy or childbirth) n3 (outcome* or complication*) or (spontaneous or induc* or onset or length) n3 (labor or labour) or cesarean or caesarean or episiotom* or "vaginal delivery" or "gestational diabetes" or "pre-eclampsia" or preeclampsia or gestosis OR (normal or instrumental or assisted) n2 (delivery or birth or childbirth) or forceps or ventouse or "vacuum extraction" or miscarriage* or "spontaneous abortion*" OR ( ("mode of delivery" or "type of delivery") and (pregnan* or birth or childbirth or obstetric* or labor or labour) ) OR ( (tear* or ruptur* or hemorrhage*) n2 (placent* or vagin* or membran* or periton*)

[Limitedto Academic Journal]

### ERIC

exercise or "physical* activ*" or "strenuous activit*" or "physical* inactiv*" or sedentary or running or plyometric* or yoga or "tai chi" or "weight training" or "resistance training" or swim* or sport* or athlet* or walk or walking or mvpa or ltpa or stretching or "aerobic capacity" or fitness or weight* n2 lift* or (muscle or muscular or strength*) n2 conditioning

AND

pregnan* or antenatal or prenatal or perinatal or postnatal or prepartum or antepartum or postpartum or primigravid* or primiparous or multiparous or nulliparous or multigravid* or or trimester* or obstetric* or ( (birth or pregnancy or childbirth) n3 (outcome* or complication*) or (spontaneous or induc* or onset or length) n3 (labor or labour) or cesarean or caesarean or episiotom* or "vaginal delivery" or "gestational diabetes" or "pre-eclampsia" or preeclampsia or gestosis OR (normal or instrumental or assisted) n2 (delivery or birth or childbirth) or forceps or ventouse or "vacuum extraction" or miscarriage* or "spontaneous abortion*" OR ( ("mode of delivery" or "type of delivery") and (pregnan* or birth or childbirth or obstetric* or labor or labour) ) OR ( (tear* or ruptur* or hemorrhage*) n2 (placent* or vagin* or membran* or periton*)

[Limited to Academic Journals]

### Scopus

(((TITLE-ABS-KEY(((birth or pregnancy or childbirth) w/3 (outcome* or complication*)) or ((spontaneous or induc* or onset or length) w/3 (labor or labour)) or cesarean or caesarean or episiotom* or "vaginal delivery" or "gestational diabetes" or "pre-eclampsia" or preeclampsia or gestosis OR ( (normal or instrumental or assisted) w/2 (delivery or birth or childbirth) or forceps or ventouse or "vacuum extraction" or miscarriage* or "spontaneous abortion*" ) OR (("mode of delivery" or "type of delivery") and (pregnan* or birth or childbirth or obstetric* or labor or labour) ) OR ( (tear* or ruptur* or hemorrhage*) w/2 (placent* or vagin* or membran* or periton*)) OR antenatal or prenatal or perinatal or postnatal or prepartum or antepartum or postpartum or "pre partum" or "ante partum" or "post partum" or puerper* or primigravid* or primiparous or multiparous or nulliparous or multigravid* or pregnan* or obstetric* or trimester*))) AND (TITLE ( exercise* OR "physical* activ*" OR "strenuous activit*" OR "physical inactiv*" OR sedentary OR running OR plyometric* OR yoga OR "tai chi" OR "weight training" OR "resistance training" OR swim* OR sport* OR athlet* OR walk OR walking OR "muscle strengthening" OR "muscle conditioning" OR "muscular conditioning" OR "weight lifting" OR "lifting weight*" ))) OR ((TITLE-ABS-KEY((insulin or glucose or "glycemic control" or "glycaemic control" or "blood sugar" or diabet* or prediabet* or hba1c or "glycosylated hemoglobin" or "glycosylated haemoglobin" or hyperglycemi* or hyperglycaemi* or hypoglycemi* or hypoglycaemi* or (weight w/3 (gain* or change* or loss or lose or retention)) or bmi or "body mass index" or "body composition" or "skinfold thickness" or ((hip or waist) w/2 ratio) or ((waist or abdominal) w/2 circumference) or overweight or obes* or adipos* or underweight or "normal weight" or "healthy weight" or hypertension or hypotension or fainting or syncope or lightheaded* or "light headed*" or dizziness or "blood pressure" or toxemi* or toxaemi* or "eph complex" or proteinuria or edema or hemodynamic* or haemodynamic* or systolic or diastolic or cardiovascular or cardiometabolic or "cardio-metabolic" or metabolic or heart or cardio* or cardiac or lipid* or "placental growth factor*" or triglyceride* or ldl or hdl or lipoprotein or cholesterol or dehydrat* or heart disease* or "cardiovascular disease*" or safe* or harm* or risk* or fitness or "aerobic capacity" or "oxygen consumption" or "vo2 max" or vo2max or "vo2 peak" or vo2peak or frequency or intensity or duration or "dose response" or fitt or zone or (type* w/2 exercise) or "chronic disease*" or "chronic illness*" or osteoporosis or incontinen* or cramp* or ((hip or back or pelvic or pelvis) w/3 (pain or discomfort or ache)) or "mental health" or "mental disorder*" or "mental illness*" or "mental disease*" or depression or depressive or mood or anxiety or "well being" or wellbeing or wellness or fatigue or exhaustion or injur* or trauma or postur* or supine or valsalva or "diastasis recti" or "rectus abdominis" or "inter rectus distance" or "interrectus distance"))) AND (((TITLE(exercise* or "physical* activ*" or "strenuous activit*" or "physical inactiv*" or sedentary or running or plyometric* or yoga or "tai chi" or "weight training" or "resistance training" or swim* or sport* or athlet* or walk or walking OR "muscle strengthening" or "muscle conditioning" or "muscular conditioning" or "weight lifting" or "lifting weight*") AND TITLE-ABS-KEY(pregnan* or antenatal or prenatal or perinatal or postnatal or prepartum or antepartum or postpartum or "pre partum" or "ante partum" or "post partum" or puerper*)) AND (TITLE-ABS-KEY ( pregnan* OR antenatal OR prenatal OR perinatal OR postnatal OR prepartum OR antepartum OR postpartum OR "pre partum" OR "ante partum" OR "post partum" OR puerper* ))))) AND NOT (TITLE(rat or rats or mouse or mice or cow or cows or bovine or sheep or ewe*))

### Web of Science Core Collection (including Emerging Science Citation Index)

#1 TI=(exercise* or "physical* activ*" or "strenuous activit*" or "physical inactiv*" or sedentary or running or plyometric* or yoga or "tai chi" or "weight training" or "resistance training" or swim* or sport* or athlet* or walk or walking or (muscle* or muscular or strength) near/2 conditioning or weight* near/2 lift*)

#2 TS=(pregnan* or antenatal or prenatal or perinatal or postnatal or prepartum or antepartum or postpartum or "pre partum" or "ante partum" or "post partum" or puerper* or primigravid* or primiparous or multiparous or nulliparous or multigravid* or trimester* or obstetric*)

#3 #1 AND #2

#4 TS=(insulin or glucose or "glycemic control" or "glycaemic control" or "blood sugar" or diabet* or prediabet* or hba1c or "glycosylated hemoglobin" or "glycosylated haemoglobin" or hyperglycemi* or hyperglycaemi* or hypoglycemi* or hypoglycaemi* or (weight near/3 (gain* or change* or loss or lose or retention)) or bmi or "body mass index" or "body composition" or "skinfold thickness" or ((hip or waist) near/2 ratio) or ((waist or abdominal) near2 circumference) or overweight or obes* or adipos* or underweight or "normal weight" or "healthy weight" or hypertension or hypotension or fainting or syncope or lightheaded* or "light headed*" or dizziness or "blood pressure" or toxemi* or toxaemi* or "eph complex" or proteinuria or edema or hemodynamic* or haemodynamic* or systolic or diastolic or cardiovascular or cardiometabolic or "cardio-metabolic" or metabolic or heart or cardio* or cardiac or lipid* or "placental growth factor*" or triglyceride* or ldl or hdl or lipoprotein or cholesterol or dehydrat* or heart disease* or "cardiovascular disease*" or safe* or harm* or risk* or fitness or "aerobic capacity" or "oxygen consumption" or "vo2 max" or vo2max or "vo2 peak" or vo2peak or frequency or intensity or duration or "dose response" or fitt or zone or (type* near2 exercise) or "chronic disease*" or "chronic illness*" or osteoporosis or incontinen* or cramp* or ((hip or back or pelvic or pelvis) near/3 (pain or discomfort or ache)) or "mental health" or "mental disorder*" or "mental illness*" or "mental disease*" or depression or depressive or mood or anxiety or "well being" or wellbeing or wellness or fatigue or exhaustion or injur* or traumaor postur* or supine or valsalva or "diastasis recti" or "rectus abdominis" or "inter rectus distance" or "interrectus distance")

#5 #3 AND #4

#6 TS=((birth or pregnancy or childbirth) near/3 (outcome* or complication*) or (spontaneous or induc* or onset or length) near/3 (labor or labour) or cesarean or caesarean or episiotom* or "vaginal delivery" or "gestational diabetes" or "pre-eclampsia" or preeclampsia or gestosis OR (normal or instrumental or assisted) near/2 (delivery or birth or childbirth) or forceps or ventouse or "vacuum extraction" or miscarriage* or "spontaneous abortion*" OR ("mode of delivery" or "type of delivery") and (pregnan* or birth or childbirth or obstetric* or labor or labour) OR (tear* or ruptur* or hemorrhage*) near/2 (placent* or vagin* or membran* or periton*))

#7 #1 AND #6

#8 #5 OR #7

#9 TS=(rat or rats or mouse or mice or cow or cows or bovine or sheep or ewe*)

#10 #9 NOT #8

### Clinicatrials.gov

(exercise OR "physical activity" ) AND (antenatal OR prenatal OR perinatal OR postnatal OR prepartum OR antepartum OR postpartum OR "pre partum" OR fetus OR foetus OR fetal OR foetal)

(exercise OR "physical activity" ) AND ("ante partum" OR "post partum" OR puerper* OR primigravida OR primiparous OR multiparous OR nulliparous OR multigravida OR trimester OR trimesters OR obstetric)

### Trip Database

title(exercise OR "physical activity" ) AND title(pregnan* or antenatal OR prenatal OR perinatal OR postnatal OR prepartum OR antepartum OR postpartum OR "pre partum" OR fetus OR foetus OR fetal OR foetal)

## Fetal Outcomes Strategies

### MEDLINE

1. exp Exercise/ or Athletes/ or exp Exercise Movement Techniques/ or exp Exercise Therapy/ or exp Sports/ or Motor Activity/ or Physical Exertion/ or Sedentary Lifestyle/ or (exercise or physical* activ* or physical* inactiv* or sedentary or running or plyometric* or yoga or tai chi or weight training or resistance training or swim* or sport* or athlet* or walk or walking or mvpa or ltpa or stretching or aerobic capacity or fitness).ti,kf. or exercise.ab. /freq=2 or (weight* adj2 lift*).ti,kf. or ((muscle or muscular or strength*) adj2 conditioning).ti,kf.

2. Pregnancy/ or exp Pregnancy Complications/ or Pregnancy Outcome/ or exp Pregnancy Trimesters/ or Peripartum Period/ or Postpartum Period/ or pregnan*.hw. or (pregnan* or antenatal or prenatal or perinatal or postnatal or prepartum or antepartum or postpartum or pre partum or ante partum or post partum or puerper* or primigravid* or primiparous or multiparous or nulliparous or multigravid* or trimester* or obstetric*).ti,kf.

3. 1 and 2

4. ((pregnan* or maternal or antenatal or prenatal or perinatal or postnatal or prepartum or antepartum or postpartum or puerper* or pre partum or ante partum or post partum) adj5 (exercise or physical* activ* or strenuous activit* or physical* inactiv* or sedentary or running or plyometric* or yoga or tai chi or weight training or resistance training or (weight* adj2 lift*) or swim* or sport* or athlet* or walk or walking or mvpa or ltpa or stretching or aerobic capacity or fitness or ((muscle or muscular or strength*) adj2 conditioning))).ab.

5. 3 or 4

6. exp birth weight/ or fetal weight/

7. infant, low birth weight/ or infant, small for gestational age/ or exp infant, very low birth weight/ or infant, postmature/ or exp infant, premature/

8. ((preterm or pre matur* or prematur* or post matur* or postmatur*) adj2 birth).mp.

9. Fetal Growth Retardation/ or fetal hypoxia/ or fetal macrosomia/

10. exp Fetal Development/ or exp Congenital Abnormalities/ or exp Fetus/ or (f?etus or f?etal).ti,hw,kf.

11. maternal fetal exchange/ or (exp Uterus/ and exp Regional Blood Flow/) or (placenta* or uteroplacenta* or ((maternal f?etal or f?etomaternal or transplacental) adj2 (transfusion or exchange))).mp.

12. ((f?etal or f?etus) adj2 (response or matur*)).mp.

13. ((f?etal or f?etus or neonat* or newborn or infant) adj3 (growth or develop* or viability or viable or weight or wellbeing or well being or health or heart rate or heartrate or bradycardia or hypoxi* or hypoglyc?emi* or movement or oxygenation)).mp.

14. (((uterine or uterus) adj2 (blood flow or circulat*)) or ((uterine or umbilical or mid* cerebral) adj2 doppler)).mp.

15. (intrauterine growth or iugr).mp.

16. ((perinatal or f?etal or f?etus or neonat* or newborn* or infant*) adj3 (mortality or morbidity or death or outcome* or complication*)).mp.

17. (still birth or stillbirth).mp.

18. (birth weight or birthweight or macrosomia or gestational age or lga or sga or preterm or (prematur* adj2 (infant* or neonat* or newborn* or birth or labo?r))).mp.

19. ((neonatal or newborn* or infant* or f?etus or f?etal) and (fat* or abdominal circumference or body composition or bmi or body mass index or waist circumference or skeletal size or height or anthropometric* or apgar or adipos* or ph or base excess or metabolic or acidosis or insulin or diabet* or hyperbilirubin?emi*)).mp.

20. (f?etus or f?etal).mp. and (adaptation, physiological/ or me.fs.)

21. (((birth or delivery) adj3 (trauma or injur* or defect*)) or (dystocia or nicu or neonatal intensive care or brachial plexus)).mp.

22. exp Birth Injuries/

23. ((neonat* or infant* or newborn*) and (ponderal index or skinfold or bmi or body mass index)).mp.

24. Cerebral Palsy/ or exp Neural Tube Defects/ or Cleft Palate/ or (cerebral palsy or neural tube defect* or spina bifida or anencephal* or encephalocele* or iniencephal* or spinal dyraphism or diastematomyel* or lipomingocele* or lipmyelomeningocele* or meningomyelocele* or cleft palate* or cleft lip*).mp.

25. (((development* or learning or intellectual* or cognitive* or language or communication or speech or motor) adj2 (disorder* or disab* or delay*)) or behavio?r disorder* or attention deficit or autis* or asperger* or child development or developmental milestone* or neurodevelopment* or cognitive development or motor development or motor skill* or psychosocial development or chronic disease* or chronic illness* or cardiovascular or cardiometabolic or diabet* or heart disease*).mp. or exp Heart Disease/ or exp Mental Disorders Diagnosed in Childhood/

26. Pediatric Obesity/ or ((child* or p?ediatric) adj2 (obes* or overweight)).mp.

27. or/6-25

28. 5 and 27

29. (animals/ not (animals/ and humans/)) or ((rat or rats or mouse or mice or cow or cows or bovine or sheep or ewe*) not ((rat or rats or mouse or mice or cow or cows or bovine or cattle or sheep or ewe*) and (human* or women))).ti,ab,kf. or (rat or rats or mouse or mice or cow or cows or bovine or cattle or sheep or ewe*).ti.

30. 28 not 29

### EMBASE

1. exp *exercise/ or *athlete/ or exp *kinesiotherapy/ or exp *sport/ or exp *physical activity/ or *sedentary lifestyle/ or (exercise or physical* activ* or physical* inactiv* or sedentary or running or plyometric* or yoga or tai chi or weight training or resistance training or swim* or sport* or athlet* or walk or walking or mvpa or ltpa or stretching or aerobic capacity or fitness or sport*).ti,kw. or exercise.ab. /freq=2 or (weight* adj2 lift*).ti,kw. or ((muscle or muscular or strength*) adj2 conditioning).ti,kw.

2. exp pregnancy/ or exp pregnancy complications/ or pregnancy outcome/ or perinatal period/ or puerperium/ or pregnan*.hw. or (pregnan* or antenatal or prenatal or perinatal or postnatal or prepartum or antepartum or postpartum or pre partum or ante partum or post partum or puerper* or primigravid* or primiparous or multiparous or nulliparous or multigravid* or trimester* or obstetric*).ti,kw.

3. 1 and 2

4. ((pregnan* or maternal or antenatal or prenatal or perinatal or postnatal or prepartum or antepartum or postpartum or pre partum or ante partum or post partum or puerper*) adj5 (exercise or physical* activ* or strenuous activit* or physical* inactiv* or sedentary or running or plyometric* or yoga or tai chi or weight training or resistance training or (weight* adj2 lift*) or swim* or sport* or athlet* or walk or walking or mvpa or ltpa or stretching or aerobic capacity or fitness or ((muscle or muscular or strength*) adj2 conditioning))).ab.

5. 3 or 4

6. fetus/ or exp birth weight/ or fetus weight/ or "parameters concerning the fetus, newborn and pregnancy"/ or apgar score/ or fetus heart rate/ or exp fetus maturity/ or fetus mortality/ or fetus outcome/ or fetus risk/ or gestational age/ or live birth/ or exp perinatal morbidity/ or exp perinatal mortality/ or prenatal mortality/ or exp intrauterine growth retardation/ or exp "immature and premature labor"/ or exp fetus growth/ or exp prenatal growth/ or fetus hypoxia/ or macrosomia/ or exp fetus development/ or exp congenital disorder/ or exp fetus disease/ or fetomaternal transfusion/ or exp stillbirth/ or spontaneous abortion/ or birth injury/ or cerebral palsy/ or exp neural tube defect/ or child development/ or postnatal development/ or exp mental development/ or childhood obesity/ or exp body composition/ or anthropometric parameters/ or abdominal circumference/ or hip circumference/ or sagittal abdominal diameter/ or waist circumference/ or waist hip ratio/ or waist to height ratio/ or weight height ratio/

7. placenta insufficiency/

8. 6 or 7

9. (f?etus or f?etal).ti,hw,kw. or ((f?etal or f?etus) adj2 (response or matur*)).mp.

10. (placenta* or uteroplacenta* or ((maternal f?etal or transplacental or f?etomaternal) adj2 (exchange or transfusion))).mp.

11. ((f?etal or f?etus or neonat* or newborn or infant) adj3 (growth or develop* or viability or viable or weight or wellbeing or well being or health or heart rate or heartrate or bradycardia or hypoxi* or hypoglyc?emi* or movement or oxygenation)).mp.

12. (((uterine or uterus) adj2 (blood flow or circulat*)) or ((uterine or umbilical or mid* cerebral) adj2 doppler)).mp.

13. (intrauterine growth or iugr).mp.

14. ((perinatal or f?etal or f?etus or neonat* or newborn* or infant*) adj3 (mortality or death or outcome* or complication*)).mp.

15. (still birth or stillbirth).mp.

16. (birth weight or birthweight or macrosomia or gestational age or lga or sga or preterm or (prematur* adj2 (infant* or neonat* or newborn* or birth or labo?r))).mp.

17. ((neonatal or newborn* or infant* or f?etus or f?etal) and (fat* or abdominal circumference or body composition or bmi or body mass index or waist circumference or skeletal size or height or anthropometric* or apgar or adipos* or ph or base excess or metabolic or acidosis or insulin or diabet* or hyperbilirubin?emi*)).mp.

18. (((birth or delivery) adj3 (trauma or injur* or defect*)) or (dystocia or nicu or neonatal intensive care or brachial plexus)).mp.

19. ((neonat* or infant* or newborn*) and (ponderal index or skinfold or bmi or body mass index)).mp.

20. (cerebral palsy or neural tube defect* or spina bifida or anencephal* or encephalocele* or iniencephal* or spinal dyraphism or diastematomyel* or lipomingocele* or lipmyelomeningocele* or meningomyelocele* or cleft palate* or cleft lip*).mp.

21. (((development* or learning or intellectual* or cognitive* or language or communication or speech or motor) adj2 (disorder* or disab* or delay* or impair*)) or behavio?r disorder* or attention deficit or autis* or asperger* or child development or developmental milestone* or neurodevelopment* or cognitive development or motor development or motor skill* or psychosocial development or chronic disease* or chronic illness* or cardiovascular or cardiometabolic or diabet* or heart disease*).mp. or childhood disease/ or exp infant disease/ or exp "disorders of higher cerebral function"/ or exp heart disease/

22. ((child* or p?ediatric) adj2 (obes* or overweight)).mp.

23. or/9-22

24. 8 or 23

25. 5 and 24

26. exp animal/ not (exp animal/ and human/)

27. 25 not 26

### PsycInfo

1. physical activity/ or exp exercise/ or activity level/ or athletes/ or exp sports/ or ((exercise or physical* activ* or strenuous activit* or physical* inactiv* or sedentary or running or plyometric* or yoga or tai chi or weight training or resistance training or swim* or sport* or athlet* or walk or walking or mvpa or ltpa or stretching or aerobic capacity).ti,ab,id. or ((weight* adj2 lift*) or ((muscle or muscular or strength*) adj2 conditioning))).ti,ab,id.

2. exp pregnancy/ or obstetrical complications/ or pregnancy outcomes/ or pregnan*.ti,hw,id. or (antenatal or prenatal or perinatal or postnatal or prepartum or antepartum or postpartum or primigravid* or primiparous or multiparous or nulliparous or multigravid* or trimester* or obstetric*).ti,ab,id.

3. 1 and 2

4. prenatal development/ or birth weight/ or prenatal exposure/ or premature birth/ or fetus/ or amniotic fluid/ or (blood flow/ and uterus/)

5. (f?etus or f?etal or ((preterm or pre matur* or prematur* or post matur* or postmatur*) adj2 birth)).mp.

6. (placenta* or uteroplacenta* or ((maternal f?etal or f?etomaternal or transplacental) adj2 (transfusion or exchange))).mp.

7. ((neonat* or newborn or infant) adj3 (growth or develop* or viability or viable or weight or wellbeing or well being or health or heart rate or heartrate or bradycardia or hypoxi* or hypoglyc?emi* or movement or oxygenation)).mp.

8. (((uterine or uterus) adj2 (blood flow or circulat*)) or ((uterine or umbilical or mid* cerebral) adj2 doppler)).mp.

9. (intrauterine growth or iugr).mp.

10. ((perinatal or f?etal or f?etus or neonat* or newborn* or infant*) adj3 (mortality or morbidity or death or outcome* or complication*)).mp.

11. (still birth or stillbirth).mp.

12. (birth weight or birthweight or macrosomia or gestational age or lga or sga or preterm or (prematur* adj2 (infant* or neonat* or newborn* or birth or labo?r))).mp.

13. ((neonatal or newborn* or infant* or f?etus or f?etal) and (fat* or abdominal circumference or body composition or bmi or body mass index or waist circumference or skeletal size or height or anthropometric* or apgar or adipos* or ph or base excess or metabolic or acidosis or insulin or diabet* or hyperbilirubin?emi*)).mp.

14. (((birth or delivery) adj3 (trauma or injur* or defect*)) or (dystocia or nicu or neonatal intensive care or brachial plexus)).mp.

15. birth injuries/ or birth trauma/

16. ((neonat* or infant* or newborn*) and (ponderal index or skinfold or bmi or body mass index)).mp.

17. exp congenital disorders/ or cerebral palsy/ or cleft palata/ or (cerebral palsy or neural tube defect* or spina bifida or anencephal* or encephalocele* or iniencephal* or spinal dyraphism or diastematomyel* or lipomingocele* or lipmyelomeningocele* or meningomyelocele* or cleft palate* or cleft lip*).mp.

18. exp developmental disabilities/ or exp communication disorders/ or exp delayed development/ or exp intellectual development disorder/ or exp learning disorders/ or exp nervous system disorders/ or exp pervasive developmental disorders/

19. (((development* or learning or intellectual* or cognitive* or language or communication or speech or motor) adj2 (disorder* or disab* or delay*)) or behavio?r disorder* or attention deficit or autis* or asperger* or child development or developmental milestone* or neurodevelopment* or cognitive development or motor development or motor skill* or psychosocial development or chronic disease* or chronic illness* or cardiovascular or cardiometabolic or diabet* or heart disease*).mp. or health disorders/

20. ((child* or p?ediatric) adj2 (obes* or overweight)).mp.

21. or/4-20

22. 3 and 21

23. first posting.ps.

24. 22 not 23

25. limit 24 to human

26. 22 not 24

27. 25 or 26

### Cochrane Library

#1 [mh Exercise] or [mh "Exercise Movement Techniques"] or [mh "Physical Exertion"] or [mh "Exercise Therapy"] or [mh "Motor Activity"] or [mh "Sedentary Lifestyle"] or (exercise or "physical* activ*" or "strenuous activit* " or " physical* inactiv* " or sedentary or running or plyometric* or yoga or " tai chi" or weight training or resistance training or swim* or sport* or athlet* or walk or walking or mvpa or ltpa or stretching or aerobic capacity or physical* active*):ti,ab,kw (weight* near/2 lift*):ti,ab,kw or ((muscle or muscular or strength*) near/2 conditioning):ti,ab,kw

#2  [mh Pregnancy] or [mh "Pregnancy Complications"] or [mh "Pregnancy Outcome"] or [mh "Pregnancy Trimesters"] or [mh "Peripartum Period"] or [mh "Postpartum Period"] or (pregnan* or antenatal or prenatal or perinatal or postnatal or prepartum or antepartum or postpartum or "pre partum" or "ante partum" or "post partum" or puerper* or primigravid* or primiparous or multiparous or nulliparous or multigravid* or trimester* or obstetric*):ti,kw

#3   #1 AND #2

#4   ((pregnan* or maternal or antenatal or prenatal or perinatal or postnatal or prepartum or antepartum or postpartum or puerper* or "pre partum" or "ante partum" or "post partum") near/5 (exercise or "physical* activ*" or "strenuous activit*" or "physical* inactiv*" or sedentary or running or plyometric* or yoga or "tai chi" or "weight training" or "resistance training" or (weight* near/2 lift*) or swim* or sport* or athlet* or walk or walking or mvpa or ltpa or stretching or "aerobic capacity" or fitness or ((muscle or muscular or strength*) near/2 conditioning))):ab

#5  #3 or #4

#6  [mh "birth weight"] or [mh "fetal weight"]

#7  [mh "infant, low birth weight"] or [mh "infant, small for gestational age"] or [mh "infant, very low birth weight"] or [mh "infant, postmature"] or [mh "infant, premature"]

#8  ((preterm or pre matur* or prematur* or post matur* or postmatur*) near/2 birth):ti,ab,kw

#9  [mh "Fetal Growth Retardation"] or [mh "fetal hypoxia"] or [mh "fetal macrosomia"]

#10  [mh "Fetal Development"] or [mh "Congenital Abnormalities"] or [mh "Fetus"] or (fetus or fetal):ti,kw

#11  [mh "maternal fetal exchange"] or ([mh "Uterus"] and [mh "Regional Blood Flow"]) or (placenta* or uteroplacenta* or (("maternal feta"l or fetomaternal or transplacental) near/2 (transfusion or exchange))):ti,ab,kw

#12  ((fetal or fetus) near/2 (response or matur*)):ti,ab,kw

#13  ((fetal or fetus or neonat* or newborn or infant) near/3 (growth or develop* or viability or viable or weight or wellbeing or "well being" or health or "heart rate" or heartrate or bradycardia or hypoxi* or hypoglycemi* or movement or oxygenation)):ti,ab,kw

#14  (((uterine or uterus) near/2 (blood flow or circulat*)) or ((uterine or umbilical or mid* cerebral) near/2 doppler)):ti,ab,kw

#15  (intrauterine growth or iugr):ti,ab,kw

#16  ((perinatal or fetal or fetus or neonat* or newborn* or infant*) near/3 (mortality or morbidity or death or outcome* or complication*)):ti,ab,kw

#17  ("still birth" or stillbirth):ti,ab,kw

#18  ("birth weight" or birthweight or macrosomia or "gestational age" or lga or sga or preterm or (prematur* near/2 (infant* or neonat* or newborn* or birth or labor))):ti,ab,kw

#19  ((neonatal or newborn* or infant* or fetus or fetal) and (fat* or "abdominal circumference" or "body composition" or bmi or "body mass index" or "waist circumference" or "skeletal size" or height or anthropometric* or apgar or adipos* or ph or "base excess" or metabolic or acidosis or insulin or diabet* or hyperbilirubinemi*)):ti,ab,kw

#20  (fetus or fetal):ti,ab,kw and [mh "adaptation, physiological"]

#21  (((birth or delivery) near/3 (trauma or injur* or defect*)) or (dystocia or nicu or "neonatal intensive care" or "brachial plexus")):ti,ab,kw

#22  [mh "Birth Injuries"]

#23  ((neonat* or infant* or newborn*) and ("ponderal index" or skinfold or bmi or "body mass index")):ti,ab,kw

#24  [mh "Cerebral Palsy"] or [mh "Neural Tube Defects"] or [mh "Cleft Palate"] or ("cerebral palsy" or "neural tube defect*" or "spina bifida" or anencephal* or encephalocele* or iniencephal* or spinal dyraphism or diastematomyel* or lipomingocele* or lipmyelomeningocele* or meningomyelocele* or "cleft palate*" or "cleft lip*"):ti,ab,kw

#25  (((development* or learning or intellectual* or cognitive* or language or communication or speech or motor) near/2 (disorder* or disab* or delay*)) or "behavior disorder*" or "attention deficit" or autis* or asperger* or "child development" or "developmental milestone*" or neurodevelopment* or "cognitive development" or "motor development" or "motor skill*" or "psychosocial development" or "chronic disease*" or "chronic illness*" or cardiovascular or cardiometabolic or diabet* or "heart disease*"):ti,ab,kw or [mh "Heart Disease"] or [mh "Mental Disorders Diagnosed in Childhood"]

#26  [mh "Pediatric Obesity"] or ((child* or pediatric) near/2 (obes* or overweight)):ti,ab,kw

#27  #6 or #7 or #8 or #9 or #10 or #11 or #12 or #13 or #14 or #15 or #16 or #17 or #18 or #19 or #20 or #21 or #22 or #23 or #24 or #25 or #26

#28  #5 AND #27

### CINAHL

S1 ( (MH "Exercise+") OR (MH "Athletes+") OR (MH "Therapeutic Exercise+") OR (MH "Physical Fitness+") OR (MH "Physical Activity") OR (MH "Physical Endurance+") OR (MH "Exertion+") OR (MH "Sports+") OR (MH "Life Style, Sedentary") OR (MH "Yoga+") OR (MH "Tai Chi") ) OR TI ( exercise or "physical* activ*" or "strenuous activit*" or "physical* inactiv*" or sedentary or running or plyometric* or yoga or "tai chi" or "weight training" or "resistance training" or swim* or sport* or athlet* or walk or walking or mvpa or ltpa or stretching or "aerobic capacity" or fitness or weight* n2 lift* or (muscle or muscular or strength*) n2 conditioning )

S2 ( (MH "Pregnancy") OR (MH "Pregnancy Complications+") OR (MH "Pregnancy Outcomes") OR (MH "Pregnancy Trimesters+") OR (MH "Postnatal Period") OR (MH "Puerperium") ) OR MW pregnan* OR TI ( pregnan* or antenatal or prenatal or perinatal or postnatal or prepartum or antepartum or postpartum or pre partum or ante partum or post partum or puerper* or primigravid* or primiparous or multiparous or nulliparous or multigravid* or trimester* or obstetric* )

S3 S1 AND S2

S4 AB ((pregnan* or maternal or antenatal or prenatal or perinatal or postnatal or prepartum or antepartum or postpartum or puerper* or "pre partum" or "ante partum" or "post partum") n5 (exercise or "physical* activ*" or "strenuous activit*" or "physical* inactiv*" or sedentary or running or plyometric* or yoga or "tai chi" or "weight training" or "resistance training" or weight* n2 lift* or "lift* weight*" or swim* or sport* or athlet* or walk or walking or mvpa or ltpa or stretching or "aerobic capacity" or fitness or (muscle or muscular or strength*) n2 conditioning)

S5 S3 OR S4

S6 (MH "Birth Weight") OR (MH "Infant, Very Low Birth Weight") OR (MH "Infant, Low Birth Weight+") OR (MH "Fetal Weight") OR (MH "Infant, Small for Gestational Age") OR (MH "Infant, Premature") OR (MH "Infant, Premature, Diseases+") OR (MH "Fetal Growth Retardation") OR (MH "Fetal Anoxia") OR (MH "Fetal Macrosomia") OR (MH "Infant, Postmature") OR (MH "Infant, Large for Gestational Age") OR (MH "Fetus+") OR (MH "Maternal-Fetal Exchange") OR (MH "Perinatal Death") OR (MH "Birth Injuries+") OR (MH "Cerebral Palsy") OR (MH "Neural Tube Defects+") OR (MH "Cleft Palate") OR (MH "Heart Diseases+") OR (MH "Mental Disorders Diagnosed in Childhood+") OR (MH "Pediatric Obesity")

S7 (MH "Uterus+") AND (MH "Blood Circulation+")

S8 ( TI (f#etus or f#etal) or MW (f#etus OR f#etal OR ( placenta* or uteroplacenta* or ("maternal f#etal" or f#etomaternal or transplacental) w2 (transfusion or exchange) or (f#etal or f#etus) w2 (response or matur*) )

S9 ( (f#etal or f#etus or neonat* or newborn or infant) n3 (growth or develop* or viability or viable or weight or wellbeing or "well being" or health or "heart rate" or heartrate or bradycardia or hypoxi* or hypoglyc#emi* or movement or oxygenation) ) OR ( (uterine or uterus) n2 ("blood flow" or circulat*) or (uterine or umbilical or mid* cerebral) n2 doppler ) OR ( "intrauterine growth" or iugr )

S10 ( (perinatal or f#etal or f#etus or neonat* or newborn* or infant*) n3 (mortality or morbidity or death or outcome* or complication*) ) OR ( "still birth" or stillbirth or (preterm or "pre matur*" or prematur* or "post matur*" or postmatur*) w2 (birth or childbirth or labo#r or infant* or newborn* or neonat*) ) OR ( "birth weight" or birthweight or macrosomia or "gestational age" or lga or sga )

S11 ( (perinatal or f#etal or f#etus or neonat* or newborn* or infant*) n3 (mortality or morbidity or death or outcome* or complication*) ) OR ( "still birth" or stillbirth or (preterm or pre matur* or prematur* or post matur* or postmatur*) w2 (birth or childbirth or labo#r or infant* or newborn* or neonat*) ) OR ( "birth weight" or birthweight or macrosomia or gestational age or lga or sga ) OR ( (neonatal or newborn* or infant* or fetus or fetal or foetus or foetal) and (fat* or "abdominal circumference" or "body composition" or bmi or "body mass index" or "waist circumference" or "skeletal size" or height or anthropometric* or apgar or adipos* or ph or base n2 excess or metabolic or acidosis or insulin or diabet* or hyperbilirubin#emi*) )

S12 ( (MH "Adaptation, Physiological") OR MM metabolism ) AND ( f#etus or f#etal )

S13 ( (birth or delivery) n3 (trauma or injur* or defect*) or dystocia or nicu or "neonatal intensive care" or "brachial plexus" ) OR ( (neonat* or infant* or newborn*) and (ponderal index or skinfold or bmi or body mass index) ) OR ( "cerebral palsy" or "neural tube defect*" or "spina bifida" or anencephal* or encephalocele* or iniencephal* or "spinal dyraphism" or diastematomyel* or lipomingocele* or lipmyelomeningocele* or meningomyelocele* or "cleft palate*" or "cleft lip*" )

S14 ( (development* or learning or intellectual* or cognitive* or language or communication or speech or motor) n2 (disorder* or disab* or delay*) ) OR ( "behavio#r disorder*" or "attention deficit" or autis* or asperger* or "child development" or "developmental milestone*" or neurodevelopment* or "cognitive development" or "motor development" or "motor skill*" or "psychosocial development" or "chronic disease*" or "chronic illness*" or cardiovascular or cardiometabolic or diabet* or "heart disease*" ) OR ( (child* or p#ediatric) n2 (obes* or overweight) )

S15 S6 OR S7 OR S8 OR S9 OR S10 OR S11 OR S12 OR S13 OR S14

S16 S5 AND S15

### Sport Discus/Child Development & Adolescent Studies/ERIC

S1 exercise or "physical* activ*" or "strenuous activit*" or "physical* inactiv*" or sedentary or running or plyometric* or yoga or "tai chi" or "weight training" or "resistance training" or swim* or sport* or athlet* or walk or walking or mvpa or ltpa or stretching or "aerobic capacity" or fitness or weight* n2 lift* or (muscle or muscular or strength*) n2 conditioning

S2 pregnan* or antenatal or prenatal or perinatal or postnatal or prepartum or antepartum or postpartum or "pre partum" or "ante partum" or "post partum" or puerper* or primigravid* or primiparous or multiparous or nulliparous or multigravid* or trimester* or obstetric*

S3 S1 and S2

S4 ( f#etus or f#etal or ( placenta* or uteroplacenta* or ("maternal f#etal" or f#etomaternal or transplacental) w2 (transfusion or exchange) or (f#etal or f#etus) w2 (response or matur*) ) ) OR ( (f#etal or f#etus or neonat* or newborn or infant) n3 (growth or develop* or viability or viable or weight or wellbeing or "well being" or health or heart rate or heartrate or bradycardia or hypoxi* or hypoglyc#emi* or movement or oxygenation) ) OR ( (uterine or uterus) n2 ("blood flow" or "blood circulat*") or (uterine or umbilical or mid* cerebral) n2 doppler or "intrauterine growth" or iugr )

S5 ( (perinatal or f#etal or f#etus or neonat* or newborn* or infant*) n3 (mortality or morbidity or death or outcome* or complication*) ) OR ( "still birth" or stillbirth or (preterm or "pre matur*" or prematur* or "post matur*" or postmatur*) w2 (birth or childbirth or labo#r or infant* or newborn* or neonat*) ) OR ( “birth weight" or birthweight or macrosomia or "gestational age" or lga or sga ) OR ( (neonatal or newborn* or infant* or f#etus or f#etal) and (fat* or "abdominal circumference" or "body composition" or bmi or "body mass index" or "waist circumference" or "skeletal size" or height or anthropometric* or apgar or adipos* or ph or base n2 excess or metabolic or acidosis or insulin or diabet* or hyperbilirubin#emi*) )

S6 ( birth or delivery) n3 (trauma or injur* or defect*) or dystocia or nicu or "neonatal intensive care" or "brachial plexus" ) OR ( (neonat* or infant* or newborn*) and ("ponderal index" or skinfold or bmi or body mass index) ) OR ( "cerebral palsy" or "neural tube defect*" or "spina bifida" or anencephal* or encephalocele* or iniencephal* or "spinal dyraphism" or diastematomyel* or lipomingocele* or lipmyelomeningocele* or meningomyelocele* or "cleft palate*" or "cleft lip*" )

S7 ( (development* or learning or intellectual* or cognitive* or language or communication or speech or motor) n2 (disorder* or disab* or delay*) ) OR ( "behavio#r disorder*" or "attention deficit" or autis* or asperger* or "child development" or "developmental milestone*" or neurodevelopment* or "cognitive development" or "motor development" or "motor skill*" or "psychosocial development" or "chronic disease*" or "chronic illness*" or cardiovascular or cardiometabolic or diabet* or "heart disease*" ) OR ( (child* or p#ediatric) n2 (obes* or overweight) )

S8 S4 OR S5 OR S6 OR S7

S9 S3 AND S8

### Scopus

((TITLE-ABS-KEY( fetus or fetal or foetus or foetal or "intrauterine growth" or iugr) OR TITLE-ABS-KEY((placenta* or uteroplacenta* or "maternal fetal" or "maternal foetal" or fetomaternal or foetomaternal or transplacental) w/2 transfusion)) or (TITLE-ABS-KEY((fetal or foetal or fetus or foetus) w/2 (response or matur*))) or (TITLE-ABS-KEY ( ( ( uterine OR uterus ) W/2 ( "blood flow" OR circulat* ) ) OR ( ( uterine OR umbilical OR "mid* cerebral" ) W/2 doppler ) OR "intrauterine growth" OR iugr )) or (TITLE-ABS-KEY((fetal or foetal or fetus or foetus or neonat* or newborn or infant) and (growth or develop* or viability or viable or weight or wellbeing or "well being" or health or heart rate or heartrate or bradycardia or hypoxi* or hypoglycemi* or hypoglycaemi* or movement or oxygenation))) or (TITLE-ABS-KEY("still birth" or stillbirth or ((preterm or "pre matur*" or prematur* or "post matur*" or postmatur*) w/2 (birth or childbirth or labor or labour or infant* or newborn* or neonat*))) OR TITLE-ABS-KEY(( "birth weight" or birthweight or macrosomia or "gestational age" or lga or sga ) ) OR TITLE-ABS-KEY(((neonatal or newborn* or infant* or fetus or fetal or foetus or foetal) and (fat* or "abdominal circumference" or "body composition" or bmi or "body mass index" or "waist circumference" or "skeletal size" or height or anthropometric* or apgar or adipos* or ph or "base excess" or metabolic or acidosis or insulin or diabet* or hyperbilirubinemi* or hyperbilirubinaemi*)))) or (TITLE-ABS-KEY((perinatal or fetal or fetus or foetal or foetus or neonat* or newborn* or infant*) W/3 (mortality or morbidity or death or outcome* or complication*) )) or (TITLE-ABS-KEY((( birth or delivery) w/3 (trauma or injur* or defect*)) or dystocia or nicu or "neonatal intensive care" or "brachial plexus" ) OR TITLE-ABS-KEY(( (neonat* or infant* or newborn*) and ("ponderal index" or skinfold or bmi or body mass index) ) ) OR TITLE-ABS-KEY("cerebral palsy" or "neural tube defect*" or "spina bifida" or anencephal* or encephalocele* or iniencephal* or "spinal dyraphism" or diastematomyel* or lipomingocele* or lipmyelomeningocele* or meningomyelocele* or "cleft palate*" or "cleft lip" )) or (TITLE-ABS-KEY(( (development* or learning or intellectual* or cognitive* or language or communication or speech or motor) w/2 (disorder* or disab* or delay*) )) OR TITLE-ABS-KEY("behavior disorder*" or "behaviour disorder*" or "attention deficit" or autis* or asperger* or "child development" or "developmental milestone*" or neurodevelopment* or "cognitive development" or "motor development" or "motor skill*" or "psychosocial development" or "chronic disease*" or cardiovascular or cardiometabolic or diabet* or "heart disease*") OR TITLE-ABS-KEY(( (child* or pediatric or paediatric) w/2 (obes* or overweight) )))) and ((TITLE( exercise* OR "physical* activ*" OR "strenuous activit*" OR "physical inactiv*" OR sedentary OR running OR plyometric* OR yoga OR "tai chi" OR "weight training" OR "resistance training" OR swim* OR sport* OR athlet* OR walk OR walking OR "muscle strengthening" OR "muscle conditioning" OR "muscular conditioning" OR "weight lifting" OR "lifting weight*" )) AND (TITLE-ABS-KEY ( pregnan* or antenatal or prenatal or perinatal or postnatal or prepartum or antepartum or postpartum or "pre partum" or "ante partum" or "post partum" or puerper* or primigravid* or primiparous or multiparous or nulliparous or multigravid* or trimester* or obstetric*))) AND NOT TITLE-ABS-KEY(rat or rats or mouse or mice or cow or cows or bovine or cattle or sheep or ewe*)

### Web of Science Core Collection (including Emerging Sources Citation Index)

#1 TI=(exercise* or "physical* activ*" or "strenuous activit*" or "physical inactiv*" or sedentary or running or plyometric* or yoga or "tai chi" or "weight training" or "resistance training" or swim* or sport* or athlet* or walk or walking or (muscle* or muscular or strength) near/2 conditioning or weight* near/2 lift*)

#2 TS=(pregnan* or antenatal or prenatal or perinatal or postnatal or prepartum or antepartum or postpartum or pre partum or ante partum or post partum or puerper* or primigravid* or primiparous or multiparous or nulliparous or multigravid* or trimester* or obstetric*)

#3 #1 AND #2

#4 TI=(f$etus or f$etal) or TS=(placenta* or uteroplacenta* or ("maternal f$etal" or f$etomaternal or transplacental) near/2 (transfusion or exchange) or (f$etal or f$etus) near/2 (response or matur*) )

#5 TS=((f$etal or f$etus or neonat* or newborn or infant) near/3 (growth or develop* or viability or viable or weight or wellbeing or "well being" or health or "heart rate" or heartrate or bradycardia or hypoxi* or hypoglyc$emi* or movement or oxygenation) OR (uterine or uterus) near/2 ("blood flow" or "circulat*") or ((uterine or umbilical or "mid* cerebral") near/2 doppler) OR "intrauterine growth" or iugr )

#6 TS=( (perinatal or f$etal or f$etus or neonat* or newborn* or infant*) near/3 (mortality or morbidity or death or outcome* or complication*) OR "still birth" or stillbirth OR "birth weight" or birthweight or macrosomia or "gestational age" or lga or sga )

#7 TS=( (perinatal or f$etal or f$etus or neonat* or newborn* or infant*) near/3 (mortality or morbidity or death or outcome* or complication*) OR "still birth" or stillbirth or (preterm or "pre matur*" or prematur* or "post matur*" or postmatur*) near/2 (birth or childbirth or labo$r or infant* or newborn* or neonat*) OR "birth weight" or birthweight or macrosomia or gestational age or lga or sga OR (neonatal or newborn* or infant* or f$etus or f$etal) and (fat* or "abdominal circumference" or "body composition" or bmi or "body mass index" or "waist circumference" or "skeletal size" or height or anthropometric* or apgar or adipos* or ph or base near/2 excess or metabolic or acidosis or insulin or diabet* or hyperbilirubin$emi*))

#8 TS=((birth or delivery) near/3 (trauma or injur* or defect*) or dystocia or nicu or "neonatal intensive care" or "brachial plexus" OR ( (neonat* or infant* or newborn*) and (ponderal index or skinfold or bmi or body mass index) ) OR "cerebral palsy" or "neural tube defect*" or "spina bifida" or anencephal* or encephalocele* or iniencephal* or "spinal dyraphism" or diastematomyel* or lipomingocele* or lipmyelomeningocele* or meningomyelocele* or "cleft palate*" or "cleft lip*" )

#9 TS=( (development* or learning or intellectual* or cognitive* or language or communication or speech or motor) near/2 (disorder* or disab* or delay*) OR "behavio$r disorder*" or "attention deficit" or autis* or asperger* or "child development" or "developmental milestone*" or neurodevelopment* or "cognitive development" or "motor development" or "motor skill*" or "psychosocial development" or "chronic disease*" or "chronic illness*" or cardiovascular or cardiometabolic or diabet* or "heart disease*" OR (child* or p$ediatric) near/2 (obes* or overweight) )

#10 #9 OR #8 OR #7 OR #6 OR #5 OR #4

#11 #3 AND #10

#12 TS=(rat or rats or mouse or mice or cow or cows or bovine or cattle or sheep or ewe*)

#13 #11 NOT #12

### Clinicatrials.gov

(exercise OR "physical activity" ) AND (antenatal OR prenatal OR perinatal OR postnatal OR prepartum OR antepartum OR postpartum OR "pre partum" OR fetus OR foetus OR fetal OR foetal)

(exercise OR "physical activity" ) AND ("ante partum" OR "post partum" OR puerper* OR primigravida OR primiparous OR multiparous OR nulliparous OR multigravida OR trimester OR trimesters OR obstetric)

### Trip Database

title(exercise OR "physical activity" ) AND title(pregnan* or antenatal OR prenatal OR perinatal OR postnatal OR prepartum OR antepartum OR postpartum OR "pre partum" OR fetus OR foetus OR fetal OR foetal)

# Exclusion list with reasons

| No outcome of interest |
| --- |
| **A. A. Amaeze, M. T. Anasonye, U. O. Abaraogu, S. E. Igwe and U. A. C. Okafor.** Birth weight does not associate with gestational physical activity profile: A retrospective cohort study. *African Journal for Physical, Health Education, Recreation & Dance.* 2015. 21:860-868 |
| **A. A. Johnson, E. M. Knight, C. H. Edwards, et al.** Selected lifestyle practices in urban African American women--relationships to pregnancy outcome, dietary intakes and anthropometric measurements. *J.Nutr.* 1994. 124:963S-972S |
| **A. Alegre, F. Rodriguez-Escudero, E. Cruz and M. Prada.** Influence of work during pregnancy on fetal weight. *J.Reprod.Med.* 1984. 29:334-336 |
| **A. B. Granath, M. S. Hellgren and R. K. Gunnarsson.** Water aerobics reduces sick leave due to low back pain during pregnancy. *Journal of obstetric, gynecologic, and neonatal nursing : JOGNN.* 2006. 35:465-471 |
| **A. Bener and N. M. Saleh.** The impact of socio-economic, lifestyle habits, and obesity in developing of pregnancy-induced hypertension in fast-growing country: global comparisons. 2013. 40:52-57 |
| **A. Bergmann, M. Zygmunt and J. F. Clapp 3.** Running throughout pregnancy: effect on placental villous vascular volume and cell proliferation. *Placenta.* 2004. 25:694-698 |
| **A. Bertolotto, L. Volpe, A. Calianno, et al.** Physical activity and dietary habits during pregnancy: effects on glucose tolerance. *Journal of Maternal-Fetal & Neonatal Medicine.* 2010. 23:1310-1314 |
| **A. Besnier, P. Therme and T. Marqueste.** Influence of physical activity and sports practice before and during pregnancy on the development of gestational diabetes. *Revue Sage - Femme.* 2015. |
| **A. Bonen, P. Campagna, L. Gilchrist, D. C. Young and P. Beresford.** Substrate and endocrine responses during exercise at selected stages of pregnancy. *J.Appl.Physiol.* 1992. 73:134-142 |
| **A. Bonen, P. D. Campagna, L. Gilchrist and P. Beresford.** Substrate and hormonal responses during exercise classes at selected stages of pregnancy. *Canadian Journal of Applied Physiology.* 1995. 20:440-451 |
| **A. Bowen, N. Stewart, M. Baetz and N. Muhajarine.** Antenatal depression in socially high-risk women in Canada. 2009. 63:414-416 |
| **A. Bugalho, A. Bacci and S. Bergstrom.** Risk factors in Mozambican women with eclampsia: a case-referent study. 2001. 5:30-35 |
| **A. C. Hackney, V. L. Katz, W. J. Watson, M. M. Gall and R. G. McMurray.** Alpha-fetoprotein, prolactin and cortisol responses to maximal exercise during pregnancy. *Scandinavian Journal of Medicine and Science in Sports.* 1993. 3:41-45 |
| **A. Chiolero, G. Paradis and J. S. Kaufman.** Assessing the possible direct effect of birth weight on childhood blood pressure: a sensitivity analysis. *Am.J.Epidemiol.* 2014. 179:4-11 |
| **A. Coban, G. G. Arslan, A. Colakfakioglu and A. Sirlan.** Impact on quality of life and physical ability of pregnancy-related back pain in the third trimester of pregnancy. 2011. 61:1122-1124 |
| **A. Coxon and J. W. Haggith.** The effects of abdominal decompression on vascular haemodynamics in pregnancy and labour. *Journal of Obstetrics & Gynaecology of the British Commonwealth.* 1971. 78:49-54 |
| **A. Croteau, S. Marcoux and C. Brisson.** Work activity in pregnancy, preventive measures, and the risk of delivering a small-for-gestational-age infant. *Am.J.Public Health.* 2006. 96:846-855 |
| **A. D. Larsen, H. Hannerz, M. Juhl, et al.** Psychosocial job strain and risk of adverse birth outcomes: A study within the Danish national birth cohort. 2013. 70:845-851 |
| **A. D. McDonald, B. Armstrong and N. M. Cherry.** Spontaneous abortion and occupation. *Journal of Occupational Medicine.* 1986. 28:1232-1238 |
| **A. D. McDonald, B. Armstrong and N. M. Cherry.** Spontaneous abortion and occupation. 1986. 28:1232-1238 |
| **A. D. McDonald, J. C. McDonald, B. Armstrong, et al.** PMC1007961; Fetal death and work in pregnancy. *Br.J.Ind.Med.* 1988. 45:148-157 |
| **A. D. McDonald, J. C. McDonald, B. Armstrong, N. M. Cherry, A. D. Nolin and D. Robert.** Prematurity and work in pregnancy. *Br.J.Ind.Med.* 1988. 45:56-62 |
| **A. D. Stein, J. M. Rivera and J. M. Pivarnik.** Measuring energy expenditure in habitually active and sedentary pregnant women. *Med.Sci.Sports Exerc.* 2003. 35:1441-1446 |
| **A. Dinc, N. Kizilkaya Beji and O. Yalcin.** Effect of pelvic floor muscle exercises in the treatment of urinary incontinence during pregnancy and the postpartum period. *Int.Urogynecol.J.Pelvic Floor Dysfunct.* 2009. 20:1223-1231 |
| **A. E. Beddoe, C. P. P. Yang, H. P. Kennedy, S. J. Weiss and K. A. Lee.** The Effects of Mindfulness-Based Yoga During Pregnancy on Maternal Psychological and Physical Distress. *Jognn-Journal of Obstetric Gynecologic and Neonatal Nursing.* 2009. 38:310-319 |
| **A. E. Beddoe, K. A. Lee, S. J. Weiss, H. P. Kennedy and C. P. Yang.** Effects of mindful yoga on sleep in pregnant women: a pilot study. 2010. 11:363-370 |
| **A. E. Montpetit, H. Plourde, T. R. Cohen and K. G. Koski.** Modeling the impact of prepregnancy BMI, physical activity, and energy intake on gestational weight gain, infant birth weight, and postpartum weight retention. *Journal of Physical Activity & Health.* 2012. 9:1020-1029 |
| **A. E. Ruifrok, E. Althuizen, N. Oostdam, et al.** PMC4189770; The relationship of objectively measured physical activity and sedentary behaviour with gestational weight gain and birth weight. *Journal of Pregnancy.* 2014. 2014:567379 |
| **A. ElDeeb, A. A. Sabbour, K. Abd-Ghafar and W. A. Ayad.** Effect of Stabilizing Exercises Augmented by Pelvic Floor Training on Postpartum Low Back Pain. *Journal of Womens Health.* 2016. 25:A11 |
| **A. F. Adeniyi and O. O. Ogwumike.** Physical activity and energy expenditure: findings from the Ibadan Pregnant Women's Survey. 2014. 18:117-126 |
| **A. F. Robledo-Colonia, N. Sandoval-Restrepo, Y. F. Mosquera-Valderrama, C. Escobar-Hurtado and R. Ramirez-Velez.** Aerobic exercise training during pregnancy reduces depressive symptoms in nulliparous women: a randomised trial. 2012. 58:9-15 |
| **A. F. Saftlas, N. Logsden-Sackett, W. Wang, R. Woolson and M. B. Bracken.** Work, leisure-time physical activity, and risk of preeclampsia and gestational hypertension. *Am.J.Epidemiol.* 2004. 160:758-765 |
| **A. Fast, L. Weiss, E. J. Ducommun, E. Medina and J. G. Butler.** Low-back pain in pregnancy. Abdominal muscles, sit-up performance, and back pain. 1990. 15:28-30 |
| **A. Ferrara, M. M. Hedderson, C. L. Albright, et al.** A pregnancy and postpartum lifestyle intervention in women with gestational diabetes mellitus reduces diabetes risk factors: a feasibility randomized control trial. 2011. 34:1519-1525 |
| **A. Fraser, K. Tilling, C. Macdonald-Wallis, et al.** Associations of gestational weight gain with maternal body mass index, waist circumference, and blood pressure measured 16 y after pregnancy: The Avon Longitudinal Study of Parents and Children (ALSPAC). *Am.J.Clin.Nutr.* 2011. 93:1285-1292 |
| **A. G. Cramp and L. R. Brawley.** Moms in motion: a group-mediated cognitive-behavioral physical activity intervention. 2006. 3:23 |
| **A. G. Cramp and S. R. Bray.** Pre- and postnatal women's leisure time physical activity patterns: a multilevel longitudinal analysis. 2009. 80:403-411 |
| **A. G. El-Metwalli, A. M. Badawy, L. A. El-Baghdadi and A. El-Wehady.** Occupational physical activity and pregnancy outcome. 2001. 100:41-45 |
| **A. Garshasbi and S. Faghih Zadeh.** The effect of exercise on the intensity of low back pain in pregnant women. *International Journal of Gynaecology & Obstetrics.* 2005. 88:271-275 |
| **A. Gaston and C. A. Vamos.** Leisure-time physical activity patterns and correlates among pregnant women in Ontario, Canada. *Maternal & Child Health Journal.* 2013. 17:477-484 |
| **A. Gaston and H. Prapavessis.** Tired, moody and pregnant? Exercise may be the answer. 2013. 28:1353-1369 |
| **A. Gaston and H. Prapavessis.** Using a combined protection motivation theory and health action process approach intervention to promote exercise during pregnancy. 2014. 37:173-184 |
| **A. Gaston, A. G. Cramp and H. Prapavessis.** Pregnancy--should women put up their feet or lace up their running shoes?: Self-presentation and the exercise stereotype phenomenon during pregnancy. 2012. 34:223-237 |
| **A. Gollenberg, P. Pekow, G. Markenson, K. L. Tucker and L. Chasan-Taber.** Dietary behaviors, physical activity, and cigarette smoking among pregnant Puerto Rican women. *Am.J.Clin.Nutr.* 2008. 87:1844-1851 |
| **A. Goodwin, J. Astbury and J. McMeeken.** Body image and psychological well-being in pregnancy. A comparison of exercisers and non-exercisers. *Australian and New Zealand Journal of Obstetrics and Gynaecology.* 2000. 40:442-447 |
| **A. Goodwin, J. Astbury and J. McMeeken.** Pregnancy: Does it change exercise participation?. 2000. 6:15-26 |
| **A. Gradmark, J. Pomeroy, F. Renstrom, et al.** Physical activity may offset pregnancy-related insulin resistance. *Diabetologia.* 2010. 53:S276 |
| **A. Gradmark, J. Pomeroy, F. Renstrom, et al.** PMC3130709; Physical activity, sedentary behaviors, and estimated insulin sensitivity and secretion in pregnant and non-pregnant women. *BMC Pregnancy & Childbirth.* 2011. 11:44 |
| **A. Gutke, H. C. Ostgaard and B. Oberg.** Predicting persistent pregnancy-related low back pain. 2008. 33:E386-93 |
| **A. Hart, N. Morris, S. B. Osborn and H. P. Wright.** Source: CLML. 5731:14586; Effective uterine bloodflow during exercise in normal and pre-eclamptic pregnancies. *Lancet.* 1956. 271:481-484 |
| **A. Himmelmann, A. Svensson, L. Sigstrom and L. Hansson.** Predictors of blood pressure and left ventricular mass in the young: the Hypertension in Pregnancy Offspring Study. *American Journal of Hypertension.* 1994. 7:381-389 |
| **A. Hui, L. Back, S. Ludwig, et al.** Exercise and dietary intervention increases physical activity, promotes healthy diet and reduces excessive gestational weight gain in pregnant women: A randomized controlled trial in Urban community. *Diabetes.* 2011. 60:A351 |
| **A. Hui, L. Back, S. Ludwig, et al.** Lifestyle intervention on diet and exercise reduced excessive gestational weight gain in pregnant women under a randomised controlled trial. *Bjog-an International Journal of Obstetrics and Gynaecology.* 2012. 119:70-77 |
| **A. J. Agopian, P. J. Lupo, M. A. Canfield, L. E. Mitchell and Defects Prevention National Birth.** Swimming pool use and birth defect risk. *American Journal of Obstetrics & Gynecology.* 2013. 209:219.e1-219.e9 |
| **A. J. Martin Campillo.** Desarrollo motor del periodo prenatal al primer ano de vida, relacion conla Natacion. / Motor development from the prenatal period to the first year of life, relationship with Swimming. *Comunicaciones Tecnicas.* 1992. 5-19 |
| **A. Jakobovits.** The effect of maternal physical activity on fetal breathing movements. *Arch.Gynecol.* 1983. 234:47-48 |
| **A. Jayasudha.** Effect of antenatal exercises on labour outcome among primigravid mothers. *Nurs.J.India.* 2013. 104:10-13 |
| **A. Jukic, K. Evenson, J. Daniels, A. H. Herring, A. Wilcox and K. Hartmann.** A prospective study of the association between vigorous physical activity during pregnancy and length of gestation and birthweight. *Am.J.Epidemiol.* 2010. 171:S33 |
| **A. K. Jenum, K. R. Richardsen, S. Berntsen and K. Morkrid.** Gestational diabetes, insulin resistance and physical activity in pregnancy in a multi-ethnic population - a public health perspective. 2013. 23:45-54 |
| **A. K. Ronnberg, I. Ostlund, H. Fadl, T. Gottvall and K. Nilsson.** Intervention during pregnancy to reduce excessive gestational weight gain-a randomised controlled trial. 2015. 122:537-544 |
| **A. Karabulut, A. U. Derbent, M. Yildirim, S. Simavli and N. O. Turhan.** Evaluation of risk factors and effect of physical activity in caesarean section in nulliparous women. *Journal of Maternal-Fetal & Neonatal Medicine.* 2012. 25:1456-1459 |
| **A. Kariminia, M. E. Chamberlain, J. Keogh and A. Shea.** PMC351839; Randomised controlled trial of effect of hands and knees posturing on incidence of occiput posterior position at birth. *BMJ.* 2004. 328:490 |
| **A. Kerssen, H. W. de Valk and G. H. Visser.** Day-to-day glucose variability during pregnancy in women with Type 1 diabetes mellitus: glucose profiles measured with the Continuous Glucose Monitoring System. 2004. 111:919-924 |
| **A. Khaledan, S. Mirdar, N. S. Motahari Tabari and M. A. Shirvani.** Effect of an Aerobic Exercise Program on Fetal Growth in Pregnant Women. *HAYAT.* 2010. 16:55-64 10p |
| **A. L. Brearley, M. Sherburn, M. P. Galea and S. J. Clarke.** Pregnant women maintain body temperatures within safe limits during moderate-intensity aqua-aerobic classes conducted in pools heated up to 33 degrees Celsius: an observational study. 2015. 61:199-203 |
| **A. L. Deierlein, A. M. Siega-Riz and A. Herring.** Dietary energy density but not glycemic load is associated with gestational weight gain. 2008. 88:693-699 |
| **A. L. Deierlein, A. Siega-Riz and K. R. Evenson.** PMC3387759; Physical activity during pregnancy and risk of hyperglycemia. *Journal of Women's Health.* 2012. 21:769-775 |
| **A. L. Gollenberg, P. Pekow, E. Bertone-Johnson, P. S. Freedson, G. Markenson and L. Chasan-Taber.** Physical activity and risk of small-for-gestational-age birth among predominantly Puerto Rican women. *Maternal & Child Health Journal.* 2011. 15:49-59 |
| **A. L. Gollenberg, P. Pekow, E. R. Bertone-Johnson, P. S. Freedson, G. Markenson and L. Chasan-Taber.** Sedentary behaviors and abnormal glucose tolerance among pregnant Latina women. 2010. 42:1079-1085 |
| **A. L. Hui, L. Back, A. Reid, et al.** Effects of physical activity and dietary intakes on weight gain of pregnant women with normal and above normal prepregnancy weight. *Canadian Journal of Diabetes.* 2012. 1):S8 |
| **A. L. Hui, L. Back, S. Ludwig, et al.** PMC4287470; Effects of lifestyle intervention on dietary intake, physical activity level, and gestational weight gain in pregnant women with different pre-pregnancy Body Mass Index in a randomized control trial. *BMC Pregnancy & Childbirth.* 2014. 14:331 |
| **A. L. Hui, S. Ludwig, P. Gardiner, et al.** Exercise and dietary intervention during pregnancy results in reduced excessive gestational weight gain. *Diabetes.* 2010. Conference Publication: (var.pagings).: |
| **A. L. Hui, S. M. Ludwig, P. Gardiner, et al.** Community-based exercise and dietary intervention during pregnancy: A pilot study. *Canadian Journal of Diabetes.* 2006. 30:169-175 |
| **A. L. Vallim, M. J. Osis, J. G. Cecatti, E. P. Baciuk, C. Silveira and S. R. Cavalcante.** PMC3113331; Water exercises and quality of life during pregnancy. *Reproductive Health.* 2011. 8:14 |
| **A. Lee, J. Karpavicius, E. Gasparini and D. Forster.** Implementing a diet and exercise program for limiting maternal weight gain in obese pregnant women: A pilot study. *Australian and New Zealand Journal of Obstetrics and Gynaecology.* 2012. 52:427-432 |
| **A. Lemos, A. I. de Souza, J. N. Figueiroa, J. E. Cabral-Filho and A. D. de Andrade.** Respiratory muscle strength in pregnancy. 2010. 104:1638-1644 |
| **A. Lewkowitz, B. O'Donnell, S. Nakagawa, J. Vargas, Y. Cheng and M. Zlatnik.** Social media messaging in pregnancy: How Text4Baby compares to popular smart phone applications. *Obstet.Gynecol.* 2014. 1):S249-S250 |
| **A. Liquori, G. Widener and L. Clark.** Effects of a 6-week prenatal water exercise program on physiological parameters and well-being in women with pregnancies in the 2nd-3rd trimesters: a pilot study. *Journal of the Section on Women's Health.* 2003. 27:11-19 9p |
| **A. Lynch, C. Goodman, P. L. Choy, et al.** Maternal physiological responses to swimming training during the second trimester of pregnancy. *Research in Sports Medicine.* 2007. 15:33-45 13p |
| **A. M. Jukic, D. A. Lawlor, M. Juhl, et al.** Physical activity during pregnancy and language development in offspring. *Am.J.Epidemiol.* 2012. 175:S76 |
| **A. M. Jukic, K. R. Evenson, A. H. Herring, A. J. Wilcox, K. E. Hartmann and J. L. Daniels.** NIHMS494001 PMC3749786; Correlates of physical activity at two time points during pregnancy. *Journal of Physical Activity & Health.* 2012. 9:325-335 |
| **A. M. Lynch, C. Goodman, P. L. Choy, et al.** Maternal physiological responses to swimming training during the second trimester of pregnancy. 2007. 15:33-45 |
| **A. M. Petersen, T. L. Leet and R. C. Brownson.** Correlates of physical activity among pregnant women in the United States. *Medicine & Science in Sports & Exercise.* 2005. 37:1748-1753 6p |
| **A. M. Stuebe, E. Oken and M. W. Gillman.** Associations of diet and physical activity during pregnancy with risk for excessive gestational weight gain. *Am.J.Obstet.Gynecol.* 2009. 201:58.e1-58.e8 |
| **A. M. Stuebe, E. Oken, M. W. Gillman, Alison M. Stuebe, Emily Oken and Matthew W. Gillman.** Associations of diet and physical activity during pregnancy with risk for excessive gestational weight gain. *American Journal of Obstetrics & Gynecology.* 2009. 201:58.e8 |
| **A. M. Wallace, D. B. Boyer, A. Dan and K. Holm.** Aerobic exercise, maternal self-esteem, and physical discomforts during pregnancy. 1986. 31:255-262 |
| **A. M. Z. Jukic, K. R. Evenson, A. H. Herring, A. J. Wilcox, K. E. Hartmann and J. L. Daniels.** Correlates of physical activity at two time points during pregnancy. 2012. 9:325-335 |
| **A. McGiveron, S. Foster, J. Pearce, M. A. Taylor, S. McMullen and S. Langley-Evans.** Limiting antenatal weight gain improves maternal health outcomes in severely obese pregnant women: findings of a pragmatic evaluation of a midwife-led intervention. *Journal of Human Nutrition & Dietetics.* 2015. 28 Suppl 1:29-37 |
| **A. Merkx, M. Ausems, L. Bude, R. de Vries and M. J. Nieuwenhuijze.** Weight gain in healthy pregnant women in relation to pre-pregnancy BMI, diet and physical activity. *Midwifery.* 2015. 31:693-701 |
| **A. Murtezani, M. Pacarada, Z. Ibraimi, A. Nevzati and N. Abazi.** The impact of exercise during pregnancy on neonatal outcomes: a randomized controlled trial. *Journal of Sports Medicine & Physical Fitness.* 2014. 54:802-808 |
| **A. Nakagaki, T. Inami, T. Minoura, R. Baba, S. Iwase and M. Sato.** Differences in autonomic neural activity during exercise between the second and third trimesters of pregnancy. *Journal of Obstetrics & Gynaecology Research.* 2016. 42:951-959 |
| **A. Nieto, R. Matorras, M. Serra, P. Valenzuela and J. Molero.** Multivariate analysis of determinants of fetal growth retardation. *European Journal of Obstetrics, Gynecology, & Reproductive Biology.* 1994. 53:107-113 |
| **A. Nieto, R. Matorras, M. Serra, P. Valenzuela and J. Molero.** Multivariate analysis of determinants of fetal growth retardation. 1994. 53:107-113 |
| **A. Opala-Berdzik, B. Bacik, A. Markiewicz, et al.** Comparison of static postural stability in exercising and non-exercising women during the perinatal period. *Medical Science Monitor.* 2014. 20:1865-1870 |
| **A. P. Heenan and L. A. Wolfe.** Plasma acid-base regulation above and below ventilatory threshold in late gestation. *J.Appl.Physiol.* 2000. 88:149-157 |
| **A. P. Heenan and L. A. Wolfe.** Plasma acid-base regulation above and below ventilatory threshold in late gestation. 2000. 88:149-157 |
| **A. P. Heenan and L. A. Wolfe.** Plasma osmolality and the strong ion difference predict respiratory adaptations in pregnant and nonpregnant women. 2003. 81:839-847 |
| **A. P. Heenan, L. A. Wolfe and G. A. Davies.** Maximal exercise testing in late gestation: maternal responses. *Obstetrics & Gynecology.* 2001. 97:127-134 |
| **A. P. Heenan, L. A. Wolfe, G. A. Davies and M. J. McGrath.** Effects of human pregnancy on fluid regulation responses to short-term exercise. *J.Appl.Physiol.* 2003. 95:2321-2327 |
| **A. P. Koemeester, J. P. Broersen and P. E. Treffers.** PMC1128222; Physical work load and gestational age at delivery. *Occupational & Environmental Medicine.* 1995. 52:313-315 |
| **A. R. A. Adegboye, S. Rossner, M. Neovius, P. M. C. Lourenço and Y. Linné.** Relationships between prenatal smoking cessation, gestational weight gain and maternal lifestyle characteristics. 2010. 23:29-35 7 |
| **A. Rakhshani, S. Maharana, N. Raghuram, H. R. Nagendra and P. Venkatram.** Effects of integrated yoga on quality of life and interpersonal relationship of pregnant women. *Quality of life research.* 2010. 19:1447-1455 |
| **A. Restall, R. S. Taylor, J. M. Thompson, et al.** PMC4065732; Risk factors for excessive gestational weight gain in a healthy, nulliparous cohort. *Journal of Obesity.* 2014. 2014:148391 |
| **A. Robledo-Colonia, N. Sandoval-Restrepo, Y. Mosquera-Valderrama, C. Escobar-Hurtado and R. Ramirez-Velez.** Aerobic exercise training during pregnancy reduces depressive symptoms in nulliparous women: a randomised trial. *Journal of Physiotherapy.* 2012. 58:9-15 |
| **A. Rodriguez and G. Bohlin.** Psychosocial predictors of smoking and exercise during pregnancy. 2000. 18:203-223 |
| **A. S. Cavalli and T. Tanaka.** PMC2723239; Relationship between maternal physical activities and preterm birth. *Environmental Health & Preventive Medicine.* 2001. 6:74-81 |
| **A. S. Cavalli and T. Tanaka.** PMC2723549; Maternal leisure-time physical activities are not determinant risk factors of low birthweight babies: A cross-sectional study of 1,714 pregnant women. *Environmental Health & Preventive Medicine.* 2000. 5:72-80 |
| **A. S. Tenforde, K. E. Toth, E. Langen, M. Fredericson and K. L. Sainani.** PMC4332642 Available on 03/01/16]; Running habits of competitive runners during pregnancy and breastfeeding. *Sports Health.* 2015. 7:172-176 |
| **A. Sijtsma, P. J. J. Sauer and E. Corpeleijn.** Parental correlations of physical activity and body mass index in young children- the GECKO Drenthe cohort. *International Journal of Behavioral Nutrition and Physical Activity.* 2015. 12: |
| **A. Spinillo, E. Capuzzo, F. Baltaro, G. Piazza, S. Nicola and A. Iasci.** The effect of work activity in pregnancy on the risk of fetal growth retardation. *Acta Obstet.Gynecol.Scand.* 1996. 75:531-536 |
| **A. Spinillo, E. Capuzzo, L. Colonna, G. Piazzi, S. Nicola and F. Baltaro.** The effect of work activity in pregnancy on the risk of severe preeclampsia. 1995. 35:380-385 |
| **A. Suputtitada, T. Wacharapreechanont and P. Chaisayan.** Effect of the "sitting pelvic tilt exercise" during the third trimester in primigravidas on back pain. *Journal of the Medical Association of Thailand.* 2002. 85 Suppl 1:S170-9 |
| **A. U. Derbent, A. Karabulut, M. Yildirim, S. A. Simavli and N. O. Turhan.** Evaluation of risk factors in cesarean delivery among multiparous women with a history of vaginal delivery. 2012. 13:15-20 |
| **A. V. M. Arizabaleta, L. O. Buitrago, de Plata, A. C. A., M. M. Escudero and R. Ram**. Aerobic exercise during pregnancy improves health-related quality of life: A randomised trial. 2010. 56:253-258 |
| **A. W. Bingham.** The prevention of obstetric complications by diet and exercise. 1932. 23:38-47 |
| **A. Williams, T. Reilly, I. Campbell and J. Sutherst.** Investigation of changes in responses to exercise and in mood during pregnancy. 1988. 31:1539-1549 |
| **A. Wojtyla, L. Kapka-Skrzypczak, P. Bilinski and P. Paprzycki.** Physical activity among women at reproductive age and during pregnancy (Youth Behavioural Polish Survey - YBPS and Pregnancy-related Assessment Monitoring Survay - PrAMS) - epidemiological population studies in Poland during the period 2010-2011. *Annals of Agricultural and Environmental Medicine.* 2011. 18:365-374 |
| **A. Wojtyla, L. Kapka-Skrzypczak, P. Paprzycki, M. Skrzypczak and P. Bilinski.** Epidemiological studies in Poland on effect of physical activity of pregnant women on the health of offspring and future generations - adaptation of the hypothesis development origin of health and diseases. *Annals of Agricultural & Environmental Medicine.* 2012. 19:315-326 |
| **Akhgar Ghassabian, Rajeshwari Sundaram, Amanda Wylie, Erin Bell, Scott C. Bello and Edwina Yeung.** Maternal medical conditions during pregnancy and gross motor development up to age 24 months in the Upstate KIDS study. *Developmental Medicine & Child Neurology.* 2016. 58:728-734 |
| **Akihito Takeuchi, Takashi Yorifuji, Kyohei Takahashi, et al.** Neurodevelopment in full-term small for gestational age infants: A nationwide japanese population-based study. *Brain Dev.* 2016. 38:529-537 |
| **Alison Tovar, Lauren B. Guthrie, Deborah Platek, Alison Stuebe, Sharon J. Herring and Emily Oken.** Modifiable predictors associated with having a gestational weight gain goal. 2011. 15:1119-1126 |
| **Anca Gaston, Philip M. Wilson, Diane E. Mack, Stephanie Elliot and Harry Prapavessis.** Understanding physical activity behavior and cognitions in pregnant women: An application of self-determination theory. 2013. 14:405-412 |
| **André Michael Toschke, Simon Rückinger, Eva Böhler and Rüdiger Von Kries.** Adjusted population attributable fractions and preventable potential of risk factors for childhood obesity. 2007. 10:902-906 5 |
| **Anja Podlesnik Fetih, Mateja Videmšek, Vislava Globevnik Velikonja, Eda Bokal Vrtačnik and Damir Karpljuk.** The state of mind of less physically active and regularly physically active women in the second trimester of their pregnancies. / duševní stay málo a pravidelnĕ tĕlesnĕ akitvních žen ve druhém tremestru tĕhotenstÍ. 2008. 38:37-44 |
| **Anonymous**. Acute Maternal and Fetal Effects of Exercise in Pregnancy. *Clinical Trials.* 2011. |
| **Anonymous**. Descriptive Epidemiology of Objectively Measured Walking Among US Pregnant Women: National Health and Nutrition Examination Survey, 2005-2006. 2015. 12:1-6 6 |
| **Anonymous**. Effectiveness of Video Messaging About Diet, Exercise and Weight Gain in Pregnancy in Regional and National Samples. *Clinical Trials.* 2015. |
| **Anonymous**. Effects of a Physical Exercise Program on Microcirculation and Pregnancy Outcomes in Obese Pregnant Women. *Clinical Trials.* 2015. |
| **Anonymous**. Effects on postpartum weight retention after antenatal lifestyle intervention - a secondary analysis of a randomized controlled trial. *Acta Obstet.Gynecol.Scand.* 2016. 95:999-1007 |
| **Anonymous**. Exercise in pregnancy does not increase preterm birth risk. *Clinical Advisor.* 2016. 19:16 |
| **Anonymous**. Exercise in Pregnancy Evaluative Controlled Study. *Clinical Trials.* 2015. |
| **Anonymous**. Exercise Training in Pregnancy for Obese Mothers. *Clinical Trials.* 2010. |
| **Anonymous**. Fit For Delivery: A Study of the Effect of Exercise Sessions and Nutritional Counselling on Pregnancy Outcome. *Clinical Trials.* 2009. |
| **Anonymous**. Fitness programs benefit mothers-to-be, heart patients. *Health Prog.* 1985. 66:74-75 |
| **Anonymous**. Maternal condition and exercise during pregnancy benefit the unborn well being and labor. 2008. 26:51-58 8 |
| **Anonymous**. Pelvic floor muscle exercises. 2001. 87:650 |
| **Anonymous**. Pregnant women advised to consider exercise risks. (Les femmes enceintes doivent prendre en compte les dangers du sport). *Physician & Sportsmedicine.* 1982. 10:27 |
| **Anonymous**. Pregnant women who swim at reduced risk of preterm birth. *Nursing Standard.* 2010. 24:17 |
| **Anonymous**. Role of Maternal Physical Exercise on Spontaneous Labor Onset. *Clinical Trials.* 2015. |
| **Anonymous**. What is the effect of regular group exercise on maternal psychological outcomes and common pregnancy complaints? An assessor blinded RCT. 2016. 32:81-86 6 |
| **Arati Mahishale and Shobhana Patted.** Effectiveness of Tailor Made Exercise Intervention for Low Back Pain and Pelvic Pain during Pregnancy - A Randomized Controlled Trial. 2014. 8:143-148 6 |
| **Avaya Banerjee, V. Mahalakshmi and R. Baranitharan.** Effect of Antenatal Exercise Program with and without Abdominal Strengthening Exercises on Diastasis Rectus Abdominis - A Post Partum Follow Up. 2013. 7:123-126 4 |
| **B. A. Lewis, B. C. Martinson, N. E. Sherwood and M. D. Avery.** A pilot study evaluating a telephone-based exercise intervention for pregnant and postpartum women. *J.Midwifery Womens Health.* 2011. 56:127-131 |
| **B. A. Meyer and J. R. Daling.** Activity level of mother's usual occupation and low infant birth weight. *Journal of Occupational Medicine.* 1985. 27:841-847 |
| **B. A. Polley, R. R. Wing and C. J. Sims.** Randomized controlled trial to prevent excessive weight gain in pregnant women. 2002. 26:1494-1502 |
| **B. B. Price, S. B. Amini and K. Kappeler.** Exercise in pregnancy: effect on fitness and obstetric outcomes-a randomized trial. *Medicine & Science in Sports & Exercise.* 2012. 44:2263-2269 |
| **B. Banerjee, T. K. Dey and P. Chatterjee.** Estimation of risk of pregnancy wastage due to lifting of heavy weight during pregnancy. *Indian Journal of Occupational and Environmental Medicine.* 2002. 6:13-15 |
| **B. Banerjee, T. K. Dey and P. Chatterjee.** Work related physical exertion and spontaneous abortion. *Indian J.Public Health.* 2005. 49:248-249 |
| **B. Bennett and O. D. Ratnoff.** Changes in antihemophilic factor (AHF, factor 8) procoagulant activity and AHF-like antigen in normal pregnancy, and following exercise and pneumoencephalography. *J.Lab.Clin.Med.* 1972. 80:256-263 |
| **B. Chakaravertty, K. Parkavi, S. A. Coumary and A. J. Felix.** Antepartum cardiorespiratory fitness (CRF) quantification by estimation of maximal oxygen consumption (Vo2 max) in pregnant South Indian women. 2012. 110:214-217 |
| **B. Eskenazi, L. Fenster, S. Wight, P. English, G. C. Windham and S. H. Swan.** Physical exertion as a risk factor for spontaneous abortion. 1994. 5:6-13 |
| **B. Feiner, R. Weksler, G. Ohel and S. Degani.** The influence of maternal exercise on placental blood flow measured by Simultaneous Multigate Spectral Doppler Imaging (SM-SDI). *Ultrasound in Obstetrics & Gynecology.* 2000. 15:498-501 |
| **B. G. Armstrong, A. D. Nolin and A. D. McDonald.** PMC1009753; Work in pregnancy and birth weight for gestational age. *Br.J.Ind.Med.* 1989. 46:196-199 |
| **B. Hackley, H. P. Kennedy, D. C. Berry and G. D. Melkus.** A mixed-methods study on factors influencing prenatal weight gain in ethnic-minority women. 2014. 59:388-398 |
| **B. L. Rooney, C. W. Schauberger and M. A. Mathiason.** Impact of perinatal weight change on long-term obesity and obesity-related illnesses. 2005. 106:1349-1356 |
| **B. Laraia, L. Messer, K. Evenson and J. S. Kaufman.** PMC2232039; Neighborhood factors associated with physical activity and adequacy of weight gain during pregnancy. *Journal of Urban Health.* 2007. 84:793-806 |
| **B. Longo-Mbenza, K. B. Tshimanga, B. Buassa-bu-Tsumbu and M. J. Kabangu.** Diets rich in vegetables and physical activity are associated with a decreased risk of pregnancy induced hypertension among rural women from Kimpese, DR Congo. *Nigerian Journal of Medicine: Journal of the National Association of Resident Doctors of Nigeria.* 2008. 17:265-269 |
| **B. Melton, E. Marshall, H. Bland, M. Schmidt and W. K. Guion.** American rural women's exercise self-efficacy and awareness of exercise benefits and safety during pregnancy. 2013. 15:468-473 |
| **B. Neme, I. Behle and A. U. Dos Santos.** Effects of exercise test on the fetal heart in pregnancies complicated by hypertensive syndrome. Portuguese]. *Maternidade e Infancia.* 1973. 32:323-330 |
| **B. Richardson, K. Campbell, L. Carmichael and J. Patrick.** Effects of external physical stimulation on fetuses near term. *Obstet.Gynecol.* 1981. 139:344-352 |
| **B. S. Fjeldsoe, Y. D. Miller and A. L. Marshall.** MobileMums: a randomized controlled trial of an SMS-based physical activity intervention. 2010. 39:101-111 |
| **B. Sandstrom.** Adjustments of the circulation to orthostatic reaction and physical exercise during the first trimester of primipregnancy. 1974. 53:1-5 |
| **B. Sangsawang and N. Sangsawang.** Is a 6-week supervised pelvic floor muscle exercise program effective in preventing stress urinary incontinence in late pregnancy in primigravid women?: a randomized controlled trial. *European Journal of Obstetrics, Gynecology, & Reproductive Biology.* 2016. 197:103-110 |
| **B. Sangsawang and Y. Serisathien.** Effect of pelvic floor muscle exercise programme on stress urinary incontinence among pregnant women. *J.Adv.Nurs.* 2012. 68:1997-2007 |
| **B. Sternfeld, C. P. Quesenberry, B. Eskenazi and L. A. Newman.** Exercise during pregnancy and pregnancy outcome. / Pratique de l ' exercice physique pendant la grossesse et son incidence sur la grossesse. *Medicine & Science in Sports & Exercise.* 1995. 27:634-640 |
| **B. W. Alderman, H. Zhao, V. L. Holt, D. H. Watts and S. A. A. Beresford.** Maternal physical activity in pregnancy and infant size for gestational age. *Ann.Epidemiol.* 1998. 8:513-519 |
| **Brad Schoenfeld and Gul Tiryaki-Sonmez.** Overcoming Psychosocial Barriers to Maternal Exercise: Intervention Strategies to Improve Participation and Adherence. 2011. 3:61-66 |
| **Brazil University of Campinas.** Physical Exercise Influence Among Overweight and Obese Pregnant Women. 2010. |
| **C. A. Guzman and R. Caplan.** Cardiorespiratory response to exercise during pregnancy. *Obstet.Gynecol.* 1970. 108:600-605 |
| **C. A. Guzman, R. Caplan and M. R. Becklake.** Cardiorespiratory response to exercise during pregnancy. 1969. 28:786-& |
| **C. A. Hickey, S. P. Cliver, F. X. Mulvihill, S. F. McNeal, H. J. Hoffman and R. L. Goldenberg.** Employment-related stress and preterm delivery: a contextual examination. 1995. 110:410-418 |
| **C. A. Nielsen, I. Sigsgaard, M. Olsen, M. Tolstrup, B. Danneskiold-Samsoee and J. E. Bock.** Trainability of the pelvic floor. A prospective study during pregnancy and after delivery. 1988. 67:437-440 |
| **C. A. Snapp and S. K. Donaldson.** Gestational diabetes mellitus: physical exercise and health outcomes. 2008. 10:145-155 |
| **C. A. Snijder, T. Brand, V. Jaddoe, et al.** Physically demanding work, fetal growth and the risk of adverse birth outcomes. The Generation R Study. *Occupational & Environmental Medicine.* 2012. 69:543-550 |
| **C. A. Vamos, S. Flory, H. Sun, et al.** Do Physical Activity Patterns Across the Lifecourse Impact Birth Outcomes?. 2015. 19:1775-1782 |
| **C. A. Vinter, D. M. Jensen, P. Ovesen, H. Beck-Nielsen and J. S. Jorgensen.** The LiP (Lifestyle in Pregnancy) study: A randomized controlled trial of lifestyle intervention in 360 obese pregnant women. *Diabetes Care.* 2011. 34:2502-2507 |
| **C. Abeysena and P. Jayawardana.** Sleep deprivation, physical activity and low income are risk factors for inadequate weight gain during pregnancy: A cohort study. *J.Obstet.Gynaecol.Res.* 2011. 37:734-740 |
| **C. Abeysena, P. Jayawardana and A. Seneviratne Rde.** Effect of psychosocial stress and physical activity on preterm birth: a cohort study. *Journal of Obstetrics & Gynaecology Research.* 2010. 36:260-267 |
| **C. Abeysena, P. Jayawardana and A. Seneviratne Rde.** Effect of psychosocial stress and physical activity on low birthweight: a cohort study. *Journal of Obstetrics & Gynaecology Research.* 2010. 36:296-303 |
| **C. Albright, J. E. Maddock and C. R. Nigg.** Physical activity before pregnancy and following childbirth in a multiethnic sample of healthy women in Hawaii. 2005. 42:95-110 |
| **C. Amezcua-Prieto, P. Lardelli-Claret, R. Olmedo-Requena, J. Mozas-Moreno, A. Bueno-Cavanillas and J. J. Jimenez-Moleon.** Compliance with leisure-time physical activity recommendations in pregnant women. 2011. 90:245-252 |
| **C. B. Eaton, J. Maccani, G. Agha, et al.** Adverse early life exposures and carotid atherosclerosis in midlife: Leap study. *Circulation.* 2014. 129: |
| **C. B. Olsson, L. Nilsson-Wikmar and W. J. Grooten.** Determinants for lumbopelvic pain 6 months postpartum. 2012. 34:416-422 |
| **C. B. Rudra, T. K. Sorensen, D. A. Luthy and M. A. Williams.** A prospective analysis of recreational physical activity and preeclampsia risk. *Med.Sci.Sports Exerc.* 2008. 40:1581-1588 |
| **C. Bish, S. Chu, C. Shapiro-Mendoza, A. Sharma and H. M. Blanck.** Trying to lose or maintain weight during pregnancy -- United States, 2003. 2009. 13:286-292 7 |
| **C. Botkin and C. E. Driscoll.** Maternal aerobic exercise: newborn effects. *Fam.Pract.Res.J.* 1991. 11:387-393 |
| **C. C. D. Perkins, J. M. Pivarnik, N. Paneth and A. D. Stein.** Physical activity and fetal growth during pregnancy. *Obstet.Gynecol.* 2007. 109:81-87 |
| **C. C. M. Röst, J. Jacqueline, A. Kaiser, A. P. Verhagen and B. W. Koes.** Pelvic pain during pregnancy: a descriptive study of signs and symptoms of 870 patients in primary care. 2004. 29:2567-2572 6 |
| **C. C. Perkins, J. M. Pivarnik, N. Paneth and A. D. Stein.** Physical activity and fetal growth during pregnancy.Erratum appears in Obstet Gynecol. 2007 Apr;109(4):1002 Note: Stein, Aryeth D corrected to Stein, Aryeh D]]. *Obstetrics & Gynecology.* 2007. 109:81-87 |
| **C. Coll, M. Domingues, I. Santos, A. Matijasevich, B. L. Horta and P. C. Hallal.** Changes in Leisure-Time Physical Activity From the Prepregnancy to the Postpartum Period: 2004 Pelotas (Brazil) Birth Cohort Study. *Journal of Physical Activity & Health.* 2016. 13:361-365 |
| **C. D. Peterson, M. Haas and W. T. Gregory.** A pilot randomized controlled trial comparing the efficacy of exercise, spinal manipulation, and neuro emotional technique for the treatment of pregnancy-related low back pain. 2012. 20:18 |
| **C. de Oliveira, M. A. Lopes, Carla Longo e Pereira, L. and M. Zugaib.** Effects of pelvic floor muscle training during pregnancy. 2007. 62:439-446 |
| **C. Dominguez de Costa, A. Lerdo de Tejada, P. Eisenberg de Smoler, et al.** [Decrease of Ac. 5-HIA excretion in urine induced by exercise in pregnant women]. 1978. 44:347-353 |
| **C. E. Mbada, O. E. Adebayo, A. B. Adeyemi, et al.** Knowledge and Attitude of Nigerian Pregnant Women towards Antenatal Exercise: A Cross-Sectional Survey. 2014. 2014:260539 |
| **C. E. Mbada, O. E. Adebayo, T. O. Awotidebe, et al.** Practice and pattern of antenatal and postnatal exercise among Nigerian women: A cross-sectional study. 2015. 3:93-98 |
| **C. Elliott, S. Houghton and S. Langsford.** The use of visual prompts to increase kegel exercise performance in pregnant women: A case study. 1997. 14:231-235 |
| **C. F. Lee, F. M. Hwang, H. M. Lin, L. K. Chi and L. Y. Chien.** The Physical Activity Patterns of Pregnant Taiwanese Women. *Journal of Nursing Research.* 2016. 24:291-299 |
| **C. F. Lee, I. C. Chiang, F. M. Hwang, L. K. Chi and H. M. Lin.** Using the Theory of Planned Behavior to predict pregnant women's intention to engage in regular exercise. *Midwifery.* 2016. 42:80-86 |
| **C. F. Yan, Y. C. Hung, M. L. Gau and K. C. Lin.** Effects of a stability ball exercise programme on low back pain and daily life interference during pregnancy. *Midwifery.* 2014. 30:412-419 |
| **C. Ferreira, H. Dutra, L. Dias, et al.** Heart rate and blood pressure in response to pelvic floor muscle training during pregnancy. *Int.Urogynecol.J.Pelvic Floor Dysfunct.* 2011. 22:S1471-S1472 |
| **C. Fleten, H. Stigum, P. Magnus and W. Nystad.** Exercise during pregnancy, maternal prepregnancy body mass index, and birth weight. *Obstetrics & Gynecology.* 2010. 115:331-337 |
| **C. G. Dominguez, P. E. De Smoler, J. Armas Dominguez, S. Karchmer and D. Skromne.** Electrocardiography, stress and the third pregnancy trimester]. *Arch.Inst.Cardiol.Mex.* 1976. 46:74-81 |
| **C. H. Chuang, M. R. Stengel, S. W. Hwang, D. Velott, K. H. Kjerulff and J. L. Kraschnewski.** Behaviours of overweight and obese women during pregnancy who achieve and exceed recommended gestational weight gain. 2014. 8:e577-83 |
| **C. H. Ferreira, L. M. Naldoni, S. Ribeiro Jdos, M. C. Meirelles, C. Cavalli Rde and K. Bo.** Maternal blood pressure and heart rate response to pelvic floor muscle training during pregnancy. 2014. 93:678-683 |
| **C. H. Ferreira, L. M. V. Naldoni, J. D. S. Ribeiro, M. C. C. C. Meirelles, R. D. C. Cavalli and K. Bo.** Maternal blood pressure and heart rate response to pelvic floor muscle training during pregnancy. *Acta Obstet.Gynecol.Scand.* 2014. 93:678-683 |
| **C. J. Homer, S. A. Beresford, S. A. James, E. Siegel and S. Wilcox.** Work-related physical exertion and risk of preterm, low birthweight delivery. *Paediatr.Perinat.Epidemiol.* 1990. 4:161-174 |
| **C. J. Spaaij, J. M. van Raaij, L. C. de Groot, van der Heijden, L. J., H. A. Boekholt and J. G. Hautvast.** No changes during pregnancy in the net cost of cycling exercise. 1994. 48:513-521 |
| **C. J. Vladutiu, K. R. Evenson and S. W. Marshall.** Physical Activity and Injuries During Pregnancy. *Journal of Physical Activity & Health.* 2010. 7:761-769 |
| **C. Kim, L. N. McEwen, E. C. Kieffer, W. H. Herman and J. D. Piette.** NIHMS614289 PMC4139034; Self-efficacy, social support, and associations with physical activity and body mass index among women with histories of gestational diabetes mellitus. *Diabetes Educ.* 2008. 34:719-728 |
| **C. Kim, M. Draska, M. L. Hess, E. J. Wilson and C. R. Richardson.** NIHMS614297 PMC4139030; A web-based pedometer programme in women with a recent history of gestational diabetes. *Diabetic Med.* 2012. 29:278-283 |
| **C. L. Battle, L. A. Uebelacker, S. R. Magee, K. A. Sutton and I. W. Miller.** Potential for prenatal yoga to serve as an intervention to treat depression during pregnancy. 2015. 25:134-141 |
| **C. L. Butler, M. A. Williams, T. K. Sorensen, I. O. Frederick and W. M. Leisenring.** Relation between maternal recreational physical activity and plasma lipids in early pregnancy. *Am.J.Epidemiol.* 2004. 160:350-359 |
| **C. L. Harrison, C. B. Lombard and H. J. Teede.** PMC4221718; Limiting postpartum weight retention through early antenatal intervention: the HeLP-her randomised controlled trial. *International Journal of Behavioral Nutrition & Physical Activity.* 2014. 11:134 |
| **C. L. Harrison, C. B. Lombard and H. J. Teede.** Understanding early pregnancy health behaviours among overweight and obese women at risk of gestational diabetes mellitus. *Obesity Research and Clinical Practice.* 2011. 5:S27 |
| **C. L. Harrison, C. B. Lombard and H. J. Teede.** Understanding health behaviours in a cohort of pregnant women at risk of gestational diabetes mellitus: an observational study. *BJOG: An International Journal of Obstetrics & Gynaecology.* 2012. 119:731-738 |
| **C. L. Harrison, C. B. Lombard, B. J. Strauss and H. J. Teede.** Optimizing healthy gestational weight gain in women at high risk of gestational diabetes: a randomized controlled trial. *Obesity.* 2013. 21:904-909 |
| **C. L. Harrison, R. G. Thompson, H. J. Teede and C. B. Lombard.** Measuring physical activity during pregnancy. *International Journal of Behavioral Nutrition and Physical Activity.* 2011. 8: |
| **C. L. Martin and L. R. Brunner Huber.** Physical activity and hypertensive complications during pregnancy: findings from 2004 to 2006 North Carolina Pregnancy Risk Assessment Monitoring System. 2010. 37:202-210 |
| **C. M. Chiarello, L. A. Falzone, K. E. McCaslin, M. N. Patel and K. R. Ulery.** The effects of an exercise program on diastasis recti abdominis in pregnant women [corrected] [published erratum appears in *J womens health phys ther* 2005;29(3):76]. 2005. 29:11-16 6 |
| **C. M. Cottrill, J. M. Kotchen, G. Guthrie and T. Kotchen.** Cardiovascular responses to exercise following adolescent hypertensive pregnancy. *Journal of Adolescent Health Care.* 1980. 1:91-95 |
| **C. M. Devine, C. F. Bove and C. M. Olson.** Continuity and change in women's weight orientations and lifestyle practices through pregnancy and the postpartum period: the influence of life course trajectories and transitional events. 2000. 50:567-582 |
| **C. M. Olson and M. S. Strawderman.** Modifiable behavioral factors in a biopsychosocial model predict inadequate and excessive gestational weight gain. 2003. 103:48-54 |
| **C. M. Olson, M. S. Strawderman, P. S. Hinton and T. A. Pearson.** Gestational weight gain and postpartum behaviors associated with weight change from early pregnancy to 1 y postpartum. *International Journal of Obesity & Related Metabolic Disorders: Journal of the International Association for the Study of Obesity.* 2003. 27:117-127 |
| **C. M. Sampselle, J. M. Miller, B. L. Mims, J. O. Delancey, J. A. Ashton-Miller and C. L. Antonakos.** Effect of pelvic muscle exercise on transient incontinence during pregnancy and after birth. 1998. 91:406-412 |
| **C. Mattocks, A. Ness, K. Deere, et al.** Early life determinants of physical activity in 11 to 12 year olds: cohort study. 2008. 336:26-29 |
| **C. McParlin, S. C. Robson, P. W. G. Tennant, et al.** Objectively measured physical activity during pregnancy: A study in obese and overweight women. *BMC Pregnancy and Childbirth.* 2010. 10: |
| **C. N. Spracklen, K. K. Ryckman, E. W. Triche and A. F. Saftlas.** Physical Activity During Pregnancy and Subsequent Risk of Preeclampsia and Gestational Hypertension: A Case Control Study. *Maternal & Child Health Journal.* 2016. 20:1193-1202 |
| **C. Nav**. Analizando la relación entre el aumento del peso fetal y la realización de ejercicio físico. / exploring the relationship between the fetusweight gain and the practice of physical activity. *Journal of Sport & Health Research.* 2013. 5:319-322 |
| **C. Nobles, B. H. Marcus, E. J. Stanek 3, et al.** NIHMS656730 Available on 05/01/16] PMC4418021 Available on 05/01/16]; Effect of an exercise intervention on gestational diabetes mellitus: a randomized controlled trial. *Obstetrics & Gynecology.* 2015. 125:1195-1204 |
| **C. P. Ribeiro and H. Milanez.** PMC3220627; Knowledge, attitude and practice of women in Campinas, Sao Paulo, Brazil with respect to physical exercise in pregnancy: a descriptive study. *Reproductive Health.* 2011. 8:31 |
| **C. Pavlou, T. Chard, J. Landon and A. T. Letchworth.** Circulating levels of human placental lactogen in late pregnancy: the effect of glucose loading, smoking and exercise. 1973. 3:45-49 |
| **C. R. Beckmann and C. A. Beckmann.** Effect of a structured antepartum exercise program on pregnancy and labor outcome in primiparas. *J.Reprod.Med.* 1990. 35:704-709 |
| **C. R. Holroyd, N. C. Harvey, S. R. Crozier, et al.** EMS53569 PMC3800076; Placental size at 19 weeks predicts offspring bone mass at birth: findings from the Southampton Women's Survey. *Placenta.* 2012. 33:623-629 |
| **C. S. Deshpande, A. Rakhshani, R. Nagarathna, et al.** Yoga for high-risk pregnancy: a randomized controlled trial.[Erratum appears in Ann Med Health Sci Res. 2014 Nov;4(6):978 Note: Rakshani, A [corrected to Rakhshani, A]]. 2013. 3:341-344 |
| **C. S. Harrod, L. Chasan-Taber, R. M. Reynolds, et al.** Physical Activity during Pregnancy and Neonatal Fat Mass: The Healthy Start Study. *Diabetes.* 2014. 63:A42 |
| **C. S. Rabkin, H. R. Anderson, J. M. Bland, O. G. Brooke, G. Chamberlain and J. L. Peacock.** Maternal activity and birth weight: a prospective, population-based study. *Am.J.Epidemiol.* 1990. 131:522-531 |
| **C. Savi, G. Milic-Emili and E. De Minicis.** [The physiology of muscullar exercise in women at the termination of pregnancy]. 1959. 58:403-412 |
| **C. Schou Andersen, M. Juhl, M. Gamborg, T. I. Sorensen and E. A. Nohr.** PMC3324144; Maternal Recreational Exercise during Pregnancy in relation to Children's BMI at 7 Years of Age. *International Journal of Pediatrics.* 2012. 2012:920583 |
| **C. Taniguchi and C. Sato.** Home-based walking during pregnancy affects mood and birth outcomes among sedentary women: A randomized controlled trial. *Int.J.Nurs.Pract.* 2016. 7:7 |
| **C. Taves, J. Charteris and J. C. Wall.** The kinematics of treadmill walking during pregnancy. *Physiotherapy Canada.* 1982. 34:321-324 |
| **C. Tragea, G. P. Chrousos, E. C. Alexopoulos and C. Darviri.** A randomized controlled trial of the effects of a stress management programme during pregnancy. 2014. 22:203-211 |
| **C. W. Burnett.** The value of antenatal exercises. 1956. 63:40-57 |
| **C. W. Ko, P. G. Napolitano, S. P. Lee, S. D. Schulte, M. A. Ciol and S. A. Beresford.** Physical activity, maternal metabolic measures, and the incidence of gallbladder sludge or stones during pregnancy: a randomized trial. *Am.J.Perinatol.* 2014. 31:39-48 |
| **C. W. Waage, I. Mdala, A. K. Jenum, T. M. Michelsen, K. I. Birkeland and L. Sletner.** Ethnic differences in blood pressure from early pregnancy to postpartum: a Norwegian cohort study. *J.Hypertens.* 2016. 34:1151-1159 |
| **C. Wang, W. Zhu, Y. Wei, H. Feng, R. Su and H. Yang.** PMC4603976; Exercise intervention during pregnancy can be used to manage weight gain and improve pregnancy outcomes in women with gestational diabetes mellitus. *BMC Pregnancy & Childbirth.* 2015. 15:255 |
| **C. Ward-Ritacco, M. S. Poudevigne and P. J. O'Connor.** Muscle strengthening exercises during pregnancy are associated with increased energy and reduced fatigue. *Journal of Psychosomatic Obstetrics & Gynecology.* 2016. 37:68-72 |
| **C. Wharton and M. J. Benton.** DataBase: research and evaluation results. Resistance exercise decreases the need for insulin in overweight women with gestational diabetes mellitus. *American Journal of Health Promotion.* 2006. 20:441-442 2p |
| **C. Woldringh, M. van den Wijngaart, P. Albers-Heitner, Lycklama a Nijeholt, A. A. and T. Lagro-Janssen.** Pelvic floor muscle training is not effective in women with UI in pregnancy: a randomised controlled trial. 2007. 18:383-390 |
| **C. Wuertz, P. Gilbert, W. Baier and C. Kunz.** Cross-sectional study of factors that influence the 25-hydroxyvitamin D status in pregnant women and in cord blood in Germany. *Br.J.Nutr.* 2013. 110:1895-1902 |
| **C. Y. Yates, L. M. Boylan, R. D. Lewis and J. A. Driskell.** Maternal aerobic exercise and vitamin B-6 status. 1988. 48:117-121 |
| **C. Zhang, C. G. Solomon, J. E. Manson and F. B. Hu.** A prospective study of pregravid physical activity and sedentary behaviors in relation to the risk for gestational diabetes mellitus. *Arch.Intern.Med.* 2006. 166:543-548 |
| **Catherine Kim, Phyllis Brawarsky, Rebecca A. Jackson, Elena Fuentes-Afflick and Jennifer S. Haas.** Changes in health status experienced by women with gestational diabetes and pregnancy-induced hypertensive disorders. 2005. 14:729-736 |
| **Ch Estel and W. Turk.** The influence of a defined physical exercise during pregnancy on the functional values of the maternal cardiovascular system and on fetal heart rate. *Zentralbl.Gynakol.* 1987. 109:929-935 |
| **Cheryl Vamos, Sara Flory, Haichun Sun, et al.** Do Physical Activity Patterns Across the Lifecourse Impact Birth Outcomes?. *Maternal & Child Health Journal.* 2015. 19:1775-1782 8p |
| **Christopher P. Connolly.** Leisure-time physical activity perceptions, influences, and behavior during pregnancy. 2015. 75:No Pagination Specified |
| **Colleen Doyle, Elizabeth Werner, Tianshu Feng, et al.** Pregnancy distress gets under fetal skin: Maternal ambulatory assessment & sex differences in prenatal development. *Dev.Psychobiol.* 2015. 57:607-625 |
| **Corinne Urech, Nadine S. Fink, Irene Hoesli, Frank H. Wilhelm, Johannes Bitzer and Judith Alder.** Effects of relaxation on psychobiological wellbeing during pregnancy: A randomized controlled trial. 2010. 35:1348-1355 |
| **Cuilin Zhang, Deirdre K. Tobias, Jorge E. Chavarro, et al.** Adherence to healthy lifestyle and risk of gestational diabetes mellitus: Prospective cohort study. *BMJ: British Medical Journal Vol 349 Sep 2014, ArtID g5450.* 2014. 349: |
| **Curt L. Lox and Darren C. Treasure.** Changes in feeling states following aquatic exercise during pregnancy. 2000. 30:518-517 |
| **D. C. Pinzon, K. Zamora, J. H. Martinez, et al.** Type of delivery and gestational age is not affected by pregnant Latin-American women engaging in vigorous exercise: a secondary analysis of data from a controlled randomized trial. *Revista de Salud Publica.* 2012. 14:731-743 |
| **D. Cannella, M. Lobel and A. Monheit.** Knowing is believing: information and attitudes towards physical activity during pregnancy. 2010. 31:236-242 |
| **D. Da Costa, N. Rippen, M. Dritsa and A. Ring.** Self-reported leisure-time physical activity during pregnancy and relationship to psychological well-being. *Journal of Psychosomatic Obstetrics and Gynecology.* 2003. 24:111-119 |
| **D. Duncombe, H. Skouteris, E. H. Wertheim, L. Kelly, V. Fraser and S. J. Paxton.** Vigorous exercise and birth outcomes in a sample of recreational exercisers: a prospective study across pregnancy. *Aust.N.Z.J.Obstet.Gynaecol.* 2006. 46:288-292 |
| **D. E. Irwin, D. A. Savitz, K. A. St Andre and I. Hertz-Picciotto.** Study of occupational risk factors for pregnancy-induced hypertension among active duty enlisted Navy personnel. 1994. 25:349-359 |
| **D. Hruba, L. Kukla and M. Tyrlik.** Occupational risks for human reproduction: ELSPAC Study. European Longitudinal Study of Pregnancy and Childhood. *Cent.Eur.J.Public Health.* 1999. 7:210-215 |
| **D. J. Taylor, C. H. Thompson, G. J. Kemp, et al.** A relationship between impaired fetal growth and reduced muscle glycolysis revealed by 31P magnetic resonance spectroscopy. *Diabetologia.* 1995. 38:1205-1212 |
| **D. Jensen and D. E. O'Donnell.** The impact of human pregnancy on perceptual responses to chemoreflex vs. exercise stimulation of ventilation: a retrospective analysis. 2011. 175:55-61 |
| **D. Jensen, K. A. Webb and D. E. O'Donnell.** The increased ventilatory response to exercise in pregnancy reflects alterations in the respiratory control systems ventilatory recruitment threshold for CO2. 2010. 171:75-82 |
| **D. Jensen, K. A. Webb, G. A. Davies and D. E. O'Donnell.** Mechanical ventilatory constraints during incremental cycle exercise in human pregnancy: implications for respiratory sensation. 2008. 586:4735-4750 |
| **D. Jensen, K. A. Webb, G. A. Davies and D. E. O'Donnell.** Mechanisms of activity-related breathlessness in healthy human pregnancy. 2009. 106:253-265 |
| **D. Jensen, K. A. Webb, L. A. Wolfe and D. E. O'Donnell.** Effects of human pregnancy and advancing gestation on respiratory discomfort during exercise. *Respiratory Physiology and Neurobiology.* 2007. 156:85-93 |
| **D. Koniakgriffin.** Aerobic exercise, psychological well-being, and physical discomforts during adolescent pregnancy. *Res.Nurs.Health.* 1994. 17:253-263 |
| **D. L. Barnes, L. S. Adair and B. M. Popkin.** Source: PIP. 066229 Source: POP. 00203051; Women's physical activity and pregnancy outcome: a longitudinal analysis from the Philippines. *Int.J.Epidemiol.* 1991. 20:162-172 |
| **D. L. Barnes, L. S. Adair and B. M. Popkin.** Women's physical activity and pregnancy outcome: A longitudinal analysis from the Philippines. *Int.J.Epidemiol.* 1991. 20:162-172 |
| **D. Mparmpakas, A. Goumenou, E. Zachariades, G. Pados, Y. Gidron and E. Karteris.** Immune system function, stress, exercise and nutrition profile can affect pregnancy outcome: Lessons from a Mediterranean cohort. 2013. 5:411-418 |
| **D. P. Misra, D. M. Strobino, E. E. Stashinko, D. A. Nagey and J. Nanda.** Effects of physical activity on preterm birth. *Am.J.Epidemiol.* 1998. 147:628-635 |
| **D. R. Di Fabio, C. K. Blomme, K. M. Smith, G. J. Welk and C. G. Campbell.** Adherence to physical activity guidelines in mid-pregnancy does not reduce sedentary time: an observational study. 2015. 12:27 |
| **D. R. Hollingsworth and T. R. Moore.** Postprandial walking exercise in pregnant insulin-dependent (type I) diabetic women: reduction of plasma lipid levels but absence of a significant effect on glycemic control. *American Journal of Obstetrics & Gynecology.* 1987. 157:1359-1363 |
| **D. S. Downs and H. A. Hausenblas.** Pregnant women's third trimester exercise behaviors, body mass index, and pregnancy outcomes. *Psychol.Health.* 2007. 22:545-559 15p |
| **D. S. Downs, G. C. LeMasurier and J. M. DiNallo.** Baby Steps: Pedometer-Determined and Self-Reported Leisure-Time Exercise Behaviors of Pregnant Women. *Journal of Physical Activity & Health.* 2009. 6:63-72 |
| **D. Simmons, J. G. Jelsma, S. Galjaard, et al.** Results From a European Multicenter Randomized Trial of Physical Activity and/or Healthy Eating to Reduce the Risk of Gestational Diabetes Mellitus: The DALI Lifestyle Pilot. 2015. 38:1650-1656 |
| **D. Symons Downs and J. S. Ulbrecht.** Understanding exercise beliefs and behaviors in women with gestational diabetes mellitus. 2006. 29:236-240 |
| **Danielle A. J. M. Schoenaker, Sabita S. Soedamah-Muthu, Leonie K. Callaway and Gita D. Mishra.** Prepregnancy dietary patterns and risk of developing hypertensive disorders of pregnancy: results from the Australian Longitudinal Study on Women's Health. 2015. 102:94-101 8 |
| **de Viñaspre Hernández, Regina Ruiz, Encarnación Rubio Aranda and Concepción Tomás Aznar.** Urinary incontinence and weight changes during pregnancy and post partum: A pending challenge. 2013. 29:e123-9 1 |
| **Debbie M. Smith, Christine Ward, Shareen Forbes, Rebecca M. Reynolds and Fiona C. Denison.** Weight Management Guides for Pregnant Women with a Body Mass index (BMI) Greater than or Equal to 40kg/m[Superscript 2]: A Qualitative Exploration of Their Use in Maternity Care. 2013. 72:216-221 |
| **Deirdre Dlugonski and Robert W. Motl.** Marital status and motherhood: Implications for physical activity. *Women Health.* 2013. 53:203-215 |
| **Denise Maher.** Exercise and Weight Management for the Pregnant Amputee. 2006. 15:24-24 |
| **der Ploeg van, M. N. van Poppel, T. Chey, et al.** The role of pre-pregnancy physical activity and sedentary behaviour in the development of gestational diabetes mellitus. *Journal of Science & Medicine in Sport.* 2011. 14:149-152 4p |
| **der Wijden van, de Waal Delemarre-van, W. van Mechelen and M. N. van Poppel.** The relationship between moderate-to-vigorous intensity physical activity and insulin resistance, insulin-like growth factor (IGF-1)-system 1, leptin and weight change in healthy women during pregnancy and after delivery. *Clin.Endocrinol.(Oxf).* 2015. 82:68-75 |
| **Dominguez De Costa, Eisenberg De Smoler, J. Armas Dominguez and S. Karchmer.** Exercise tests, heart rate and changes in the mother's position. 1977. 42:11-19 |
| **E. A. Beyaz, E. Ozcan, A. Ketenci and M. M. Beyaz.** The effectiveness of pregnancy rehabilitation: Effects on low back pain and calf cramps during pregnancy and pregnancy outcome. 2011. 7:67-74 |
| **E. A. Morris, C. A. McBride, G. J. Badger and I. M. Bernstein.** Prepregnancy blood pressure and history of first trimester loss contribute to birth weight and placental weight. *Reproductive Sciences.* 2015. 22:185A-186A |
| **E. Althuizen, van der Wijden, C. L., W. van Mechelen, J. C. Seidell and M. N. van Poppel.** The effect of a counselling intervention on weight changes during and after pregnancy: a randomised trial. 2013. 120:92-99 |
| **E. Althuizen, van Poppel, M. N. M., J. C. Seidell and W. van Mechelen.** Correlates of absolute and excessive weight gain during pregnancy. 2009. 18:1559-1566 8 |
| **E. E. Krans and J. C. Chang.** Low-income African American women's beliefs regarding exercise during pregnancy. 2012. 16:1180-1187 |
| **E. F. Magann, S. F. Evans and J. P. Newnham.** Employment, exertion, and pregnancy outcome: assessment by kilocalories expended each day. *American Journal of Obstetrics & Gynecology.* 1996. 175:182-187 |
| **E. F. Magann, S. F. Evans, B. Weitz and J. Newnham.** Antepartum, intrapartum, and neonatal significance of exercise on healthy low-risk pregnant working women. *Obstetrics & Gynecology.* 2002. 99:466-472 |
| **E. Forsum, N. Kabir, A. Sadurskis and K. Westerterp.** Total energy expenditure of healthy Swedish women during pregnancy and lactation. 1992. 56:334-342 |
| **E. Golomer, D. Ducher, G. S. Arfi and R. Sud.** A study of pregnant women while walking and while carrying a weight. French]. *J.Gynecol.Obstet.Biol.Reprod.* 1991. 20:406-412 |
| **E. Ha, S. I. Cho, H. Park, et al.** Does standing at work during pregnancy result in reduced infant birth weight?. *Journal of Occupational & Environmental Medicine.* 2002. 44:815-821 |
| **E. Haelterman, S. Marcoux, A. Croteau and M. Dramaix.** Population-based study on occupational risk factors for preeclampsia and gestational hypertension. *Scandinavian Journal of Work, Environment and Health.* 2007. 33:304-317 |
| **E. Heery, A. McConnon, C. C. Kelleher, P. G. Wall and F. M. McAuliffe.** PMC3827496; Perspectives on weight gain and lifestyle practices during pregnancy among women with a history of macrosomia: a qualitative study in the Republic of Ireland. *BMC Pregnancy & Childbirth.* 2013. 13:202 |
| **E. I. Florack, A. E. Pellegrino, G. A. Zielhuis and R. Rolland.** Influence of occupational physical activity on pregnancy duration and birthweight. *Scand.J.Work Environ.Health.* 1995. 21:199-207 |
| **E. I. M. Florack, G. A. Zielhuis, J. E. M. C. Pellegrino and R. Rolland.** Occupational physical activity and the occurrence of spontaneous abortion. *Int.J.Epidemiol.* 1993. 22:878-884 |
| **E. J. Crenier and Y. Lambert.** [Influence of pre- and postnatal exercises on the abdominal wall]. 1975. 4:551-556 |
| **E. K. Rousham, P. E. Clarke and H. Gross.** Significant changes in physical activity among pregnant women in the UK as assessed by accelerometry and self-reported activity. *Eur.J.Clin.Nutr.* 2006. 60:393-400 |
| **E. Korpi-Hyovalti, S. Heinonen, U. Schwab, D. E. Laaksonen and L. Niskanen.** Effect of intensive counselling on physical activity in pregnant women at high risk for gestational diabetes mellitus. A clinical study in primary care. *Primary care diabetes.* 2012. 6:261-268 |
| **E. L. LeMoyne, D. Curnier and D. Ellemberg.** Pregnancy and cognition: deficits in inhibition are unrelated to changes in fitness. *Journal of clinical and experimental neuropsychology.* 2014. 36:178-185 |
| **E. L. Rauff and D. S. Downs.** Mediating effects of body image satisfaction on exercise behavior, depressive symptoms, and gestational weight gain in pregnancy. 2011. 42:381-390 |
| **E. M. Alfadhli, E. N. Osman, T. H. Basri, et al.** Gestational diabetes among Saudi women: prevalence, risk factors and pregnancy outcomes. *Annals of Saudi Medicine.* 2015. 35:222-230 |
| **E. M. Ekholm, S. J. Piha, R. U. Erkkola and K. J. Antila.** Autonomic cardiovascular reflexes in pregnancy. A longitudinal study. *Clinical Autonomic Research.* 1994. 4:161-165 |
| **E. Mocevic, S. W. Svendsen, K. T. Joorgensen, P. Frost and J. P. Bonde.** Occupational lifting, fetal death and preterm birth: Findings from the Danish National Birth Cohort using a job exposure matrix. *PLoS ONE.* 2014. 9: |
| **E. Nethery, M. Brauer and P. Janssen.** Time-activity patterns of pregnant women and changes during the course of pregnancy. 2009. 19:317-324 |
| **E. O. Im, W. Chee, H. J. Lim, Y. Liu and H. K. Kim.** Midlife women's attitudes toward physical activity. *JOGNN - Journal of Obstetric, Gynecologic, and Neonatal Nursing.* 2008. 37:203-213 |
| **E. Oken, Y. Ning, S. L. Rifas-Shiman, J. S. Radesky, J. W. Rich-Edwards and M. W. Gillman.** Associations of physical activity and inactivity before and during pregnancy with glucose tolerance. 2006. 108:1200-1207 |
| **E. P. Durak, L. Jovanovic-Peterson and C. M. Peterson.** Comparative evaluation of uterine response to exercise on five aerobic machines. 1990. 162:754-756 |
| **E. Petrella, M. Malavolti, V. Bertarini, et al.** Gestational weight gain in overweight and obese women enrolled in a healthy lifestyle and eating habits program. *Journal of Maternal-Fetal & Neonatal Medicine.* 2014. 27:1348-1352 |
| **E. Petridou, H. Salvanos, A. Skalkidou, N. Dessypris, M. Moustaki and D. Trichopoulos.** Are there common triggers of preterm deliveries?. 2001. 108:598-604 |
| **E. Rutkowska and C. Lepecka-Klusek.** The role of physical activity in preparing women for pregnancy and delivery in Poland. 2002. 23:919-923 |
| **E. S. Ji and H. R. Han.** The effects of Qi exercise on maternal/fetal interaction and maternal well-being during pregnancy. *JOGNN - Journal of Obstetric, Gynecologic, & Neonatal Nursing.* 2010. 39:310-318 |
| **E. S. Lindholm, M. Norman, C. P. Kilander and D. Altman.** Weight control program for obese pregnant women. *Acta Obstet.Gynecol.Scand.* 2010. 89:840-843 |
| **E. T. Reilly, R. M. Freeman, M. R. Waterfield, A. E. Waterfield, P. Steggles and F. Pedlar.** Prevention of postpartum stress incontinence in primigravidae with increased bladder neck mobility: a randomised controlled trial of antenatal pelvic floor exercises. 2014. 121 Suppl 7:58-66 |
| **E. Thorell and P. Kristiansson.** Pregnancy related back pain, is it related to aerobic fitness? A longitudinal cohort study. 2012. 12:30 |
| **E. Thorell, K. Svardsudd, K. Andersson and P. Kristiansson.** Moderate impact of full-term pregnancy on estimated peak oxygen uptake, physical activity and perceived health. *Acta Obstet.Gynecol.Scand.* 2014. 89:1140-1148 |
| **E. Thorell, L. Goldsmith, G. Weiss and P. Kristiansson.** Physical fitness, serum relaxin and duration of gestation. 2015. 15:168 |
| **E. Tlapáková, K. Jelen and M. Minař**. The relationship between pelvis inclination, exercise and low back pain (LBP) during pregnancy. 2011. 41:15-21 |
| **E. V. Bennett, C. E. McEwen, L. H. Clarke, K. A. Tamminen and P. R. E. Crocker.** 'It's all about modifying your expectations': Women's experiences with physical activity during pregnancy. 2013. 5:267-286 |
| **E. V. Espel, L. M. Glynn, C. A. Sandman and E. P. Davis.** PMC4244187; Longer gestation among children born full term influences cognitive and motor development. *PLoS ONE Electronic Resource].* 2014. 9:e113758 |
| **E. V. Tyldum, P. R. Romundstad and S. A. Slordahl.** Pre-pregnancy physical activity and preeclampsia risk: a prospective population-based cohort study. *Acta Obstet.Gynecol.Scand.* 2010. 89:315-320 |
| **E. W. Reid, J. A. McNeill, F. A. Alderdice, M. A. Tully and V. A. Holmes.** Physical activity, sedentary behaviour and fetal macrosomia in uncomplicated pregnancies: a prospective cohort study. *Midwifery.* 2014. 30:1202-1209 |
| **E. Weallens, A. Clark, P. MacIntyre and M. Gaudoin.** A survey of exercise patterns in primigravidae at a Scottish NHS trust: More consistent support and advice required for women and their families. *Health Educ.J.* 2003. 62:234-245 |
| **E. Wergeland, K. Strand and P. E. Bordahl.** Strenuous working conditions and birthweight, Norway 1989. *Acta Obstet.Gynecol.Scand.* 1998. 77:263-271 |
| **E. White, J. Pivarnik and K. Pfeiffer.** Resistance training during pregnancy and perinatal outcomes. *Journal of Physical Activity & Health.* 2014. 11:1141-1148 |
| **E. Y. Wong, R. Ray, D. L. Gao, et al.** Physical activity, physical exertion, and miscarriage risk in Women textile Workers in Shanghai, china. *Am.J.Ind.Med.* 2010. 53:497-505 |
| **E. Zaharieva.** Olympic participation by women. Effects on pregnancy and childbirth. *JAMA.* 1972. 221:992-995 |
| **El Metwalli, A. G. A., A. M. Badawy, L. A. El Baghdadi and A. El Wehady.** Occupational physical activity and pregnancy outcome. *European Journal of Obstetrics Gynecology and Reproductive Biology.* 2001. 100:41-45 |
| **Elaine S. Marshall, Bridget Melton, Helen Bland and Jacquelyn Nagle.** Physical Activity and Muscular Strengthening in Pregnancy: A Rural Urban Comparison. 2013. 13:50-65 16 |
| **Eman Mohammed Alfadhli, Eman Naguib Osman, Taghreed Hamza Basri, et al.** Gestational diabetes among Saudi women: prevalence, risk factors and pregnancy outcomes. *Annals of Saudi Medicine.* 2015. 35:222-230 |
| **Erica P. Gunderson, Charles P. Quesenberry Jr., Cora E. Lewis, et al.** Development of Overweight Associated with Childbearing Depends on Smoking Habit: The Coronary Artery Risk Development in Young Adults (CARDIA) Study. 2004. 12:2041-2053 |
| **F. Aliaga-Martinez, E. Prats-Ribera, M. Alsina-Hlipolito and A. Allepuz-Palau.** Impact on the function of the pelvic floor muscles of a specific training program included in the routine monitoring of pregnancy and postpartum non-randomized controlled trial. Spanish]. *Matronas Profesion.* 2013. 14:36-44 |
| **F. Doran and A. P. O'Brien.** A brief report of attitudes towards physical activity during pregnancy. *Health Promotion Journal of Australia.* 2007. 18:155-158 |
| **F. Doran and K. Davis.** Factors that influence physical activity for pregnant and postpartum women and implications for primary care. *Australian Journal of Primary Health.* 2011. 17:79-85 |
| **F. Doran.** Gestational diabetes mellitus: Perspectives on lifestyle changes during pregnancy and post-partum, physical activity and the prevention of future type 2 diabetes. 2008. 14:85-92 |
| **F. Ebrahimi, Z. M. Shariff, S. Z. Tabatabaei, M. S. Fathollahi, C. Y. Mun and M. Nazari.** Relationship between sociodemographics, dietary intake, and physical activity with gestational weight gain among pregnant women in Rafsanjan City, Iran. 2015. 33:168-176 |
| **F. K. Lotgering, A. van den Berg, P. C. Struijk and H. C. Wallenburg.** Arterial pressure response to maximal isometric exercise in pregnant women. 1992. 166:538-542 |
| **F. K. Lotgering, M. B. van Doorn, P. C. Struijk, J. Pool and H. C. Wallenburg.** Maximal aerobic exercise in pregnant women: heart rate, O2 consumption, CO2 production, and ventilation. 1991. 70:1016-1023 |
| **F. K. Lotgering, P. C. Struijk, M. B. van Doorn, W. E. Spinnewijn and H. C. Wallenburg.** Anaerobic threshold and respiratory compensation in pregnant women. 1995. 78:1772-1777 |
| **F. M. Doran and N. A. Buckley.** Walking patterns in pregnancy. *Australian Journal of Primary Health.* 2013. 19:213-218 |
| **F. M. Kovacs, E. Garcia, A. Royuela, L. Gonzalez, V. Abraira and Spanish Back Pain Research, Network.** Prevalence and factors associated with low back pain and pelvic girdle pain during pregnancy: a multicenter study conducted in the Spanish National Health Service. 2012. 37:1516-1533 |
| **F. Mohammadi, J. Malakooti, J. Babapoor and S. Mohammad-Alizadeh-Charandabi.** The effect of a home-based exercise intervention on postnatal depression and fatigue: A randomized controlled trial. 2015. 21:478-485 |
| **F. Momeni Javid, M. Simbar, M. Dolatian and H. Alavi Majd.** Comparison of lifestyles of women with gestational diabetes and healthy pregnant women. *Global Journal of Health Science.* 2015. 7:162-169 |
| **F. Nasiri-Amiri, A. Bakhtiari, M. Faramarzi, H. Adib Rad and H. Pasha.** The Association Between Physical Activity During Pregnancy and Gestational Diabetes Mellitus: A Case-Control Study. *International Journal of Endocrinology and Metabolism.* 2016. 14:e37123 |
| **F. O. Omokhodion, M. O. Onadeko, O. A. Roberts, J. R. Beach, I. Burstyn and N. M. Cherry.** Paid work, domestic work, and other determinants of pregnancy outcome in Ibadan, southwest Nigeria. *International Journal of Gynaecology & Obstetrics.* 2010. 111:165-170 |
| **F. P. McCarthy, A. S. Khashan, D. Murray, et al.** Parental physical and lifestyle factors and their association with newborn body composition. *BJOG: An International Journal of Obstetrics and Gynaecology.* 2016. 123:1824-1829 |
| **F. Sehati Shafayi, M. Akef, H. Sadegi and A. Sallakh Niknazhad.** PMC3825354; A Comparison of Physical Activity and Nutritional Practices in Hypertensive and Non- hypertensive Pregnant Women. *Journal of Cardiovascular & Thoracic Research.* 2012. 4:53-56 |
| **F. Shobeiri and K. Begum.** Physical activity and pregnancy outcome among Indian women belonging to high socioeconomic families. *Journal of Postgraduate Medical Institute.* 2005. 19:125-129 |
| **Fahimeh Sehati Shafayi, Maryam Akef, Homayoon Sadegi and Akram sallakh Niknazhad.** A Comparison of Physical Activity and Nutritional Practices in Hypertensive and Non- hypertensive Pregnant Women. 2012. 4:53-56 4 |
| **Fernandes da Mota, P. G., A. G. Pascoal, A. I. Carita and K. Bo.** Prevalence and risk factors of diastasis recti abdominis from late pregnancy to 6 months postpartum, and relationship with lumbo-pelvic pain. 2015. 20:200-205 |
| **G. A. Dumas, J. G. Reid, L. A. Wolfe, M. P. Griffin and M. J. McGrath.** Exercise, posture, and back pain during pregnancy. Part 1. Exercise and posture. 1995. 10:98-103 |
| **G. A. Dumas, J. G. Reid, L. A. Wolfe, M. P. Griffin and M. J. McGrath.** Exercise, posture, and back pain during pregnancy. Part 2. Exercise and back pain. 1995. 10:104-109 |
| **G. Ahlborg Jr.** Physical work load and pregnancy outcome. 1995. 37:941-944 |
| **G. C. Di Renzo, I. Giardina, A. Rosati, et al.** Maternal risk factors for preterm birth: a country-based population analysis. *European Journal of Obstetrics, Gynecology, & Reproductive Biology.* 2011. 159:342-346 |
| **G. Candido, T. Lo and P. A. Janssen.** Risk factors for diastasis of the recti abdominis. 2005. 49-54 6 |
| **G. Cito, S. Luisi, A. Mezzesimi, C. Cavicchioli, G. Calonaci and F. Petraglia.** Maternal position during non-stress test and fetal heart rate patterns. 2005. 84:335-338 |
| **G. Cuco, V. Arija, R. Iranzo, J. Vila, M. T. Prieto and J. Fernandez-Ballart.** Association of maternal protein intake before conception and throughout pregnancy with birth weight. 2006. 85:413-421 |
| **G. Eriksen, M. Wohlert, V. Ersbak, L. Hvidman, M. Hedegaard and K. Skajaa.** Placental abruption. A case-control investigation. 1991. 98:448-452 |
| **G. Jans, L. Ameye, C. Matthys, et al.** Does lifestyle coaching affect diet and physical activity stage of change scores in obese pregnant women? Pilot observations from the European DALI project. *Obesity Facts.* 2014. 7:132 |
| **G. Laura, L. Gianfranco and G. Donatella.** Pelvic floor muscle training during pregnancy to prevent urinary pelvic floor dysfunctions. *Neurourol.Urodyn.* 2010. 29:64-65 |
| **G. Lee, S. Challenger, M. McNabb and M. Sheridan.** A randomised controlled trial on exercise in pregnancy. 1996. |
| **G. M. Dado, P. B. Dobrin and R. S. Mrkvicka.** Venous flow through coiled and noncoiled umbilical cords. Effects of external compression, twisting and longitudinal stretching. *J.Reprod.Med.* 1997. 42:576-580 |
| **G. M. Egeland, K. Klungsoyr, N. Oyen, G. S. Tell, O. Naess and R. Skjaerven.** Preconception cardiovascular risk factor differences between gestational hypertension and preeclampsia: Cohort Norway study. *Hypertension.* 2016. 67:1173-1180 |
| **G. N. Bedell and R. W. Adams.** Pulmonary Diffusing Capacity during Rest and Exercise. A Study of Normal Persons and Persons with Atrial Septal Defect, Pregnancy, and Pulmonary Disease. 1962. 41:1908-1914 |
| **G. N. Brankston, B. F. Mitchell, E. A. Ryan and N. B. Okun.** Resistance exercise decreases the need for insulin in overweight women with gestational diabetes mellitus. *American Journal of Obstetrics & Gynecology.* 2004. 190:188-193 |
| **G. Nagel, M. Wabitsch, C. Galm, et al.** Determinants of obesity in the Ulm Research on Metabolism, Exercise and Lifestyle in Children (URMEL-ICE). 2009. 168:1259-1267 |
| **G. Ramirez, R. M. Grimes, J. F. Annegers, B. R. Davis and C. H. Slater.** PMC1404715; Occupational physical activity and other risk factors for preterm birth among US Army primigravidas. *Am.J.Public Health.* 1990. 80:728-730 |
| **G. Risvas, I. Papaioannou, D. B. Panagiotakos, P. Farajian, V. Bountziouka and A. Zampelas.** Perinatal and family factors associated with preadolescence overweight/obesity in Greece: the GRECO study. 2012. 2:145-153 |
| **G. S. Berkowitz, J. L. Kelsey, T. R. Holford and R. L. Berkowitz.** Physical activity and the risk of spontaneous preterm delivery. *J.Reprod.Med.* 1983. 28:581-588 |
| **G. S. Berkowitz.** An epidemiologic study of preterm delivery. 1981. 113:81-92 |
| **G. Torres-Luque, L. Torres-Luque, S. Garc**. Seguimiento de un programa de actividad f. 2012. 11:84-92 |
| **G. Varrassi, C. Bazzano and W. T. Edwards.** Effects of physical activity on maternal plasma beta-endorphin levels and perception of labor pain. 1989. 160:707-712 |
| **G. Xu, Y. Wu, L. Yang, et al.** Risk factors for early miscarriage among Chinese: a hospital-based case-control study. *Fertility & Sterility.* 2014. 101:1663-1670 |
| **G. Zhao, E. S. Ford, J. Tsai, et al.** Trends in health-related behavioral risk factors among pregnant women in the United States: 2001-2009. 2012. 21:255-263 |
| **Gema Torres-Luque, Luc**. Empleo del poms durante un programa de actividad física en el medio acuático para mujeres embarazadas. / use of the poms during a physical activity program in aquatic environment for pregnant women. 2010. 10:37-45 |
| **Glasgow University of, Scottish Collaboration for Public Health, Research and Policy.** Mellow Bumps RCT - Antenatal Intervention for Vulnerable Women. 2013. |
| **Guglielmina Fantuzzi, Elena Righi and Gabriella Aggazzotti.** A Case-Control Study on Leisure Time Physical Activity (LTPA) during the Last Three Months of Pregnancy and Foetal Outcomes in Italy. *Health (1949-4998).* 2016. 8:133-143 11p |
| **H. A. Hausenblas, B. W. Brewer, J. L. Van Raalte, et al.** Development and evaluation of a multimedia CD-ROM for exercise during pregnancy and postpartum. 2008. 70:215-219 |
| **H. C. Ostgaard, G. Zetherstrom, E. Roos-Hansson and B. Svanberg.** Reduction of back and posterior pelvic pain in pregnancy. 1994. 19:894-900 |
| **H. Cramer, J. Frawley, A. Steel, et al.** Characteristics of women who practice yoga in different locations during pregnancy. 2015. 5:e008641 |
| **H. D. Junge.** Behavioral states and state related heart rate and motor activity patterns in the newborn infant and the fetus antepartum -- a comparative study. I. Technique, illustration of recordings, and general results. 1979. 7:85-107 |
| **H. D. Junge.** Behavioral states and state-related heart rate and motor activity patterns in the newborn infant and the fetus ante partum. A comparative study. III. Analysis of sleep state-related motor activity patterns. 1980. 10:239-246 |
| **H. Dahlstrom and K. Ihrman.** A clinical and physiological study of pregnancy in a material from northern Sweden. V. The results of work tests during and after pregnancy. 1960. 65:305-314 |
| **H. E. Harris, G. T. Ellison and S. Clement.** Do the psychosocial and behavioral changes that accompany motherhood influence the impact of pregnancy on long-term weight gain?. 1999. 20:65-79 |
| **H. Elden, H. Hagberg, M. F. Olsen, L. Ladfors and H. C. Ostgaard.** Regression of pelvic girdle pain after delivery: follow-up of a randomised single blind controlled trial with different treatment modalities. 2008. 87:201-208 |
| **H. Elden, H. Ostgaard, M. Fagevik-Olsen, L. Ladfors and H. Hagberg.** Treatment of pelvic girdle pain in pregnant women: adverse effects of standard treatment, acupuncture and stabilising exercises on the pregnancy, mother, delivery and the fetus/neonate. *BMC Complementary & Alternative Medicine.* 2008. 8:13p-13p 1p |
| **H. Elden, L. Ladfors, M. F. Olsen, H. C. Ostgaard and H. Hagberg.** Effects of acupuncture and stabilising exercises as adjunct to standard treatment in pregnant women with pelvic girdle pain: randomised single blind controlled trial. 2005. 330:761 |
| **H. G. Knuttgen and K. Emerson Jr.** Physiological response to pregnancy at rest and during exercise. *J.Appl.Physiol.* 1974. 36:549-553 |
| **H. H. Kim, A. Nava-Ocampo, S. K. Kim, et al.** Is prenatal childbirth preparation effective in decreasing adverse maternal and neonatal response to labor? A nested case-control study. *Acta Bio-Medica de l Ateneo Parmense.* 2008. 79:18-22 |
| **H. Hausenblas, D. S. Downs, P. Giacobbi, D. Tuccitto and B. Cook.** A multilevel examination of exercise intention and behavior during pregnancy. 2008. 66:2555-2561 |
| **H. Hausenblas, P. Giacobbi, B. Cook, R. Rhodes and A. Cruz.** Prospective examination of pregnant and nonpregnant women's physical activity beliefs and behaviours. *Journal of Reproductive and Infant Psychology.* 2011. 29:308-319 |
| **H. Jiang, X. Qian, M. Li, et al.** Can physical activity reduce excessive gestational weight gain? Findings from a Chinese urban pregnant women cohort study. *International Journal of Behavioral Nutrition and Physical Activity.* 2012. 9: |
| **H. K. Hegaard, B. Ottesen, M. Hedegaard, et al.** The association between leisure time physical activity in the year before pregnancy and pre-eclampsia. *Journal of Obstetrics & Gynaecology.* 2010. 30:21-24 |
| **H. K. Hegaard, K. Petersson, M. Hedegaard, et al.** Sports and leisure-time physical activity in pregnancy and birth weight: a population-based study. *Scand.J.Med.Sci.Sports.* 2010. 20:e96-102 |
| **H. K. Hegaard, M. Hedegaard, P. Damm, B. Ottesen, K. Petersson and T. B. Henriksen.** Leisure time physical activity is associated with a reduced risk of preterm delivery. *American Journal of Obstetrics & Gynecology.* 2008. 198:180.e1-180.e5 |
| **H. K. Hegaard, P. Damm, M. Hedegaard, et al.** Sports and leisure time physical activity during pregnancy in nulliparous women. *Maternal & Child Health Journal.* 2011. 15:806-813 |
| **H. Kahyaoglu Sut and P. Balkanli Kaplan.** Effect of pelvic floor muscle exercise on pelvic floor muscle activity and voiding functions during pregnancy and the postpartum period. *Neurourology & Urodynamics.* 2016. 35:417-422 |
| **H. Kirkegaard, H. Stovring, K. M. Rasmussen, B. Abrams, T. I. Sorensen and E. A. Nohr.** Maternal weight change from prepregnancy to 7 years postpartum--the influence of behavioral factors. 2015. 23:870-878 |
| **H. Klomp, R. F. Dyck and S. Sheppard.** Description and evaluation of a prenatal exercise program for urban aboriginal women. *Canadian Journal of Diabetes.* 2003. 27:231-238 |
| **H. Kobe, A. Nakai, T. Koshino and T. Araki.** Effect of regular maternal exercise on lipid peroxidation levels and antioxidant enzymatic activities before and after delivery. 2002. 69:542-548 |
| **H. M. Whitford, B. Alder and M. Jones.** A cross-sectional study of knowledge and practice of pelvic floor exercises during pregnancy and associated symptoms of stress urinary incontinence in North-East Scotland. 2007. 23:204-217 |
| **H. Medek, T. Halldorsson, I. Gunnarsdottir and R. T. Geirsson.** Physical activity of relatively high intensity in mid-pregnancy predicts lower glucose tolerance levels. *Acta Obstet.Gynecol.Scand.* 2016. 95:1055-1062 |
| **H. Mendieta Zeron, A. Garduno Alanis, P. Montserrat Nava Diaz, J. Guadalupe Santillan Benitez, De La Rosa and G. Conzuelo Rodriguez.** Low activity in pregnancy does not modify neither adiponectin nor leptin serum levels. 2013. 172:773-779 |
| **H. N. Soultanakis, R. Artal and R. A. Wiswell.** Prolonged exercise in pregnancy: glucose homeostasis, ventilatory and cardiovascular responses. *Semin.Perinatol.* 1996. 20:315-327 |
| **H. N. Winn, O. Hess, I. Goldstein, F. Wackers and J. C. Hobbins.** Fetal responses to maternal exercise: effect on fetal breathing and body movement. *Am.J.Perinatol.* 1994. 11:263-266 |
| **H. Prapavessis, S. De Jesus, T. Harper, et al.** The effects of acute exercise on tobacco cravings and withdrawal symptoms in temporary abstinent pregnant smokers. 2014. 39:703-708 |
| **H. R. Murphy, K. Kumareswaran, J. M. Allen, et al.** Closed loop insulin delivery protects against nocturnal hypoglycaemia after moderate physical activity in pregnant women with Type 1 diabetes. *Diabetic Med.* 2011. 28:18 |
| **H. Taskinen, P. Kyyronen and K. Hemminki.** PMC1060641; Effects of ultrasound, shortwaves, and physical exertion on pregnancy outcome in physiotherapists. *Journal of Epidemiology & Community Health.* 1990. 44:196-201 |
| **H. Volejnikova, K. Janku, M. Cernoch and J. Buzkova.** The influence of exercise on the course of confinement in pregnant woman with cardiopathies. Czech]. *Rehabilitacia.* 1984. 17:37-40 |
| **H. Y. Yong, Z. Mohd Shariff, S. J. Koo and N. S. Binti Sa'ari.** Pre-pregnancy body mass index, height and physical activity are associated with rate of gestational weight gain among Malaysian mothers. *Journal of Obstetrics & Gynaecology Research.* 2016. 26:26 |
| **Hao-Yuan Chang, Yeur-Hur Lai, Mark P. Jensen, et al.** Factors associated with low back pain changes during the third trimester of pregnancy. 2014. 70:1054-1064 11 |
| **Heather A. Hausenblas and Danielle Symons Downs.** Prospective Examination of Leisure-Time Exercise Behavior During Pregnancy. 2005. 17:240-246 |
| **Heather Jeffcoat.** Perinatal Wellness. Top 5 Pregnancy Exercises for Low Back Pain. 2011. 26:9-10 2 |
| **Helena Andrade Figueira, de Souza Vale, Rodrigo Gomes, Wilma Ferreira Guedes Rodrigues, Alan Andrade Figueira, Joana Andrade Figueira and Estélio Henrique Martin Dantas.** Pregnancy-Related Low Back Pain Relief after Maximum Static Flexibility Program. 2014. 6:2966-2972 7 |
| **Hora Soltani, Alexandra M. S. Duxbury, Madelynne A. Arden, Andy Dearden, Penny J. Furness and Carolyn Garland.** Maternal Obesity Management Using Mobile Technology: A Feasibility Study to Evaluate a Text Messaging Based Complex Intervention during Pregnancy. 2015. 2015:1-10 10 |
| **I. A. Santos, R. Stein, S. C. Fuchs, et al.** Aerobic exercise and submaximal functional capacity in overweight pregnant women: a randomized trial. *Obstetrics & Gynecology.* 2005. 106:243-249 |
| **I. Danielsen, C. Granstrom, D. Rytter, et al.** Does physical activity during pregnancy adversely influence markers of the metabolic syndrome in adult offspring? A prospective study over two decades. *Journal of Epidemiology & Community Health.* 2013. 67:648-654 |
| **I. Esteban-Cornejo, D. Martinez-Gomez, C. Tejero-Gonzalez, et al.** Maternal physical activity before and during the prenatal period and the offspring's academic performance in youth. The UP&DOWN study. *Journal of Maternal-Fetal & Neonatal Medicine.* 2016. 29:1414-1420 |
| **I. Finkelstein, A. C. Kanitz, R. Bgeginski, et al.** Comparison of the rating of perceived exertion and oxygen uptake during exercise between pregnant and non-pregnant women and between water and land-based exercises. *Revista Brasileira de Medicina do Esporte.* 2012. 18:13-16 |
| **I. Finkelstein, P. A. de Figueiredo, C. L. Alberton, R. Bgeginski, R. Stein and L. F. Kruel.** Cardiorespiratory responses during and after water exercise in pregnant and non-pregnant women. *Revista Brasileira de Ginecologia e Obstetricia.* 2011. 33:388-394 |
| **I. Finkelstein, R. Bgeginski, De Figueiredo, P. A. P., C. L. Alberton, R. Stein and L. F. M. Kruel.** Cardiorespiratory responses of pregnant women during different types of exercise on land and in water. Portuguese]. *Rev.Bras.Med.* 2009. 66:174-177 |
| **I. Giroux, S. D. Inglis, S. Lander, S. Gerrie and M. F. Mottola.** Dietary intake, weight gain, and birth outcomes of physically active pregnant women: a pilot study. *Applied Physiology, Nutrition, & Metabolism = Physiologie Appliquee, Nutrition et Metabolisme.* 2006. 31:483-489 |
| **I. Guelinckx, R. Devlieger, P. Mullie and G. Vansant.** Effect of lifestyle intervention on dietary habits, physical activity, and gestational weight gain in obese pregnant women: a randomized controlled trial. *Am.J.Clin.Nutr.* 2010. 91:373-380 |
| **I. Kantola, T. Kaila and R. Erkkola.** Acute exercise- and drug-induced potassium shifts during pregnancy. 1994. 208:88-90 |
| **I. Kawabata, A. Nakai, A. Sekiguchi, Y. Inoue and T. Takeshita.** The effect of regular exercise training during pregnancy on postpartum brachial-ankle pulse wave velocity, a measure of arterial stiffness. 2012. 11:489-494 |
| **I. M. Claesson, A. Josefsson, M. Cedergren, et al.** Consumer satisfaction with a weight-gain intervention programme for obese pregnant women. 2008. 24:163-167 |
| **I. M. Claesson, S. Klein, G. Sydsjö and A. Josefsson.** Physical activity and psychological well-being in obese pregnant and postpartum women attending a weight-gain restriction programme. *Midwifery.* 2014. 30:11-16 |
| **I. Marc, J. Plaisance, C. Rheaume, et al.** Correlates of maternal cardiorespiratory fitness in the early second trimester of pregnancy. *Canadian Journal of Diabetes.* 2011. 35 (2):181-182 |
| **I. N. McIntyre and N. A. Broadhurst.** Effective treatment of low back pain in pregnancy. 1996. 25:S65-7 1 |
| **I. Nygaard, T. Girts, N. H. Fultz, K. Kinchen, G. Pohl and B. Sternfeld.** Is urinary incontinence a barrier to exercise in women?. *Obstet.Gynecol.* 2005. 106:307-314 |
| **I. Raisanen, K. Salminen and T. Laatikainen.** Response of plasma immunoreactive beta-endorphin and corticotropin to isometric exercise in uncomplicated pregnancy and in pregnancy-induced hypertension. 1990. 35:119-124 |
| **I. Rauramo and M. Forss.** Effect of exercise on maternal hemodynamics and placental blood flow in healthy women. *Acta Obstet.Gynecol.Scand.* 1988. 67:21-25 |
| **I. Rauramo and M. Forss.** Effect of exercise on placental blood flow in pregnancies complicated by hypertension, diabetes or intrahepatic cholestasis. *Acta Obstet.Gynecol.Scand.* 1988. 67:15-20 |
| **I. Rauramo, B. Andersson, T. Laatikainen and J. Pettersson.** Stress hormones and placental steroids in physical exercise during pregnancy. *British Journal of Obstetrics & Gynaecology.* 1982. 89:921-925 |
| **I. Rauramo, K. Salminen and T. Laatikainen.** Release of beta-endorphin in response to physical exercise in non-pregnant and pregnant women. 1986. 65:609-612 |
| **I. Rauramo, S. Ilmonen, L. Viinikka and O. Ylikorkala.** Prostacyclin and thromboxane in pregnant and nonpregnant women in response to exercise. 1995. 85:1027-1030 |
| **I. Szeto, D. Ma, F. Liu, et al.** The prevalence of excess weight gain, imbalanced dietary intake, and physical inactivity among pregnant women in urban areas of China. *Obesity Reviews.* 2014. 15:179 |
| **I. Tendais, B. Figueiredo, J. Mota and A. Conde.** Physical activity, health-related quality of life and depression during pregnancy. 2011. 27:219-228 |
| **I. W. Aitken.** Determinants of low birthweight among the Mendi of Sierra Leone: implications for medical and socio-economic strategies. 1990. 33:103-109 |
| **Iii J. F. Clapp and W. Kiess.** Effects of pregnancy and exercise on concentrations of the metabolic markers tumor necrosis factor alpha and leptin. *Obstet.Gynecol.* 2000. 182:300-306 |
| **Iii J. F. Clapp, B. Lopez and R. Harcar-Sevcik.** Neonatal behavioral profile of the offspring of women who continued to exercise regularly throughout pregnancy. *Obstet.Gynecol.* 1999. 180:91-94 |
| **Iii J. F. Clapp, S. Schmidt, A. Paranjape and B. Lopez.** Maternal insulin-like growth factor-I levels (IGF-I) reflect placental mass and neonatal fat mass. *Obstet.Gynecol.* 2004. 190:730-736 |
| **Iii J. F. Clapp.** Diet, exercise, and fete-placental growth. 1997. 260:101-108 |
| **Iii J. F. Clapp.** Effect of dietary carbohydrate on the glucose and insulin response to mixed caloric intake and exercise in both nonpregnant and pregnant women. *Diabetes Care.* 1998. 21:B107-B112 |
| **J. A. Carvajal, A. M. Delpiano, M. A. Cuello and J. A. Poblete.** Mechanical stretch increases brain natriuretic peptide production and secretion in the human fetal membranes. *Reproductive Sciences.* 2013. 20:597-604 |
| **J. A. Daniel, C. E. Dikki and W. Ibrahim.** Aerobic dance exercise improves blood glucose level in pregnant women with gestational diabetes mellitus. *African Journal for Physical, Health Education, Recreation & Dance.* 2014. 20:273-281 |
| **J. A. Grisso, D. M. Main, G. Chiu, E. S. Synder and J. H. Holmes.** Effects of physical activity and life-style factors on uterine contraction frequency. *Am.J.Perinatol.* 1992. 9:489-492 |
| **J. A. Leiferman and K. R. Evenson.** The effect of regular leisure physical activity on birth outcomes. *Maternal & Child Health Journal.* 2003. 7:59-64 |
| **J. Bustamante, R. Ramirez-Velez, A. C. D. Aguilar, A. Czerniczyniec and S. Lores-Arnaiz.** Aerobic Exercise Training During Pregnancy Improves Mitochondrial Function In Human Placenta. *Med.Sci.Sports Exerc.* 2012. 44:746-746 |
| **J. C. Dempsey, C. L. Butler, T. K. Sorensen, et al.** A case-control study of maternal recreational physical activity and risk of gestational diabetes mellitus. *Diabetes Research & Clinical Practice.* 2004. 66:203-215 |
| **J. C. Dempsey, T. K. Sorensen, I. M. Lee, et al.** Recreational physical activity during and before pregnancy and risk of gestational diabetes mellitus. *Am.J.Epidemiol.* 2003. 157:S75-S75 |
| **J. C. Dempsey, T. K. Sorensen, M. A. Williams, et al.** Prospective study of gestational diabetes mellitus risk in relation to maternal recreational physical activity before and during pregnancy. *Am.J.Epidemiol.* 2004. 159:663-670 |
| **J. C. Eisenman, M. A. Sarzynski, J. Tucker and K. A. Heelan.** Maternal Prepregnancy Overweight and Offspring Fatness and Blood Pressure: Role of Physical Activity. *Pediatric Exercise Science.* 2010. 22:369-378 |
| **J. C. Jarrett 2 and W. N. Spellacy.** Jogging during pregnancy: an improved outcome?. *Obstetrics & Gynecology.* 1983. 61:705-709 |
| **J. C. Veille, D. W. Kitzman and A. E. Bacevice.** Effects of pregnancy on the electrocardiogram in healthy subjects during strenuous exercise. *Obstet.Gynecol.* 1996. 175:1360-1364 |
| **J. C. Veille, D. W. Kitzman, P. D. Millsaps and P. D. Kilgo.** Left ventricular diastolic filling response to stationary bicycle exercise during pregnancy and the postpartum period. 2001. 185:822-827 |
| **J. C. Veille, H. K. Hellerstein and A. E. Bacevice Jr.** Maternal left ventricular performance during bicycle exercise. 1992. 69:1506-1508 |
| **J. C. Veille, H. K. Hellerstein, B. Cherry and A. E. Bacevice Jr.** Effects of advancing pregnancy on left ventricular function during bicycle exercise. *Am.J.Cardiol.* 1994. 73:609-610 |
| **J. C. Young and J. L. Treadway.** The effect of prior exercise on oral glucose tolerance in late gestational women. *Eur.J.Appl.Physiol.Occup.Physiol.* 1992. 64:430-433 |
| **J. Choi, J. H. Lee, E. Vittinghoff and Y. Fukuoka.** NIHMS743852 Available on 05/01/17] PMC4826820 Available on 05/01/17]; mHealth Physical Activity Intervention: A Randomized Pilot Study in Physically Inactive Pregnant Women. *Maternal & Child Health Journal.* 2016. 20:1091-1101 |
| **J. Delaney.** Participation in sports and exercise during pregnancy. 1995. 10:8-9 2 |
| **J. Dotlic, M. Terzic, D. Babic, et al.** Influence of lifestyle habits and behaviours on quality of life during pregnancy. 2012. 6:3987-3994 |
| **J. E. Martin, A. J. Hure, L. Macdonald-Wicks, R. Smith and C. E. Collins.** Predictors of post-partum weight retention in a prospective longitudinal study. 2014. 10:496-509 |
| **J. Erneszt and L. Szanyi.** Experimentation for determination of the loading capacity of cardiopathic pregnant women with analysis of the carotid pulse curve during pregnancy]. *Minerva Ginecol.* 1972. 24:1-5 |
| **J. F. Clapp 3 and Clapp,James F.,,3rd.** Long-term outcome after exercising throughout pregnancy: fitness and cardiovascular risk. *American Journal of Obstetrics & Gynecology.* 2008. 199:489.e6 |
| **J. F. Clapp 3 and E. L. Capeless.** Neonatal morphometrics after endurance exercise during pregnancy. *American Journal of Obstetrics & Gynecology.* 1990. 163:1805-1811 |
| **J. F. Clapp 3 and E. L. Capeless.** The changing glycemic response to exercise during pregnancy. *American Journal of Obstetrics & Gynecology.* 1991. 165:1678-1683 |
| **J. F. Clapp 3 and K. H. Rizk.** Effect of recreational exercise on midtrimester placental growth. *American Journal of Obstetrics & Gynecology.* 1992. 167:1518-1521 |
| **J. F. Clapp 3 and S. Dickstein.** Endurance exercise and pregnancy outcome. *Medicine & Science in Sports & Exercise.* 1984. 16:556-562 |
| **J. F. Clapp 3, H. Kim, B. Burciu and B. Lopez.** Beginning regular exercise in early pregnancy: effect on fetoplacental growth. *American Journal of Obstetrics & Gynecology.* 2000. 183:1484-1488 |
| **J. F. Clapp 3, H. Kim, B. Burciu, S. Schmidt, K. Petry and B. Lopez.** Continuing regular exercise during pregnancy: effect of exercise volume on fetoplacental growth. *American Journal of Obstetrics & Gynecology.* 2002. 186:142-147 |
| **J. F. Clapp 3, K. D. Little and J. A. Widness.** Effect of maternal exercise and fetoplacental growth rate on serum erythropoietin concentrations. *American Journal of Obstetrics & Gynecology.* 2003. 188:1021-1025 |
| **J. F. Clapp 3, K. D. Little, S. Appleby-Wineberg and J. A. Widness.** The effect of regular maternal exercise on erythropoietin in cord blood and amniotic fluid. *American Journal of Obstetrics & Gynecology.* 1995. 172:1445-1451 |
| **J. F. Clapp 3, S. Simonian, B. Lopez, S. Appleby-Wineberg and R. Harcar-Sevcik.** The one-year morphometric and neurodevelopmental outcome of the offspring of women who continued to exercise regularly throughout pregnancy. *American Journal of Obstetrics & Gynecology.* 1998. 178:594-599 |
| **J. F. Clapp 3.** Morphometric and neurodevelopmental outcome at age five years of the offspring of women who continued to exercise regularly throughout pregnancy. *J.Pediatr.* 1996. 129:856-863 |
| **J. F. Clapp 3.** NIHMS91250 PMC2650435; Long-term outcome after exercising throughout pregnancy: fitness and cardiovascular risk. *American Journal of Obstetrics & Gynecology.* 2008. 199:489.e1-489.e6 |
| **J. F. Clapp 3.** Oxygen consumption during treadmill exercise before, during, and after pregnancy. *American Journal of Obstetrics & Gynecology.* 1989. 161:1458-1464 |
| **J. F. Clapp 3.** The changing thermal response to endurance exercise during pregnancy. *American Journal of Obstetrics & Gynecology.* 1991. 165:1684-1689 |
| **J. F. Clapp 3.** The course of labor after endurance exercise during pregnancy. *American Journal of Obstetrics & Gynecology.* 1990. 163:1799-1805 |
| **J. F. Clapp 3.** The effects of maternal exercise on early pregnancy outcome. *American Journal of Obstetrics & Gynecology.* 1989. 161:1453-1457 |
| **J. F. Clapp 3rd and E. Capeless.** The VO2max of recreational athletes before and after pregnancy. 1991. 23:1128-1133 |
| **J. F. Clapp 3rd and E. L. Capeless.** The changing glycemic response to exercise during pregnancy. 1991. 165:1678-1683 |
| **J. F. Clapp 3rd and K. H. Rizk.** Effect of recreational exercise on midtrimester placental growth. 1992. 167:1518-1521 |
| **J. F. Clapp 3rd and W. Kiess.** Effects of pregnancy and exercise on concentrations of the metabolic markers tumor necrosis factor alpha and leptin. 2000. 182:300-306 |
| **J. F. Clapp 3rd, K. D. Little and J. A. Widness.** Effect of maternal exercise and fetoplacental growth rate on serum erythropoietin concentrations. 2003. 188:1021-1025 |
| **J. F. Clapp 3rd, M. Wesley and R. H. Sleamaker.** Thermoregulatory and metabolic responses to jogging prior to and during pregnancy. 1987. 19:124-130 |
| **J. F. Clapp 3rd.** Effect of dietary carbohydrate on the glucose and insulin response to mixed caloric intake and exercise in both nonpregnant and pregnant women. 1998. 21 Suppl 2:B107-12 |
| **J. F. Clapp 3rd.** Long-term outcome after exercising throughout pregnancy: fitness and cardiovascular risk. 2008. 199:489.e1-489.e6 |
| **J. F. Clapp 3rd.** Maternal heart rate in pregnancy. 1985. 152:659-660 |
| **J. F. Clapp 3rd.** Morphometric and neurodevelopmental outcome at age five years of the offspring of women who continued to exercise regularly throughout pregnancy. 1996. 129:856-863 |
| **J. F. Clapp 3rd.** Oxygen consumption during treadmill exercise before, during, and after pregnancy. 1989. 161:1458-1464 |
| **J. F. Clapp 3rd.** The changing thermal response to endurance exercise during pregnancy. 1991. 165:1684-1689 |
| **J. F. Clapp 3rd.** The effects of maternal exercise on early pregnancy outcome. 1989. 161:1453-1457 |
| **J. F. Clapp and K. D. Little.** Effect of recreational exercise on pregnancy weight gain and subcutaneous fat deposition. *Med.Sci.Sports Exerc.* 1995. 27:170-177 |
| **J. F. Clapp Iii and B. Lopez.** Size at birth, obesity and blood pressure at age five. *Metabolic Syndrome & Related Disorders.* 2007. 5:116-126 |
| **J. F. Clapp, M. Wesley and R. H. Sleamaker.** Thermoregulatory and metabolic responses to jogging prior to and during pregnancy. / Reponses thermoregulatoires et metaboliques au jogging, avant et pendant la grossesse. *Medicine & Science in Sports & Exercise.* 1987. 19:124-130 |
| **J. G. Jelsma, K. M. van Leeuwen, N. Oostdam, et al.** PMC4738738; Beliefs, Barriers, and Preferences of European Overweight Women to Adopt a Healthier Lifestyle in Pregnancy to Minimize Risk of Developing Gestational Diabetes Mellitus: An Explorative Study. *Journal of Pregnancy.* 2016. 2016:3435791 |
| **J. G. Kemp, F. A. Greer and L. A. Wolfe.** Acid-base regulation after maximal exercise testing in late gestation. *J.Appl.Physiol.* 1997. 83:644-651 |
| **J. G. Logan and S. Yeo.** Effects of Stretching Exercise on Heart Rate Variability During Pregnancy. *J.Cardiovasc.Nurs.* 2016. 2:2 |
| **J. Gofin.** The effect on birth weight of employment during pregnancy. *J.Biosoc.Sci.* 1979. 11:259-267 |
| **J. Goy, L. Dodds, M. W. Rosenberg and W. D. King.** Health-risk behaviours: examining social disparities in the occurrence of stillbirth. 2008. 22:314-320 |
| **J. H. Kim, R. J. Roberge and J. B. Powell.** PMC4357216; Effect of external airflow resistive load on postural and exercise-associated cardiovascular and pulmonary responses in pregnancy: a case control study. *BMC Pregnancy & Childbirth.* 2015. 15:45 |
| **J. H. Liu, E. Mayer-Davis, R. R. Pate, A. E. Gallagher and J. L. Bacon.** Physical activity during pregnancy is associated with reduced fasting insulin-the Pilot Pregnancy and Active Living Study. *Journal of Maternal-Fetal and Neonatal Medicine.* 2010. 23:1249-1252 |
| **J. Huberty, D. Dinkel, M. W. Beets and J. Coleman.** Describing the use of the internet for health, physical activity, and nutrition information in pregnant women. 2013. 17:1363-1372 |
| **J. J. Newham, A. Wittkowski, J. Hurley, J. D. Aplin and M. Westwood.** Effects of antenatal yoga on maternal anxiety and depression: a randomized controlled trial. *Depress.Anxiety.* 2014. 31:631-640 |
| **J. J. Newham, C. Allan, P. Leahy-Warren, D. Carrick-Sen and F. Alderdice.** Intentions Toward Physical Activity and Resting Behavior in Pregnant Women: Using the Theory of Planned Behavior Framework in a Cross-Sectional Study. *Birth.* 2016. 43:49-57 |
| **J. J. Pomerance, L. Gluck and V. A. Lynch.** Physical fitness in pregnancy: its effect on pregnancy outcome. *American Journal of Obstetrics & Gynecology.* 1974. 119:867-876 |
| **J. Jurewicz, W. Hanke, T. Makowiec-Dabrowska and J. Kalinka.** Heaviness of the work measured by energy expenditure during pregnancy and its effect on birth weight]. *Ginekol.Pol.* 2006. 77:537-542 |
| **J. Kluge, D. Hall, Q. Louw, G. Theron and D. Grove.** Specific exercises to treat pregnancy-related low back pain in a South African population. 2011. 113:187-191 |
| **J. L. Ersek and L. R. Brunner Huber.** Physical activity prior to and during pregnancy and risk of postpartum depressive symptoms. 2009. 38:556-566 |
| **J. L. Huberty, M. P. Buman, J. A. Leiferman, J. Bushar and M. A. Adams.** PMC4929212; Trajectories of objectively-measured physical activity and sedentary time over the course of pregnancy in women self-identified as inactive. *Preventive Medicine Reports.* 2016. 3:353-360 |
| **J. L. Kraschnewski, C. H. Chuang, D. S. Downs, et al.** NIHMS494513 PMC3742311; Association of prenatal physical activity and gestational weight gain: results from the first baby study. *Womens Health Issues.* 2013. 23:e233-8 |
| **J. Langhoff-Roos, G. Lindmark, E. Kylberg and M. Gebre-Medhin.** Energy intake and physical activity during pregnancy in relation to maternal fat accretion and infant birthweight. *British Journal of Obstetrics & Gynaecology.* 1987. 94:1178-1185 |
| **J. Langhoff-Roos, G. Lindmark, E. Kylberg and M. Gebre-Medhin.** Energy intake and physical activity during pregnancy in relation to maternal fat accretion and infant birthweight. *Br.J.Obstet.Gynaecol.* 1987. 94:1178-1185 |
| **J. Leiferman, T. Swibas, K. Koiness, J. A. Marshall and A. L. Dunn.** My baby, my move: examination of perceived barriers and motivating factors related to antenatal physical activity. 2011. 56:33-40 |
| **J. Leng, G. Liu, C. Zhang, et al.** Physical activity, sedentary behaviors and risk of gestational diabetes mellitus: a population-based cross-sectional study in Tianjin, China. *European Journal of Endocrinology.* 2016. 174:763-773 |
| **J. Liu, J. N. Laditka, E. Mayer-Davis and R. R. Pate.** Does physical activity during pregnancy reduce the risk of gestational diabetes among previously inactive women?. *Birth.* 2008. 35:188-195 |
| **J. Liu, J. N. Laditka, E. Mayer-Davis and R. R. Pate.** Physical activity during pregnancy may reduce risk of gestational diabetes among previously inactive women. *Diabetes.* 2006. 55:A418-A418 |
| **J. Liu, S. N. Blair, Y. Teng, A. R. Ness, D. A. Lawlor and C. Riddoch.** Physical activity during pregnancy in a prospective cohort of British women: results from the Avon longitudinal study of parents and children. 2011. 26:237-247 |
| **J. Lutter.** Fetal outcome of women who ran while pregnant: a preliminary report. *Melpomene Report.* 1984. 3:6-8 |
| **J. M. Catov, R. B. Ness, M. F. Wellons, D. R. Jacobs, J. M. Roberts and E. P. Gunderson.** Prepregnancy lipids related to preterm birth risk: the coronary artery risk development in young adults study. 2010. 95:3711-3718 |
| **J. M. DiNallo, D. S. Downs and G. Le Masurier.** Objectively assessing treadmill walking during the second and third pregnancy trimesters. *Journal of Physical Activity & Health.* 2012. 9:21-28 |
| **J. M. DiNallo, G. C. Le Masurier, N. I. Williams and D. S. Downs.** Walking for health in pregnancy: assessment by indirect calorimetry and accelerometry. 2008. 79:28-35 |
| **J. M. Dodd, A. R. Deussen, I. Mohamad, et al.** NIHMS777629 Available on 01/01/17] PMC4859433 Available on 01/01/17]; The effect of antenatal lifestyle advice for women who are overweight or obese on secondary measures of neonatal body composition: the LIMIT randomised trial. *BJOG: An International Journal of Obstetrics & Gynaecology.* 2016. 123:244-253 |
| **J. M. Dodd, C. Cramp, Z. Sui, et al.** The effects of antenatal dietary and lifestyle advice for women who are overweight or obese on maternal diet and physical activity: the LIMIT randomised trial. 2014. 12:161 |
| **J. M. Dodd, R. M. Grivell and J. A. Owens.** Antenatal Dietary and Lifestyle Interventions for Women Who are Overweight or Obese: Outcomes from the LIMIT Randomized Trial. 2014. 3:392-399 |
| **J. M. Kinder, T. T. Jiang, J. M. Ertelt, et al.** NIHMS707202 Available on 07/30/16] PMC4522363 Available on 07/30/16]; Cross-Generational Reproductive Fitness Enforced by Microchimeric Maternal Cells. *Cell.* 2015. 162:505-515 |
| **J. M. Nicklas, L. J. Miller, C. A. Zera, R. B. Davis, S. E. Levkoff and E. W. Seely.** Factors associated with depressive symptoms in the early postpartum period among women with recent gestational diabetes mellitus. 2013. 17:1665-1672 |
| **J. M. Pivarnik, A. D. Stein and J. M. Rivera.** Effect of pregnancy on heart rate/oxygen consumption calibration curves. *Medicine & Science in Sports & Exercise.* 2002. 34:750-755 6p |
| **J. M. Pivarnik, L. M. Mudd, E. E. White, R. A. Schlaff and K. L. Peyer.** Physical activity during pregnancy and offspring characteristics at 8-10 years. *Journal of Sports Medicine & Physical Fitness.* 2014. 54:672-679 |
| **J. M. Pivarnik, M. B. Mauer, N. A. Ayres, B. Kirshon, G. A. Dildy and D. B. Cotton.** Effects of chronic exercise on blood volume expansion and hematologic indices during pregnancy. *Obstetrics & Gynecology.* 1994. 83:265-269 |
| **J. M. Pivarnik, N. A. Ayres, M. B. Mauer, D. B. Cotton, B. Kirshon and G. A. Dildy.** Effects of maternal aerobic fitness on cardiorespiratory responses to exercise. / Effets de la condition aerobie maternelle sur les reponses cardiorespiratoires a l ' exercice. *Medicine & Science in Sports & Exercise.* 1993. 25:993-998 |
| **J. M. Pivarnik, N. A. Ayres, M. B. Mauer, D. B. Cotton, B. Kirshon and G. A. Dildy.** Effects of maternal aerobic fitness on cardiorespiratory responses to exercise. 1993. 25:993-998 |
| **J. M. Pivarnik, W. Lee and J. F. Miller.** Physiological and perceptual responses to cycle and treadmill exercise during pregnancy. 1991. 23:470-475 |
| **J. M. Pivarnik, W. Lee, J. F. Miller and J. Werch.** Alterations in plasma volume and protein during cycle exercise throughout pregnancy. 1990. 22:751-755 |
| **J. M. Pivarnik, W. Lee, S. L. Clark, D. B. Cotton, H. T. Spillman and J. F. Miller.** Cardiac output responses of primigravid women during exercise determined by the direct Fick technique. *Obstetrics & Gynecology.* 1990. 75:954-959 |
| **J. M. Pivarnik, W. Lee, T. Spillman, S. L. Clark, D. B. Cotton and J. F. Miller.** Maternal respiration and blood-gases during aerobic exercise performed at moderate altitude. *Med.Sci.Sports Exerc.* 1992. 24:868-872 |
| **J. M. Schlütter, I. Kirkegaard, A. S. Ferreira, et al.** The Number of Endovascular Trophoblasts in Maternal Blood Increases Overnight and after Physical Activity: An Experimental Study. *Fetal.Diagn.Ther.* 2015. |
| **J. M. Schlutter, I. Kirkegaard, L. Hatt, B. Christensen, S. Kolvraa and N. Uldbjerg.** The number of fetal cells in maternal blood increases overnight and after exercise. *Prenat.Diagn.* 2012. 32:23 |
| **J. M. Schlutter, L. Hatt, C. Bach, I. Kirkegaard, S. Kolvraa and N. Uldbjerg.** The cell-free fetal DNA fraction in maternal blood decreases after physical activity. *Prenat.Diagn.* 2014. 34:341-344 |
| **J. M. Walsh, C. McGowan, J. Byrne and F. M. McAuliffe.** Prevalence of physical activity among healthy pregnant women in Ireland. 2011. 114:154-155 |
| **J. M. Wright, C. S. Hoffman, M. J. Nieuwenhuijsen and D. A. Savitz.** The Effect of Swimming During Pregnancy on Fetal Growth. *Water Quality Exposure and Health.* 2011. 3:217-223 |
| **J. Makela, H. Lagstrom, A. Kaljonen, O. Simell and H. Niinikoski.** Hyperglycemia and lower diet quality in pregnant overweight women and increased infant size at birth and at 13 months of age--STEPS study. 2013. 89:439-444 |
| **J. Marcinkevage, A. Correa, U. Ramakrishnan, A. Sharma, K. M. V. Narayan and G. Umpierrez.** Physical activity behaviors and blood glucose levels during first trimester of pregnancy in Urban black women. *Diabetes.* 2012. 61:A636-A637 |
| **J. Marcinkevage, A. Correa, U. Ramakrishnan, A. Sharma, K. M. Venkat Narayan and G. Umpierrez.** Reducing sedentary behavior and increasing physical activity during pregnancy: A feasibility study. *Diabetes.* 2012. 61:A344 |
| **J. N. Olayiwola, O. C. Irizarry, K. O'Connell and S. Milan.** Living Smart, Living Fit: a patient-centered program to improve perinatal outcomes in a community health center population. 2013. 4:31-35 |
| **J. N. Watts, Y. D. Miller and A. L. Marshall.** Depressive symptoms during pregnancy: Exploring the role of sitting. 2013. 6:36-42 |
| **J. Newham, J. Hurley, A. Wittkowski, J. D. Aplin and M. Westwood.** Initials findings of CALMA study (Can Antenatal Yoga Lower Maternal Anxiety). *Journal of Reproductive and Infant Psychology.* 2011. 29 (3):e29-e30 |
| **J. Newham, M. Westwood, A. Wittkowski and J. Aplin.** Efficacy of yoga in reducing maternal anxiety in pregnancy. *Journal of Reproductive and Infant Psychology.* 2010. 28 (3):e13 |
| **J. Orskou, T. B. Henriksen, U. Kesmodel and N. J. Secher.** Maternal characteristics and lifestyle factors and the risk of delivering high birth weight infants. *Obstetrics & Gynecology.* 2003. 102:115-120 |
| **J. P. Manshande, R. Eeckels, V. Manshande-Desmet and R. Vlietinck.** Rest versus heavy work during the last weeks of pregnancy: influence on fetal growth. *British Journal of Obstetrics & Gynaecology.* 1987. 94:1059-1067 |
| **J. P. Pirhonen, P. G. Lindqvist and K. Marsal.** A longitudinal study of maternal oxygen saturation during short-term submaximal exercise. *Clinical Physiology & Functional Imaging.* 2003. 23:37-41 |
| **J. Parizkova and R. Petrasek.** The impact of daily work load during pregnancy on lipid metabolism in the liver of the offspring. *Bibl.Nutr.Dieta.* 1979. 57-64 |
| **J. Pomeroy, F. Renstrom, A. M. Gradmark, et al.** Maternal physical activity and insulin action in pregnancy and their relationships with infant body composition. 2013. 36:267-269 |
| **J. R. Ruiz, M. Perales, M. Pelaez, C. Lopez, A. Lucia and R. Barakat.** Supervised exercise-based intervention to prevent excessive gestational weight gain: A randomized controlled trial. *Mayo Clin.Proc.* 2013. 88:1388-1397 |
| **J. S. Haas, E. Fuentes-Afflick, A. L. Stewart, et al.** Prepregnancy health status and the risk of preterm delivery. 2005. 159:58-63 |
| **J. S. Savage, D. S. Downs, Y. Dong and D. E. Rivera.** PMC4056194; Control systems engineering for optimizing a prenatal weight gain intervention to regulate infant birth weight. *Am.J.Public Health.* 2014. 104:1247-1254 |
| **J. S. Tavares, A. S. O. Melo, M. M. R. Amorim, et al.** Physical activity patterns in pregnant women attending the family health program of Campina Grande - PB. *Revista Brasileira de Epidemiologia.* 2009. 12:10-19 |
| **J. Smedley, J. M. Jancey, S. Dhaliwal, Y. Zhao, S. M. D. R. Monteiro and P. Howat.** Women's reported health behaviours before and during pregnancy: A retrospective study. 2014. 73:28-40 |
| **J. T. Bambicini, V. C. M. Soares, M. R. D. Zanetti, M. R. Torloni, M. C. Ribeiro and R. Mattar.** Effects of aerobic and resistance exercises on glycemic levels of patients with gestational diabetes: Pilot study. *International Journal of Gynecology and Obstetrics.* 2012. 119:S603 |
| **J. Tinloy, C. H. Chuang, J. Zhu, J. Pauli, J. L. Kraschnewski and K. H. Kjerulff.** NIHMS541362 Available on 01/01/15] PMC3913372 Available on 01/01/15]; Exercise during pregnancy and risk of late preterm birth, cesarean delivery, and hospitalizations. *Womens Health Issues.* 2014. 24:e99-e104 |
| **J. Van Eyck, J. Wladimiroff, M. Noordam, H. Tonge and H. Prechtl.** The blood flow velocity waveform in the fetal descending aorta: Its relationship to fetal behavioural states in normal pregnancy at 37-38 weeks. *Early Hum.Dev.* 1985. 12:137-143 |
| **J. W. Van Hook, P. Gill, T. R. Easterling, B. Schmucker, K. Carlson and T. J. Benedetti.** The hemodynamic effects of isometric exercise during late normal pregnancy. 1993. 169:870-873 |
| **J. W. Vanhook, P. Gill, T. R. Easterling, B. Schmucker, K. Carlson and T. J. Benedetti.** The hemodynamic-effects of isometric-exercise during late normal-pregnancy. 1993. 169:870-873 |
| **J. Zhang and D. A. Savitz.** Exercise during pregnancy among US women. *Ann.Epidemiol.* 1996. 6:53-59 |
| **James J. Newham, Carly Allan, Patricia Leahy-Warren, Debbie Carrick-Sen and Fiona Alderdice.** Intentions toward physical activity and resting behavior in pregnant women: Using the theory of planned behavior framework in a cross-sectional study. *Birth: Issues in Perinatal Care.* 2016. 43:49-57 |
| **Jan Pryor.** Physical and behavioural correlates of 12-month development in small-for-gestational age and appropriately grown infants. 1996. 14:233-242 |
| **Janet Baker.** Developing a care pathway for obese women in pregnancy and beyond. 2011. 19:632-643 12 |
| **Jennifer Guida, Swathy Sundaram and Jenn Leiferman.** Antenatal physical activity: Investigating the effects on postpartum depression. 2012. 4:1276-1286 11 |
| **Jennifer Jones, Jeff Housman and Willis McAleese.** Exercise, nutrition, and weight management during pregnancy. 2010. 25:120-128 |
| **Jihong Liu, Sara Wilcox, Kara Whitaker, Christine Blake and Cheryl Addy.** Preventing excessive weight gain during pregnancy and promoting postpartum weight loss: A pilot lifestyle intervention for overweight and obese African American women. 2015. 19:840-849 |
| **Joellen W. Hawkins, Cynthia S. Aber, Alice Cannan, Christine M. Coppinger and Kathleen O'Brien Rafferty.** Women's reported self-care behaviors during pregnancy. 1998. 19:529-538 |
| **Jonathan Y. Huang, Dodie Arnold, Chun-fang Qiu, Raymond S. Miller, Michelle A. Williams and Daniel A. Enquobahrie.** Association of Serum Vitamin D with Symptoms of Depression and Anxiety in Early Pregnancy. 2014. 23:588-595 8 |
| **Jovita A. Daniel, K. Venkateswarlu and Clifford C. Ezeugwu.** Effect of Aerobic Dance Exercise on Blood Pressure of Normotensive Pregnant Women Diagnosed with Gestational Diabetes at Federal Medical Centre, Owerri, South East Nigeria. *Indian Journal of Physiotherapy & Occupational Therapy.* 2015. 9:124-128 |
| **Juan Dertkigil San, J. G. Cecatti, M. A. Sarno, S. R. Cavalcante and E. F. Marussi.** Variation in the amniotic fluid index following moderate physical activity in water during pregnancy. *Acta Obstet.Gynecol.Scand.* 2007. 86:547-552 |
| **K. A. Cooper, M. E. O'Neill, S. N. Hunyor and E. S. Boyce.** Hemodynamic responses of trained and sedentary pregnant women to semi-supine cycling. *Journal of Sports Medicine & Physical Fitness.* 1993. 33:203-204 |
| **K. A. Matthews and J. Rodin.** Pregnancy alters blood pressure responses to psychological and physical challenge. *Psychophysiology.* 1992. 29:232-240 |
| **K. A. Salvesen and S. Morkved.** Randomised controlled trial of pelvic floor muscle training during pregnancy. *Br.Med.J.* 2004. 329:378-380 |
| **K. A. Salvesen, S. N. Stafne, T. M. Eggebo and S. Morkved.** Does regular exercise in pregnancy influence duration of labor? A secondary analysis of a randomized controlled trial. *Acta Obstet.Gynecol.Scand.* 2014. 93:73-79 |
| **K. A. Sauder, A. P. Starling, A. L. Shapiro, et al.** NIHMS788628 Available on 05/01/17] PMC4883104 Available on 05/01/17]; Diet, physical activity and mental health status are associated with dysglycaemia in pregnancy: the Healthy Start Study. *Diabetic Med.* 2016. 33:663-667 |
| **K. B. Lesser, P. A. Gruppuso, R. B. Terry and M. W. Carpenter.** Exercise fails to improve postprandial glycemic excursion in women with gestational diabetes. *J.Matern.Fetal.* 1996. 5:211-217 |
| **K. Baptiste-Roberts, P. Ghosh and W. K. Nicholson.** PMC3236988; Pregravid physical activity, dietary intake, and glucose intolerance during pregnancy. *Journal of Women's Health.* 2011. 20:1847-1851 |
| **K. Bo and L. A. Haakstad.** Is pelvic floor muscle training effective when taught in a general fitness class in pregnancy? A randomised controlled trial. 2011. 97:190-195 |
| **K. Bo, C. Fleten and W. Nystad.** Effect of antenatal pelvic floor muscle training on labor and birth. 2009. 113:1279-1284 |
| **K. Bo, G. Hilde, J. Staer-Jensen, F. Siafarikas, M. K. Tennfjord and M. E. Engh.** Does general exercise training before and during pregnancy influence the pelvic floor "opening" and delivery outcome? A 3D/4D ultrasound study following nulliparous pregnant women from mid-pregnancy to childbirth. *Br.J.Sports Med.* 2015. 49:196-199 |
| **K. Bø, L. A. H. Haakstad and N. Volder.** Do pregnant women exercise their pelvic floor muscles?. 2007. 18:733-736 |
| **K. Borodulin, K. R. Evenson and A. H. Herring.** PMC2784751; Physical activity patterns during pregnancy through postpartum. *BMC Womens Health.* 2009. 9:32 |
| **K. Borodulin, K. R. Evenson, K. Monda, F. Wen, A. H. Herring and N. Dole.** Physical activity and sleep among pregnant women. 2010. 24:45-52 |
| **K. Broekhuizen, E. Althuizen, M. N. van Poppel, M. Donker and W. van Mechelen.** From theory to practice: intervention fidelity in a randomized controlled trial aiming to optimize weight development during pregnancy. 2012. 13:816-825 |
| **K. C. Vollebregt, H. Wolf, K. Boer, van der Wal, M. F., T. G. Vrijkotte and G. J. Bonsel.** Does physical activity in leisure time early in pregnancy reduce the incidence of preeclampsia or gestational hypertension?. 2010. 89:261-267 |
| **K. Davis, S. H. Goodman, J. Leiferman, M. Taylor and S. Dimidjian.** A randomized controlled trial of yoga for pregnant women with symptoms of depression and anxiety. *Complementary therapies in clinical practice.* 2015. 21:166-172 |
| **K. E. Brett, Z. M. Ferraro, M. Holcik and K. B. Adamo.** Prenatal physical activity and diet composition affect the expression of nutrient transporters and mTOR signaling molecules in the human placenta. *Placenta.* 2015. 36:204-212 |
| **K. E. Joung, K. H. Park, A. Filippaios, F. Dincer, H. Christou and C. S. Mantzoros.** Cord blood irisin levels are positively correlated with birth weight in newborn infants. *Metabolism: Clinical and Experimental.* 2015. 64:1507-1514 |
| **K. E. Lynch, J. R. Landsbaugh, B. W. Whitcomb, P. Pekow, G. Markenson and L. Chasan-Taber.** Physical Activity of Pregnant Hispanic Women. *Am.J.Prev.Med.* 2012. 43:434-439 |
| **K. Eliasson, I. Nordlander, B. Larson, M. Hammarstrom and E. Mattsson.** Influence of physical activity on urinary leakage in primiparous women. 2005. 15:87-94 |
| **K. Eliasson, I. Nordlander, E. Mattsson, B. Larson and M. Hammarstrom.** Prevalence of urinary leakage in nulliparous women with respect to physical activity and micturition habits. 2004. 15:149-153 |
| **K. F. Foxcroft, I. J. Rowlands, N. M. Byrne, H. D. McIntyre, L. K. Callaway and Bambino group.** Exercise in obese pregnant women: the role of social factors, lifestyle and pregnancy symptoms. 2011. 11:4 |
| **K. F. Koltyn.** Mood changes in pregnant women following an exercise session and a prenatal information session. 1994. 4:191-195 |
| **K. F. Putnam, L. A. Mueller, E. F. Magann, et al.** Evaluating effects of self-reported domestic physical activity on pregnancy and neonatal outcomes in "stay at home" military wives. *Mil.Med.* 2013. 178:893-898 |
| **K. Fieril, A. Glantz and M. Fagevik Olsen.** Hemodynamic responses to single sessions of aerobic exercise and resistance exercise in pregnancy. *Acta Obstet.Gynecol.Scand.* 2016. 21:21 |
| **K. Gjestland, K. Bo, K. M. Owe and M. Eberhard-Gran.** Do pregnant women follow exercise guidelines? Prevalence data among 3482 women, and prediction of low-back pain, pelvic girdle pain and depression. 2013. 47:515-520 |
| **K. Godfrey, K. Walker-Bone, S. Robinson, et al.** Neonatal bone mass: influence of parental birthweight, maternal smoking, body composition, and activity during pregnancy. *Journal of Bone & Mineral Research.* 2001. 16:1694-1703 |
| **K. H. Paul, M. L. Graham and C. M. Olson.** The web of risk factors for excessive gestational weight gain in low income women. 2013. 17:344-351 |
| **K. Haby, A. Glantz, R. Hanas and A. Premberg.** Mighty Mums - An antenatal health care intervention can reduce gestational weight gain in women with obesity. 2015. 31:685-692 |
| **K. Ihrman.** A clinical and physiological study of pregnancy in a material from northern Sweden. VIII. The effect of physical training during pregnancy on the circulatory adjustment. *Acta Soc.Med.Ups.* 1960. 65:335-347 |
| **K. J. Guelfi and R. E. Halse.** Moderate-intensity exercise affects perceived hunger and fullness but not appetite-related hormones in late pregnancy. 2013. 38:1162-1165 |
| **K. J. Guelfi, C. Wang, J. A. Dimmock, B. Jackson, J. P. Newnham and H. Yang.** PMC4689036; A comparison of beliefs about exercise during pregnancy between Chinese and Australian pregnant women. *BMC Pregnancy & Childbirth.* 2015. 15:345 |
| **K. J. Guelfi, M. J. Ong, P. A. Fournier, et al.** Does supervised home-based exercise during pregnancy reduce the recurrence of gestational diabetes? A randomised controlled trial. *J.Paediatr.Child Health.* 2015. 51:35 |
| **K. K. Garnaes, S. Morkved, O. Salvesen and T. Moholdt.** Exercise Training and Weight Gain in Obese Pregnant Women: A Randomized Controlled Trial (ETIP Trial). *PLoS Medicine / Public Library of Science.* 2016. 13:e1002079 |
| **K. Kumareswaran, D. Elleri, J. M. Allen, et al.** Accuracy of continuous glucose monitoring during exercise in type 1 diabetes pregnancy. 2013. 15:223-229 |
| **K. Kumareswaran, D. Elleri, J. M. Allen, et al.** Physical activity energy expenditure and glucose control in pregnant women with type 1 diabetes: is 30 minutes of daily exercise enough?. 2013. 36:1095-1101 |
| **K. L. Kong, C. Campbell, K. Wagner, A. Peterson and L. Lanningham-Foster.** Impact of a walking intervention during pregnancy on post-partum weight retention and infant anthropometric outcomes. *Journal of developmental origins of health and disease.* 2014. 5:259-267 |
| **K. L. Kong, C. G. Campbell, R. C. Foster, A. D. Peterson and L. Lanningham-Foster.** A pilot walking program promotes moderate-intensity physical activity during pregnancy. *Medicine & Science in Sports & Exercise.* 2014. 46:462-471 |
| **K. L. Kong, M. W. Gillman, S. Rifas-Shiman and X. Wen.** Leisure time physical activity before and during mid-pregnancy and offspring adiposity in mid-childhood. *Pediatric Obesity.* 2015. |
| **K. L. Kong, M. W. Gillman, S. Rifas-Shiman and X. Wen.** NIHMS744771 PMC4695314; Leisure time physical activity before and during mid-pregnancy and offspring adiposity in mid-childhood. *Pediatric Obesity.* 2016. 11:81-87 |
| **K. L. Lindsay, C. Heneghan, B. McNulty, L. Brennan and F. M. McAuliffe.** Lifestyle and dietary habits of an obese pregnant cohort. 2015. 19:25-32 |
| **K. L. Lindsay, C. Heneghan, C. A. McGowan, L. Brennan and F. M. McAuliffe.** Lifestyle habits in obese pregnancy: A case-control study. *Archives of Disease in Childhood: Fetal and Neonatal Edition.* 2013. 98: |
| **K. Lagana.** Come bien, camina y no se preocupe--eat right, walk, and do not worry: selective biculturalism during pregnancy in a Mexican American community. 2003. 14:117-124 |
| **K. M. Borodulin, K. R. Evenson, F. Wen, A. H. Herring and A. M. Benson.** Physical activity patterns during pregnancy. 2008. 40:1901-1908 |
| **K. M. Owe, E. K. Bjelland, B. Stuge, N. Orsini, M. Eberhard-Gran and S. Vangen.** Exercise level before pregnancy and engaging in high-impact sports reduce the risk of pelvic girdle pain: a population-based cohort study of 39 184 women. *Br.J.Sports Med.* 2016. 50:817-822 |
| **K. M. Owe, W. Nystad and K. B.** Correlates of regular exercise during pregnancy: the Norwegian Mother and Child Cohort Study. *Scand.J.Med.Sci.Sports.* 2009. 19:637-645 |
| **K. M. Owe, W. Nystad and K. Bo.** Association between regular exercise and excessive newborn birth weight. *Obstetrics & Gynecology.* 2009. 114:770-776 |
| **K. M. Owe, W. Nystad and K. Bø.** Correlates of regular exercise during pregnancy: The Norwegian Mother and Child Cohort Study. 2009. 19:637-645 |
| **K. M. Owe, W. Nystad, R. Skjaerven, H. Stigum and K. Bo.** Exercise during pregnancy and the gestational age distribution: a cohort study. *Medicine & Science in Sports & Exercise.* 2012. 44:1067-1074 |
| **K. M. Smith and C. G. Campbell.** Physical activity during pregnancy: impact of applying different physical activity guidelines. 2013. 2013:165617 |
| **K. M. Smith, R. C. Foster and C. G. Campbell.** PMC3221627; Accuracy of physical activity assessment during pregnancy: an observational study. *BMC Pregnancy & Childbirth.* 2011. 11:86 |
| **K. M. Songoygard, S. N. Stafne, K. A. Evensen, K. A. Salvesen, T. Vik and S. Morkved.** Does exercise during pregnancy prevent postnatal depression? A randomized controlled trial. 2012. 91:62-67 |
| **K. Marsal, G. Gennser and O. Lofgren.** Effects on fetal breathing movements of maternal challenges. Cross-over study on dynamic work, static work, passive movements, hyperventilation and hyperoxygenation. *Acta Obstet.Gynecol.Scand.* 1979. 58:335-342 |
| **K. Mattran, L. M. Mudd, R. A. Rudey and J. S. Kelly.** Leisure-time physical activity during pregnancy and offspring size at 18 to 24 months. *Journal of Physical Activity & Health.* 2011. 8:655-662 |
| **K. Melzer, Y. Schutz, M. Boulvain and B. Kayser.** Pregnancy-related changes in activity energy expenditure and resting metabolic rate in Switzerland. *Eur.J.Clin.Nutr.* 2009. 63:1185-1191 |
| **K. Melzer, Y. Schutz, N. Soehnchen, et al.** Effects of recommended levels of physical activity on pregnancy outcomes. *American Journal of Obstetrics & Gynecology.* 2010. 202:266.e1-266.e6 |
| **K. Morkrid, A. K. Jenum, S. Berntsen, et al.** Objectively recorded physical activity and the association with gestational diabetes. 2014. 24:e389-97 |
| **K. N. Mitchell and B. S. Macneill.** The aerobic capacity of pregnant-women during nonweight-bearing versus weight-bearing exercise. 1988. 68:860-860 |
| **K. Nelson, V. Lohsoonthorn and M. A. Williams.** Preterm delivery risk in relation to maternal occupational and leisure time physical activity among thai women. *Asian Biomedicine.* 2009. 3:267-277 |
| **K. P. Fieril, M. F. Olsén, A. Glantz and M. Larsson.** Experiences of exercise during pregnancy among women who perform regular resistance training: A qualitative study. *Phys.Ther.* 2014. 94:1135-1143 |
| **K. Petrov Fieril, A. Glantz and M. Fagevik Olsen.** The efficacy of moderate-to-vigorous resistance exercise during pregnancy: a randomized controlled trial. *Acta Obstet.Gynecol.Scand.* 2015. 94:35-42 |
| **K. Phan, P. Bidulka, Y. H. Gomez, et al.** Effect of Acute Weight Gain and Physical Activity on Arterial Stiffness in Pregnant Women at High Risk for Hypertensive Disorders of Pregnancy. *Can.J.Cardiol.* 2016. 32:S5 |
| **K. Piravej and R. Saksirinukul.** Survey of patterns, attitudes, and the general effects of exercise during pregnancy in 203 Thai pregnant women at King Chulalongkorn Memorial Hospital. *Journal of the Medical Association of Thailand.* 2001. 84 Suppl 1:S276-82 |
| **K. Polanska, P. Muszynski, W. Sobala, E. Dziewirska, D. Merecz-Kot and W. Hanke.** Maternal lifestyle during pregnancy and child psychomotor development - Polish Mother and Child Cohort study. *Early Hum.Dev.* 2015. 91:317-325 |
| **K. Przybylowicz, M. Przybylowicz, M. Grzybiak and K. Janiszewska.** Effects of physical activity during pregnancy and gestational weight gain on newborn weight and length at birth in Warminsko-Mazurskie province. *Acta Scientiarum Polonorum Technologia Alimentaria.* 2014. 13:203-211 |
| **K. R. Evenson and F. Wen.** National trends in self-reported physical activity and sedentary behaviors among pregnant women: NHANES 1999-2006. *Prev.Med.* 2010. 50:123-128 |
| **K. R. Evenson and F. Wen.** Prevalence and correlates of objectively measured physical activity and sedentary behavior among US pregnant women. *Prev.Med.* 2011. 53:39-43 |
| **K. R. Evenson, A. Siega-Riz, D. A. Savitz, J. A. Leiferman and J. M. Thorp J.** Vigorous leisure activity and pregnancy outcome. *Epidemiology.* 2002. 13:653-659 |
| **K. R. Evenson, D. A. Savitz and S. L. Huston.** Leisure-time physical activity among pregnant women in the US. 2004. 18:400-407 |
| **K. R. Heineman, S. La Bastide-Van Gemert, V. Fidler, K. J. Middelburg, A. F. Bos and M. Hadders-Algra.** Construct validity of the Infant Motor Profile: relation with prenatal, perinatal, and neonatal risk factors. 2010. 52:e209-15 |
| **K. R. Kardel.** Effects of intense training during and after pregnancy in top-level athletes. *Scand.J.Med.Sci.Sports.* 2005. 15:79-86 |
| **K. R. Richardsen, I. Mdala, S. Berntsen, et al.** PMC4936091; Objectively recorded physical activity in pregnancy and postpartum in a multi-ethnic cohort: association with access to recreational areas in the neighbourhood. *International Journal of Behavioral Nutrition & Physical Activity.* 2016. 13:78 |
| **K. R. Richardsen, R. S. Falk, A. K. Jenum, et al.** PMC4962490; Predicting who fails to meet the physical activity guideline in pregnancy: a prospective study of objectively recorded physical activity in a population-based multi-ethnic cohort. *BMC Pregnancy & Childbirth.* 2016. 16:186 |
| **K. Rauh, E. Gabriel, E. Kerschbaum, et al.** PMC3718707; Safety and efficacy of a lifestyle intervention for pregnant women to prevent excessive maternal weight gain: a cluster-randomized controlled trial. *BMC Pregnancy & Childbirth.* 2013. 13:151 |
| **K. Rauh, J. Gunther, J. Kunath, L. Stecher and H. Hauner.** PMC4608142; Lifestyle intervention to prevent excessive maternal weight gain: mother and infant follow-up at 12 months postpartum. *BMC Pregnancy & Childbirth.* 2015. 15:265 |
| **K. Renault, K. Norgaard, K. R. Andreasen, N. J. Secher and L. Nilas.** Physical activity during pregnancy in obese and normal-weight women as assessed by pedometer. *Acta Obstet.Gynecol.Scand.* 2010. 89:956-961 |
| **K. Renault, K. Norgaard, K. R. Andreasen, N. J. Secher and L. Nilas.** Physical activity during pregnancy in obese and normal-weight women as assessed by pedometer. *Acta Obstet.Gynecol.Scand.* 2010. 89:956-961 |
| **K. Renault, K. Norgaard, N. J. Secher, K. R. Andreasen, B. Baldur-Felskov and L. Nilas.** Physical activity during pregnancy in normal-weight and obese women: compliance using pedometer assessment. *Journal of Obstetrics & Gynaecology.* 2012. 32:430-433 |
| **K. S. Haugland, S. Rasmussen and A. K. Daltveit.** Group intervention for women with pelvic girdle pain in pregnancy. A randomized controlled trial. 2006. 85:1320-1326 |
| **K. Sjogren Forss, E. Ekvall Hansson, M. Troein and L. Stjernberg.** Patterns of physical activity among women and men before and during pregnancy. 2014. 128:814-816 |
| **K. Smith, L. Lanningham-Foster, A. Welch and C. Campbell.** Web-Based Behavioral Intervention Increases Maternal Exercise but Does Not Prevent Excessive Gestational Weight Gain in Previously Sedentary Women. *Journal of Physical Activity & Health.* 2016. 13:587-593 |
| **K. Soiva, A. Salmi, M. Groenroos and T. Peltonen.** Physical Working Capacity during Pregnancy and Effect of Physical Work Tests on Foetal Heart Rate. *Ann.Chir.Gynaecol.Fenn.* 1964. 53:187-196 |
| **K. T. Kasawara, C. S. Burgos, S. L. do Nascimento, N. O. Ferreira, F. G. Surita and E. S. Pinto.** PMC3753734; Maternal and Perinatal Outcomes of Exercise in Pregnant Women with Chronic Hypertension and/or Previous Preeclampsia: A Randomized Controlled Trial. *ISRN Obstetrics & Gynecology.* 2013. 2013:857047 |
| **K. Ueland, M. J. Novy and J. Metcalfe.** Cardiorespiratory responses to pregnancy and exercise in normal women and patients with heart disease. *American Journal of Obstetrics & Gynecology.* 1973. 115:4-10 |
| **K. Ueland, M. J. Novy and J. Metcalfe.** Cardiorespiratory responses to pregnancy and exercise in normal women and patients with heart disease. 1973. 115:4-10 |
| **K. Ueland, M. J. Novy, E. N. Peterson and J. Metcalfe.** Maternal cardiovascular dynamics. IV. The influence of gestational age on the maternal cardiovascular response to posture and exercise. *American Journal of Obstetrics & Gynecology.* 1969. 104:856-864 |
| **K. Wulff and R. Siegmund.** Emergence of circadian rhythms in infants before and after birth: evidence for variations by parental influence]. *Z.Geburtshilfe Neonatol.* 2002. 206:166-171 |
| **Kimberly R. Andringa, Tyler Bardsley, Amy H. Herring and SeonAe Yeo.** The Impact of Symptom Type and Frequency on Activity Level During Pregnancy. *Journal of Women's Health Physical Therapy.* 2013. 37:4-10 7p |
| **L. A. Dias, P. Driusso, D. L. Aita, S. M. Quintana, K. Bo and C. H. Ferreira.** Effect of pelvic floor muscle training on labour and newborn outcomes: a randomized controlled trial. *Revista Brasileira de Fisioterapia.* 2011. 15:487-493 |
| **L. A. D'Silva, R. E. Davies, S. J. Emery and M. J. Lewis.** Influence of somatic state on cardiovascular measurements in pregnancy. 2014. 35:15-29 |
| **L. A. Haakstad and K. Bo.** Effect of a regular exercise programme on pelvic girdle and low back pain in previously inactive pregnant women: A randomized controlled trial. 2015. 47:229-234 |
| **L. A. Haakstad and K. Bo.** PMC3198740; Exercise in pregnant women and birth weight: a randomized controlled trial. *BMC Pregnancy & Childbirth.* 2011. 11:66 |
| **L. A. Haakstad, B. Torset and K. Bo.** What is the effect of regular group exercise on maternal psychological outcomes and common pregnancy complaints? An assessor blinded RCT. *Midwifery.* 2016. 32:81-86 |
| **L. A. Haakstad, E. Edvardsen and K. Bo.** Effect of regular exercise on blood pressure in normotensive pregnant women. A randomized controlled trial. *Hypertension in Pregnancy.* 2016. 35:170-180 |
| **L. A. Haakstad, I. Gundersen and K. Bo.** Self-reporting compared to motion monitor in the measurement of physical activity during pregnancy. 2010. 89:749-756 |
| **L. A. Haakstad, N. Voldner and K. Bo.** Stages of change model for participation in physical activity during pregnancy. 2013. 2013:193170 |
| **L. A. Haakstad, N. Voldner, T. Henriksen and K. Bo.** Physical activity level and weight gain in a cohort of pregnant Norwegian women. 2007. 86:559-564 |
| **L. A. Haakstad, N. Voldner, T. Henriksen and K. Bo.** Why do pregnant women stop exercising in the third trimester?. *Acta Obstet.Gynecol.Scand.* 2009. 88:1267-1275 |
| **L. A. Millard, D. A. Lawlor, A. Fraser and L. D. Howe.** PMC3787488; Physical activity during pregnancy and offspring cardiovascular risk factors: findings from a prospective cohort study.Erratum appears in BMJ Open. 2013;3(12):e003574corr1]. *BMJ Open.* 2013. 3:e003574 |
| **L. A. Pompeii, D. A. Savitz, K. R. Evenson, B. Rogers and M. McMahon.** Physical exertion at work and the risk of preterm delivery and small-for-gestational-age birth. *Obstetrics & Gynecology.* 2005. 106:1279-1288 |
| **L. A. Wolfe, A. P. Heenan and A. Bonen.** Aerobic conditioning effects on substrate responses during graded cycling in pregnancy. *Canadian Journal of Physiology & Pharmacology.* 2003. 81:696-703 |
| **L. A. Wolfe, R. J. Preston, G. W. Burggraf and M. J. McGrath.** Effects of pregnancy and chronic exercise on maternal cardiac structure and function. *Canadian Journal of Physiology & Pharmacology.* 1999. 77:909-917 |
| **L. A. Wolfe, R. M. Walker, A. Bonen and M. J. McGrath.** Effects of pregnancy and chronic exercise on respiratory responses to graded exercise. 1994. 76:1928-1936 |
| **L. Atkinson, R. L. Shaw and D. P. French.** Is pregnancy a teachable moment for diet and physical activity behaviour change? An interpretative phenomenological analysis of the experiences of women during their first pregnancy. *British Journal of Health Psychology.* 2016. 11:11 |
| **L. Back, A. Hui, A. Reid, et al.** Comparison of physical activity and nutritional intake in first nations pregnant women in remote communities and urban-living pregnant women. 2012. 36:64-67 |
| **L. Baghirzada, K. N. Downey and A. J. Macarthur.** Assessment of quality of life indicators in the postpartum period. 2013. 22:209-216 |
| **L. Basso, P. T. McCollum, M. R. N. Darling, W. A. Tocchi and W. A. Tanner.** A descriptive study of pregnant women with gallstones. Relation to dietary and social habits, education, physical activity, height, and weight. 1992. 8:629-633 |
| **L. Broberg, A. S. Ersboll, M. G. Backhausen, P. Damm, A. Tabor and H. K. Hegaard.** Compliance with national recommendations for exercise during early pregnancy in a Danish cohort. *Bmc Pregnancy and Childbirth.* 2015. 15: |
| **L. C. Silveira and C. A. Segre.** Physical exercise during pregnancy and its influence in the type of birth. 2012. 10:409-414 |
| **L. Chasan-Taber, B. H. Marcus, E. Stanek 3, et al.** PMC2851124; A randomized controlled trial of prenatal physical activity to prevent gestational diabetes: design and methods. *Journal of Women's Health.* 2009. 18:851-859 |
| **L. Chasan-Taber, M. D. Schmidt, P. Pekow, B. Sternfeld, J. Manson and G. Markenson.** Correlates of physical activity in pregnancy among Latina women. 2007. 11:353-363 |
| **L. Chasan-Taber, M. D. Schmidt, P. Pekow, et al.** Physical activity and gestational diabetes mellitus among Hispanic women. *Journal of Women's Health.* 2008. 17:999-1008 |
| **L. Chasan-Taber, M. Silveira, B. H. Marcus, B. Braun, E. Stanek and G. Markenson.** Feasibility and efficacy of a physical activity intervention among pregnant women: the behaviors affecting baby and you (B.A.B.Y.) study. *Journal of physical activity & health.* 2011. 8 Suppl 2:228 |
| **L. Chasan-Taber, M. Silveira, K. E. Lynch, et al.** Physical activity before and during pregnancy and risk of abnormal glucose tolerance among Hispanic women. *Diabetes Metab.* 2014. 40:67-75 |
| **L. Chasan-Taber, M. Silveira, K. E. Lynch, P. Pekow, C. G. Solomon and G. Markenson.** Physical activity and gestational weight gain in Hispanic women. 2014. 22:909-918 |
| **L. Chasan-Taber, M. Silveira, P. Pekow, et al.** Physical activity, sedentary behavior and risk of hypertensive disorders of pregnancy in Hispanic women. 2015. 34:1-16 |
| **L. Chasan-Taber, R. T. Fortner, A. Gollenberg, J. Buonnaccorsi, N. Dole and G. Markenson.** A prospective cohort study of modifiable risk factors for gestational diabetes among Hispanic women: design and baseline characteristics. 2010. 19:117-124 |
| **L. Chu, R. Retnakaran, B. Zinman, A. J. G. Hanley and J. K. Hamilton.** Impact of maternal physical activity and infant feeding practices on infant weight gain and adiposity. 2012. 2012: |
| **L. Currie, C. Woolcott, D. F. Fell, B. A. Armson and L. Dodds.** Physical activity and pregnancy outcomes. *Am.J.Epidemiol.* 2011. 173:S214 |
| **L. D. Devoe, M. Arthur and N. Searle.** The effects of maternal ambulation on the nonstress test. *American Journal of Obstetrics & Gynecology.* 1987. 157:240-244 |
| **L. D. Platt, R. Artal, J. Semel, L. Sipos and R. K. Kammula.** Exercise in pregnancy. II. Fetal responses. *American Journal of Obstetrics & Gynecology.* 1983. 147:487-491 |
| **L. de Wit, J. G. Jelsma, M. N. van Poppel, et al.** PMC4521453; Physical activity, depressed mood and pregnancy worries in European obese pregnant women: results from the DALI study. *BMC Pregnancy & Childbirth.* 2015. 15:158 |
| **L. Dibblee and T. E. Graham.** A longitudinal study of changes in aerobic fitness, body composition, and energy intake in primigravid patients. *American Journal of Obstetrics & Gynecology.* 1983. 147:908-914 |
| **L. E. May, J. Knowlton, J. Hanson, et al.** Effects of Exercise During Pregnancy on Maternal Heart Rate and Heart Rate Variability. *Pm & R.* 2016. 8:611-617 |
| **L. E. May, S. A. Scholtz, R. Suminski and K. M. Gustafson.** Aerobic exercise during pregnancy influences infant heart rate variability at one month of age. *Early Hum.Dev.* 2014. 90:33-38 |
| **L. E. McCullough, M. A. Mendez, E. E. Miller, A. P. Murtha, S. K. Murphy and C. Hoyo.** PMC4622928 Available on 04/30/16]; Associations between prenatal physical activity, birth weight, and DNA methylation at genomically imprinted domains in a multiethnic newborn cohort. *Epigenetics: Official Journal of the DNA Methylation Society.* 2015. 10:597-606 |
| **L. Fairley, G. Santorelli, D. A. Lawlor, et al.** PMC4510905; The relationship between early life modifiable risk factors for childhood obesity, ethnicity and body mass index at age 3 years: findings from the Born in Bradford birth cohort study. *BMC Obesity.* 2015. 2:9 |
| **L. Fenster, A. E. Hubbard, G. C. Windham, K. O. Waller and S. H. Swan.** A prospective study of work-related physical exertion and spontaneous abortion. *Epidemiology.* 1997. 8:66-74 |
| **L. Goni, M. Cuervo, S. Santiago, I. Zazpe and J. A. Martinez.** Parity implications for anthropometrical variables, lifestyle behaviors and dietary habits in pregnant women. *Anales del Sistema Sanitario de Navarra.* 2014. 37:349-362 |
| **L. H. Colbert, B. I. Graubard, K. B. Michels, W. C. Willett and M. R. Forman.** Physical activity during pregnancy and age at menarche of the daughter. *Cancer Epidemiology Biomarkers & Prevention.* 2008. 17:2656-2662 |
| **L. Haakstad and K. Bo.** Effect of supervised aerobic dance exercise in prevention of excessive weight gain in pregnancy: A single blind randomized controlled trial. *International Journal of Gynecology and Obstetrics.* 2009. 107:S198 |
| **L. Hayes, C. McParlin, T. I. Kinnunen, et al.** PMC4352291; Change in level of physical activity during pregnancy in obese women: findings from the UPBEAT pilot trial. *BMC Pregnancy & Childbirth.* 2015. 15:52 |
| **L. Hayes, R. Bell, S. C. Robson and L. Poston.** Physical activity in the uk pregnancy better eating and physical activity trial (UPBEAT). *Diabetic Med.* 2016. 33:6-7 |
| **L. J. Lee, E. Symanski, P. J. Lupo, et al.** HHSPA786527 Available on 02/01/17] PMC4888062 Available on 02/01/17]; Data linkage between the National Birth Defects Prevention Study and the Occupational Information Network (O NET) to assess workplace physical activity, sedentary behaviors, and emotional stressors during pregnancy. *Am.J.Ind.Med.* 2016. 59:137-149 |
| **L. J. Mayberry, M. Smith and P. Gill.** Effect of exercise on uterine activity in the patient in preterm labor. 1992. 12:354-358 |
| **L. Jovanovic-Peterson, E. P. Durak and C. M. Peterson.** Randomized trial of diet versus diet plus cardiovascular conditioning on glucose levels in gestational diabetes. *American Journal of Obstetrics & Gynecology.* 1989. 161:415-419 |
| **L. K. Andersen, M. Backhausen, H. K. Hegaard and M. Juhl.** Physical exercise and pelvic girdle pain in pregnancy: A nested case-control study within the Danish National Birth Cohort. 2015. 6:198-203 |
| **L. K. Badr, B. Abdallah and A. Mahmoud.** Precursors of preterm birth: comparison of three ethnic groups in the middle East and the United States. 2005. 34:444-452 |
| **L. K. Callaway, P. B. Colditz, N. M. Byrne, et al.** PMC2890340; Prevention of gestational diabetes: feasibility issues for an exercise intervention in obese pregnant women. *Diabetes Care.* 2010. 33:1457-1459 |
| **L. K. Micklesfield, N. S. Levitt, M. T. Carstens, M. A. Dhansay, S. A. Norris and E. V. Lambert.** Early life and current determinants of bone in South African children of mixed ancestral origin. 2007. 34:647-655 |
| **L. Kovaleva.** Assessment of risk factors of urinary incontinence in pregnancy, effect of pelvic floor muscle training. *Int.Urogynecol.J.Pelvic Floor Dysfunct.* 2011. 22:S1473 |
| **L. Larsson and P. G. Lindqvist.** Low-impact exercise during pregnancy--a study of safety. *Acta Obstet.Gynecol.Scand.* 2005. 84:34-38 |
| **L. M. Currie, C. G. Woolcott, D. B. Fell, B. A. Armson and L. Dodds.** The association between physical activity and maternal and neonatal outcomes: a prospective cohort. *Maternal & Child Health Journal.* 2014. 18:1823-1830 |
| **L. M. McCowan, C. T. Roberts, G. A. Dekker, et al.** Risk factors for small-for-gestational-age infants by customised birthweight centiles: data from an international prospective cohort study. *BJOG: An International Journal of Obstetrics & Gynaecology.* 2010. 117:1599-1607 |
| **L. M. Mudd, J. Pivarnik, C. B. Holzman, N. Paneth, K. Pfeiffer and H. Chung.** NIHMS574330 PMC4051283; Leisure-time physical activity in pregnancy and the birth weight distribution: where is the effect?. *Journal of Physical Activity & Health.* 2012. 9:1168-1177 |
| **L. M. Mudd, J. Pivarnik, C. B. Holzman, N. Paneth, K. Pfeiffer and H. Chung.** Leisure-time physical activity in pregnancy and the birth weight distribution: where is the effect?. 2012. 9:1168-1177 |
| **L. M. Sorbye, K. Klungsoyr, O. Samdal, K. M. Owe and N. H. Morken.** NIHMS649381 Available on 09/01/16] PMC4523494 Available on 09/01/16]; Pre-pregnant body mass index and recreational physical activity: effects on perinatal mortality in a prospective pregnancy cohort. *BJOG: An International Journal of Obstetrics & Gynaecology.* 2015. 122:1322-1330 |
| **L. M. Szymanski and A. J. Satin.** NIHMS351567 PMC3297473; Exercise during pregnancy: fetal responses to current public health guidelines. *Obstetrics & Gynecology.* 2012. 119:603-610 |
| **L. Mason, B. Roe, H. Wong, J. Davies and J. Bamber.** The role of antenatal pelvic floor muscle exercises in prevention of postpartum stress incontinence: a randomised controlled trial. 2010. 19:2777-2786 |
| **L. Mason, S. Glenn, I. Walton and C. Hughes.** Do women practise pelvic floor exercises during pregnancy or following delivery?. 2001. 87:662-670 |
| **L. Mason, S. Glenn, I. Walton and C. Hughes.** The relationship between between ante-natal pelvic floor muscle exercises and post-partum stress incontinence. 2001. 87:651-670 14 |
| **L. Mason.** Stress incontinence in childbearing women. 2001. 7:72-75 4 |
| **L. Nilsson-Wikmar, K. Holm, R. Oijerstedt and K. Harms-Ringdahl.** Effect of three different physical therapy treatments on pain and activity in pregnant women with pelvic girdle pain: A randomized clinical trial with 3, 6, and 12 months follow-up postpartum. *Spine.* 2005. 30:850-856 |
| **L. Nilsson-Wikmar, K. Holm, R. Oijerstedt and K. Harms-Ringdahl.** Effect of three different physical therapy treatments on pain and activity in pregnant women with pelvic girdle pain: a randomized clinical trial with 3, 6, and 12 months follow-up postpartum. 2005. 30:850-856 |
| **L. Orawan and W. Preecha.** Effect of pelvic floor muscle training (PFMT) during pregnancy on bladder neck descend and delivery. *Journal of the Medical Association of Thailand.* 2014. 97:S156-S163 |
| **L. Poston, A. L. Briley, S. Barr, et al.** PMC3718630; Developing a complex intervention for diet and activity behaviour change in obese pregnant women (the UPBEAT trial); assessment of behavioural change and process evaluation in a pilot randomised controlled trial. *BMC Pregnancy & Childbirth.* 2013. 13:148 |
| **L. Poston, R. Bell, H. Croker, et al.** Effect of a behavioural intervention in obese pregnant women (the UPBEAT study): A multicentre, randomised controlled trial. *The Lancet Diabetes and Endocrinology.* 2015. 3:767-777 |
| **L. R. D. Varella, V. B. Torres, P. H. M. Angelo, et al.** Influence of parity, type of delivery, and physical activity level on pelvic floor muscles in postmenopausal women. *Journal of Physical Therapy Science.* 2016. 28:824-830 |
| **L. R. Sagedal, B. Sanda, N. C. Overby, et al.** The effect of prenatal lifestyle intervention on weight retention 12 months postpartum: results of the Norwegian Fit for Delivery randomised controlled trial. *BJOG: An International Journal of Obstetrics & Gynaecology.* 2016. 20:20 |
| **L. R. Sagedal, N. C. Overby, E. Bere, et al.** Lifestyle intervention to limit gestational weight gain: the Norwegian Fit for Delivery randomised controlled trial. *BJOG: An International Journal of Obstetrics & Gynaecology.* 2016. 14:14 |
| **L. R. Sagedal, N. C. Overby, H. Lohne-Seiler, et al.** PMC3577450; Study protocol: fit for delivery - can a lifestyle intervention in pregnancy result in measurable health benefits for mothers and newborns? A randomized controlled trial. *BMC Public Health.* 2013. 13:132 |
| **L. R. Varella, V. B. Torres, P. H. Angelo, et al.** PMC4842447; Influence of parity, type of delivery, and physical activity level on pelvic floor muscles in postmenopausal women. *Journal of Physical Therapy Science.* 2016. 28:824-830 |
| **L. Rodr**. Treatment compliance in pregnant women with gestational diabetes after an education program: relationship with anxiety and sociodemographic variables. 2004. 14:318-327 10 |
| **L. S. Adair, C. W. Kuzawa and J. Borja.** Maternal energy stores and diet composition during pregnancy program adolescent blood pressure. *Circulation.* 2001. 104:1034-1039 |
| **L. Schack-Nielsen, C. Molgaard, D. Larsen, C. Martyn and K. F. Michaelsen.** Arterial stiffness in 10-year-old children: Current and early determinants. 2005. 94:1004-1011 |
| **L. Spatling, F. Fallenstein, A. Huch, R. Huch and G. Rooth.** The variability of cardiopulmonary adaptation to pregnancy at rest and during exercise. 1992. 99 Suppl 8:1-40 |
| **L. Z. Jaime, B. M. Manuela, O. C. Catalina, J. M. I. Mar**. Physical activity level according to GPAQ in pregnant and postpartum women attended in a family health center. *Rev.Chil.Obstet.Ginecol.* 2013. 78:425-431 |
| **L. Zhu, L. Li, J. H. Lang and T. Xu.** Prevalence and risk factors for peri- and postpartum urinary incontinence in primiparous women in China: a prospective longitudinal study. 2012. 23:563-572 |
| **Lanay M. Mudd, Jim M. Pivarnik, Karin A. Pfeiffer, Nigel Paneth, Hwan Chung and Claudia Holzman.** Maternal physical activity during pregnancy, child leisure-time activity, and child weight status at 3 to 9 years. *Journal of Physical Activity & Health.* 2015. 12:506-514 |
| **Lene A. H. Haakstad and Kari Bo.** Effect of a regular exercise programme on pelvic girdle and low back pain in previously inactive pregnant women: a randomized controlled trial. *Journal of Rehabilitation Medicine (Stiftelsen Rehabiliteringsinformation).* 2015. 47:229-234 6p |
| **Lisa A. Uebelacker, Cynthia L. Battle, Kaeli A. Sutton, Susanna R. Magee and Ivan W. Miller.** A pilot randomized controlled trial comparing prenatal yoga to perinatal health education for antenatal depression. 2015. No Pagination Specified |
| **Lou Atkinson, Ellinor K. Olander and David P. French.** Acceptability of a weight management intervention for pregnant and postpartum women with BMI >30 kg/m2: A qualitative evaluation of an individualized, home-based service. *Matern.Child Health J.* 2016. 20:88-96 |
| **Lucy C. Chappell, Paul T. Seed, Jenny Myers, et al.** Exploration and confirmation of factors associated with uncomplicated pregnancy in nulliparous women: prospective cohort study. 2015. 49:136-136 |
| **M. A. Carvalhaes, A. C. Martiniano, M. B. Malta, M. Y. Takito and M. H. Benicio.** [Physical activity in pregnant women receiving care in primary health care units]. 2013. 47:958-967 |
| **M. A. Klebanoff, P. H. Shiono and J. C. Carey.** The effect of physical activity during pregnancy on preterm delivery and birth weight. *American Journal of Obstetrics & Gynecology.* 1990. 163:1450-1456 |
| **M. A. Kominiarek.** A survey of health behaviors in minority women in pregnancy: the influence of body mass index. 2014. 24:e291-5 |
| **M. A. Miquelutti, J. G. Cecatti and M. Y. Makuch.** PMC3750492; Evaluation of a birth preparation program on lumbopelvic pain, urinary incontinence, anxiety and exercise: a randomized controlled trial. *BMC Pregnancy & Childbirth.* 2013. 13:154 |
| **M. A. Q. Mutsaerts, H. Groen, Der Meer Buiter-Van, et al.** Effects of paternal and maternal lifestyle factors on pregnancy complications and perinatal outcome. A Dutch population-based birth-cohort study: The GECKO Drenthe study. *Human Reproduction.* 2012. 27: |
| **M. A. Sady, B. B. Haydon, S. P. Sady, M. W. Carpenter, P. D. Thompson and D. R. Coustan.** Cardiovascular-response to maximal cycle exercise during pregnancy and at 2 and 7 months post partum. *Obstet.Gynecol.* 1990. 162:1181-1185 |
| **M. A. Szmeja, C. Cramp, R. M. Grivell, A. R. Deussen, L. N. Yelland and J. M. Dodd.** PMC4280000; Use of a DVD to provide dietary and lifestyle information to pregnant women who are overweight or obese: a nested randomised trial. *BMC Pregnancy & Childbirth.* 2014. 14:409 |
| **M. A. Szmeja, C. Cramp, R. M. Grivell, A. R. Deussen, L. N. Yelland and J. M. Dodd.** Use of a DVD to provide dietary and lifestyle information to pregnant women who are overweight or obese: a nested randomised trial. *BMC pregnancy and childbirth.* 2014. 14:12 |
| **M. Aittasalo, J. Raitanen, T. I. Kinnunen, K. Ojala, P. Kolu and R. Luoto.** Is intensive counseling in maternity care feasible and effective in promoting physical activity among women at risk for gestational diabetes? Secondary analysis of a cluster randomized NELLI study in Finland. *International Journal of Behavioral Nutrition and Physical Activity.* 2012. 9 (no pagination): |
| **M. Aittasalo, M. Pasanen, M. Fogelholm, T. I. Kinnunen, K. Ojala and R. Luoto.** Physical activity counseling in maternity and child health care - A controlled trial. *BMC Womens Health.* 2008. 8: |
| **M. B. Sexton, H. A. Flynn, C. Lancaster, et al.** Predictors of recovery from prenatal depressive symptoms from pregnancy through postpartum. 2012. 21:43-49 |
| **M. Bisson, C. Rheaume, E. Bujold, A. Tremblay and I. Marc.** Modulation of blood pressure response to exercise by physical activity and relationshipwith resting blood pressure during pregnancy. *J.Hypertens.* 2014. 32:1450-1457 |
| **M. Bisson, C. Rheaume, E. Bujold, A. Tremblay and I. Marc.** Modulation of blood pressure response to exercise by physical activity and relationship with resting blood pressure during pregnancy. 2014. 32:1450-7; discussion 1457 |
| **M. Bisson, N. Almeras, J. Plaisance, et al.** Maternal fitness at the onset of the second trimester of pregnancy: correlates and relationship with infant birth weight. *Pediatric Obesity.* 2013. 8:464-474 |
| **M. Bisson, N. Almeras, S. S. Dufresne, et al.** A 12-Week Exercise Program for Pregnant Women with Obesity to Improve Physical Activity Levels: An Open Randomised Preliminary Study. *Plos One.* 2015. 10: |
| **M. Bonzini, D. Coggon, K. Godfrey, H. Inskip, S. Crozier and K. T. Palmer.** PMC3088899 UKMS35217; Occupational physical activities, working hours and outcome of pregnancy: findings from the Southampton Women's Survey. *Occupational & Environmental Medicine.* 2009. 66:685-690 |
[truncated: 283,368 more chars]
